# Supplementary material for: Three-component dicarbofunctionalization of allylamines via nucleopalladation pathway: unlocking vicinal and geminal selectivity
Source: Royal Society of Chemistry journal article supplement (doi:10.1039/d4sc00607k), 2024-01-01

– **Electronic Supplementary Information** –

**Three-component dicarbofunctionalization of allylamines via  
nucleopalladation pathway: unlocking vicinal and geminal selectivity**

Nityananda Ballav, Shib Nath Saha, Shailesh Yadav and Mahiuddin Baidya\*

Department of Chemistry, Indian Institute of Technology Madras, Chennai-600036, India

[mbaidya@iitm.ac.in](mailto:mbaidya@iitm.ac.in)

## Table of Contents

|                                                                                             |     |
|---------------------------------------------------------------------------------------------|-----|
| 1) General information .....                                                                | S3  |
| 2) Optimization details in vicinal dicarbofunctionalization reaction .....                  | S4  |
| 3) Substrate preparation .....                                                              | S7  |
| 4) General procedure for three-component vicinal dicarbofunctionalization<br>reaction ..... | S8  |
| 5) Optimization details in geminal dicarbofunctionalization reaction .....                  | S9  |
| 6) General procedure for geminal dicarbofunctionalization reaction .....                    | S11 |
| 7) Scaled-up for three-component vicinal dicarbofunctionalization reaction .....            | S12 |
| 8) Scaled-up for geminal dicarbofunctionalization reaction .....                            | S12 |
| 9) Typical procedure for removal of the directing group .....                               | S13 |
| 10) Typical procedure for regioselective alkenylation reaction .....                        | S13 |
| 11) Typical procedure for regioselective aminoalkynylation .....                            | S14 |
| 12) Reaction mechanism.....                                                                 | S15 |
| 13) X-ray crystal data of compound 8j .....                                                 | S16 |
| 14) NMR spectroscopic data of synthesized compounds .....                                   | S18 |
| 15) NMR spectra of synthesized compounds .....                                              | S48 |

## 1. General information:

All reactions, unless mentioned otherwise, were carried out under air in flame-dried glassware and were stirred using a magnetic stir plate. Reactions were performed using commercial-grade solvent unless otherwise noted. CH<sub>3</sub>CN and DCE were dried over calcium hydride. Tetrahydrofuran was freshly distilled over sodium ketyl before use.

All reactions were monitored by thin layer chromatography (TLC) on Merck 60 F 254 precoated silica plates and visualized using a UV lamp (366 or 254 nm) or by use of potassium permanganate, 5 g K<sub>2</sub>CO<sub>3</sub>/100 mL water. Products were isolated by column chromatography (Merck silica gel 100-200 μm).

<sup>13</sup>C and <sup>1</sup>H NMR spectra were recorded on a Bruker 400 MHz or Bruker 500 MHz spectrometers. Chemical shift values (δ) are reported in ppm and calibrated to the residual solvent peak- CDCl<sub>3</sub> δ = 7.26 ppm for <sup>1</sup>H, δ = 77.16 for <sup>13</sup>C; DMSO-d<sub>6</sub> δ = 2.50 ppm for <sup>1</sup>H, δ = 39.50 ppm for <sup>13</sup>C; or calibrated to tetramethylsilane (δ = 0.00). All NMR spectra were recorded at ambient temperature (290 K) unless otherwise noted. <sup>1</sup>H NMR spectra are reported as follows: chemical shift (multiplicity, coupling constant, integration). The following abbreviations are used to indicate multiplicities: s, singlet; d, doublet; t, triplet; q, quartet; h, heptate; m, multiplet; dd, doublet of doublet; dt, doublet of triplet; dq, doublet of quartet; td, triplet of doublet; tt, triplet of triplet; dq, doublet of quartet; br, broad. Mass spectra were recorded by electron spray ionization (ESI) method on a Q-TOF Micro with a lock spray source.

Indole derivatives (**2**) were prepared following the literature procedure (*Org. Lett.* **2014**, *16*, 2958–2961; *J. Org. Chem.* **2018**, *83*, 3840–3856).

## 2. Optimization details in vicinal dicarbofunctionalization reaction

### Solvent screening:

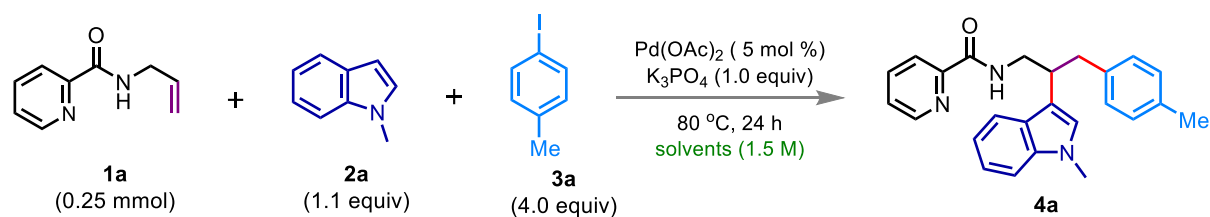

| S. No    | Solvents           | Yield of <b>4a</b> (%) |
|----------|--------------------|------------------------|
| 1        | MeOH               | NR                     |
| 2        | EtOH               | NR                     |
| 3        | TFE                | < 10 %                 |
| <b>4</b> | <b>HFIP</b>        | <b>56</b>              |
| 5        | tert-Butyl alcohol | NR                     |
| 6        | THF                | NR                     |
| 7        | MeCN               | NR                     |
| 8        | DCE                | NR                     |
| 9        | Dioxane            | NR                     |
| 10       | DMA                | NR                     |
| 11       | DMF                | NR                     |
| 12       | DMSO               | NR                     |

### Base screening:

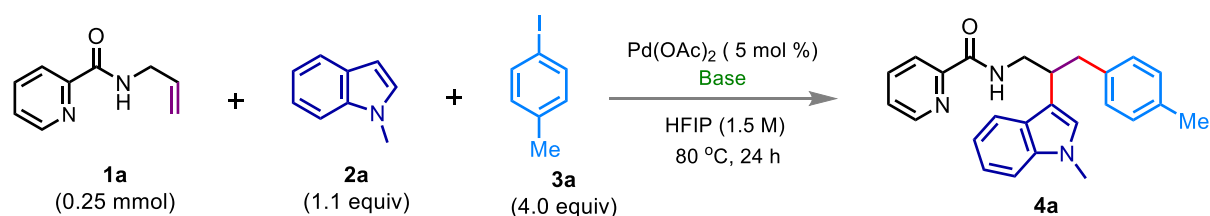

| S. No | Base                                         | Yield of <b>4a</b> (%) |
|-------|----------------------------------------------|------------------------|
| 1     | Li <sub>2</sub> CO <sub>3</sub> (1.0 equiv)  | 40                     |
| 2     | Na <sub>2</sub> CO <sub>3</sub> (1.0 equiv)  | 45                     |
| 3     | K <sub>2</sub> CO <sub>3</sub> (1.0 equiv)   | 38                     |
| 4     | Cs <sub>2</sub> CO <sub>3</sub> (1.0 equiv)  | 48                     |
| 5     | Ag <sub>2</sub> CO <sub>3</sub> (1.0 equiv)  | 30                     |
| 6     | Na <sub>2</sub> HPO <sub>4</sub> (1.0 equiv) | 35                     |
| 7     | K <sub>2</sub> HPO <sub>4</sub> (1.0 equiv)  | 52                     |
| 9     | NaOAc (1.0 equiv)                            | NR                     |
| 10    | KOAc (1.0 equiv)                             | NR                     |

|           |                                                                                                                |           |
|-----------|----------------------------------------------------------------------------------------------------------------|-----------|
| 11        | $K_2HPO_4$ (1.0 equiv) + $K_3PO_4$ (1.0 equiv)                                                                 | 62        |
| 12        | $K_2HPO_4$ (0.5 equiv) + $K_3PO_4$ (0.5 equiv)                                                                 | 64        |
| 13        | $K_2HPO_4$ (0.5 equiv) + $K_3PO_4$ (1.0 equiv)                                                                 | 61        |
| 14        | $K_2HPO_4$ (1.0 equiv) + $K_3PO_4$ (0.5 equiv)                                                                 | 68        |
| <b>15</b> | <b><math>K_2HPO_4</math> (1.0 equiv) + <math>K_3PO_4</math> (0.5 equiv)<br/>+ <math>H_2O</math> (10 equiv)</b> | <b>78</b> |
| 16        | $K_2HPO_4$ (1.0 equiv) + $K_3PO_4$ (0.5 equiv)<br>+ $H_2O$ (5 equiv)                                           | 73        |
| 17        | $K_2HPO_4$ (1.0 equiv) + $K_3PO_4$ (0.5 equiv)<br>+ $H_2O$ (20 equiv)                                          | 74        |

#### HFIP amount:

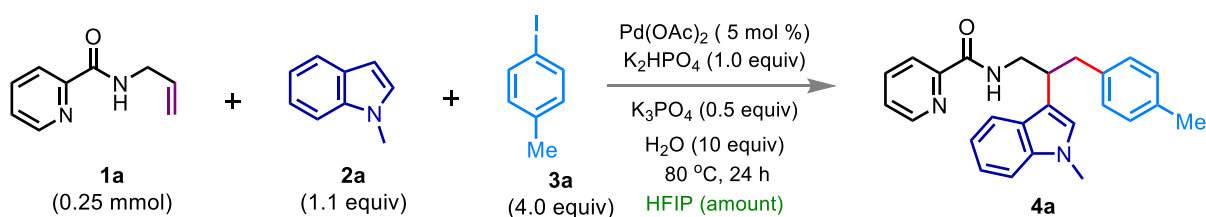

| S. No    | HFIP(amount) | Yield of <b>4a</b> (%) |
|----------|--------------|------------------------|
| 1        | 0.1 M        | 52                     |
| 2        | 0.5 M        | 54                     |
| 3        | 1.0 M        | 67                     |
| <b>4</b> | <b>1.5 M</b> | <b>78</b>              |
| 5        | 2.0 M        | 75                     |

#### Temperature screening:

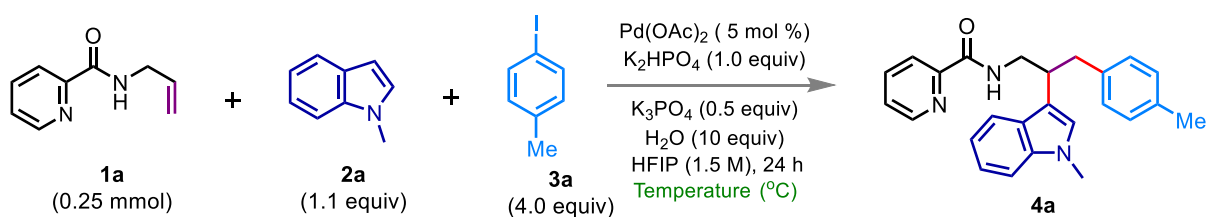

| S. No    | Temperature (°C) | Yield of <b>4a</b> (%) |
|----------|------------------|------------------------|
| 1        | rt               | 45                     |
| 2        | 60               | 56                     |
| <b>3</b> | <b>80</b>        | <b>78</b>              |
| 4        | 100              | 75                     |
| 5        | 120              | 76                     |

### Catalyst screening:

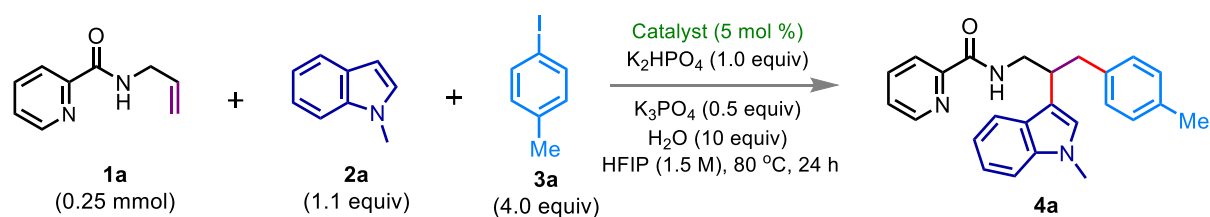

| S. No    | Catalyst                         | Yield of <b>4a</b> (%) |
|----------|----------------------------------|------------------------|
| 1        | NiBr <sub>2</sub>                | NR                     |
| 2        | Ni(OAc) <sub>2</sub>             | NR                     |
| 3        | CoCl <sub>2</sub>                | NR                     |
| 4        | Co(OAc) <sub>2</sub>             | NR                     |
| 5        | Pd(OAc) <sub>2</sub> (2.5 mol %) | 58                     |
| <b>6</b> | <b>Pd(OAc)<sub>2</sub></b>       | <b>78</b>              |

### Equivalent of aryl iodide:

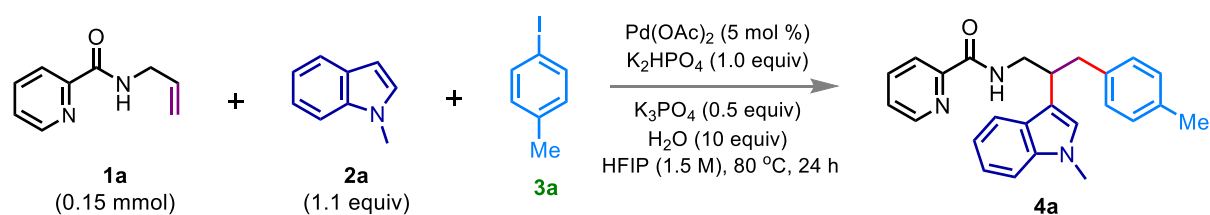

| S. No    | 1-iodo-4-methylbenzene, <b>3a</b> (equiv) | Yield of <b>4a</b> (%) |
|----------|-------------------------------------------|------------------------|
| 1        | 1.2                                       | 30                     |
| 2        | 2                                         | 45                     |
| 3        | 3                                         | 70                     |
| <b>4</b> | <b>4</b>                                  | <b>79</b>              |
| 5        | 5                                         | 77                     |
| 6        | 6                                         | 75                     |

### Equivalent of nucleophile:

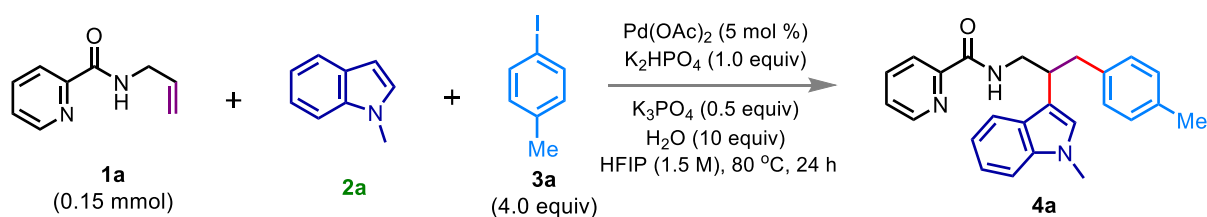

| S. No    | Nucleophile, <b>2a</b> (equiv) | Yield of <b>4a</b> (%) |
|----------|--------------------------------|------------------------|
| <b>1</b> | <b>1.1</b>                     | <b>79</b>              |
| 2        | 2                              | 65                     |
| 3        | 3                              | 43                     |
| 4        | 4                              | 20                     |

### 3. Substrate preparation

#### Synthesis of pharmacophore coupled aryl iodide derivatives (**3aa-ag**):

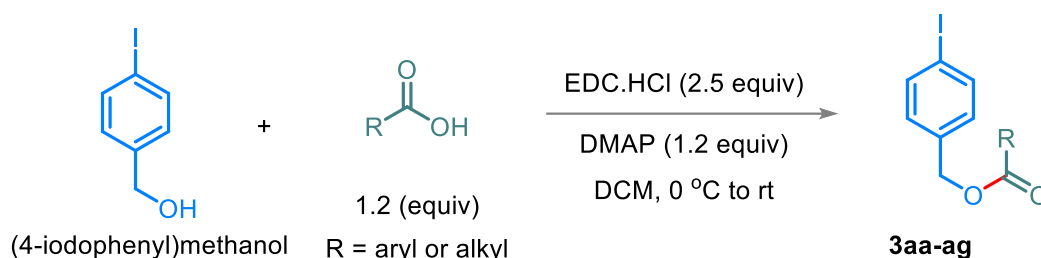

#### GP-1:

Aryl or alkyl carboxylic acid (1.2 equiv) and 4-*N,N*-dimethylaminopyridine (DMAP, 1.2 equiv) were taken in a 50 mL round bottom flask under nitrogen. Anhydrous DCM (15 mL) was added and the mixture was cooled to 0 °C. *N*'-(3-dimethylaminopropyl)-*N*-ethylcarbodiimide hydrochloride salt (EDC·HCl, 2.5 equiv) was added under nitrogen and the mixture was stirred for 10 minutes at the same temperature. Then, (4-iodophenyl)methanol (1.5 mmol, 1.0 equiv) was added portion wise and the mixture was stirred at room temperature overnight. Upon completion (TLC monitored), 10% aqueous NaHCO<sub>3</sub> solution (15 mL) was added to the reaction mixture and extracted with CH<sub>2</sub>Cl<sub>2</sub> (10 mL×3 times). The combined extracts were washed with brine, dried over Na<sub>2</sub>SO<sub>4</sub>, and evaporated under reduced pressure. The crude residue was purified through column chromatography on silica gel using ethyl acetate in hexane to get the pure products **3aa-ag**.

#### 4) General procedure for three-component vicinal dicarbofunctionalization reaction:

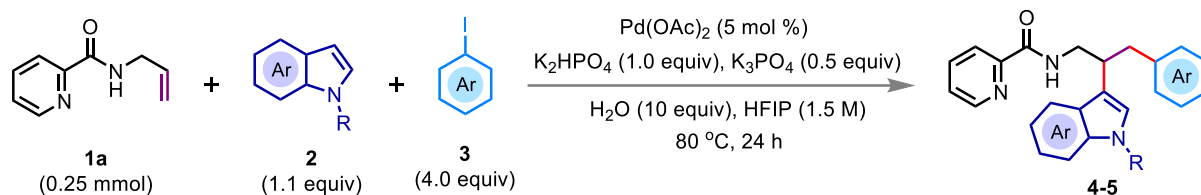

##### GP-2:

To an oven-dried screw cap reaction tube,  $N$ -allylpicolinamide (**1a**, 0.25 mmol, 1.0 equiv), corresponding indole derivatives **2** (1.1 equiv), aryl iodides **3** (4.0 equiv),  $\text{K}_2\text{HPO}_4$  (1.0 equiv),  $\text{K}_3\text{PO}_4$  (0.5 equiv),  $\text{Pd}(\text{OAc})_2$  (5 mol %), and  $\text{H}_2\text{O}$  (10 equiv) were taken. HFIP (0.17 mL, 1.5 M) was added. Then, the reaction tube was capped and placed in a preheated oil bath at  $80^\circ\text{C}$  for 24 h. After completion of the reaction (monitored by TLC), the crude mixture was diluted with DCM and concentrated on a rotavap. The crude residue was purified through column chromatography on silica gel using ethyl acetate in hexane to get pure products **4-5**.

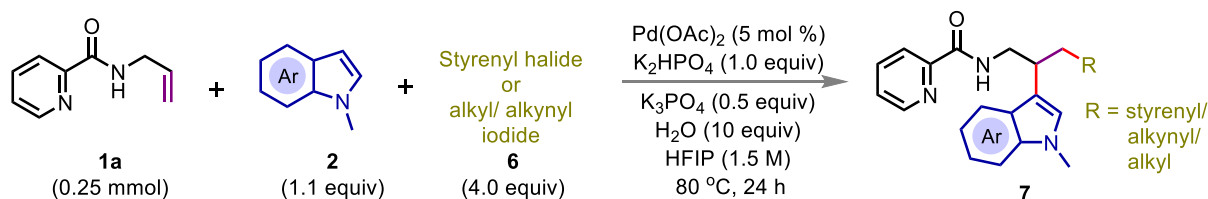

##### GP-3:

To an oven-dried screw cap reaction tube,  $N$ -allylpicolinamide (**1a**, 0.25 mmol, 1.0 equiv), corresponding indole derivatives **2** (1.1 equiv), styrenyl halides / alkyl iodide / alkynyl iodide **6** (4.0 equiv),  $\text{K}_2\text{HPO}_4$  (1.0 equiv),  $\text{K}_3\text{PO}_4$  (0.5 equiv),  $\text{Pd}(\text{OAc})_2$  (5 mol %), and  $\text{H}_2\text{O}$  (10 equiv) were taken. HFIP (0.17 mL, 1.5 M) was added. Then, the reaction tube was capped and placed in a preheated oil bath at  $80^\circ\text{C}$  for 24 h. After completion of the reaction (monitored by TLC), the crude mixture was diluted with DCM and concentrated on a rotavap. The crude residue was purified through column chromatography on silica gel using ethyl acetate in hexane to get pure products **7**.



## 5. Optimization details in geminal dicarbofunctionalization reaction

### Base screening:

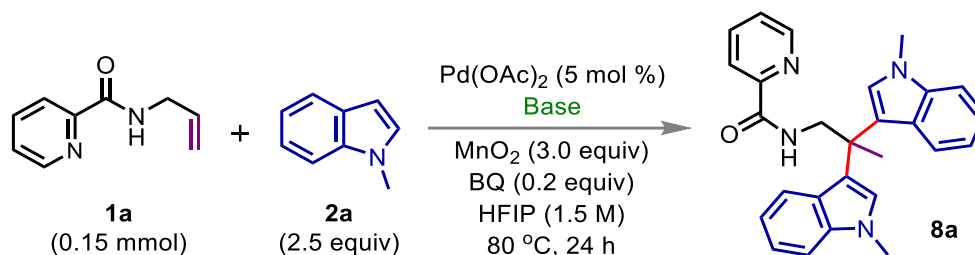

| S. No    | Base                                                                                                         | Yield of <b>8a</b> (%) |
|----------|--------------------------------------------------------------------------------------------------------------|------------------------|
| 1        | $\text{K}_2\text{HPO}_4$ (1.0 equiv) + $\text{K}_3\text{PO}_4$ (0.5 equiv) + $\text{H}_2\text{O}$ (10 equiv) | 67                     |
| <b>2</b> | <b><math>\text{K}_3\text{PO}_4</math> (1.0 equiv)</b>                                                        | <b>73</b>              |
| 3        | $\text{Li}_2\text{CO}_3$ (1.0 equiv)                                                                         | 54                     |
| 2        | $\text{Na}_2\text{CO}_3$ (1.0 equiv)                                                                         | 55                     |
| 3        | $\text{K}_2\text{CO}_3$ (1.0 equiv)                                                                          | 45                     |
| 4        | $\text{Cs}_2\text{CO}_3$ (1.0 equiv)                                                                         | 65                     |
| 5        | $\text{Ag}_2\text{CO}_3$ (1.0 equiv)                                                                         | 35                     |
| 6        | $\text{Na}_2\text{HPO}_4$ (1.0 equiv)                                                                        | 59                     |
| 7        | $\text{K}_2\text{HPO}_4$ (1.0 equiv)                                                                         | 69                     |
| 9        | $\text{NaOAc}$ (1.0 equiv)                                                                                   | NR                     |
| 10       | $\text{KOAc}$ (1.0 equiv)                                                                                    | NR                     |

### Catalyst screening:

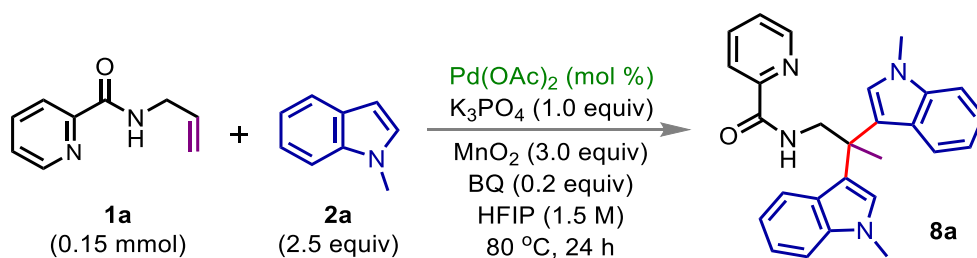

| S. No    | $\text{Pd}(\text{OAc})_2$ (mol %) | Yield of <b>8a</b> (%) |
|----------|-----------------------------------|------------------------|
| 1        | 2.5                               | 55                     |
| 2        | 5                                 | 73                     |
| <b>3</b> | <b>10</b>                         | <b>82</b>              |
| 4        | 15                                | 75                     |

### Amount of solvent:

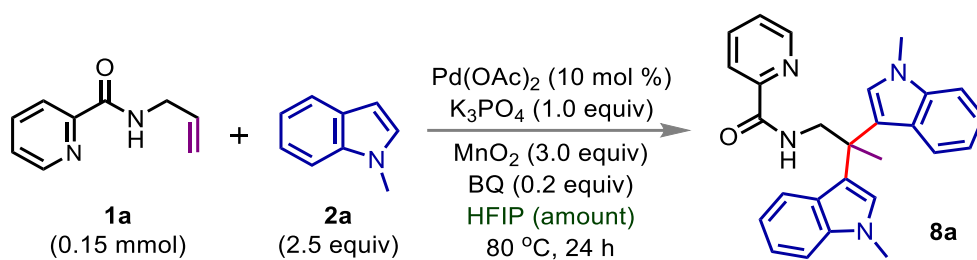

| S. No    | Solvent amount | Yield of <b>8a</b> (%) |
|----------|----------------|------------------------|
| 1        | 0.1 M          | 84                     |
| <b>2</b> | <b>0.5 M</b>   | <b>85</b>              |
| 3        | 1.0 M          | 81                     |
| 4        | 1.5 M          | 82                     |
| 5        | 2.0 M          | 78                     |

### Temperature screening:

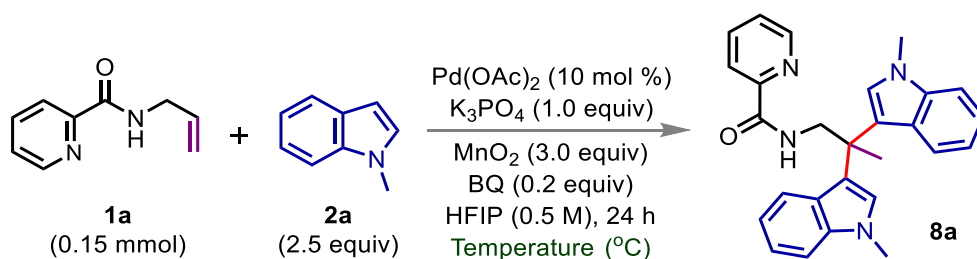

| S. No    | Temperature (°C) | Yield of <b>8a</b> (%) |
|----------|------------------|------------------------|
| 1        | rt               | 56                     |
| <b>2</b> | <b>60</b>        | <b>92</b>              |
| 3        | 80               | 85                     |
| 4        | 100              | 75                     |
| 5        | 120              | 77                     |

### Oxidant screening:

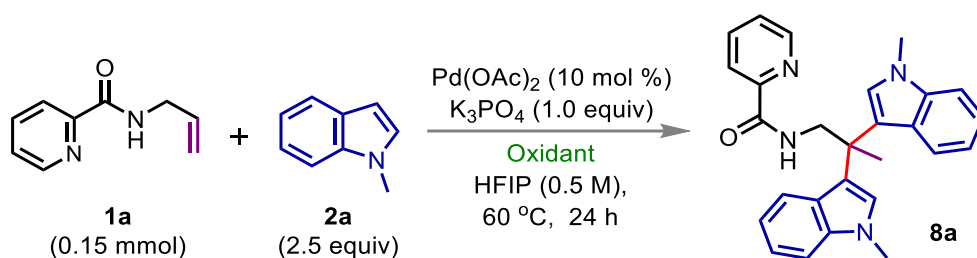

| S. No | Oxidant                                       | Yield of <b>8a</b> (%) |
|-------|-----------------------------------------------|------------------------|
| 1     | MnO <sub>2</sub> (3.0 equiv) + BQ (0.2 equiv) | 92                     |
| 2     | BQ (0.2 equiv) + O <sub>2</sub>               | 81                     |
| 3     | MnO <sub>2</sub> (3.0 equiv)                  | 71                     |
| 4     | BQ (0.5 equiv)                                | 73                     |
| 5     | Cu <sub>2</sub> O (0.5 equiv)                 | 75                     |
| 6     | Cu(OAc) <sub>2</sub> (0.5 equiv)              | 65                     |

### 6. General procedure for geminal dicarbofunctionalization reaction

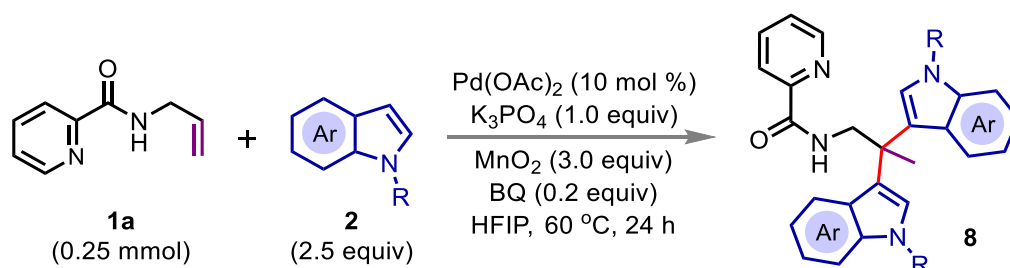

#### GP-4:

To an oven-dried screw cap reaction tube, *N*-allylpicolinamide (**1a**, 0.25 mmol, 1.0 equiv), corresponding indole derivatives **2** (2.5 equiv), K<sub>3</sub>PO<sub>4</sub> (1.0 equiv), Pd(OAc)<sub>2</sub> (10 mol %), MnO<sub>2</sub> (3.0 equiv) and BQ (0.2 equiv) were taken. HFIP (0.5 mL, 0.5 M) was added. Then, the reaction tube was capped and placed in a preheated oil bath at 60 °C for 24 h. After completion of the reaction (monitored by TLC), the crude mixture was diluted with DCM, filtered through celite pad and the filtrate was concentrated on a rotavap. The crude residue was purified through column chromatography on silica gel using ethyl acetate in hexane to get pure products **8**.

## 7. Scaled-up for three-component vicinal dicarbofunctionalization reaction

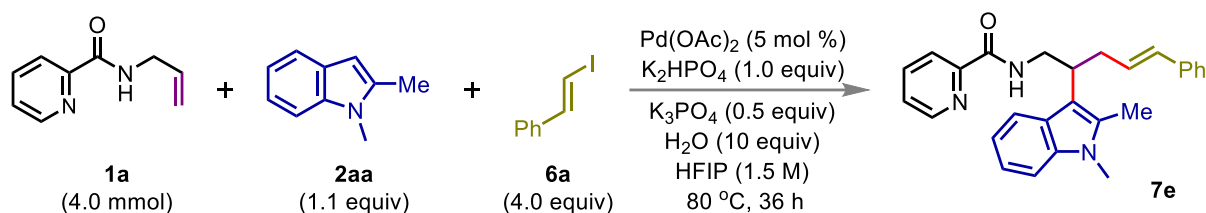

### TP-1:

To an oven-dried screw cap reaction tube, *N*-allylpicolinamide (**1a**, 4.0 mmol, 1.0 equiv), indole derivative **2aa** (1.1 equiv), styrenyl iodide **6a** (4.0 equiv),  $\text{K}_2\text{HPO}_4$  (1.0 equiv),  $\text{K}_3\text{PO}_4$  (0.5 equiv),  $\text{Pd(OAc)}_2$  (5 mol %), and  $\text{H}_2\text{O}$  (10 equiv) were taken. HFIP (2.7 mL, 1.5 M) was added. Then, the reaction tube was capped and placed in a preheated oil bath at 80 °C for 36 h. After completion of the reaction (monitored by TLC), the crude mixture was diluted with DCM and concentrated on a rotavap. The crude residue was purified through column chromatography on silica gel using ethyl acetate in hexane to get pure product **7e**.

## 8. Scaled-up for geminal dicarbofunctionalization reaction

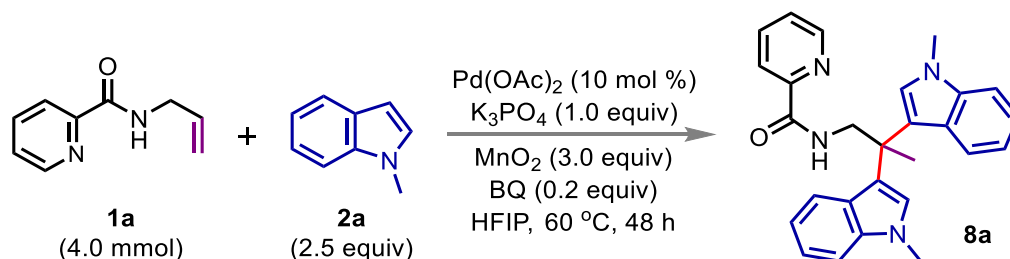

### TP-2:

To an oven-dried Schlenk reaction tube, *N*-allylpicolinamide (**1a**, 4.0 mmol, 1.0 equiv), indole derivatives **2a** (2.5 equiv),  $\text{K}_3\text{PO}_4$  (1.0 equiv),  $\text{Pd(OAc)}_2$  (10 mol %),  $\text{MnO}_2$  (3.0 equiv) and BQ (0.2 equiv) were taken. HFIP (8.0 mL, 0.5 M) was added. Then, the reaction tube was capped and placed in a preheated oil bath at 60 °C for 48 h. After completion of the reaction (monitored by TLC), the crude mixture was diluted with DCM, filtered through celite pad and the filtrate was concentrated on a rotavap. The crude residue was purified through column chromatography on silica gel using ethyl acetate in hexane to get pure product **8a**.

## 9. Typical procedure for removal of the directing group

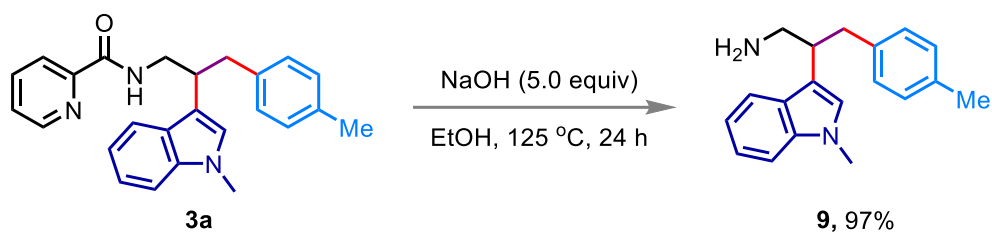

### TP-3:

To an oven-dried screw cap reaction tube, **3a** (0.3 mmol, 1.0 equiv) and NaOH (5.0 equiv) were taken. EtOH (1.5 mL) solvent was added. Then, the reaction mixture was stirred at 125 °C for 48 h. After completion of the reaction (TLC monitored), the reaction mixture was allowed to cool to room temperature, 5 ml H<sub>2</sub>O was added, and extracted with EtOAc (10 mL×3 times). The combined extracts were washed with brine followed by 10% aqueous NaHCO<sub>3</sub> solution (15 mL), dried over Na<sub>2</sub>SO<sub>4</sub>, and evaporated under reduced pressure to give pure functionally enriched aliphatic amine **9**.

## 10. Typical procedure for regioselective alkenylation reaction:

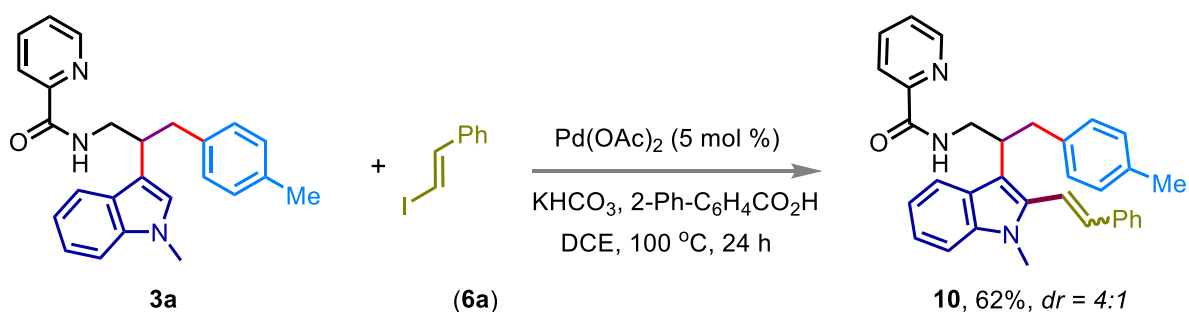

### TP-4:

To an oven-dried screw cap reaction tube, product **3a** (0.25 mmol, 1.0 equiv), (*E*)-(2-iodovinyl)benzene (**6a**, 2.0 equiv), Pd(OAc)<sub>2</sub> (5 mol %), KHCO<sub>3</sub> (2.0 equiv) and biphenyl-2-carboxylic acid (0.2 equiv) were taken. DCE (2.5 mL, 0.1 M) was added. Then, the reaction tube was capped and placed in a preheated oil bath at 100 °C for 24 h. After completion of the reaction (TLC monitored), the crude mixture was diluted with DCM and concentrated on a rotavap. The crude residue was purified through column chromatography on silica gel using ethyl acetate in hexane to get pure product **10**.

## 11. Typical procedure for regioselective aminoalkynylation

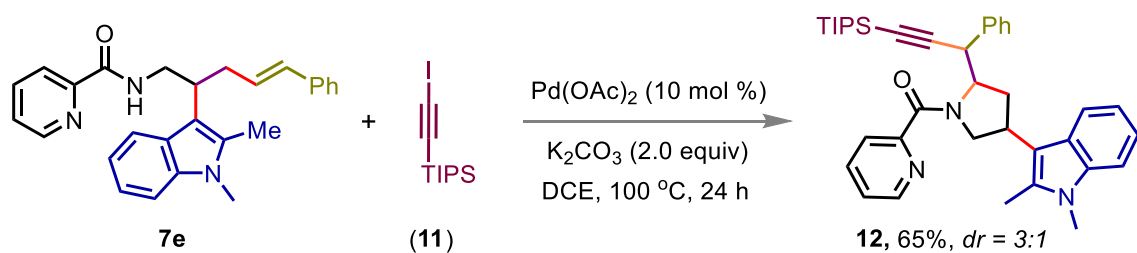

### TP-5:

To an oven-dried screw cap reaction tube, product **7e** (0.15 mmol, 1.0 equiv), (iodoethynyl)trisopropylsilane (**11**, 1.5 equiv), Pd(OAc)<sub>2</sub> (10 mol %), and K<sub>2</sub>CO<sub>3</sub> (2.0 equiv) were taken. DCE (1.5 mL, 0.1 M) was added. Then, the reaction tube was capped and placed in a preheated oil bath at 100 °C for 24 h. After completion of the reaction (TLC monitored), the crude mixture was diluted with DCM and concentrated on a rotavap. The crude residue was purified through column chromatography on silica gel using ethyl acetate in hexane to get pure product **12**.

## 12. Reaction Mechanism:

### A. Mechanism for three-component vicinal dicarbofunctionalization reaction.

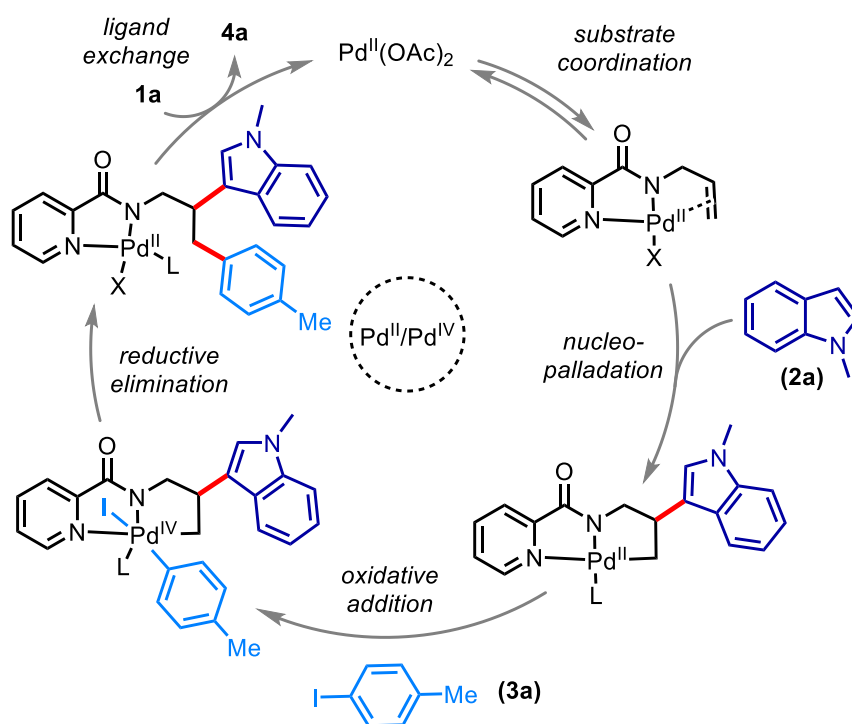

### B. Alternative mechanism for geminal dicarbofunctionalization reaction.

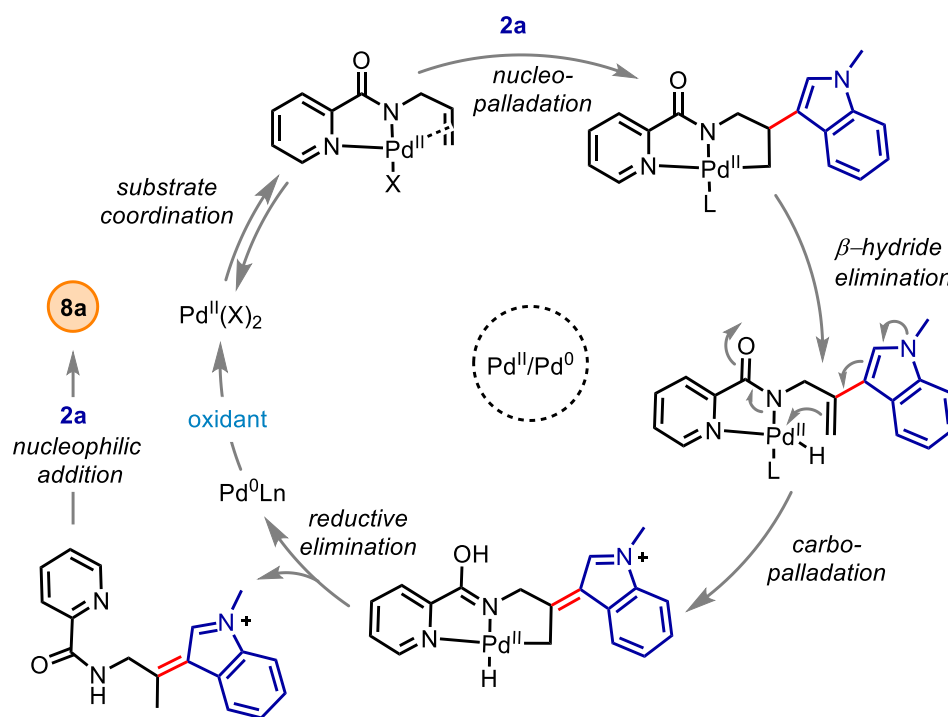

### 13. X-ray crystal data of compound **8j**:

**Crystallization:** Crystals of compound **8j** were obtained through a slow evaporation technique at room temperature from  $\text{CDCl}_3$ /hexane solvent mixture.

Crystal structure of compound **8j** (CCDC number: 2298509, Ellipsoid Probability 50%):

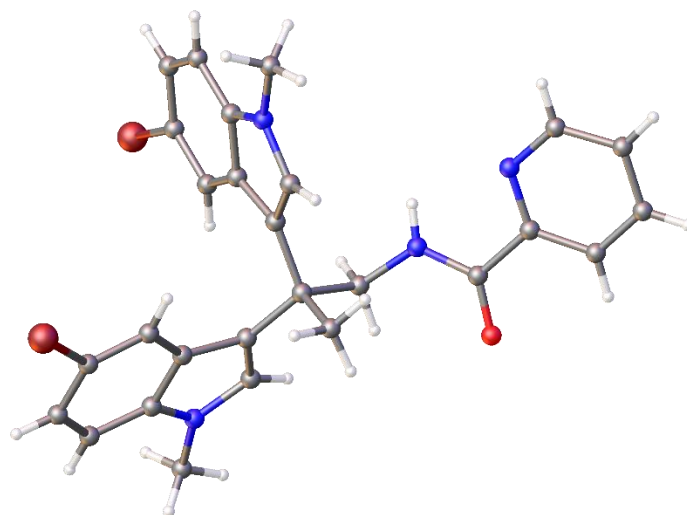

Table 1. Crystal data and structure refinement for **8j**.

|                             |                                                                                                                          |
|-----------------------------|--------------------------------------------------------------------------------------------------------------------------|
| Identification code         | <b>8j</b>                                                                                                                |
| Empirical formula           | $\text{C}_{27} \text{H}_{24} \text{Br}_2 \text{N}_4 \text{O}$                                                            |
| Formula weight              | 580.32                                                                                                                   |
| Temperature                 | 298(2) K                                                                                                                 |
| Wavelength                  | 0.71073 Å                                                                                                                |
| Crystal system, space group | Orthorhombic, $Pbc_a$                                                                                                    |
| Unit cell dimensions        | $a = 10.1637(6)$ Å $\alpha = 90$ deg.<br>$b = 19.7936(11)$ Å $\beta = 90$ deg.<br>$c = 25.9343(16)$ Å $\gamma = 90$ deg. |
| Volume                      | $5217.4(5)$ Å <sup>3</sup>                                                                                               |
| Z, Calculated density       | 8, 1.478 Mg/m <sup>3</sup>                                                                                               |



Absorption coefficient      3.134 mm<sup>-1</sup>

F(000)                      2336

Crystal size                0.279 x 0.091 x 0.042 mm

Theta range for data collection 3.260 to 25.057 deg.

Limiting indices            -12<=h<=12, -23<=k<=23, -30<=l<=30

Reflections collected / unique 167455 / 4609 [R(int) = 0.1872]

Completeness to theta = 25.057 99.7 %

Absorption correction      Semi-empirical from equivalents

Max. and min. transmission 0.7452 and 0.5861

Refinement method        Full-matrix least-squares on F<sup>2</sup>

Data / restraints / parameters 4609 / 0 / 310

Goodness-of-fit on F<sup>2</sup>      1.048

Final R indices [I>2sigma(I)] R1 = 0.0531, wR2 = 0.1253

R indices (all data)        R1 = 0.0903, wR2 = 0.1443

Extinction coefficient      n/a

Largest diff. peak and hole 0.356 and -0.646 e.A<sup>-3</sup>

### 13. NMR spectroscopic data of synthesized compounds:

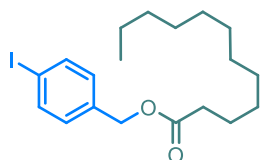

**3aa**

**4-iodobenzyl dodecanoate (3aa):** Compound **3aa** was synthesized according to GP-1 as a white solid, 95% yield (0.593 g); Eluent: 2-10% ethyl acetate in hexane;  $^1\text{H NMR}$  (400 MHz,  $\text{CDCl}_3$ )  $\delta$  7.68 (d,  $J = 7.5$  Hz, 2H), 7.09 (d,  $J = 7.6$  Hz, 2H), 5.04 (s, 2H), 2.34 (t,  $J = 7.5$  Hz, 2H), 1.66 – 1.59 (m, 2H), 1.30 – 1.25 (m, 16H), 0.88 (t,  $J = 6.5$  Hz, 3H) ppm;  $^{13}\text{C NMR}$  (101 MHz,  $\text{CDCl}_3$ )  $\delta$  173.7, 137.8, 136.0, 130.1, 93.9, 65.4, 34.4, 32.0, 29.7 (2 $\times$ C), 29.6, 29.5, 29.4, 29.2, 25.1, 22.8, 14.3 ppm.

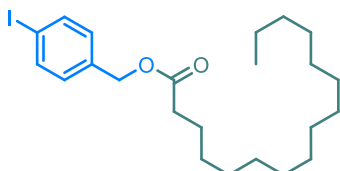

**3ab**

**4-iodobenzyl palmitate (3ab):** Compound **3ab** was synthesized according to GP-1 as a white solid, 94% yield (0.666 g); Eluent: 2-10% ethyl acetate in hexane;  $^1\text{H NMR}$  (400 MHz,  $\text{CDCl}_3$ )  $\delta$  7.69 (d,  $J = 7.3$  Hz, 2H), 7.09 (d,  $J = 7.6$  Hz, 2H), 5.04 (s, 2H), 2.34 (t,  $J = 7.4$  Hz, 2H), 1.66 – 1.59 (m, 2H), 1.29 – 1.25 (m, 24H), 0.88 (t,  $J = 6.1$  Hz, 3H) ppm;  $^{13}\text{C NMR}$  (101 MHz,  $\text{CDCl}_3$ )  $\delta$  173.7, 137.8, 135.9, 130.1, 93.9, 65.4, 34.4, 32.1, 29.83 (3C), 29.79 (2 $\times$ C), 29.7, 29.6, 29.5, 29.4, 29.2, 25.1, 22.8, 14.3 ppm.

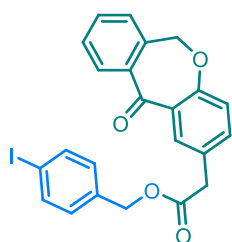

**3ac**

**4-iodobenzyl 2-(11-oxo-6,11-dihydrodibenzo[*b,e*]oxepin-2-yl)acetate (3ac):** Compound **3ac** was synthesized according to GP-1 as a white solid, 97% yield (0.704 g); Eluent: 5-15% ethyl acetate in hexane;  $^1\text{H NMR}$  (400 MHz,  $\text{CDCl}_3$ )  $\delta$  8.03 (s, 1H), 7.78 (d,  $J = 7.7$  Hz, 1H), 7.57 – 7.55 (m, 2H), 7.47 – 7.43 (m, 1H), 7.39 – 7.34 (m, 1H), 7.30 (d,  $J = 8.6$  Hz, 1H), 7.25 (d,  $J = 7.4$  Hz, 1H), 6.96 (dd,  $J = 8.3, 2.1$  Hz, 2H), 6.94 – 6.90 (m, 1H), 5.07 (s, 2H), 4.97 (s, 2H), 3.58 (s, 2H) ppm;  $^{13}\text{C NMR}$  (101 MHz,  $\text{CDCl}_3$ )  $\delta$  190.8, 171.1, 160.5, 140.4, 137.7, 136.4, 135.5, 135.4, 132.9, 132.5, 130.1, 129.5, 129.3, 127.9, 127.5, 125.2, 121.2, 94.1, 73.6, 66.0, 40.2 ppm.

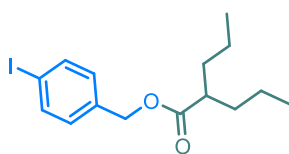

**3ad**

**4-iodobenzyl 2-propylpentanoate (3ad):** Compound **3ad** was synthesized according to GP-1 as a white solid, 94% yield (0.507 g); Eluent: 2-10% ethyl acetate in hexane;  $^1\text{H NMR}$  (400 MHz,  $\text{CDCl}_3$ )  $\delta$  7.68 (d,  $J = 8.0$  Hz, 2H), 7.09 (d,  $J = 7.9$  Hz, 2H), 5.04 (s, 2H), 2.45 – 2.37 (m, 1H), 1.65 – 1.55 (m, 2H), 1.47 – 1.38 (m, 2H), 1.31 – 1.22 (m, 4H), 0.88 (t,  $J = 7.3$  Hz, 6H) ppm;  $^{13}\text{C NMR}$  (101 MHz,  $\text{CDCl}_3$ )  $\delta$  176.4, 137.7, 136.1, 130.1, 93.8, 65.2, 45.3, 34.7, 20.7, 14.1 ppm.

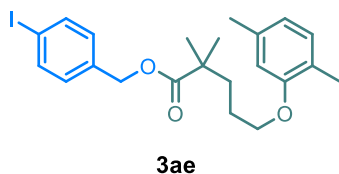

**4-iodobenzyl 5-(2,5-dimethylphenoxy)-2,2-dimethylpentanoate (3ae):** Compound **3ae** was synthesized according to GP-1 as a white solid, 98% yield (0.685 g); Eluent: 5-15% ethyl acetate in hexane;  $^1\text{H NMR}$  (400 MHz,  $\text{CDCl}_3$ )  $\delta$  7.68 (d,  $J = 8.1$  Hz, 2H), 7.09 (d,  $J = 8.1$  Hz, 2H), 7.01 (d,  $J = 7.4$  Hz, 1H), 6.67 (d,  $J = 7.4$  Hz, 1H), 6.60 (s, 1H), 5.05 (s, 2H), 3.89 (t,  $J = 5.3$  Hz, 2H), 2.32 (s, 3H), 2.16 (s, 3H), 1.77 – 1.69 (m, 4H), 1.25 (s, 6H) ppm;  $^{13}\text{C NMR}$  (101 MHz,  $\text{CDCl}_3$ )  $\delta$  177.6, 157.0, 137.8, 136.6, 136.1, 130.4, 129.9, 123.7, 120.9, 112.1, 93.8, 68.0, 65.6, 42.3, 37.2, 25.3 (2 $\times$ C), 21.5, 15.9 ppm.

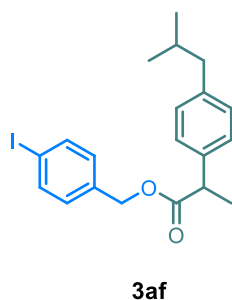

**4-iodobenzyl 2-(4-isobutylphenyl)propanoate (3af):** Compound **3af** was synthesized according to GP-1 as a white solid, 95% yield (0.601 g); Eluent: 5-15% ethyl acetate in hexane;  $^1\text{H NMR}$  (400 MHz,  $\text{CDCl}_3$ )  $\delta$  7.62 (d,  $J = 7.9$  Hz, 2H), 7.19 (d,  $J = 7.8$  Hz, 2H), 7.10 (d,  $J = 7.8$  Hz, 2H), 6.95 (d,  $J = 7.9$  Hz, 2H), 5.04 (s, 2H), 3.75 (q,  $J = 7.1$  Hz, 1H), 2.46 (d,  $J = 7.2$  Hz, 2H), 1.91 – 1.81 (m, 1H), 1.51 (d,  $J = 7.1$  Hz, 3H), 0.91 (d,  $J = 6.6$  Hz, 6H) ppm;  $^{13}\text{C NMR}$  (101 MHz,  $\text{CDCl}_3$ )  $\delta$  174.5, 140.8, 137.7, 137.6, 135.9, 129.7, 129.5, 127.3, 93.7, 65.6, 45.2, 45.1, 30.3, 22.5, 18.4 ppm.

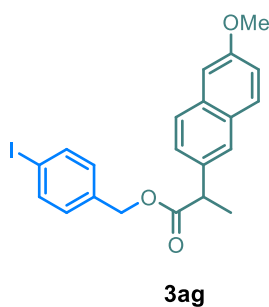

**4-iodobenzyl 2-(6-methoxynaphthalen-2-yl)propanoate (3ag):** Compound **3ag** was synthesized according to GP-1 as a white solid, 96% yield (0.697 g); Eluent: 5-15% ethyl acetate in hexane;  $^1\text{H NMR}$  (400 MHz,  $\text{CDCl}_3$ )  $\delta$  7.68 (t,  $J = 8.5$  Hz, 2H), 7.62 – 7.58 (m, 3H), 7.38 (d,  $J = 8.3$  Hz, 1H), 7.18 – 7.12 (m, 2H), 6.95 (d,  $J = 7.4$  Hz, 2H), 5.04 (s, 2H), 3.93 – 3.87 (m, 4H), 1.59 (d,  $J = 6.9$  Hz, 3H) ppm;  $^{13}\text{C NMR}$  (101 MHz,  $\text{CDCl}_3$ )  $\delta$  174.5, 157.8, 137.7, 135.8, 135.5, 133.8, 129.9, 129.4, 129.0, 127.3, 126.3, 126.1, 119.2, 105.7, 93.9, 65.8, 55.5, 45.5, 18.6 ppm.

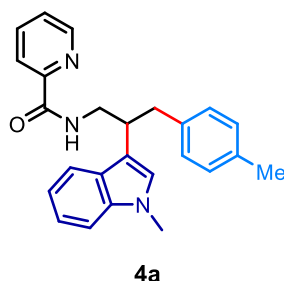

***N*-(2-(1-methyl-1*H*-indol-3-yl)-3-(*p*-tolyl)propyl)picolinamide (4a):**

Compound **4a** was synthesized according to GP-2 as yellow oil, 78% yield (75 mg); Eluent: 15-25% ethyl acetate in hexane;  $^1\text{H NMR}$  (400 MHz,  $\text{CDCl}_3$ )  $\delta$  8.45 (d,  $J = 4.8$  Hz, 1H), 8.21 (d,  $J = 7.8$  Hz, 1H), 8.10 (s, 1H), 7.83 (t,  $J = 7.6$  Hz, 1H), 7.76 (d,  $J = 7.9$  Hz, 1H), 7.40 – 7.34 (m, 2H), 7.30 – 7.28 (m, 1H), 7.15 (t,  $J = 7.5$  Hz, 1H), 7.11 – 7.06 (m, 4H), 6.94 (s, 1H), 3.90 – 3.82 (m, 2H), 3.77 (s, 3H), 3.65 – 3.58 (m, 1H), 3.24 – 3.19 (m, 1H), 3.11 – 3.05 (m, 1H), 2.32 (s, 3H) ppm;  $^{13}\text{C NMR}$  (101 MHz,  $\text{CDCl}_3$ )  $\delta$  164.3, 150.0, 147.9, 137.5, 137.4, 137.1, 135.5, 129.0 (2 $\times$ C), 127.3, 126.5, 126.0, 122.3, 121.7, 119.5, 118.9, 115.5, 109.4, 43.5, 39.6, 38.9, 32.8, 21.1 ppm; **HRMS** (ESI-TOF)  $m/z$ :  $[\text{M}+\text{Na}]^+$  Calcd. For  $\text{C}_{25}\text{H}_{25}\text{N}_3\text{ONa}^+$  406.1890 found 406.1892.

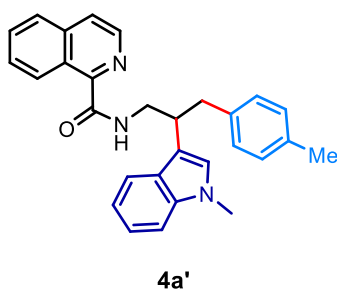

***N*-(2-(1-methyl-1*H*-indol-3-yl)-3-(*p*-tolyl)propyl)isoquinoline-1-carboxamide**

**(4a')**: Compound **4a'** was synthesized according to GP-2 as yellow oil, 69% yield (75 mg); Eluent: 15-25% ethyl acetate in hexane;  $^1\text{H NMR}$  (400 MHz,  $\text{CDCl}_3$ )  $\delta$  9.45 (d,  $J = 8.2$  Hz, 1H), 8.23 – 8.21 (m, 1H), 8.04 (s, 1H), 7.71 – 7.65 (m, 2H), 7.61 – 7.54 (m, 3H), 7.21 (d,  $J = 8.2$  Hz, 1H), 7.14 – 7.12 (m, 1H), 7.04 – 6.98 (m, 3H), 6.94 – 6.92 (m, 2H), 6.84 (d,  $J = 3.1$  Hz, 1H), 3.84 – 3.72 (m, 2H), 3.63 (s, 3H), 3.54 – 3.49 (m, 1H), 3.14 – 3.09 (m, 1H), 3.01 – 2.96 (m, 1H), 2.17 (s, 3H) ppm;  $^{13}\text{C NMR}$  (101 MHz,  $\text{CDCl}_3$ )  $\delta$  166.0, 148.6, 140.1, 137.44, 137.42, 137.2, 135.5, 130.6, 129.09, 129.05, 128.6, 128.0, 127.3, 127.0, 126.8, 126.6, 124.2, 121.7, 119.5, 118.9, 115.5, 109.5, 43.6, 39.6, 38.9, 32.9, 21.1 ppm; **HRMS** (ESI-TOF)  $m/z$ :  $[\text{M}+\text{Na}]^+$  Calcd. For  $\text{C}_{29}\text{H}_{27}\text{N}_3\text{O}\text{Na}^+$  456.2046 found 456.2040.

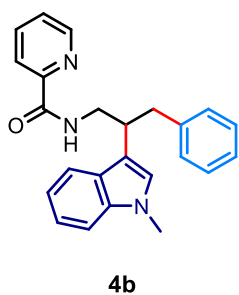

***N*-(2-(1-methyl-1*H*-indol-3-yl)-3-phenylpropyl)picolinamide (4b)**

Compound **4b** was synthesized according to GP-2 as brown liquid, 75% yield (69 mg); Eluent: 15-25% ethyl acetate in hexane;  $^1\text{H NMR}$  (400 MHz,  $\text{CDCl}_3$ )  $\delta$  8.41 (d,  $J = 4.7$  Hz, 1H), 8.17 (d,  $J = 7.9$  Hz, 1H), 8.09 (s, 1H), 7.80 (t,  $J = 7.7$  Hz, 1H), 7.69 (d,  $J = 7.9$  Hz, 1H), 7.37 – 7.34 (m, 1H), 7.30 (d,  $J = 8.2$  Hz, 1H), 7.25 – 7.18 (m, 3H), 7.16 – 7.08 (m, 4H), 6.88 (s, 1H), 3.89 – 3.78 (m, 2H), 3.72 (s, 3H), 3.63 – 3.56 (m, 1H), 3.22 – 3.17 (m, 1H), 3.10 – 3.05 (m, 1H) ppm;  $^{13}\text{C NMR}$  (101 MHz,  $\text{CDCl}_3$ )  $\delta$  164.3, 150.0, 147.9, 140.3, 137.5, 137.4, 129.2, 128.3, 127.3, 126.5, 126.1 (2 $\times$ C), 122.3, 121.7, 119.5, 119.0, 115.4, 109.5, 43.6, 40.0, 38.9, 32.8 ppm. **HRMS** (ESI-TOF)  $m/z$ :  $[\text{M}+\text{Na}]^+$  Calcd. For  $\text{C}_{24}\text{H}_{23}\text{N}_3\text{O}\text{Na}^+$  392.1733 found 392.1738.

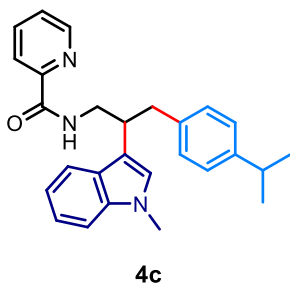

***N*-(3-(4-isopropylphenyl)-2-(1-methyl-1*H*-indol-3-yl)propyl)picolinamide**

**(4c)**: Compound **4c** was synthesized according to GP-2 as yellow oil, 79% yield (81 mg); Eluent: 15-25% ethyl acetate in hexane;  $^1\text{H NMR}$  (400 MHz,  $\text{CDCl}_3$ )  $\delta$  8.39 (d,  $J = 4.4$  Hz, 1H), 8.14 (d,  $J = 7.8$  Hz, 1H), 8.03 (s, 1H), 7.79 – 7.75 (m, 1H), 7.68 (d,  $J = 7.9$  Hz, 1H), 7.33 – 7.28 (m, 2H), 7.24 – 7.22 (m, 1H), 7.11 – 7.06 (m, 5H), 6.90 (s, 1H), 3.87 – 3.75 (m, 2H), 3.72 (s, 3H), 3.61 – 3.54 (m, 1H), 3.18 – 3.13 (m, 1H), 3.05 – 2.99 (m, 1H), 2.83 (h,  $J = 6.9$  Hz, 1H), 1.20 (d,  $J = 6.9$  Hz, 6H) ppm;  $^{13}\text{C NMR}$  (101 MHz,  $\text{CDCl}_3$ )  $\delta$  164.4, 150.1, 148.0, 146.6, 137.5, 137.4, 137.3, 129.1, 127.4, 126.4 (2 $\times$ C), 126.0, 122.2, 121.7, 119.5, 118.9, 115.6, 109.4, 43.4, 39.7, 38.7, 33.8, 32.8, 24.1 ppm; **HRMS** (ESI-TOF)  $m/z$ :  $[\text{M}+\text{H}]^+$  Calcd. For  $\text{C}_{27}\text{H}_{30}\text{N}_3\text{O}^+$  412.2383 found 412.2393.

***N*-(3-(4-(*tert*-butyl)phenyl)-2-(1-methyl-1*H*-indol-3-yl)propyl)picolinamide**

**(4d):** Compound **4d** was synthesized according to GP-2 as brown oil, 81% yield (86 mg); Eluent: 15-25% ethyl acetate in hexane;  $^1\text{H NMR}$  (400 MHz,  $\text{CDCl}_3$ )  $\delta$  8.45 (d,  $J = 4.4$  Hz, 1H), 8.21 (d,  $J = 7.9$  Hz, 1H), 8.12 (s, 1H), 7.85 – 7.81 (m, 1H), 7.74 (d,  $J = 7.9$  Hz, 1H), 7.40 – 7.28 (m, 5H), 7.19 – 7.13 (m, 3H), 6.98 (s, 1H), 3.91 – 3.82 (m, 2H), 3.78 (s, 3H), 3.69 – 3.62 (m, 1H), 3.25 – 3.20 (m, 1H), 3.12 – 3.06 (m, 1H), 1.33 (s, 9H) ppm;  $^{13}\text{C NMR}$  (101 MHz,  $\text{CDCl}_3$ )  $\delta$  164.3, 150.0, 148.8, 147.9, 137.4, 137.2, 128.8, 127.4, 126.4, 126.0, 125.2, 122.3, 121.7, 119.5, 118.9, 115.7, 109.4, 43.5, 39.6, 38.6, 34.4, 32.8, 31.50, 31.46 ppm; **HRMS** (ESI-TOF)  $m/z$ :  $[\text{M}+\text{Na}]^+$  Calcd. For  $\text{C}_{28}\text{H}_{31}\text{N}_3\text{ONa}^+$  448.2359 found 448.2379.

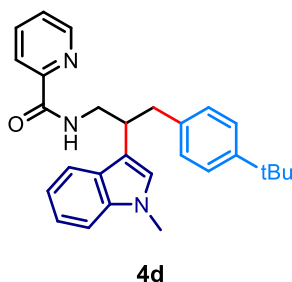

***N*-(3-(3-fluorophenyl)-2-(1-methyl-1*H*-indol-3-yl)propyl)picolinamide (4e):**

Compound **4e** was synthesized according to GP-2 as pale yellow liquid, 63% yield (61 mg); Eluent: 15-25% ethyl acetate in hexane;  $^1\text{H NMR}$  (400 MHz,  $\text{CDCl}_3$ )  $\delta$  8.47 (d,  $J = 4.8$  Hz, 1H), 8.23 (d,  $J = 7.8$  Hz, 1H), 8.16 (s, 1H), 7.89 – 7.85 (m, 1H), 7.72 (d,  $J = 8.0$  Hz, 1H), 7.44 – 7.41 (m, 1H), 7.35 (d,  $J = 8.2$  Hz, 1H), 7.29 (d,  $J = 8.4$  Hz, 1H), 7.21 – 7.13 (m, 2H), 6.96 (d,  $J = 7.7$  Hz, 1H), 6.92 (s, 1H), 6.89 – 6.83 (m, 2H), 3.95 – 3.83 (m, 2H), 3.78 (s, 3H), 3.67 – 3.60 (m, 1H), 3.25 – 3.19 (m, 1H), 3.17 – 3.12 (m, 1H) ppm;  $^{13}\text{C NMR}$  (101 MHz,  $\text{CDCl}_3$ )  $\delta$  164.3, 162.9 (d,  $J = 245.2$  Hz), 149.8, 147.8, 142.9 (d,  $J = 7.2$  Hz), 137.6, 137.5, 129.7 (d,  $J = 8.4$  Hz), 127.2, 126.6, 126.2, 124.9 (d,  $J = 3.0$  Hz), 122.5, 121.8, 119.4, 119.1, 116.1 (d,  $J = 20.9$  Hz), 114.9, 113.0 (d,  $J = 21.0$  Hz), 109.5, 43.7, 39.7, 38.9, 32.8 ppm;  $^{19}\text{F NMR}$  (471 MHz,  $\text{CDCl}_3$ )  $\delta$  -114.0 ppm; **HRMS** (ESI-TOF)  $m/z$ :  $[\text{M}+\text{H}]^+$  Calcd. For  $\text{C}_{24}\text{H}_{23}\text{FN}_3\text{O}^+$  388.1820 found 388.1834.

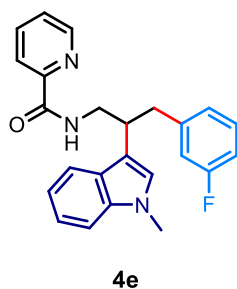

***N*-(3-(4-fluorophenyl)-2-(1-methyl-1*H*-indol-3-yl)propyl)picolinamide (4f):**

Compound **4f** was synthesized according to GP-2 as brown liquid, 61% yield (59 mg); Eluent: 15-25% ethyl acetate in hexane;  $^1\text{H NMR}$  (400 MHz,  $\text{CDCl}_3$ )  $\delta$  8.47 (d,  $J = 4.8$  Hz, 1H), 8.22 (d,  $J = 7.8$  Hz, 1H), 8.13 (s, 1H), 7.88 – 7.84 (m, 1H), 7.71 (d,  $J = 8.0$  Hz, 1H), 7.43 – 7.40 (m, 1H), 7.35 (d,  $J = 8.2$  Hz, 1H), 7.29 (d,  $J = 7.2$  Hz, 1H), 7.16 – 7.08 (m, 3H), 6.93 – 6.89 (m, 3H), 3.94 – 3.81 (m, 2H), 3.77 (s, 3H), 3.62 – 3.55 (m, 1H), 3.22 – 3.16 (m, 1H), 3.14 – 3.09 (m, 1H) ppm;  $^{13}\text{C NMR}$  (101 MHz,  $\text{CDCl}_3$ )  $\delta$  164.3, 161.5 (d,  $J = 243.5$  Hz), 149.9, 147.9, 137.6, 137.5, 135.9 (d,  $J = 3.5$  Hz), 130.5 (d,  $J = 7.8$  Hz), 127.2, 126.6, 126.2, 122.4, 121.8, 119.4, 119.0, 115.0 (d,  $J = 21.1$  Hz), 114.9, 109.5, 43.6, 39.2, 39.1, 32.8 ppm;  $^{19}\text{F NMR}$  (471 MHz,  $\text{CDCl}_3$ )  $\delta$  -117.5 ppm; **HRMS** (ESI-TOF)  $m/z$ :  $[\text{M}+\text{Na}]^+$  Calcd. For  $\text{C}_{24}\text{H}_{22}\text{FN}_3\text{ONa}^+$  410.1639 found 410.1658.

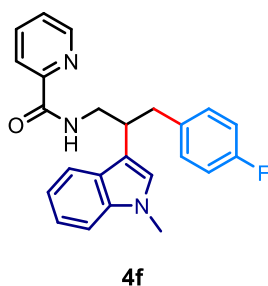

***N*-(3-(4-chlorophenyl)-2-(1-methyl-1*H*-indol-3-yl)propyl)picolinamide (4g):**

Compound **4g** was synthesized according to GP-2 as yellow sticky liquid, 63% yield (64 mg); Eluent: 15-25% ethyl acetate in hexane;  $^1\text{H NMR}$  (400 MHz,  $\text{CDCl}_3$ )  $\delta$  8.47 (d,  $J = 4.6$  Hz, 1H), 8.22 (d,  $J = 7.8$  Hz, 1H), 8.13 (s, 1H), 7.86 (t,  $J = 7.7$  Hz, 1H), 7.72 (d,  $J = 7.9$  Hz, 1H), 7.43 – 7.40 (m, 1H), 7.35 (d,  $J = 8.1$  Hz, 1H), 7.29 (d,  $J = 7.2$  Hz, 1H), 7.19 – 7.13 (m, 3H), 7.08 (d,  $J = 8.0$  Hz, 2H), 6.88 (s, 1H), 3.93 – 3.81 (m, 2H), 3.77 (s, 3H), 3.62 – 3.55 (m, 1H), 3.22 – 3.16 (m, 1H), 3.14 – 3.09 (m, 1H) ppm;  $^{13}\text{C NMR}$  (101 MHz,  $\text{CDCl}_3$ )  $\delta$  164.3, 149.9, 147.9, 138.7, 137.6, 137.5, 131.8, 130.5, 128.4, 127.2, 126.6, 126.2, 122.4, 121.8, 119.4, 119.1, 114.9, 109.5, 43.7, 39.2, 39.0, 32.9 ppm; **HRMS** (ESI-TOF)  $m/z$ :  $[\text{M}+\text{Na}]^+$  Calcd. For  $\text{C}_{24}\text{H}_{22}\text{ClN}_3\text{ONa}^+$  426.1344 found 426.1351.

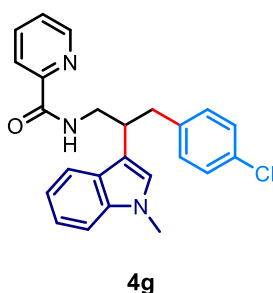

***N*-(3-(4-ethoxyphenyl)-2-(1-methyl-1*H*-indol-3-yl)propyl)picolinamide (4h):**

Compound **4h** was synthesized according to GP-2 as yellow oil, 88% yield (91 mg); Eluent: 20-30% ethyl acetate in hexane;  $^1\text{H NMR}$  (400 MHz,  $\text{CDCl}_3$ )  $\delta$  8.42 (d,  $J = 4.8$  Hz, 1H), 8.17 (d,  $J = 7.7$  Hz, 1H), 8.05 (s, 1H), 7.81 – 7.77 (m, 1H), 7.71 (d,  $J = 7.9$  Hz, 1H), 7.36 – 7.30 (m, 2H), 7.23 (d,  $J = 7.9$  Hz, 1H), 7.12 (t,  $J = 7.4$  Hz, 1H), 7.06 (d,  $J = 8.2$  Hz, 2H), 6.88 (s, 1H), 6.75 (d,  $J = 8.2$  Hz, 2H), 3.97 (q,  $J = 6.9$  Hz, 2H), 3.87 – 3.78 (m, 2H), 3.73 (s, 3H), 3.58 – 3.51 (m, 1H), 3.17 – 3.12 (m, 1H), 3.05 – 2.99 (m, 1H), 1.38 (t,  $J = 7.0$  Hz, 3H) ppm;  $^{13}\text{C NMR}$  (101 MHz,  $\text{CDCl}_3$ )  $\delta$  164.4, 157.3, 150.1, 148.0, 137.4, 137.3, 132.2, 130.1, 127.3, 126.5, 126.0, 122.2, 121.7, 119.5, 118.9, 115.4, 114.3, 109.4, 63.4, 43.4, 39.1 ( $2\times\text{C}$ ), 32.8, 15.0 ppm; **HRMS** (ESI-TOF)  $m/z$ :  $[\text{M}+\text{H}]^+$  Calcd. For  $\text{C}_{26}\text{H}_{28}\text{N}_3\text{O}_2^+$  414.2176 found 414.2179.

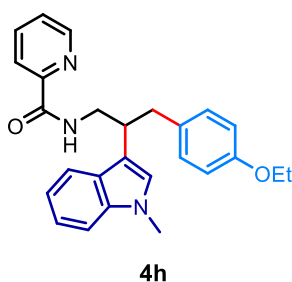

***N*-(3-(4-ethoxyphenyl)-2-(1-methyl-1*H*-indol-3-yl)propyl)isoquinoline-1-carboxamide (4h')**

Compound **4h'** was synthesized according to GP-2 as yellow oil, 85% yield (99 mg); Eluent: 20-30% ethyl acetate in hexane;  $^1\text{H NMR}$  (400 MHz,  $\text{CDCl}_3$ )  $\delta$  9.46 (d,  $J = 7.7$  Hz, 1H), 8.21 (s, 1H), 8.04 (s, 1H), 7.70 – 7.57 (m, 5H), 7.19 – 7.14 (m, 2H), 7.03 – 6.97 (m, 3H), 6.81 (s, 1H), 6.65 (d,  $J = 7.6$  Hz, 2H), 3.85 – 3.77 (m, 4H), 3.62 (s, 3H), 3.55 – 3.49 (m, 1H), 3.10 – 2.93 (m, 2H), 1.27 (t,  $J = 8.0$  Hz, 3H) ppm;  $^{13}\text{C NMR}$  (101 MHz,  $\text{CDCl}_3$ )  $\delta$  166.1, 157.2, 148.5, 140.2, 137.3 ( $2\times\text{C}$ ), 132.1, 130.4, 130.1, 128.5, 127.9, 127.2, 126.9, 126.8, 126.5, 124.1, 121.6, 119.4, 118.9, 115.4, 114.2, 109.4, 63.3, 43.4, 39.1, 39.0, 32.8, 14.9 ppm; **HRMS** (ESI-TOF)  $m/z$ :  $[\text{M}+\text{H}]^+$  Calcd. For  $\text{C}_{30}\text{H}_{30}\text{N}_3\text{O}_2^+$  464.2337 found 464.2337.

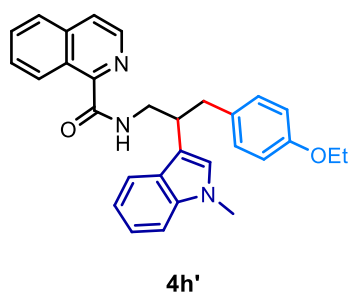

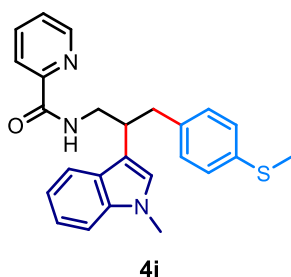

***N*-(2-(1-methyl-1*H*-indol-3-yl)-3-(4-(methylthio)phenyl)propyl)picolinamide**

**(4i):** Compound **4i** was synthesized according to GP-2 as yellow sticky liquid, 61% yield (63 mg); Eluent: 15-25% ethyl acetate in hexane;  $^1\text{H NMR}$  (400 MHz,  $\text{CDCl}_3$ )  $\delta$  8.43 – 8.41 (m, 1H), 8.16 (d,  $J = 7.8$  Hz, 1H), 8.04 (s, 1H), 7.82 – 7.78 (m, 1H), 7.69 (d,  $J = 7.9$  Hz, 1H), 7.37 – 7.34 (m, 1H), 7.31 (d,  $J = 8.2$  Hz, 1H), 7.25 – 7.21 (m, 1H), 7.12 – 7.04 (m, 5H), 6.86 (s, 1H), 3.88 – 3.77 (m, 2H), 3.73 (s, 3H), 3.58 – 3.51 (m, 1H), 3.17 – 3.12 (m, 1H), 3.07 – 3.01 (m, 1H), 2.42 (s, 3H) ppm;  $^{13}\text{C NMR}$  (101 MHz,  $\text{CDCl}_3$ )  $\delta$  164.5, 150.0, 148.1, 137.5, 137.4, 137.3, 135.6, 129.7, 127.3, 127.0, 126.6, 126.1, 122.2, 121.8, 119.5, 119.0, 115.2, 109.5, 43.6, 39.4, 39.0, 32.9, 16.3 ppm; **HRMS** (ESI-TOF)  $m/z$ :  $[\text{M}+\text{H}]^+$  Calcd. For  $\text{C}_{25}\text{H}_{26}\text{N}_3\text{OS}^+$  416.1791 found 416.1798.

***N*-(3-([1,1'-biphenyl]-4-yl)-2-(1-methyl-1*H*-indol-3-yl)propyl)picolinamide**

**(4j):** Compound **4j** was synthesized according to GP-2 as brown oil, 78% yield (87 mg); Eluent: 15-25% ethyl acetate in hexane;  $^1\text{H NMR}$  (400 MHz,  $\text{CDCl}_3$ )  $\delta$  8.39 (d,  $J = 4.5$  Hz, 1H), 8.16 (d,  $J = 7.8$  Hz, 1H), 8.06 (s, 1H), 7.81 – 7.77 (m, 1H), 7.72 (d,  $J = 7.9$  Hz, 1H), 7.54 – 7.51 (m, 2H), 7.45 – 7.38 (m, 4H), 7.35 – 7.28 (m, 3H), 7.26 – 7.21 (m, 3H), 7.13 – 7.09 (m, 1H), 6.90 (s, 1H), 3.92 – 3.80 (m, 2H), 3.73 (s, 3H), 3.66 – 3.59 (m, 1H), 3.26 – 3.21 (m, 1H), 3.15 – 3.09 (m, 1H) ppm;  $^{13}\text{C NMR}$  (101 MHz,  $\text{CDCl}_3$ )  $\delta$  164.5, 150.1, 148.1, 141.2, 139.4, 139.0, 137.5, 137.3, 129.6, 128.8 (2 $\times$ C), 127.3, 127.09, 127.07, 126.6, 126.1, 122.2, 121.8, 119.5, 119.0, 115.4, 109.5, 43.6, 39.6, 38.9, 32.9 ppm; **HRMS** (ESI-TOF)  $m/z$ :  $[\text{M}+\text{H}]^+$  Calcd. For  $\text{C}_{30}\text{H}_{28}\text{N}_3\text{O}^+$  446.2227 found 446.2233.

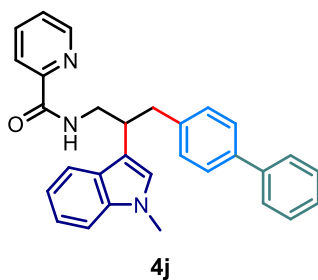

***N*-(3-(4-(allyloxy)phenyl)-2-(1-methyl-1*H*-indol-3-yl)propyl)picolinamide**

**(4k):** Compound **4k** was synthesized according to GP-2 as brown sticky liquid, 75% yield (80 mg); Eluent: 15-25% ethyl acetate in hexane;  $^1\text{H NMR}$  (400 MHz,  $\text{CDCl}_3$ )  $\delta$  8.45 (d,  $J = 4.5$  Hz, 1H), 8.21 (d,  $J = 7.8$  Hz, 1H), 8.09 (s, 1H), 7.84 – 7.80 (m, 1H), 7.74 (d,  $J = 7.9$  Hz, 1H), 7.39 – 7.34 (m, 2H), 7.30 – 7.28 (m, 1H), 7.17 – 7.13 (m, 1H), 7.10 (d,  $J = 8.1$  Hz, 2H), 6.91 (s, 1H), 6.81 (d,  $J = 8.3$  Hz, 2H), 6.12 – 6.03 (m, 1H), 5.46 – 5.28 (m, 2H), 4.52 – 4.50 (m, 2H), 3.93 – 3.82 (m, 2H), 3.76 (s, 3H), 3.62 – 3.55 (m, 1H), 3.21 – 3.16 (m, 1H), 3.09 – 3.04 (m, 1H) ppm;  $^{13}\text{C NMR}$  (101 MHz,  $\text{CDCl}_3$ )  $\delta$  164.4, 157.0, 150.1, 148.0, 137.4, 137.3, 133.6, 132.5, 130.1, 127.3, 126.5, 126.0, 122.2, 121.7, 119.5, 118.9, 117.5, 115.4, 114.6, 109.4, 68.9, 43.4, 39.1 (2 $\times$ C), 32.8 ppm; **HRMS** (ESI-TOF)  $m/z$ :  $[\text{M}+\text{H}]^+$  Calcd. For  $\text{C}_{27}\text{H}_{28}\text{N}_3\text{O}_2^+$  426.2176 found 426.2177.

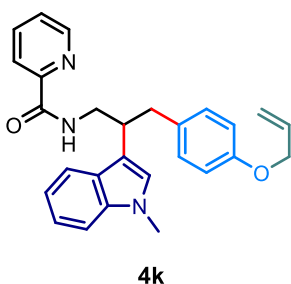

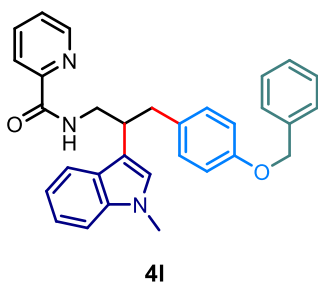

***N*-(3-(4-(benzyloxy)phenyl)-2-(1-methyl-1*H*-indol-3-yl)propyl)picolinamide**

**(4l):** Compound **4l** was synthesized according to GP-2 as brown oil, 79% yield (94 mg); Eluent: 15-25% ethyl acetate in hexane;  $^1\text{H NMR}$  (400 MHz,  $\text{CDCl}_3$ )  $\delta$  8.45 (d,  $J = 4.8$  Hz, 1H), 8.21 (d,  $J = 7.8$  Hz, 1H), 8.09 (s, 1H), 7.85 – 7.81 (m, 1H), 7.74 (d,  $J = 7.9$  Hz, 1H), 7.47 – 7.38 (m, 5H), 7.37 – 7.34 (m, 2H), 7.30 – 7.28 (m, 1H), 7.17 – 7.09 (m, 3H), 6.91 (s, 1H), 6.88 – 6.86 (m, 2H), 5.03 (s, 2H), 3.91 – 3.82 (m, 2H), 3.77 (s, 3H), 3.62 – 3.55 (m, 1H), 3.21 – 3.16 (m, 1H), 3.09 – 3.03 (m, 1H) ppm;  $^{13}\text{C NMR}$  (101 MHz,  $\text{CDCl}_3$ )  $\delta$  164.4, 157.3, 150.1, 148.1, 137.4, 137.34, 137.30, 132.6, 130.2, 128.7, 128.0, 127.6, 127.3, 126.5, 126.0, 122.2, 121.7, 119.5, 119.0, 115.4, 114.7, 109.5, 70.1, 43.4, 39.1 (2 $\times$ C), 32.8 ppm; HRMS (ESI-TOF)  $m/z$ :  $[\text{M}+\text{H}]^+$  Calcd. For  $\text{C}_{31}\text{H}_{30}\text{N}_3\text{O}_2^+$  476.2333 found 476.2337.

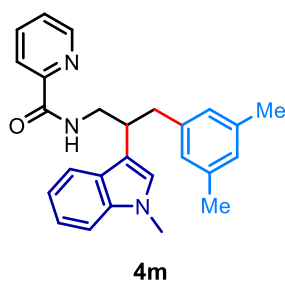

***N*-(3-(3,5-dimethylphenyl)-2-(1-methyl-1*H*-indol-3-yl)propyl)picolinamide**

**(4m):** Compound **4m** was synthesized according to GP-2 as yellow oil, 70% yield (70 mg); Eluent: 15-25% ethyl acetate in hexane;  $^1\text{H NMR}$  (400 MHz,  $\text{CDCl}_3$ )  $\delta$  8.30 (d,  $J = 4.4$  Hz, 1H), 8.06 (d,  $J = 7.8$  Hz, 1H), 7.93 (s, 1H), 7.71 – 7.63 (m, 2H), 7.26 – 7.20 (m, 2H), 7.17 – 7.12 (m, 1H), 7.05 – 7.01 (m, 1H), 6.83 (s, 1H), 6.72 – 6.69 (m, 3H), 3.74 – 3.71 (m, 2H), 3.64 (s, 3H), 3.53 – 3.46 (m, 1H), 3.08 – 3.03 (m, 1H), 2.90 – 2.84 (m, 1H), 2.14 (s, 6H) ppm;  $^{13}\text{C NMR}$  (101 MHz,  $\text{CDCl}_3$ )  $\delta$  164.3, 150.0, 147.9, 140.2, 137.8, 137.4, 137.3, 127.8, 127.4, 127.0, 126.3, 126.0, 122.2, 121.7, 119.5, 118.9, 115.8, 109.4, 43.5, 40.3, 38.7, 32.8, 21.4 ppm; HRMS (ESI-TOF)  $m/z$ :  $[\text{M}+\text{H}]^+$  Calcd. For  $\text{C}_{26}\text{H}_{28}\text{N}_3\text{O}^+$  398.2227 found 398.2232.

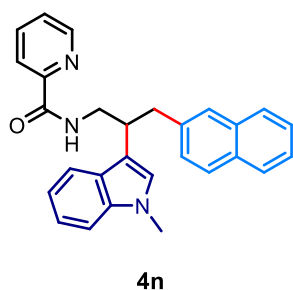

***N*-(2-(1-methyl-1*H*-indol-3-yl)-3-(naphthalen-2-yl)propyl)picolinamide (4n):**

Compound **4n** was synthesized according to GP-2 as brown sticky liquid, 72% yield (76 mg); Eluent: 15-25% ethyl acetate in hexane;  $^1\text{H NMR}$  (400 MHz,  $\text{CDCl}_3$ )  $\delta$  8.34 (d,  $J = 4.8$  Hz, 1H), 8.18 (d,  $J = 7.8$  Hz, 1H), 8.11 (s, 1H), 7.82 – 7.77 (m, 3H), 7.76 – 7.70 (m, 2H), 7.65 (s, 1H), 7.46 – 7.39 (m, 2H), 7.36 – 7.31 (m, 3H), 7.30 – 7.28 (m, 1H), 7.18 – 7.13 (m, 1H), 6.91 (s, 1H), 3.96 – 3.89 (m, 2H), 3.79 – 3.72 (m, 4H), 3.44 – 3.39 (m, 1H), 3.32 – 3.26 (m, 1H) ppm;  $^{13}\text{C NMR}$  (101 MHz,  $\text{CDCl}_3$ )  $\delta$  164.3, 149.9, 147.9, 137.9, 137.5, 137.4, 133.6, 132.2, 127.9, 127.8, 127.6 (2C), 127.5, 127.3, 126.6, 126.0, 125.9, 125.2, 122.2, 121.8, 119.5, 119.0, 115.4, 109.5, 43.8, 40.3, 38.9, 32.8 ppm; HRMS (ESI-TOF)  $m/z$ :  $[\text{M}+\text{Na}]^+$  Calcd. For  $\text{C}_{28}\text{H}_{25}\text{N}_3\text{ONa}^+$  442.1890 found 442.1907.



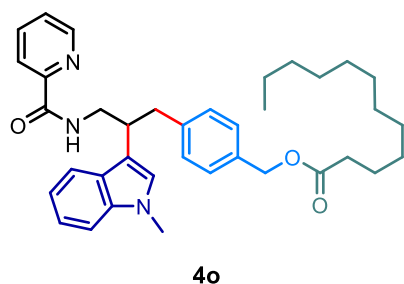

**4-(2-(1-methyl-1*H*-indol-3-yl)-3-(picolinamido)propyl)benzyl dodecanoate (4o):** Compound **4o** was synthesized according to GP-2 as yellow oil, 73% yield (106 mg); Eluent: 15-25% ethyl acetate in hexane;  $^1\text{H NMR}$  (400 MHz,  $\text{CDCl}_3$ )  $\delta$  8.34 – 8.32 (m, 1H), 8.08 (d,  $J = 7.8$  Hz, 1H), 7.97 (s, 1H), 7.72 (t,  $J = 7.9$  Hz, 1H), 7.61 (d,  $J = 8.0$  Hz, 1H), 7.29 – 7.22 (m, 2H), 7.18 – 7.15 (m, 1H), 7.12 – 7.00 (m, 5H), 6.80 (s, 1H), 4.95 (s, 2H), 3.78 – 3.69 (m, 2H), 3.65 (s, 3H), 3.54 – 3.47 (m, 1H), 3.14 – 3.08 (m, 1H), 3.03 – 2.97 (m, 1H), 2.24 (t,  $J = 7.3$  Hz, 2H), 1.56 – 1.51 (m, 2H), 1.21 – 1.17 (m, 16H), 0.80 (t,  $J = 5.9$  Hz, 3H) ppm;  $^{13}\text{C NMR}$  (101 MHz,  $\text{CDCl}_3$ )  $\delta$  173.9, 164.4, 150.0, 148.1, 140.3, 137.4, 137.3, 133.8, 129.3, 128.3, 127.3, 126.5, 126.1, 122.2, 121.8, 119.4, 119.0, 115.2, 109.5, 66.1, 43.5, 39.6, 38.8, 34.5, 32.8, 32.0, 29.7 (2 $\times$ C), 29.6, 29.45, 29.36, 29.3, 25.1, 22.8, 14.2 ppm; **HRMS** (ESI-TOF)  $m/z$ :  $[\text{M}+\text{Na}]^+$  Calcd. For  $\text{C}_{37}\text{H}_{47}\text{N}_3\text{O}_3\text{Na}^+$  604.3510 found 604.3527.

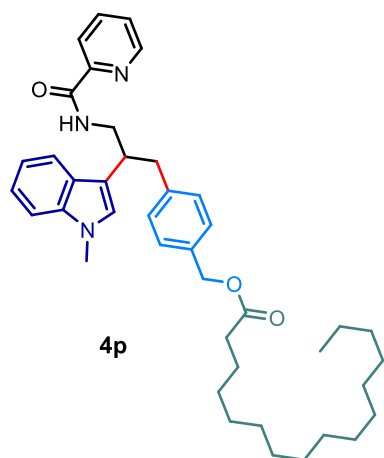

**4-(2-(1-methyl-1*H*-indol-3-yl)-3-(picolinamido)propyl)benzyl palmitate (4p):** Compound **4p** was synthesized according to GP-2 as yellow oil, 70% yield (112 mg); Eluent: 15-25% ethyl acetate in hexane;  $^1\text{H NMR}$  (400 MHz,  $\text{CDCl}_3$ )  $\delta$  8.33 (d,  $J = 4.3$  Hz, 1H), 8.09 (d,  $J = 7.5$  Hz, 1H), 7.98 (s, 1H), 7.72 (t,  $J = 7.7$  Hz, 1H), 7.61 (d,  $J = 7.7$  Hz, 1H), 7.30 – 7.22 (m, 2H), 7.16 – 7.01 (m, 6H), 6.80 (s, 1H), 4.95 (s, 2H), 3.79 – 3.71 (m, 2H), 3.66 (s, 3H), 3.52 – 3.47 (m, 1H), 3.14 – 3.09 (m, 1H), 3.04 – 2.98 (m, 1H), 2.27 – 2.23 (m, 2H), 1.56 – 1.51 (m, 2H), 1.21 – 1.18 (m, 24H), 0.80 (t,  $J = 6.0$  Hz, 3H) ppm;  $^{13}\text{C NMR}$  (101 MHz,  $\text{CDCl}_3$ )  $\delta$  173.9, 164.4, 150.0, 148.1, 140.3, 137.4, 137.3, 133.8, 129.4, 128.3, 127.3, 126.5, 126.1, 122.2, 121.8, 119.4, 119.0, 115.2, 109.5, 66.1, 43.5, 39.6, 38.8, 34.5, 32.9, 32.0, 29.82 (3 $\times$ C), 29.78 (2 $\times$ C), 29.7, 29.6, 29.5, 29.4, 29.3, 25.1, 22.8, 14.3 ppm; **HRMS** (ESI-TOF)  $m/z$ :  $[\text{M}+\text{Na}]^+$  Calcd. For  $\text{C}_{41}\text{H}_{55}\text{N}_3\text{O}_3\text{Na}^+$  660.4136 found 660.4156.

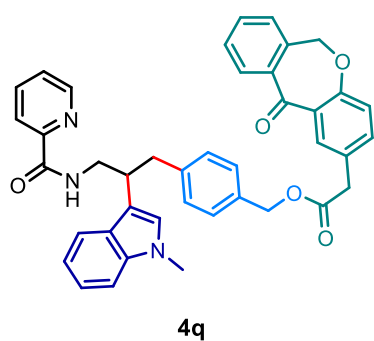

**4-(2-(1-methyl-1*H*-indol-3-yl)-3-(picolinamido)propyl)benzyl 2-(11-oxo-6,11-dihydrodibenzo[*b,e*]oxepin-2-yl)acetate (4q):** Compound **4q** was synthesized according to GP-2 as yellow sticky liquid, 86% yield (140 mg); Eluent: 20-30% ethyl acetate in hexane;  $^1\text{H NMR}$  (400 MHz,  $\text{CDCl}_3$ )  $\delta$  8.33 (d,  $J = 4.7$  Hz, 1H), 8.09 (d,  $J = 7.9$  Hz, 1H), 8.05 – 8.01 (m, 2H), 7.80 (d,  $J = 7.7$  Hz, 1H), 7.74 (t,  $J = 7.8$  Hz, 1H), 7.60 (d,  $J = 7.9$  Hz, 1H), 7.46 (t,  $J = 7.4$  Hz, 1H), 7.40 – 7.32 (m, 2H), 7.29 – 7.26 (m, 2H), 7.22 (d,  $J = 8.3$  Hz, 1H), 7.18 – 7.17 (m, 1H), 7.14 (d,  $J = 8.1$  Hz, 1H), 7.10 – 7.06 (m, 3H), 7.04 – 7.00 (m, 1H), 6.93 (d,  $J = 8.4$  Hz, 1H), 6.80 (s, 1H), 5.09 (s, 2H), 4.98 (s, 2H), 3.78 – 3.69 (m, 2H), 3.65 (s, 3H), 3.58 (s,

2H), 3.53 – 3.47 (m, 1H), 3.13 – 3.08 (m, 1H), 3.03 – 2.98 (m, 1H) ppm;  $^{13}\text{C}$  NMR (101 MHz,  $\text{CDCl}_3$ )  $\delta$  191.0, 171.4, 164.2, 160.6, 149.8, 147.8, 140.6, 140.5, 137.6, 137.4, 136.5, 135.6, 133.4, 132.9, 132.6, 129.6, 129.38, 129.36, 128.4, 127.9, 127.8, 127.2, 126.6, 126.2, 125.2, 122.4, 121.8, 121.2, 119.4, 119.0, 115.1, 109.5, 73.7, 66.8, 43.6, 40.3, 39.6, 38.8, 32.9 ppm; HRMS (ESI-TOF)  $m/z$ :  $[\text{M}+\text{H}]^+$  Calcd. For  $\text{C}_{41}\text{H}_{36}\text{N}_3\text{O}_5^+$  650.2649 found 650.2660.

**4-(2-(1-methyl-1H-indol-3-yl)-3-(picolinamido)propyl)benzyl 5-(2,5-dimethylphenoxy)-2,2-dimethylpentanoate (4r):** Compound **4r** was

synthesized according to GP-2 as yellow sticky liquid, 80% yield (126 mg); Eluent: 15-25% ethyl acetate in hexane;  $^1\text{H}$  NMR (400 MHz,  $\text{CDCl}_3$ )  $\delta$  8.34 – 8.32 (m, 1H), 8.08 (d,  $J = 7.8$  Hz, 1H), 7.97 (s, 1H), 7.71 (t,  $J = 7.9$  Hz, 1H), 7.60 (d,  $J = 7.9$  Hz, 1H), 7.29 – 7.21 (m, 2H), 7.17 – 7.13 (m, 1H), 7.10 – 7.00 (m, 5H), 6.90 (d,  $J = 7.4$  Hz, 1H), 6.79 (d,  $J = 2.2$  Hz, 1H), 6.56 (d,  $J = 7.6$  Hz, 1H), 6.50 (s, 1H), 4.95 (s, 2H), 3.80 – 3.71 (m, 4H), 3.64 (s, 3H), 3.53 – 3.45 (m, 1H), 3.12 – 3.07 (m, 1H), 3.02 – 2.96 (m, 1H), 2.21 (s, 3H), 2.06 (s, 3H), 1.64 – 1.63 (m, 4H), 1.14 (s, 6H) ppm;  $^{13}\text{C}$  NMR (101 MHz,  $\text{CDCl}_3$ )  $\delta$  177.8, 164.4, 157.0, 150.0, 148.0, 140.2, 137.4, 137.3, 136.5, 134.0, 130.4, 129.3, 127.9, 127.3, 126.5, 126.1, 123.7, 122.2, 121.8, 120.7, 119.4, 119.0, 115.2, 112.0, 109.5, 68.0, 66.1, 43.5, 42.2, 39.6, 38.9, 37.2, 32.8, 25.3, 25.2, 21.5, 15.9 ppm; HRMS (ESI-TOF)  $m/z$ :  $[\text{M}+\text{Na}]^+$  Calcd. For  $\text{C}_{40}\text{H}_{45}\text{N}_3\text{O}_4\text{Na}^+$  654.3302 found 654.3324.

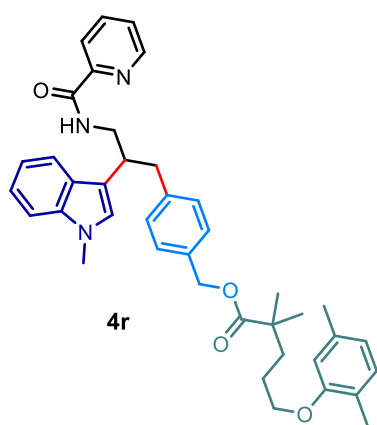

**4-(2-(1-methyl-1H-indol-3-yl)-3-(picolinamido)propyl)benzyl 2-(4-isobutylphenyl)propanoate (4s):** Compound **4s** was synthesized according to GP-2 as

brown liquid, 73% yield (107 mg); Eluent: 20-30% ethyl acetate in hexane;  $^1\text{H}$  NMR (400 MHz,  $\text{CDCl}_3$ )  $\delta$  8.33 – 8.32 (m, 2H), 8.08 (d,  $J = 7.8$  Hz, 2H), 7.96 (s, 2H), 7.71 (t,  $J = 7.6$  Hz, 2H), 7.60 (d,  $J = 8.0$  Hz, 2H), 7.28 – 7.22 (m, 4H), 7.17 – 7.10 (m, 6H), 7.04 – 6.98 (m, 14H), 6.79 (s, 2H), 4.99 – 4.88 (m, 4H), 3.78 – 3.70 (m, 4H), 3.67 – 3.64 (m, 8H), 3.52 – 3.45 (m, 2H), 3.12 – 3.06 (m, 2H), 3.01 – 2.95 (m, 2H), 2.36 (d,  $J = 7.0$  Hz, 4H), 1.79 – 1.72 (m, 2H), 1.41 (d,  $J = 7.0$  Hz, 6H), 0.81 (d,  $J = 6.4$  Hz, 12H) ppm;  $^{13}\text{C}$  NMR (101 MHz,  $\text{CDCl}_3$ )  $\delta$  174.7 (2 $\times$ C), 164.4 (2 $\times$ C), 150.0 (2 $\times$ C), 148.1 (2 $\times$ C), 140.6 (2 $\times$ C), 140.2 (2 $\times$ C), 137.8 (2 $\times$ C), 137.4 (2 $\times$ C), 137.3 (2 $\times$ C), 133.8 (2 $\times$ C), 129.4 (2 $\times$ C), 129.3 (2 $\times$ C), 127.9 (2 $\times$ C), 127.3 (2 $\times$ C), 127.2 (2 $\times$ C), 126.5 (2 $\times$ C), 126.1 (2 $\times$ C), 122.2 (2 $\times$ C), 121.8 (2 $\times$ C), 119.4 (2 $\times$ C), 119.0 (2 $\times$ C), 115.2 (2 $\times$ C), 109.5 (2 $\times$ C), 66.3 (2 $\times$ C), 45.2 (2 $\times$ C), 45.1 (2 $\times$ C), 43.5 (2 $\times$ C), 39.6 (2 $\times$ C), 38.9, 38.8, 32.8 (2 $\times$ C), 30.3 (2 $\times$ C), 22.5

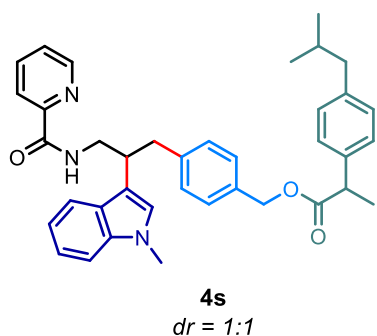

(2×C), 18.6 (2×C) ppm; **HRMS** (ESI-TOF) *m/z*: [M+Na]<sup>+</sup> Calcd. For C<sub>38</sub>H<sub>41</sub>N<sub>3</sub>O<sub>3</sub>Na<sup>+</sup> 610.3040 found 610.3059.

**4-(2-(1-methyl-1*H*-indol-3-yl)-3-(picolinamido)propyl)benzyl (2*S*)-2-(6-methoxynaphthalen-2-yl)propanoate (4t):** Compound **4t** was synthesized

according to GP-2 as yellow sticky liquid, 75% yield (115 mg); Eluent: 15-25% ethyl acetate in hexane; <sup>1</sup>H NMR (400 MHz, CDCl<sub>3</sub>) δ 8.29 (d, *J* = 4.8 Hz, 2H), 8.06 (d, *J* = 7.9 Hz, 2H), 7.96 (s, 2H), 7.68 (t, *J* = 7.7 Hz, 2H), 7.60 – 7.55 (m, 8H), 7.29 (d, *J* = 8.5 Hz, 2H), 7.24 – 7.19 (m, 4H), 7.15 – 7.13 (m, 2H), 7.04 – 6.99 (m, 14H), 6.75 (s, 2H), 5.00 – 4.87 (m, 4H), 3.82 – 3.78 (m, 8H), 3.74 – 3.65 (m, 4H), 3.60 (s, 6H), 3.50 – 3.45 (m, 2H), 3.09 – 3.04 (m, 2H), 2.99 – 2.94 (m, 2H), 1.48 (d, *J* = 7.1 Hz, 6H) ppm; <sup>13</sup>C NMR (101 MHz, CDCl<sub>3</sub>) δ 174.6 (2×C), 164.4 (2×C), 157.7 (2×C), 150.0 (2×C), 148.0 (2×C), 140.2 (2×C), 137.4 (2×C), 137.3 (2×C), 135.7 (2×C), 133.7 (2×C), 133.6 (2×C), 129.4 (2×C), 129.2 (2×C), 129.0 (4×C), 128.1 (2×C), 127.2 (2×C), 126.5 (2×C), 126.4 (4×C), 126.1 (2×C), 122.2 (2×C), 121.7 (2×C), 119.4 (2×C), 119.02 (2×C), 118.95 (2×C), 115.1 (2×C), 109.5 (2×C), 105.6 (2×C), 66.5 (2×C), 55.4 (2×C), 45.5 (2×C), 43.5 (2×C), 39.5 (2×C), 38.81, 38.76, 32.8 (2×C), 18.6 (2×C) ppm; **HRMS** (ESI-TOF) *m/z*: [M+H]<sup>+</sup> Calcd. For C<sub>39</sub>H<sub>38</sub>N<sub>3</sub>O<sub>4</sub><sup>+</sup> 612.2857 found 612.2860.

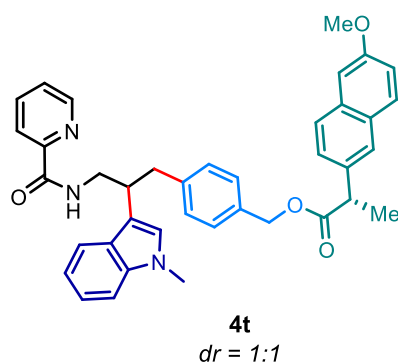

**4-(2-(1-methyl-1*H*-indol-3-yl)-3-(picolinamido)propyl)benzyl 2-propylpenta-**

**noate (4u):** Compound **4u** was synthesized according to GP-2 as yellow oil, 82% yield (108 mg); Eluent: 15-25% ethyl acetate in hexane; <sup>1</sup>H NMR (400 MHz, CDCl<sub>3</sub>) δ 8.33 (d, *J* = 4.7 Hz, 1H), 8.08 (d, *J* = 7.8 Hz, 1H), 7.97 (s, 1H), 7.71 (t, *J* = 7.6 Hz, 1H), 7.61 (d, *J* = 7.9 Hz, 1H), 7.28 – 7.25 (m, 1H), 7.22 (d, *J* = 8.2 Hz, 1H), 7.17 – 7.13 (m, 1H), 7.11 – 7.00 (m, 5H), 6.79 (s, 1H), 4.95 (s, 2H), 3.80 – 3.70 (m, 2H), 3.64 (s, 3H), 3.54 – 3.47 (m, 1H), 3.14 – 3.08 (m, 1H), 3.03 – 2.98 (m, 1H), 2.35 – 2.28 (m, 1H), 1.57 – 1.47 (m, 2H), 1.37 – 1.29 (m, 2H), 1.23 – 1.14 (m, 4H), 0.79 (t, *J* = 7.3 Hz, 6H) ppm; <sup>13</sup>C NMR (101 MHz, CDCl<sub>3</sub>) δ 176.6, 164.4, 150.0, 148.0, 140.2, 137.4, 137.3, 134.0, 129.3, 128.1, 127.3, 126.5, 126.1, 122.2, 121.8, 119.4, 119.0, 115.2, 109.5, 65.9, 45.4, 43.5, 39.6, 38.9, 34.7, 32.8, 20.7, 14.1 ppm; **HRMS** (ESI-TOF) *m/z*: [M+Na]<sup>+</sup> Calcd. For C<sub>33</sub>H<sub>39</sub>N<sub>3</sub>O<sub>3</sub>Na<sup>+</sup> 548.2884 found 548.2901.

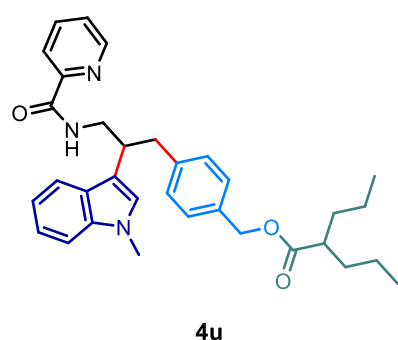

***N*-2-(1,4-dimethyl-1*H*-indol-3-yl)-3-(*p*-tolyl)propylpicolinamide (5a):**

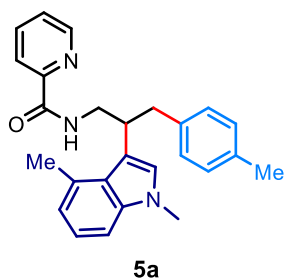

Compound **5a** was synthesized according to GP-2 as brown oil, 73% yield (73 mg); Eluent: 15-25% ethyl acetate in hexane;  $^1\text{H NMR}$  (400 MHz,  $\text{CDCl}_3$ )  $\delta$  8.43 – 8.42 (m, 1H), 8.16 (d,  $J = 8.0$  Hz, 1H), 8.08 (s, 1H), 7.80 (t,  $J = 7.6$  Hz, 1H), 7.38 – 7.34 (m, 1H), 7.18 – 7.12 (m, 2H), 7.10 – 7.05 (m, 4H), 6.97 (s, 1H), 6.86 (d,  $J = 6.6$  Hz, 1H), 4.03 – 3.96 (m, 1H), 3.82 – 3.69 (m, 5H), 3.21 – 3.16 (m, 1H), 2.94 – 2.89 (m, 1H), 2.78 (s, 3H), 2.29 (s, 3H) ppm;  $^{13}\text{C NMR}$  (101 MHz,  $\text{CDCl}_3$ )  $\delta$  164.4, 150.1, 148.0, 137.5, 137.3, 136.8, 135.6, 131.0, 129.1 (2 $\times$ C), 126.2, 126.1, 126.0, 122.2, 121.6, 121.1, 117.0, 107.4, 43.9, 41.3, 38.5, 33.0, 21.1 (2 $\times$ C) ppm; **HRMS** (ESI-TOF)  $m/z$ :  $[\text{M}+\text{H}]^+$  Calcd. For  $\text{C}_{26}\text{H}_{28}\text{N}_3\text{O}^+$  398.2227 found 398.2239.

***N*-2-(4-methoxy-1-methyl-1*H*-indol-3-yl)-3-(*p*-tolyl)propylpicolinamide (5b):**

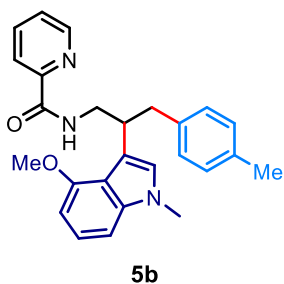

Compound **5b** was synthesized according to GP-2 as yellow liquid, 75% yield (78 mg); Eluent: 20-30% ethyl acetate in hexane;  $^1\text{H NMR}$  (400 MHz,  $\text{CDCl}_3$ )  $\delta$  8.41 (d,  $J = 4.8$  Hz, 1H), 8.19 – 8.13 (m, 2H), 7.79 – 7.75 (m, 1H), 7.35 – 7.31 (m, 1H), 7.16 – 7.11 (m, 3H), 7.07 – 7.06 (m, 2H), 6.91 (d,  $J = 8.3$  Hz, 1H), 6.82 (s, 1H), 6.53 (d,  $J = 7.8$  Hz, 1H), 3.98 – 3.91 (m, 4H), 3.80 – 3.77 (m, 2H), 3.69 (s, 3H), 3.28 – 3.23 (m, 1H), 2.92 – 2.87 (m, 1H), 2.30 (s, 3H) ppm;  $^{13}\text{C NMR}$  (101 MHz,  $\text{CDCl}_3$ )  $\delta$  164.3, 154.7, 150.3, 147.9, 139.0, 137.7, 137.2, 135.3, 129.2, 129.0, 125.8, 124.9, 122.4, 122.2, 117.5, 116.7, 102.8, 99.2, 55.2, 43.9, 40.5, 39.0, 33.0, 21.1 ppm; **HRMS** (ESI-TOF)  $m/z$ :  $[\text{M}+\text{Na}]^+$  Calcd. For  $\text{C}_{26}\text{H}_{27}\text{N}_3\text{O}_2\text{Na}^+$  436.1995 found 436.2003.

***N*-2-(5-methoxy-1-methyl-1*H*-indol-3-yl)-3-(*p*-tolyl)propylpicolinamide (5c):**

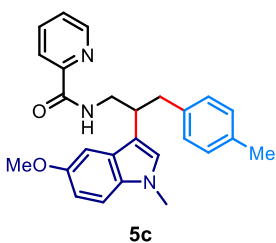

Compound **5c** was synthesized according to GP-2 as yellow oil, 82% yield (85 mg); Eluent: 20-30% ethyl acetate in hexane;  $^1\text{H NMR}$  (400 MHz,  $\text{CDCl}_3$ )  $\delta$  8.41 (d,  $J = 4.6$  Hz, 1H), 8.17 (d,  $J = 7.8$  Hz, 1H), 8.07 (s, 1H), 7.79 (t,  $J = 7.7$  Hz, 1H), 7.36 – 7.33 (m, 1H), 7.19 (d,  $J = 8.8$  Hz, 1H), 7.08 – 7.02 (m, 5H), 6.90 – 6.88 (m, 2H), 3.89 – 3.83 (m, 1H), 3.80 – 3.73 (m, 4H), 3.71 (s, 3H), 3.56 – 3.49 (m, 1H), 3.16 – 3.11 (m, 1H), 3.07 – 3.01 (m, 1H), 2.28 (s, 3H) ppm;  $^{13}\text{C NMR}$  (101 MHz,  $\text{CDCl}_3$ )  $\delta$  164.4, 153.7, 150.1, 148.0, 137.3, 137.2, 135.5, 132.7, 129.1, 129.0, 127.7, 126.9, 126.0, 122.2, 115.1, 111.9, 110.1, 101.3, 56.0, 43.7, 39.5, 38.8, 33.0, 21.1 ppm; **HRMS** (ESI-TOF)  $m/z$ :  $[\text{M}+\text{Na}]^+$  Calcd. For  $\text{C}_{26}\text{H}_{27}\text{N}_3\text{O}_2\text{Na}^+$  436.1995 found 436.2012.

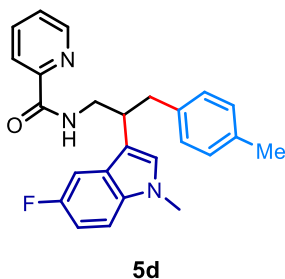

***N*-(2-(5-fluoro-1-methyl-1*H*-indol-3-yl)-3-(*p*-tolyl)propyl)picolinamide (5d):**

Compound **5d** was synthesized according to GP-2 as yellow oil, 65% yield (65 mg); Eluent: 20-30% ethyl acetate in hexane;  $^1\text{H NMR}$  (400 MHz,  $\text{CDCl}_3$ )  $\delta$  8.43 – 8.41 (m, 1H), 8.16 (dd,  $J = 7.7, 2.2$  Hz, 1H), 8.05 (s, 1H), 7.80 (t,  $J = 7.7$  Hz, 1H), 7.38 – 7.34 (m, 1H), 7.31 – 7.28 (m, 1H), 7.21 – 7.17 (m, 1H), 7.06 – 7.01 (m, 4H), 6.98 – 6.93 (m, 2H), 3.86 – 3.76 (m, 2H), 3.71 (s, 3H), 3.53 – 3.45 (m, 1H), 3.14 – 3.08 (m, 1H), 3.05 – 2.99 (m, 1H), 2.27 (s, 3H) ppm;  $^{13}\text{C NMR}$  (101 MHz,  $\text{CDCl}_3$ )  $\delta$  164.4, 157.6 (d,  $J = 233.9$  Hz), 150.0, 148.1, 137.3, 136.9, 135.6, 134.0, 129.1, 129.0, 128.0, 127.6 (d,  $J = 9.7$  Hz), 126.1, 122.2, 115.5 (d,  $J = 4.6$  Hz), 110.1 (d,  $J = 6.1$  Hz), 109.9 (d,  $J = 10.9$  Hz), 104.4 (d,  $J = 23.7$  Hz), 43.6, 39.4, 38.9, 33.1, 21.1 ppm;  $^{19}\text{F NMR}$  (471 MHz,  $\text{CDCl}_3$ )  $\delta$  -125.5 ppm; **HRMS** (ESI-TOF)  $m/z$ :  $[\text{M}+\text{H}]^+$  Calcd. For  $\text{C}_{25}\text{H}_{25}\text{FN}_3\text{O}^+$  402.1976 found 402.1985.

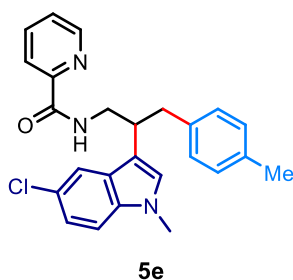

***N*-(2-(5-chloro-1-methyl-1*H*-indol-3-yl)-3-(*p*-tolyl)propyl)picolinamide (5e):**

Compound **5e** was synthesized according to GP-2 as brown oil, 68% yield (71 mg); Eluent: 15-25% ethyl acetate in hexane;  $^1\text{H NMR}$  (400 MHz,  $\text{CDCl}_3$ )  $\delta$  8.42 (d,  $J = 4.7$  Hz, 1H), 8.17 (d,  $J = 7.7$  Hz, 1H), 8.06 (s, 1H), 7.83 – 7.79 (m, 1H), 7.57 (d,  $J = 8.4$  Hz, 1H), 7.38 – 7.35 (m, 1H), 7.27 (s, 1H), 7.05 – 7.01 (m, 5H), 6.87 (s, 1H), 3.85 – 3.74 (m, 2H), 3.68 (s, 3H), 3.57 – 3.51 (m, 1H), 3.13 – 3.08 (m, 1H), 3.06 – 3.03 (m, 1H), 2.27 (s, 3H) ppm;  $^{13}\text{C NMR}$  (101 MHz,  $\text{CDCl}_3$ )  $\delta$  164.3, 149.9, 147.9, 137.8, 137.5, 136.9, 135.6, 129.1, 129.0, 127.8, 127.1, 126.1, 126.0, 122.3, 120.4, 119.6, 115.9, 109.5, 43.8, 39.5, 38.8, 32.9, 21.1 ppm; **HRMS** (ESI-TOF)  $m/z$ :  $[\text{M}+\text{Na}]^+$  Calcd. For  $\text{C}_{25}\text{H}_{24}\text{ClN}_3\text{ONa}^+$  440.1500 found 440.1519.

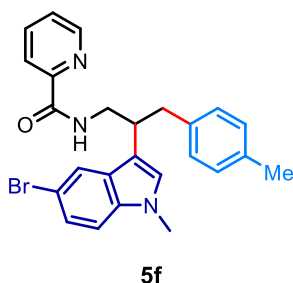

***N*-(2-(5-bromo-1-methyl-1*H*-indol-3-yl)-3-(*p*-tolyl)propyl)picolinamide (5f):**

Compound **5f** was synthesized according to GP-2 as brown oil, 65% yield (75 mg); Eluent: 15-25% ethyl acetate in hexane;  $^1\text{H NMR}$  (400 MHz,  $\text{CDCl}_3$ )  $\delta$  8.42 – 8.40 (m, 1H), 8.14 (d,  $J = 7.7$  Hz, 1H), 8.02 (s, 1H), 7.80 – 7.76 (m, 1H), 7.68 (s, 1H), 7.35 – 7.32 (m, 1H), 7.24 (s, 1H), 7.12 (d,  $J = 8.7$  Hz, 1H), 7.02 – 7.00 (m, 4H), 6.86 (s, 1H), 3.85 – 3.78 (m, 1H), 3.73 – 3.68 (m, 4H), 3.51 – 3.43 (m, 1H), 3.09 – 2.97 (m, 2H), 2.25 (s, 3H) ppm;  $^{13}\text{C NMR}$  (101 MHz,  $\text{CDCl}_3$ )  $\delta$  164.4, 149.9, 148.1, 137.3, 136.8, 136.0, 135.7, 129.13, 129.08, 129.0, 127.6, 126.1, 124.5, 122.2, 122.0, 115.3, 112.4, 110.9, 43.7, 39.6, 38.8, 33.0, 21.1 ppm; **HRMS** (ESI-TOF)  $m/z$ :  $[\text{M}+\text{H}]^+$  Calcd. For  $\text{C}_{25}\text{H}_{25}\text{BrN}_3\text{O}^+$  462.1176 found 462.1181.

***N*-(2-(6-methoxy-1-methyl-1*H*-indol-3-yl)-3-(*p*-tolyl)propyl)picolinamide**

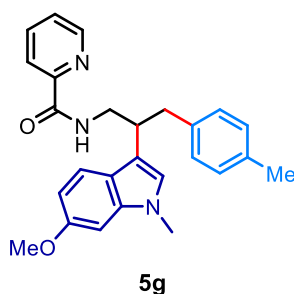

**(5g):** Compound **5g** was synthesized according to GP-2 as brown oil, 85% yield (88 mg); Eluent: 20-30% ethyl acetate in hexane;  $^1\text{H NMR}$  (400 MHz,  $\text{CDCl}_3$ )  $\delta$  8.43 – 8.41 (m, 1H), 8.16 (d,  $J = 7.8$  Hz, 1H), 8.05 (s, 1H), 7.81 – 7.77 (m, 1H), 7.57 (d,  $J = 8.4$  Hz, 1H), 7.36 – 7.33 (m, 1H), 7.07 – 7.01 (m, 4H), 6.80 – 6.76 (m, 3H), 3.88 (s, 3H), 3.84 – 3.81 (m, 1H), 3.80 – 3.75 (m, 1H), 3.68 (s, 3H), 3.55 – 3.48 (m, 1H), 3.17 – 3.12 (m, 1H), 3.05 – 2.99 (m, 1H), 2.28 (s, 3H) ppm;  $^{13}\text{C NMR}$  (101 MHz,  $\text{CDCl}_3$ )  $\delta$  164.3, 156.5, 150.1, 148.0, 138.1, 137.3, 137.2, 135.5, 129.0 (2 $\times$ C), 126.0, 125.3, 122.2, 121.7, 120.1, 115.6, 108.8, 93.1, 55.8, 43.6, 39.6, 39.0, 32.8, 21.1 ppm; **HRMS** (ESI-TOF)  $m/z$ :  $[\text{M}+\text{H}]^+$  Calcd. For  $\text{C}_{26}\text{H}_{28}\text{N}_3\text{O}_2^+$  414.2176 found 414.2187.

***N*-(2-(6-fluoro-1-methyl-1*H*-indol-3-yl)-3-(*p*-tolyl)propyl)picolinamide (5h):**

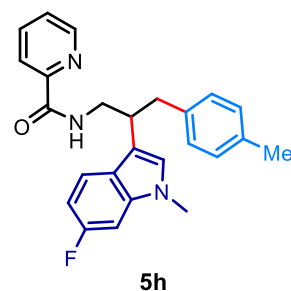

Compound **5h** was synthesized according to GP-2 as yellow oil, 66% yield (66 mg); Eluent: 20-30% ethyl acetate in hexane;  $^1\text{H NMR}$  (400 MHz,  $\text{CDCl}_3$ )  $\delta$  8.42 (s, 1H), 8.16 (d,  $J = 7.5$  Hz, 1H), 8.05 (s, 1H), 7.80 (t,  $J = 7.5$  Hz, 1H), 7.60 – 7.56 (m, 1H), 7.38 – 7.34 (m, 1H), 7.09 – 7.01 (m, 4H), 6.96 (d,  $J = 9.5$  Hz, 1H), 6.88 – 6.82 (m, 2H), 3.85 – 3.73 (m, 2H), 3.67 (s, 3H), 3.57 – 3.50 (m, 1H), 3.15 – 3.09 (m, 1H), 3.06 – 3.00 (m, 1H), 2.27 (s, 3H) ppm;  $^{13}\text{C NMR}$  (101 MHz,  $\text{CDCl}_3$ )  $\delta$  164.4, 160.0 (d,  $J = 237.4$  Hz), 150.0, 148.0, 137.3 (2 $\times$ C), 137.0, 135.6, 129.1, 129.0, 126.6 (d,  $J = 3.8$  Hz), 126.1, 123.9, 122.2, 120.2 (d,  $J = 10.0$  Hz), 115.9, 107.6 (d,  $J = 24.5$  Hz), 95.8 (d,  $J = 26.0$  Hz), 43.7, 39.5, 38.8, 32.9, 21.1 ppm;  $^{19}\text{F NMR}$  (471 MHz,  $\text{CDCl}_3$ )  $\delta$  -121.0 ppm; **HRMS** (ESI-TOF)  $m/z$ :  $[\text{M}+\text{H}]^+$  Calcd. For  $\text{C}_{25}\text{H}_{25}\text{FN}_3\text{O}^+$  402.1976 found 402.1983.

***N*-(2-(6-chloro-1-methyl-1*H*-indol-3-yl)-3-(*p*-tolyl)propyl)picolinamide (5i):**

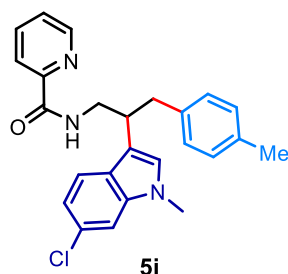

Compound **5i** was synthesized according to GP-2 as brown oil, 63% yield (66 mg); Eluent: 20-30% ethyl acetate in hexane;  $^1\text{H NMR}$  (400 MHz,  $\text{CDCl}_3$ )  $\delta$  8.41 (s, 1H), 8.15 (d,  $J = 5.7$  Hz, 1H), 8.03 (s, 1H), 7.79 (t,  $J = 8.1$  Hz, 1H), 7.56 (d,  $J = 7.9$  Hz, 1H), 7.35 (s, 1H), 7.25 (s, 1H), 7.04 – 7.00 (m, 5H), 6.85 (s, 1H), 3.84 – 3.71 (m, 2H), 3.67 (s, 3H), 3.55 – 3.49 (m, 1H), 3.12 – 2.99 (m, 2H), 2.26 (s, 3H) ppm;  $^{13}\text{C NMR}$  (101 MHz,  $\text{CDCl}_3$ )  $\delta$  164.4, 149.9, 148.1, 137.8, 137.3, 136.9, 135.6, 129.1, 129.0, 127.8, 127.1, 126.1, 125.9, 122.2, 120.4, 119.6, 115.8, 109.5, 43.7, 39.5, 38.8, 32.9, 21.1 ppm; **HRMS** (ESI-TOF)  $m/z$ :  $[\text{M}+\text{Na}]^+$  Calcd. For  $\text{C}_{25}\text{H}_{24}\text{ClN}_3\text{ONa}^+$  440.1500 found 440.1506.

***N*-(2-(6-bromo-1-methyl-1*H*-indol-3-yl)-3-(*p*-tolyl)propyl)picolinamide (**5j**):**

Compound **5j** was synthesized according to GP-2 as brown oil, 62% yield (72 mg); Eluent: 20-30% ethyl acetate in hexane;  $^1\text{H NMR}$  (400 MHz,  $\text{CDCl}_3$ )  $\delta$  8.42 (d,  $J = 4.8$  Hz, 1H), 8.16 (d,  $J = 7.8$  Hz, 1H), 8.04 (s, 1H), 7.83 – 7.78 (m, 1H), 7.53 (d,  $J = 8.5$  Hz, 1H), 7.44 (s, 1H), 7.39 – 7.34 (m, 1H), 7.17 (dd,  $J = 8.5, 1.8$  Hz, 1H), 7.04 – 6.97 (m, 4H), 6.85 (s, 1H), 3.85 – 3.74 (m, 2H), 3.68 (s, 3H), 3.56 – 3.49 (m, 1H), 3.13 – 3.00 (m, 2H), 2.27 (s, 3H) ppm;  $^{13}\text{C NMR}$  (101 MHz,  $\text{CDCl}_3$ )  $\delta$  164.4, 150.0, 148.0, 138.2, 137.4, 136.9, 135.6, 129.1, 129.0, 127.1, 126.3, 126.1, 122.3, 122.2, 120.7, 115.9, 115.4, 112.5, 43.7, 39.5, 38.8, 32.9, 21.1 ppm; **HRMS** (ESI-TOF)  $m/z$ :  $[\text{M}+\text{H}]^+$  Calcd. For  $\text{C}_{25}\text{H}_{25}\text{BrN}_3\text{O}^+$  462.1176 found 462.1185.

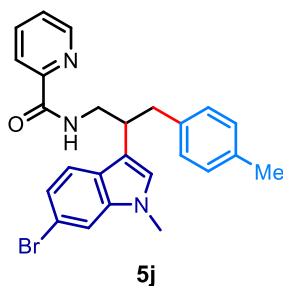

***N*-(2-(1,7-dimethyl-1*H*-indol-3-yl)-3-(*p*-tolyl)propyl)picolinamide (**5k**):**

Compound **5k** was synthesized according to GP-2 as brown oil, 81% yield (81 mg); Eluent: 15-25% ethyl acetate in hexane;  $^1\text{H NMR}$  (400 MHz,  $\text{CDCl}_3$ )  $\delta$  8.43 (d,  $J = 4.1$  Hz, 1H), 8.18 (d,  $J = 7.7$  Hz, 1H), 8.07 (s, 1H), 7.80 (t,  $J = 7.7$  Hz, 1H), 7.57 (d,  $J = 7.8$  Hz, 1H), 7.37 – 7.34 (m, 1H), 7.11 – 7.05 (m, 4H), 7.02 – 6.98 (m, 1H), 6.94 (d,  $J = 7.2$  Hz, 1H), 6.81 (s, 1H), 4.01 (s, 3H), 3.83 – 3.80 (m, 2H), 3.61 – 3.54 (m, 1H), 3.21 – 3.16 (m, 1H), 3.05 – 2.99 (m, 1H), 2.77 (s, 3H), 2.30 (s, 3H) ppm;  $^{13}\text{C NMR}$  (101 MHz,  $\text{CDCl}_3$ )  $\delta$  164.4, 150.0, 148.0, 137.2, 137.1, 136.1, 135.5, 129.0 (2 $\times$ C), 128.4, 128.0, 126.0, 124.4, 122.2, 121.5, 119.2, 117.4, 115.1, 43.2, 39.4, 38.5, 36.7, 21.1, 19.9 ppm; **HRMS** (ESI-TOF)  $m/z$ :  $[\text{M}+\text{H}]^+$  Calcd. For  $\text{C}_{26}\text{H}_{28}\text{N}_3\text{O}^+$  398.2227 found 398.2234.

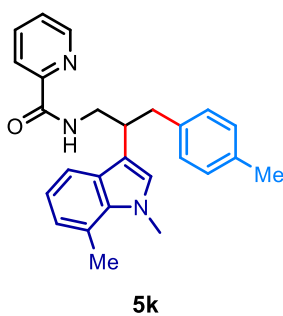

***E*-(2-(1-methyl-5-styryl-1*H*-indol-3-yl)-3-(*p*-tolyl)propyl)picolinamide (**5l**):**

Compound **5l** was synthesized according to GP-2 as yellow oil, 84% yield (102 mg); Eluent: 20-30% ethyl acetate in hexane;  $^1\text{H NMR}$  (400 MHz,  $\text{CDCl}_3$ )  $\delta$  8.46 (d,  $J = 4.2$  Hz, 1H), 8.26 (d,  $J = 7.8$  Hz, 1H), 8.18 (s, 1H), 7.87 – 7.83 (m, 1H), 7.79 (s, 1H), 7.59 (d,  $J = 7.6$  Hz, 2H), 7.55 (d,  $J = 8.5$  Hz, 1H), 7.44 (t,  $J = 7.6$  Hz, 2H), 7.39 – 7.38 (m, 1H), 7.35 – 7.33 (m, 2H), 7.31 – 7.30 (m, 1H), 7.17 – 7.08 (m, 5H), 6.97 (s, 1H), 4.02 – 3.96 (m, 1H), 3.87 – 3.82 (m, 1H), 3.80 (s, 3H), 3.71 – 3.64 (m, 1H), 3.27 – 3.22 (m, 1H), 3.18 – 3.13 (m, 1H), 2.35 (s, 3H) ppm;  $^{13}\text{C NMR}$  (101 MHz,  $\text{CDCl}_3$ )  $\delta$  164.5, 150.0, 148.1, 138.2, 137.3, 137.2, 137.1, 135.6, 130.2, 129.09, 129.06, 128.7, 128.6, 127.8, 127.00, 126.97, 126.3, 126.0, 125.9, 122.2, 120.3, 118.5, 116.2, 109.7, 43.9, 39.6, 38.9, 32.9, 21.1 ppm; **HRMS** (ESI-TOF)  $m/z$ :  $[\text{M}+\text{H}]^+$  Calcd. For  $\text{C}_{33}\text{H}_{32}\text{N}_3\text{O}^+$  486.2540 found 486.2549.

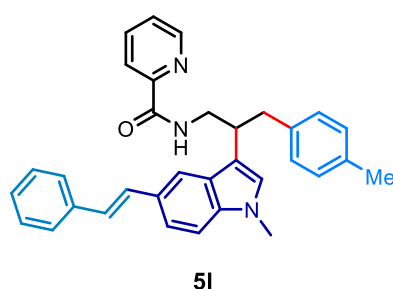

***N*-2-(1-methyl-5-phenyl-1*H*-indol-3-yl)-3-(*p*-tolyl)propylpicolinamide (5m):**

Compound **5m** was synthesized according to GP-2 as brown oil, 81% yield (93 mg); Eluent: 15-25% ethyl acetate in hexane;  $^1\text{H NMR}$  (400 MHz,  $\text{CDCl}_3$ )  $\delta$  8.24 – 8.23 (m, 1H), 8.08 – 8.01 (m, 2H), 7.71 (s, 1H), 7.66 (t,  $J = 7.8$  Hz, 1H), 7.51 – 7.49 (m, 2H), 7.39 (d,  $J = 8.6$  Hz, 1H), 7.35 – 7.31 (m, 2H), 7.24 – 7.14 (m, 3H), 7.00 – 6.93 (m, 4H), 6.85 (d,  $J = 2.3$  Hz, 1H), 3.87 – 3.80 (m, 1H), 3.72 – 3.65 (m, 4H), 3.57 – 3.50 (m, 1H), 3.11 – 3.06 (m, 1H), 3.03 – 2.97 (m, 1H), 2.18 (s, 3H) ppm;  $^{13}\text{C NMR}$  (101 MHz,  $\text{CDCl}_3$ )  $\delta$  164.4, 149.9, 148.0, 142.6, 137.2, 137.0, 136.8, 135.5, 132.5, 129.1, 129.0, 128.7, 128.0, 127.4, 127.0, 126.3, 126.0, 122.2, 121.5, 118.0, 116.1, 109.6, 43.9, 39.7, 38.8, 32.9, 21.1 ppm; **HRMS** (ESI-TOF)  $m/z$ :  $[\text{M}+\text{Na}]^+$  Calcd. For  $\text{C}_{31}\text{H}_{29}\text{N}_3\text{ONa}^+$  482.2203 found 482.2210.

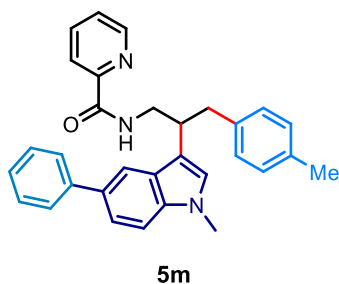

***N*-2-(5-(4-ethylphenyl)-1-methyl-1*H*-indol-3-yl)-3-(*p*-tolyl)propylpicolinamide (5n):**

Compound **5n** was synthesized according to GP-2 as yellow oil, 85% yield (104 mg); Eluent: 15-25% ethyl acetate in hexane;  $^1\text{H NMR}$  (400 MHz,  $\text{CDCl}_3$ )  $\delta$  8.36 (d,  $J = 4.7$  Hz, 1H), 8.19 (d,  $J = 7.9$  Hz, 1H), 8.13 (s, 1H), 7.82 – 7.76 (m, 2H), 7.54 (d,  $J = 7.5$  Hz, 2H), 7.50 (d,  $J = 8.7$  Hz, 1H), 7.36 (d,  $J = 8.6$  Hz, 1H), 7.33 – 7.26 (m, 3H), 7.12 – 7.05 (m, 4H), 6.95 (s, 1H), 3.97 – 3.91 (m, 1H), 3.83 – 3.76 (m, 4H), 3.67 – 3.60 (m, 1H), 3.23 – 3.17 (m, 1H), 3.13 – 3.07 (m, 1H), 2.74 (q,  $J = 7.6$  Hz, 2H), 2.30 (s, 3H), 1.33 (t,  $J = 7.6$  Hz, 3H) ppm;  $^{13}\text{C NMR}$  (101 MHz,  $\text{CDCl}_3$ )  $\delta$  164.4, 150.0, 148.0, 142.4, 140.1, 137.2, 137.1, 136.8, 135.5, 132.5, 129.1, 129.0, 128.2, 127.9, 127.4, 126.9, 126.0, 122.2, 121.5, 117.9, 116.0, 109.6, 43.8, 39.7, 38.9, 32.9, 28.6, 21.1, 15.8 ppm; **HRMS** (ESI-TOF)  $m/z$ :  $[\text{M}+\text{H}]^+$  Calcd. For  $\text{C}_{33}\text{H}_{34}\text{N}_3\text{O}^+$  488.2696 found 488.2705.

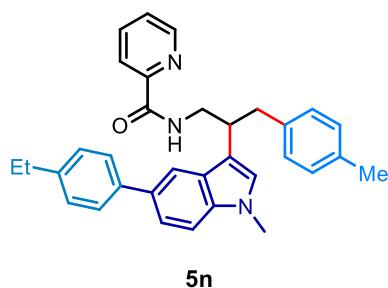

***N*-2-(5-(4-fluorophenyl)-1-methyl-1*H*-indol-3-yl)-3-(*p*-tolyl)propylpicolinamide (5o):**

Compound **5o** was synthesized according to GP-2 as brown oil, 82% yield (98 mg); Eluent: 20-30% ethyl acetate in hexane;  $^1\text{H NMR}$  (400 MHz,  $\text{CDCl}_3$ )  $\delta$  8.35 (d,  $J = 4.8$  Hz, 1H), 8.18 (d,  $J = 7.8$  Hz, 1H), 8.14 (s, 1H), 7.80 – 7.76 (m, 1H), 7.74 (s, 1H), 7.54 – 7.51 (m, 2H), 7.42 (dd,  $J = 8.5$ , 1.7 Hz, 1H), 7.35 – 7.30 (m, 2H), 7.13 – 7.04 (m, 6H), 6.97 (s, 1H), 3.97 – 3.90 (m, 1H), 3.81 – 3.75 (m, 4H), 3.68 – 3.61 (m, 1H), 3.20 – 3.08 (m, 2H), 2.28 (s, 3H) ppm;  $^{13}\text{C NMR}$  (101 MHz,  $\text{CDCl}_3$ )  $\delta$  164.4, 162.0 (d,  $J = 244.8$  Hz), 149.9, 147.9, 138.8 (d,  $J = 3.2$  Hz), 137.3, 137.1(2 $\times$ C), 136.8, 135.6, 131.5, 129.1, 129.0, 128.8 (d,  $J = 7.7$  Hz), 128.1, 127.0, 126.0, 122.2, 121.3, 117.9, 115.4 (d,  $J = 21.3$  Hz), 109.7, 44.0, 39.7, 38.8, 32.9, 21.1 ppm;  $^{19}\text{F NMR}$  (471 MHz,  $\text{CDCl}_3$ )  $\delta$  -

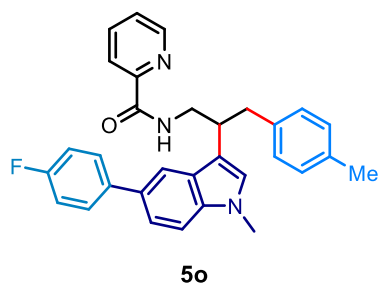



117.5; **HRMS** (ESI-TOF)  $m/z$ :  $[M+Na]^+$  Calcd. For  $C_{31}H_{28}FN_3ONa^+$  500.2109 found 500.2116.

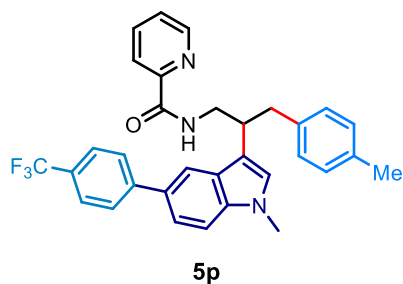

***N*-(2-(1-methyl-5-(4-(trifluoromethyl)phenyl)-1*H*-indol-3-yl)-3-(*p*-**

**tolyl)propyl)picolinamide (5p):** Compound **5p** was synthesized according to GP-2 as brown oil, 80% yield (106 mg); Eluent: 20-30% ethyl acetate in hexane; **<sup>1</sup>H NMR** (400 MHz,  $CDCl_3$ )  $\delta$  8.32 (d,  $J = 4.8$  Hz, 1H), 8.18 – 8.11 (m, 2H), 7.79 – 7.75 (m, 2H), 7.67 – 7.63 (m, 4H), 7.46 (dd,  $J = 8.5, 1.7$  Hz, 1H), 7.36 (d,  $J = 8.5$  Hz, 1H), 7.32 – 7.29 (m, 1H), 7.09 – 7.02 (m, 4H), 6.98 (s, 1H), 3.96 – 3.89 (m, 1H), 3.80 – 3.73 (m, 4H), 3.68 – 3.61 (m, 1H), 3.18 – 3.08 (m, 2H), 2.27 (s, 3H) ppm; **<sup>13</sup>C NMR** (101 MHz,  $CDCl_3$ )  $\delta$  164.4, 149.9, 148.0, 146.2, 137.3, 137.2, 137.0, 135.7, 130.9, 129.1 (2 $\times$ C), 128.3 (q,  $J = 32.8$  Hz), 127.6, 127.5, 127.2, 126.0, 125.6 (q,  $J = 3.6$  Hz), 124.6 (q,  $J = 271.7$  Hz), 122.3, 121.3, 118.5, 116.6, 109.9, 44.2, 39.7, 38.8, 33.0, 21.1 ppm; **<sup>19</sup>F NMR** (471 MHz,  $CDCl_3$ )  $\delta$  -62.2; **HRMS** (ESI-TOF)  $m/z$ :  $[M+H]^+$  Calcd. For  $C_{32}H_{29}F_3N_3O^+$  528.2257 found 528.2265.

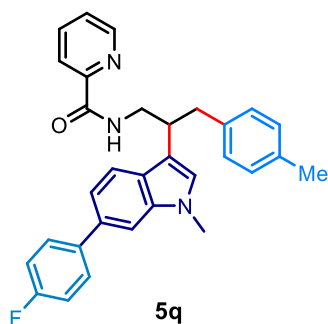

***N*-(2-(6-(4-fluorophenyl)-1-methyl-1*H*-indol-3-yl)-3-(*p*-**

**tolyl)propyl)picolinamide (5q):** Compound **5q** was synthesized according to GP-2 as brown oil, 81% yield (97 mg); Eluent: 20-30% ethyl acetate in hexane; **<sup>1</sup>H NMR** (400 MHz,  $CDCl_3$ )  $\delta$  8.43 (d,  $J = 4.3$  Hz, 1H), 8.20 (d,  $J = 7.7$  Hz, 1H), 8.12 (s, 1H), 7.83 – 7.78 (m, 2H), 7.66 – 7.62 (m, 2H), 7.45 (s, 1H), 7.37 – 7.32 (m, 2H), 7.18 – 7.14 (m, 2H), 7.11 – 7.05 (m, 4H), 6.95 (s, 1H), 3.94 – 3.83 (m, 2H), 3.77 (s, 3H), 3.66 – 3.59 (m, 1H), 3.24 – 3.19 (m, 1H), 3.12 – 3.07 (m, 1H), 2.30 (s, 3H) ppm; **<sup>13</sup>C NMR** (101 MHz,  $CDCl_3$ )  $\delta$  164.3, 162.2 (d,  $J = 245.3$  Hz), 150.0, 147.9, 138.6 (d,  $J = 3.4$  Hz), 137.9, 137.3, 137.0, 135.5, 134.3, 129.04, 129.01, 128.9 (d,  $J = 8.0$  Hz), 127.3, 126.6, 126.0, 122.2, 119.8, 118.7, 115.6 (d,  $J = 21.3$  Hz), 115.5, 107.9, 43.6, 39.5, 38.9, 32.8, 21.1 ppm; **<sup>19</sup>F NMR** (471 MHz,  $CDCl_3$ )  $\delta$  -116.8; **HRMS** (ESI-TOF)  $m/z$ :  $[M+H]^+$  Calcd. For  $C_{31}H_{29}FN_3O^+$  478.2289 found 478.2287.

***N*-2-(1-methyl-6-(*p*-tolyl)-1*H*-indol-3-yl)-3-(*p*-tolyl)propylpicolinamide**

**(5r):** Compound **5r** was synthesized according to GP-2 as yellow oil, 82% yield (97 mg); Eluent: 15-25% ethyl acetate in hexane;  $^1\text{H NMR}$  (400 MHz,  $\text{CDCl}_3$ )  $\delta$  8.43 (d,  $J = 4.3$  Hz, 1H), 8.19 (d,  $J = 7.8$  Hz, 1H), 8.09 (s, 1H), 7.85 – 7.76 (m, 2H), 7.60 (d,  $J = 7.9$  Hz, 2H), 7.49 (s, 1H), 7.39 – 7.34 (m, 2H), 7.29 (d,  $J = 7.9$  Hz, 2H), 7.12 – 7.04 (m, 4H), 6.92 (s, 1H), 3.90 – 3.83 (m, 2H), 3.77 (s, 3H), 3.63 – 3.56 (m, 1H), 3.23 – 3.18 (m, 1H), 3.10 – 3.05 (m, 1H), 2.43 (s, 3H), 2.30 (s, 3H) ppm;  $^{13}\text{C NMR}$  (101 MHz,  $\text{CDCl}_3$ )  $\delta$  164.3, 150.0, 147.9, 139.7, 138.0, 137.3, 137.1, 136.4, 135.5, 135.3, 129.5, 129.0 (2 $\times$ C), 127.4, 127.1, 126.5, 126.0, 122.2, 119.7, 118.8, 115.5, 107.8, 43.6, 39.6, 39.0, 32.8, 21.2, 21.1 ppm; **HRMS** (ESI-TOF)  $m/z$ :  $[\text{M}+\text{H}]^+$  Calcd. For  $\text{C}_{32}\text{H}_{32}\text{N}_3\text{O}^+$  474.2540 found 474.2546.

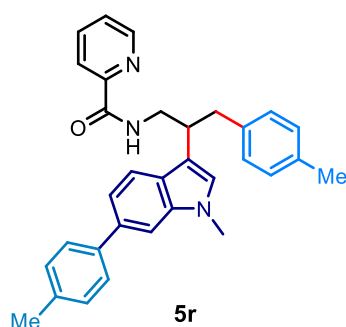

**methyl 4-(1-methyl-3-(1-(picolinamido)-3-(*p*-tolyl)propan-2-yl)-1*H*-indol-6-yl)benzoate (5s):** Compound **5s** was synthesized according to GP-2 as yellow oil, 86% yield (111 mg); Eluent: 20-30% ethyl acetate in hexane;  $^1\text{H NMR}$  (400 MHz,  $\text{CDCl}_3$ )  $\delta$  8.42 (d,  $J = 4.2$  Hz, 1H), 8.18 (d,  $J = 7.8$  Hz, 1H), 8.13 – 8.08 (m, 3H), 7.83 – 7.74 (m, 4H), 7.53 (s, 1H), 7.40 – 7.34 (m, 2H), 7.08 – 7.02 (m, 4H), 6.95 (s, 1H), 3.95 (s, 3H), 3.89 – 3.82 (m, 2H), 3.78 (s, 3H), 3.63 – 3.56 (m, 1H), 3.21 – 3.15 (m, 1H), 3.10 – 3.05 (m, 1H), 2.28 (s, 3H) ppm;  $^{13}\text{C NMR}$  (101 MHz,  $\text{CDCl}_3$ )  $\delta$  167.3, 164.3, 150.0, 147.9, 147.0, 137.9, 137.4, 137.0, 135.6, 133.9, 130.2, 129.1, 129.0, 128.3, 127.8, 127.4, 127.3, 126.1, 122.3, 120.0, 118.7, 115.7, 108.3, 52.2, 43.7, 39.5, 39.0, 32.9, 21.1 ppm; **HRMS** (ESI-TOF)  $m/z$ :  $[\text{M}+\text{H}]^+$  Calcd. For  $\text{C}_{33}\text{H}_{32}\text{N}_3\text{O}_3^+$  518.2438 found 518.2440.

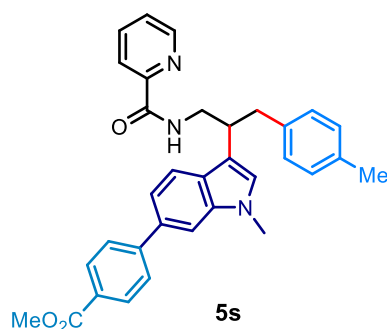

***N*-2-(1-ethyl-1*H*-indol-3-yl)-3-phenylpropylpicolinamide (5t):** Compound **5t** was synthesized according to GP-2 as yellow oil, 68% yield (65 mg); Eluent: 20-30% ethyl acetate in hexane;  $^1\text{H NMR}$  (400 MHz,  $\text{CDCl}_3$ )  $\delta$  8.29 (d,  $J = 4.8$  Hz, 1H), 8.07 (d,  $J = 7.8$  Hz, 1H), 7.97 (s, 1H), 7.70 – 7.66 (m, 1H), 7.61 (d,  $J = 7.9$  Hz, 1H), 7.23 (dd,  $J = 7.8, 4.9$  Hz, 2H), 7.15 – 7.09 (m, 3H), 7.05 – 6.99 (m, 4H), 6.83 (s, 1H), 4.01 (q,  $J = 7.3$  Hz, 2H), 3.78 – 3.70 (m, 2H), 3.53 – 3.46 (m, 1H), 3.13 – 3.08 (m, 1H), 3.02 – 2.96 (m, 1H), 1.30 (t,  $J = 7.2$  Hz, 3H) ppm;  $^{13}\text{C NMR}$  (101 MHz,  $\text{CDCl}_3$ )  $\delta$  164.3, 150.1, 147.9, 140.2, 137.3, 136.5, 129.2, 128.3, 127.4, 126.05, 126.01, 124.9, 122.2, 121.6, 119.5, 118.9, 115.3, 109.5, 43.2, 40.9, 39.8, 39.0, 15.5 ppm; **HRMS** (ESI-TOF)  $m/z$ :  $[\text{M}+\text{Na}]^+$  Calcd. For  $\text{C}_{25}\text{H}_{25}\text{N}_3\text{ONa}^+$  406.1890 found 406.1889.

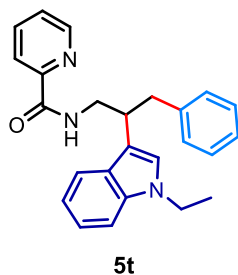

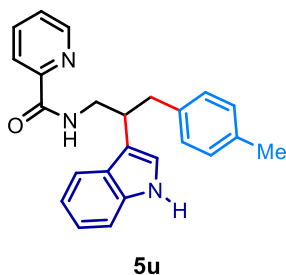

***N*-(2-(1*H*-indol-3-yl)-3-(*p*-tolyl)propyl)picolinamide (5u):** Compound **5u** was synthesized according to GP-2 as yellow oil, 36% yield (33 mg); Eluent: 30-40% ethyl acetate in hexane;  $^1\text{H NMR}$  (400 MHz,  $\text{CDCl}_3$ )  $\delta$  8.48 (d,  $J = 4.7$  Hz, 1H), 8.27 – 8.23 (m, 2H), 8.14 (s, 1H), 7.86 (t,  $J = 8.0$  Hz, 1H), 7.81 (d,  $J = 8.2$  Hz, 1H), 7.45 – 7.40 (m, 2H), 7.34 (d,  $J = 2.6$  Hz, 1H), 7.30 – 7.28 (m, 1H), 7.22 – 7.18 (m, 1H), 7.10 – 7.08 (m, 4H), 3.97 – 3.88 (m, 2H), 3.70 – 3.62 (m, 1H), 3.28 – 3.23 (m, 1H), 3.15 – 3.09 (m, 1H), 2.34 (s, 3H) ppm;  $^{13}\text{C NMR}$  (101 MHz,  $\text{CDCl}_3$ )  $\delta$  164.5, 150.0, 148.1, 137.3, 137.0, 136.7, 135.5, 129.1, 129.0, 126.8, 126.1, 122.2, 122.1, 121.9, 119.45, 119.37, 116.8, 111.4, 43.2, 39.3, 39.0, 21.1 ppm; **HRMS** (ESI-TOF)  $m/z$ :  $[\text{M}+\text{H}]^+$  Calcd. For  $\text{C}_{24}\text{H}_{24}\text{N}_3\text{O}^+$  370.1914 found 370.1921.

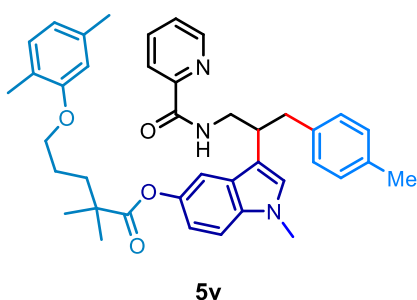

**1-methyl-3-(1-(picolinamido)-3-(*p*-tolyl)propan-2-yl)-1*H*-indol-5-yl 5-(2,5-dimethylphenoxy)-2,2-dimethylpentanoate (5v):** Compound **5v** was synthesized according to GP-2 as yellow oil, 75% yield (119 mg); Eluent: 20-30% ethyl acetate in hexane;  $^1\text{H NMR}$  (400 MHz,  $\text{CDCl}_3$ )  $\delta$  8.46 (d,  $J = 4.7$  Hz, 1H), 8.19 (d,  $J = 7.8$  Hz, 1H), 8.08 (s, 1H), 7.81 (t,  $J = 7.7$  Hz, 1H), 7.39 – 7.36 (m, 1H), 7.30 – 7.28 (m, 2H), 7.08 – 7.04 (m, 5H), 6.95 – 6.91 (m, 2H), 6.72 – 6.70 (m, 2H), 4.05 – 4.04 (m, 2H), 3.90 – 3.84 (m, 1H), 3.80 – 3.73 (m, 4H), 3.58 – 3.51 (m, 1H), 3.17 – 3.11 (m, 1H), 3.07 – 3.02 (m, 1H), 2.35 (s, 3H), 2.31 (s, 3H), 2.24 (s, 3H), 1.96 – 1.95 (m, 4H), 1.44 (s, 6H) ppm;  $^{13}\text{C NMR}$  (101 MHz,  $\text{CDCl}_3$ )  $\delta$  177.2, 164.4, 157.1, 150.0, 148.1, 144.2, 137.2, 136.9 (2 $\times$ C), 136.6, 135.5, 135.2, 130.4, 129.1, 129.0, 127.6, 126.0, 123.7, 122.1, 120.8, 115.9, 115.7, 112.1, 111.3, 109.8, 68.1, 43.5, 42.4, 39.5, 38.7, 37.3, 33.0, 25.43, 25.35, 21.5, 21.1, 15.9 ppm; **HRMS** (ESI-TOF)  $m/z$ :  $[\text{M}+\text{Na}]^+$  Calcd. For  $\text{C}_{40}\text{H}_{45}\text{N}_3\text{O}_5\text{Na}^+$  654.3302 found 654.3322.

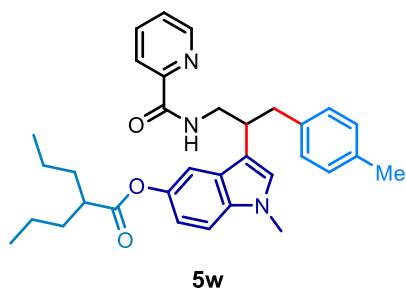

**1-methyl-3-(1-(picolinamido)-3-(*p*-tolyl)propan-2-yl)-1*H*-indol-5-yl 2-propylpentanoate (5w):** Compound **5w** was synthesized according to GP-2 as yellow oil, 86% yield (113 mg); Eluent: 20-30% ethyl acetate in hexane;  $^1\text{H NMR}$  (400 MHz,  $\text{CDCl}_3$ )  $\delta$  8.45 (d,  $J = 4.7$  Hz, 1H), 8.18 (d,  $J = 7.8$  Hz, 1H), 8.06 (s, 1H), 7.82 (t,  $J = 7.9$  Hz, 1H), 7.38 (t,  $J = 6.2$  Hz, 1H), 7.28 – 7.27 (m, 2H), 7.08 – 7.05 (m, 4H), 6.95 – 6.89 (m, 2H), 3.89 – 3.74 (m, 5H), 3.57 – 3.49 (m, 1H), 3.15 – 3.10 (m, 1H), 3.05 – 3.00 (m, 1H), 2.68 – 2.62 (m, 1H), 2.30 (s, 3H), 1.86 – 1.76 (m, 2H), 1.62 – 1.45 (m, 6H), 1.02 (t,  $J = 7.1$  Hz, 6H) ppm;  $^{13}\text{C NMR}$  (101 MHz,  $\text{CDCl}_3$ )  $\delta$  175.9, 164.4, 150.0, 148.1, 144.1, 137.3, 136.9, 135.6, 135.2, 129.1, 129.0, 127.59, 127.56, 126.0, 122.2, 116.0, 115.7, 111.3, 109.8, 45.5, 43.4, 39.6, 38.8, 34.9, 33.1, 21.1, 20.9, 14.3 ppm; **HRMS** (ESI-TOF)  $m/z$ :  $[\text{M}+\text{H}]^+$  Calcd. For  $\text{C}_{33}\text{H}_{40}\text{N}_3\text{O}_3^+$  526.3064 found 526.3077.

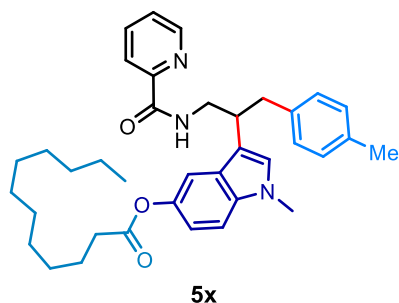

**1-methyl-3-(1-(picolinamido)-3-(*p*-tolyl)propan-2-yl)-1*H*-indol-5-yl dodecanoate (5x):** Compound **5x** was synthesized according to GP-2 as yellow oil, 77% yield (112 mg); Eluent: 20-30% ethyl acetate in hexane;  $^1\text{H NMR}$  (400 MHz,  $\text{CDCl}_3$ )  $\delta$  8.42 (d,  $J = 4.8$  Hz, 1H), 8.15 (d,  $J = 7.9$  Hz, 1H), 8.04 (s, 1H), 7.79 (t,  $J = 7.8$  Hz, 1H), 7.37 – 7.34 (m, 1H), 7.31 (d,  $J = 1.8$  Hz, 1H), 7.25 – 7.24 (m, 1H), 7.05 – 7.00 (m, 4H), 6.95 – 6.91 (m, 2H), 3.83 – 3.76 (m, 2H), 3.72 (s, 3H), 3.54 – 3.47 (m, 1H), 3.14 – 3.09 (m, 1H), 3.02 – 2.97 (m, 1H), 2.57 (t,  $J = 7.5$  Hz, 2H), 2.27 (s, 3H), 1.82 – 1.74 (m, 2H), 1.34 – 1.26 (m, 16H), 0.89 (t,  $J = 6.5$  Hz, 3H) ppm;  $^{13}\text{C NMR}$  (101 MHz,  $\text{CDCl}_3$ )  $\delta$  173.4, 164.4, 150.0, 148.1, 144.0, 137.3, 137.0, 135.6, 135.3, 129.1 (2 $\times$ C), 127.7, 127.5, 126.0, 122.2, 116.0, 115.7, 111.4, 109.8, 43.4, 39.5, 38.9, 34.6, 33.1, 32.0, 29.8 (2 $\times$ C), 29.6, 29.48, 29.45, 29.4, 25.2, 22.8, 21.1, 14.3 ppm; **HRMS** (ESI-TOF)  $m/z$ :  $[\text{M}+\text{H}]^+$  Calcd. For  $\text{C}_{37}\text{H}_{48}\text{N}_3\text{O}_3^+$  582.3690 found 582.3699.

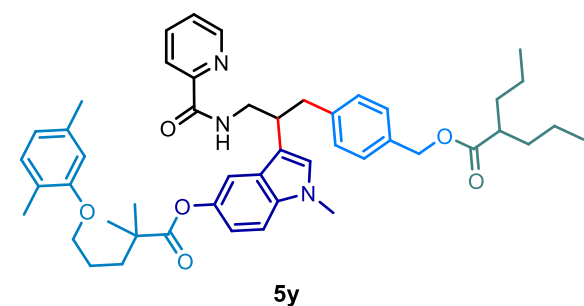

**1-methyl-3-(1-(picolinamido)-3-(4-(((2-propylpentanoyl)oxy)methyl)phenyl)propan-2-yl)-1*H*-indol-5-yl 5-(2,5-dimethylphenoxy)-2,2-dimethylpentanoate (5y):** Compound **5y** was synthesized according to GP-2 as yellow oil, 79% yield (153 mg); Eluent: 20-30% ethyl acetate in hexane;  $^1\text{H NMR}$  (400 MHz,  $\text{CDCl}_3$ )  $\delta$  8.36 – 8.34 (m, 1H), 8.07 (d,  $J = 7.9$  Hz, 1H), 7.96 (s, 1H), 7.71 (t,  $J = 7.7$  Hz, 1H), 7.29 – 7.26 (m, 1H), 7.18 – 7.15 (m, 2H), 7.10 – 7.03 (m, 4H), 6.92 (d,  $J = 7.4$  Hz, 1H), 6.81 (d,  $J = 3.3$  Hz, 2H), 6.58 (d,  $J = 8.4$  Hz, 2H), 4.95 (s, 2H), 3.93 (s, 2H), 3.78 – 3.71 (m, 1H), 3.67 – 3.61 (m, 4H), 3.48

– 3.40 (m, 1H), 3.08 – 3.03 (m, 1H), 3.00 – 2.94 (m, 1H), 2.35 – 2.28 (m, 1H), 2.22 (s, 3H), 2.11 (s, 3H), 1.83 (s, 4H), 1.55 – 1.47 (m, 2H), 1.36 – 1.31 (m, 8H), 1.21 – 1.16 (m, 4H), 0.79 (t,  $J = 7.0$  Hz, 6H) ppm;  $^{13}\text{C NMR}$  (101 MHz,  $\text{CDCl}_3$ )  $\delta$  177.3, 176.6, 164.4, 157.1, 149.9, 148.1, 144.3, 140.0, 137.3, 136.6, 135.2, 134.0, 130.4, 129.3, 128.1, 127.7, 127.5, 126.1, 123.7, 122.2, 120.8, 116.0, 115.3, 112.1, 111.2, 109.9, 68.0, 65.9, 45.4, 43.5, 42.5, 39.5, 38.7, 37.3, 34.7, 33.1, 25.45, 25.37, 21.5, 20.7, 16.0, 14.1 ppm; **HRMS** (ESI-TOF)  $m/z$ :  $[\text{M}+\text{Na}]^+$  Calcd. For  $\text{C}_{48}\text{H}_{59}\text{N}_3\text{O}_6\text{Na}^+$  796.4296 found 796.4325.

***N*-(2-(1-methyl-1*H*-indol-3-yl)-1-phenyl-3-(*p*-tolyl)propyl)picolinamide (5z):** Compound **5z** was synthesized according to GP-2 as yellow oil, 68% yield (78 mg); Eluent: 20–30% ethyl acetate in hexane;  $^1\text{H NMR}$  (400 MHz,  $\text{CDCl}_3$ )  $\delta$  8.78 – 8.72 (m, 2.20H), 8.52 – 8.44 (m, 2.20H), 8.19 – 8.16 (m, 2.19H), 7.81 – 7.77 (m, 2.20H), 7.55 (d,  $J = 8.1$  Hz, 1.22H), 7.41 – 7.35 (m, 2.55H), 7.24 – 7.17 (m, 6.32H), 7.16 – 7.06 (m, 10.42H), 7.02 – 6.86 (m, 11.27H), 6.49 (s, 1.22H), 5.65 (t,  $J = 7.8$  Hz, 1.20H), 5.56 (dd,  $J = 9.1, 3.9$  Hz, 1.0H), 3.92 – 3.88 (m, 1.23H), 3.82 – 3.77 (m, 1.02H), 3.76 (s, 3.00H), 3.61 (s, 3.61H), 3.23 – 3.16 (m, 2.02H), 3.12 – 3.05 (m, 2.38H), 2.30 (s, 3.02H), 2.23 (s, 3.60H) ppm;  $^{13}\text{C NMR}$  (101 MHz,  $\text{CDCl}_3$ )  $\delta$  163.9, 163.6, 150.2, 150.0, 148.1, 148.0, 142.1, 140.4, 137.5, 137.4, 137.3 (2 $\times$ C), 137.0, 136.9, 135.6, 135.2, 129.18, 129.16, 128.9, 128.8, 128.14 (2 $\times$ C), 128.08, 127.93, 127.89, 127.86, 127.5, 127.2, 126.9 (2 $\times$ C), 126.2, 126.1, 122.4, 122.3, 121.5, 121.3, 120.1 (2 $\times$ C), 118.79, 118.76, 113.2, 113.0, 109.1, 108.9, 57.2, 54.6, 46.2, 44.2, 39.0, 37.9, 32.9, 32.7, 21.2, 21.1 ppm; **HRMS** (ESI-TOF)  $m/z$ :  $[\text{M}+\text{H}]^+$  Calcd. For  $\text{C}_{31}\text{H}_{30}\text{N}_3\text{O}^+$  460.2383 found 460.2387.

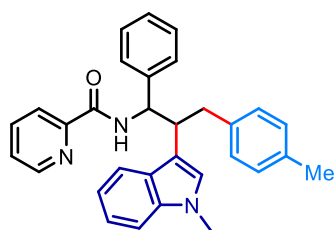

**5z**  
*dr = 1.2:1*

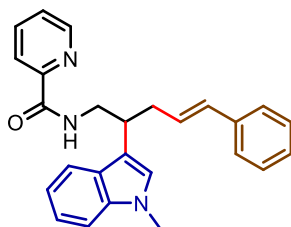

**7a**

**(E)-N-(2-(1-methyl-1H-indol-3-yl)-5-phenylpent-4-en-1-yl)picolinamide (7a):**

Compound **7a** was synthesized according to GP-3 as yellow oil, 92% yield (91 mg); Eluent: 15-25% ethyl acetate in hexane;  $^1\text{H NMR}$  (400 MHz,  $\text{CDCl}_3$ )  $\delta$  8.28 (d,  $J = 4.7$  Hz, 1H), 8.11 – 8.07 (m, 2H), 7.67 (t,  $J = 7.7$  Hz, 1H), 7.62 (d,  $J = 8.0$  Hz, 1H), 7.24 – 7.20 (m, 2H), 7.18 – 7.11 (m, 5H), 7.07 – 6.99 (m, 2H), 6.85 (s, 1H), 6.35 (d,  $J = 15.8$  Hz, 1H), 6.18 – 6.11 (m, 1H), 3.82 – 3.73 (m, 2H), 3.63 (s, 3H), 3.38 – 3.31 (m, 1H), 2.70 – 2.62 (m, 2H) ppm;  $^{13}\text{C NMR}$  (101 MHz,  $\text{CDCl}_3$ )  $\delta$  164.4, 149.9, 148.0, 137.6, 137.33, 137.29, 131.6, 128.6, 128.4, 127.3, 126.9, 126.2, 126.1, 126.0, 122.2, 121.7, 119.5, 118.9, 115.3, 109.4, 43.9, 37.4, 37.2, 32.8 ppm; **HRMS** (ESI-TOF)  $m/z$ :  $[\text{M}+\text{H}]^+$  Calcd. For  $\text{C}_{26}\text{H}_{26}\text{N}_3\text{O}^+$  396.2070 found 396.2077.

**(E)-N-(2-(1-methyl-1H-indol-3-yl)-5-phenylpent-4-en-1-yl)isoquinoline-1-carboxamide (7a')**

Compound **7a'** was synthesized according to GP-3 as brown oil, 90% yield (100 mg); Eluent: 15-25% ethyl acetate in hexane;  $^1\text{H NMR}$  (400 MHz,  $\text{CDCl}_3$ )  $\delta$  9.53 (d,  $J = 8.0$  Hz, 1H), 8.25 – 8.21 (m, 2H), 7.74 – 7.68 (m, 2H), 7.65 – 7.58 (m, 3H), 7.24 – 7.16 (m, 6H), 7.11 – 7.04 (m, 2H), 6.95 (d,  $J = 3.0$  Hz, 1H), 6.42 (d,  $J = 15.7$  Hz, 1H), 6.26 – 6.18 (m, 1H), 3.91 – 3.81 (m, 2H), 3.69 (s, 3H), 3.46 – 3.40 (m, 1H), 2.75 (t,  $J = 8.0$  Hz, 2H) ppm;  $^{13}\text{C NMR}$  (101 MHz,  $\text{CDCl}_3$ )  $\delta$  166.1, 148.5, 140.1, 137.7, 137.44, 137.37, 131.6, 130.6, 128.7, 128.6, 128.5, 128.0, 127.4, 127.01, 126.98, 126.8, 126.4, 126.2, 124.2, 121.8, 119.6, 119.0, 115.4, 109.4, 44.1, 37.5, 37.3, 32.9 ppm; **HRMS** (ESI-TOF)  $m/z$ :  $[\text{M}+\text{H}]^+$  Calcd. For  $\text{C}_{30}\text{H}_{28}\text{N}_3\text{O}^+$  446.2227 found 446.2231.

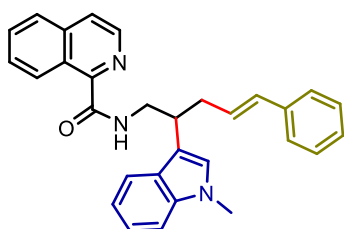

**7a'**

**(E)-N-(2-(6-fluoro-1-methyl-1H-indol-3-yl)-5-phenylpent-4-en-1-yl)picolinamide (7b):**

Compound **7b** was synthesized according to GP-3 as yellow oil, 70% yield (72 mg); Eluent: 15-25% ethyl acetate in hexane;  $^1\text{H NMR}$  (400 MHz,  $\text{CDCl}_3$ )  $\delta$  8.44 (d,  $J = 4.7$  Hz, 1H), 8.23 – 8.20 (m, 2H), 7.84 (t,  $J = 7.7$  Hz, 1H), 7.66 – 7.63 (m, 1H), 7.41 – 7.38 (m, 1H), 7.32 – 7.28 (m, 4H), 7.22 – 7.18 (m, 1H), 7.01 (d,  $J = 9.8$  Hz, 1H), 6.97 (s, 1H), 6.90 (t,  $J = 9.1$  Hz, 1H), 6.49 (d,  $J = 15.7$  Hz, 1H), 6.30 – 6.23 (m, 1H), 3.91 – 3.85 (m, 2H), 3.73 (s, 3H), 3.48 – 3.41 (m, 1H), 2.77 (t,  $J = 7.1$  Hz, 2H) ppm;  $^{13}\text{C NMR}$  (101 MHz,  $\text{CDCl}_3$ )  $\delta$  164.5, 160.0 (d,  $J = 237.8$  Hz), 150.0, 148.1, 137.6, 137.38 (d,  $J = 11.4$  Hz), 137.36, 131.7, 128.50, 128.47, 127.1, 126.4 (d,  $J = 3.7$  Hz), 126.2, 126.1, 124.0, 122.2, 120.3 (d,  $J = 10.1$  Hz), 115.8, 107.7 (d,  $J = 24.5$  Hz), 95.8 (d,  $J = 26.0$  Hz),

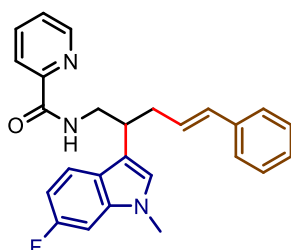

**7b**

44.1, 37.4, 37.2, 33.0 ppm;  $^{19}\text{F}$  NMR (471 MHz,  $\text{CDCl}_3$ )  $\delta$  -120.9 ppm; HRMS (ESI-TOF)  $m/z$ :  $[\text{M}+\text{H}]^+$  Calcd. For  $\text{C}_{26}\text{H}_{25}\text{FN}_3\text{O}^+$  414.1976 found 414.1988.

**(E)-N-(2-(6-chloro-1-methyl-1H-indol-3-yl)-5-phenylpent-4-en-1-yl)picolinamide (7c):** Compound **7c** was synthesized according to GP-3 as yellow oil, 73% yield (78 mg); Eluent: 15-25% ethyl acetate in hexane;  $^1\text{H}$  NMR (400 MHz,  $\text{CDCl}_3$ )  $\delta$  8.44 (d,  $J = 4.7$  Hz, 1H), 8.23 – 8.19 (m, 2H), 7.84 (t,  $J = 7.7$  Hz, 1H), 7.64 (d,  $J = 8.5$  Hz, 1H), 7.41 – 7.38 (m, 1H), 7.33 – 7.28 (m, 5H), 7.22 – 7.18 (m, 1H), 7.10 (dd,  $J = 8.5, 2.0$  Hz, 1H), 6.98 (s, 1H), 6.48 (d,  $J = 15.7$  Hz, 1H), 6.28 – 6.21 (m, 1H), 3.91 – 3.83 (m, 2H), 3.74 (s, 3H), 3.48 – 3.41 (m, 1H), 2.77 (t,  $J = 7.1$  Hz, 2H) ppm;  $^{13}\text{C}$  NMR (101 MHz,  $\text{CDCl}_3$ )  $\delta$  164.5, 149.9, 148.1, 137.7, 137.6, 137.4, 131.8, 128.5, 128.4, 127.9, 127.1, 126.9, 126.2 (2 $\times$ C), 126.0, 122.2, 120.4, 119.6, 115.8, 109.5, 44.1, 37.4, 37.2, 32.9 ppm; HRMS (ESI-TOF)  $m/z$ :  $[\text{M}+\text{H}]^+$  Calcd. For  $\text{C}_{26}\text{H}_{25}\text{ClN}_3\text{O}^+$  430.1681 found 430.1687.

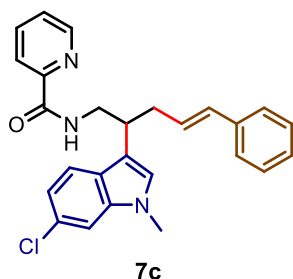

**(E)-N-(2-(6-methoxy-1-methyl-1H-indol-3-yl)-5-phenylpent-4-en-1-yl)picolinamide (7d):** Compound **7d** was synthesized according to GP-3 as brown oil, 84% yield (89 mg); Eluent: 20-30% ethyl acetate in hexane;  $^1\text{H}$  NMR (400 MHz,  $\text{CDCl}_3$ )  $\delta$  8.44 (d,  $J = 4.8$  Hz, 1H), 8.25 – 8.22 (m, 2H), 7.82 (t,  $J = 7.8$  Hz, 1H), 7.63 (dd,  $J = 8.6, 2.1$  Hz, 1H), 7.37 (t,  $J = 6.3$  Hz, 1H), 7.33 – 7.28 (m, 4H), 7.22 – 7.18 (m, 1H), 6.89 (d,  $J = 2.1$  Hz, 1H), 6.86 – 6.81 (m, 2H), 6.50 (d,  $J = 15.7$  Hz, 1H), 6.34 – 6.25 (m, 1H), 3.94 – 3.83 (m, 5H), 3.73 (s, 3H), 3.47 – 3.40 (m, 1H), 2.82 – 2.77 (m, 2H) ppm;  $^{13}\text{C}$  NMR (101 MHz,  $\text{CDCl}_3$ )  $\delta$  164.4, 156.5, 150.0, 148.0, 138.1, 137.6, 137.3, 131.5, 128.7, 128.4, 126.9, 126.1, 126.0, 125.1, 122.2, 121.7, 120.1, 115.4, 108.9, 92.9, 55.8, 44.0, 37.5, 37.2, 32.8 ppm; HRMS (ESI-TOF)  $m/z$ :  $[\text{M}+\text{H}]^+$  Calcd. For  $\text{C}_{27}\text{H}_{28}\text{N}_3\text{O}_2^+$  426.2176 found 426.2181.

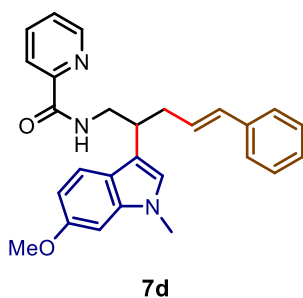

**(E)-N-(2-(1,2-dimethyl-1H-indol-3-yl)-5-phenylpent-4-en-1-yl)picolinamide (7e):** Compound **7e** was synthesized according to GP-3 as yellow oil, 96% yield (98 mg); Eluent: 15-25% ethyl acetate in hexane;  $^1\text{H}$  NMR (400 MHz,  $\text{CDCl}_3$ )  $\delta$  8.27 (s, 1H), 8.07 (d,  $J = 7.7$  Hz, 1H), 7.97 (s, 1H), 7.68 – 7.62 (m, 2H), 7.23 – 7.17 (m, 2H), 7.13 – 6.97 (m, 7H), 6.30 (d,  $J = 15.7$  Hz, 1H), 6.09 – 6.01 (m, 1H), 4.13 – 4.05 (m, 1H), 3.61 – 3.54 (m, 1H), 3.51 (s, 3H), 3.29 – 3.21 (m, 1H), 2.83 – 2.72 (m, 2H), 2.20 (s, 3H) ppm;  $^{13}\text{C}$  NMR (101 MHz,  $\text{CDCl}_3$ )  $\delta$  164.3, 150.0, 148.0, 137.7, 137.24, 137.20, 134.3, 131.1, 129.1, 128.4, 126.8, 126.3, 126.1, 126.0, 122.1, 120.5, 119.3, 118.8, 110.4, 108.9, 43.8, 38.7, 36.6, 29.6, 10.6 ppm;

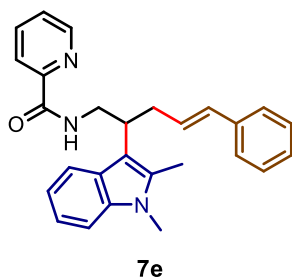

**HRMS** (ESI-TOF)  $m/z$ :  $[M+H]^+$  Calcd. For  $C_{27}H_{28}N_3O^+$  410.2227 found 410.2238.

**(E)-N-(2-(7-methoxy-1-methyl-1H-indol-3-yl)-5-phenylpent-4-en-1-yl)picolinamide (7f):**

Compound **7f** was synthesized according to GP-3 as brown oil, 88% yield (94 mg); Eluent: 20-30% ethyl acetate in hexane;  $^1H$  NMR (400 MHz,  $CDCl_3$ )  $\delta$  8.33 (d,  $J = 4.8$  Hz, 1H), 8.13 – 8.07 (m, 2H), 7.72 (t,  $J = 7.6$  Hz, 1H), 7.29 – 7.28 (m, 1H), 7.21 – 7.14 (m, 5H), 7.08 (t,  $J = 7.2$  Hz, 1H), 6.92 – 6.88 (m, 1H), 6.75 (s, 1H), 6.54 (d,  $J = 7.6$  Hz, 1H), 6.37 (d,  $J = 15.9$  Hz, 1H), 6.20 – 6.12 (m, 1H), 3.94 (s, 3H), 3.84 (s, 3H), 3.78 – 3.75 (m, 2H), 3.35 – 3.28 (m, 1H), 2.71 – 2.59 (m, 2H) ppm;  $^{13}C$  NMR (101 MHz,  $CDCl_3$ )  $\delta$  164.5, 150.1, 148.1, 148.0, 137.7, 137.3, 131.6, 129.7, 128.8, 128.5, 127.4, 127.1, 127.0, 126.2, 126.1, 122.3, 119.5, 115.3, 112.3, 102.5, 55.5, 43.9, 37.4, 37.2, 36.6 ppm; **HRMS** (ESI-TOF)  $m/z$ :  $[M+H]^+$  Calcd. For  $C_{27}H_{28}N_3O_2^+$  426.2176 found 426.2183.

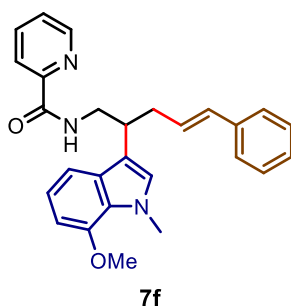

**(E)-1-methyl-3-(5-phenyl-1-(picolinamido)pent-4-en-2-yl)-1H-indol-5-yl 5-(2,5-dimethylphenoxy)-2,2-dimethylpentanoate (7g):**

Compound **7g** was synthesized according to GP-3 as yellow oil, 81% yield (130 mg); Eluent: 20-30% ethyl acetate in hexane;  $^1H$  NMR (400 MHz,  $CDCl_3$ )  $\delta$  8.34 – 8.32 (m, 1H), 8.09 – 8.04 (m, 2H), 7.70 (t,  $J = 7.7$  Hz, 1H), 7.28 – 7.25 (m, 1H), 7.22 (s, 1H), 7.18 – 7.15 (m, 5H), 7.09 – 7.05 (m, 1H), 6.92 – 6.89 (m, 2H), 6.82 (d,  $J = 8.7$  Hz, 1H), 6.59 – 6.56 (m, 2H), 6.35 (d,  $J = 15.8$  Hz, 1H), 6.17 – 6.09 (m, 1H), 3.90 (s, 2H), 3.82 – 3.77 (m, 1H), 3.72 – 3.66 (m, 4H), 3.31 – 3.27 (m, 1H), 2.62 (t,  $J = 7.1$  Hz, 2H), 2.22 (s, 3H), 2.11 (s, 3H), 1.82 – 1.81 (m, 4H), 1.29 (s, 6H) ppm;  $^{13}C$  NMR (101 MHz,  $CDCl_3$ )  $\delta$  177.3, 164.5, 157.1, 150.0, 148.1, 144.3, 137.6, 137.3, 136.6, 135.2, 131.8, 130.4, 128.5 (2 $\times$ C), 127.6, 127.4, 127.0, 126.2, 126.1, 123.7, 122.2, 120.8, 116.0, 115.6, 112.1, 111.3, 109.8, 68.0, 43.9, 42.4, 37.4, 37.3 (2 $\times$ C), 33.1, 25.42, 25.35, 21.5, 16.0 ppm; **HRMS** (ESI-TOF)  $m/z$ :  $[M+H]^+$  Calcd. For  $C_{41}H_{46}N_3O_4^+$  644.3483 found 644.3476.

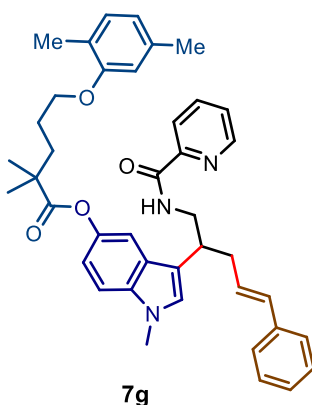

**(E)-N-(2-(1-methyl-1H-indol-3-yl)-1,5-diphenylpent-4-en-1-yl)picolinamide (7h):**

Compound **7h** was synthesized according to GP-3 as yellow oil, 84% yield (99 mg); Eluent: 20-30% ethyl acetate in hexane;  $^1H$  NMR (400 MHz,  $CDCl_3$ )  $\delta$  8.72 – 8.66 (m, 2.20H), 8.37 – 8.30 (m, 2.21H), 8.08 (t,  $J = 8.8$  Hz, 2.21H), 7.72 – 7.67 (m, 2.29H), 7.47 (d,  $J = 8.0$  Hz, 1.40H), 7.29 – 7.25 (m, 2.22H), 7.18 – 7.16 (m, 4.45H), 7.15 – 7.11 (m, 9.34H), 7.10 – 7.05 (m, 12.98H), 6.93 (t,  $J = 7.6$  Hz, 1.51H), 6.85 (t,  $J = 7.6$  Hz, 1.01H), 6.81 (s, 1.00H), 6.52 (s, 1.20H), 6.31 (d,  $J =$

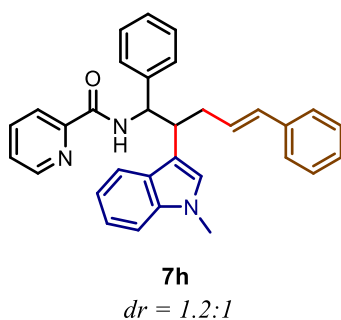



16.0 Hz, 2.42H), 6.17 – 6.05 (m, 2.28H), 5.62 – 5.55 (m, 2.22H), 3.66 (s, 3.04H), 3.63 – 3.60 (m, 2.22H), 3.56 (s, 3.62H), 2.80 – 2.71 (m, 2.02H), 2.67 – 2.59 (m, 2.42H) ppm;  $^{13}\text{C}$  NMR (101 MHz,  $\text{CDCl}_3$ )  $\delta$  163.8, 163.6, 150.1, 149.9, 148.11, 148.09, 141.6, 140.5, 137.7 (2 $\times$ C), 137.3 (2 $\times$ C), 137.02, 136.99, 131.9, 131.5, 129.0, 128.7, 128.5, 128.4, 128.2, 128.1, 128.0, 127.9, 127.8, 127.7, 127.3, 127.2, 127.14, 127.10, 127.0, 126.9, 126.21, 126.16 (3 $\times$ C), 122.4 (2 $\times$ C), 121.54, 121.48, 119.9 (2 $\times$ C), 118.88, 118.86, 113.3, 113.1, 109.2, 109.0, 57.2, 56.0, 44.0, 42.9, 36.6, 36.1, 32.9, 32.8 ppm; HRMS (ESI-TOF)  $m/z$ :  $[\text{M}+\text{H}]^+$  Calcd. For  $\text{C}_{32}\text{H}_{30}\text{N}_3\text{O}^+$  472.2383 found 472.2388.

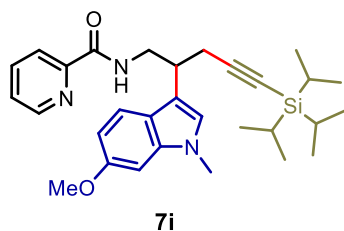

***N*-(2-(6-methoxy-1-methyl-1*H*-indol-3-yl)-5-(triisopropylsilyl)pent-4-yn-1-yl)picolinamide (7i):** Compound **7i** was synthesized according to GP-3 as brown oil, 46% yield (58 mg); Eluent: 10-20% ethyl acetate in hexane;  $^1\text{H}$  NMR (400 MHz,  $\text{CDCl}_3$ )  $\delta$  8.46 (d,  $J = 4.2$  Hz, 1H), 8.22 – 8.18 (m, 2H), 7.82 (t,  $J = 8.0$  Hz, 1H), 7.57 (d,  $J = 8.6$  Hz, 1H), 7.40 – 7.36 (m, 1H), 7.02 (s, 1H), 6.78 – 6.75 (m, 2H), 3.99 – 3.87 (m, 5H), 3.69 (s, 3H), 3.54 – 3.49 (m, 1H), 2.86 – 2.69 (m, 2H), 1.06 – 0.99 (m, 21H) ppm;  $^{13}\text{C}$  NMR (101 MHz,  $\text{CDCl}_3$ )  $\delta$  164.6, 156.5, 150.0, 148.1, 137.8, 137.4, 126.1, 125.3, 122.3, 121.9, 120.0, 114.8, 108.9, 106.6, 93.0, 82.8, 55.9, 43.3, 35.8, 32.8, 24.6, 18.7, 11.4 ppm; HRMS (ESI-TOF)  $m/z$ :  $[\text{M}+\text{H}]^+$  Calcd. For  $\text{C}_{30}\text{H}_{42}\text{N}_3\text{O}_2\text{Si}^+$  504.3041 found 504.3051

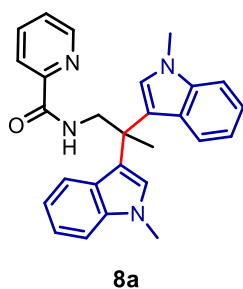

***N*-(2,2-bis(1-methyl-1*H*-indol-3-yl)propyl)picolinamide (8a):** Compound **8a** was synthesized according to GP-4 as yellow oil, 92% yield (97 mg); Eluent: 30-40% ethyl acetate in hexane;  $^1\text{H}$  NMR (400 MHz,  $\text{CDCl}_3$ )  $\delta$  8.38 (d,  $J = 4.7$  Hz, 1H), 8.20 (d,  $J = 7.8$  Hz, 1H), 8.01 (s, 1H), 7.81 (t,  $J = 7.6$  Hz, 1H), 7.40 (d,  $J = 8.1$  Hz, 2H), 7.36 – 7.33 (m, 1H), 7.30 (d,  $J = 8.2$  Hz, 2H), 7.15 (t,  $J = 7.6$  Hz, 2H), 7.03 (s, 2H), 6.89 (t,  $J = 7.5$  Hz, 2H), 4.37 (d,  $J = 6.1$  Hz, 2H), 3.78 (s, 6H), 1.92 (s, 3H) ppm;  $^{13}\text{C}$  NMR (101 MHz,  $\text{CDCl}_3$ )  $\delta$  164.5, 150.1, 148.0, 137.9, 137.4, 126.8, 126.7, 126.0, 122.4, 121.5, 121.3, 119.9, 118.6, 109.3, 48.1, 39.9, 32.9, 26.3 ppm; HRMS (ESI-TOF)  $m/z$ :  $[\text{M}+\text{Na}]^+$  Calcd. For  $\text{C}_{27}\text{H}_{26}\text{N}_4\text{O}^+$  445.1999 found 445.2020.

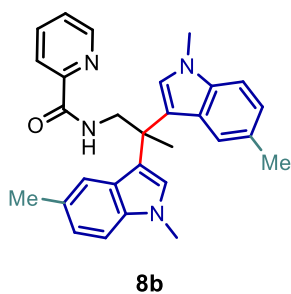

***N*-(2,2-bis(1,5-dimethyl-1*H*-indol-3-yl)propyl)picolinamide (8b):** Compound **8b** was synthesized according to GP-4 as black oil, 86% yield (97 mg); Eluent: 30-40% ethyl acetate in hexane;  $^1\text{H NMR}$  (400 MHz,  $\text{CDCl}_3$ )  $\delta$  8.29 – 8.27 (m, 1H), 8.11 (d,  $J = 7.5$  Hz, 1H), 7.88 (s, 1H), 7.72 (t,  $J = 7.6$  Hz, 1H), 7.26 (s, 2H), 7.18 (s, 1H), 7.12 (d,  $J = 8.3$  Hz, 2H), 6.93 (d,  $J = 8.2$  Hz, 2H), 6.82 (s, 2H), 4.29 (d,  $J = 5.7$  Hz, 2H), 3.65 (s, 6H), 2.26 (s, 6H), 1.84 (s, 3H) ppm;  $^{13}\text{C NMR}$  (101 MHz,  $\text{CDCl}_3$ )  $\delta$  164.6, 150.2, 148.1, 137.2, 136.5, 127.7, 127.4, 126.8, 125.9, 123.0, 122.3, 121.4, 119.2, 109.1, 47.9, 40.1, 32.9, 26.0, 21.7 ppm; **HRMS** (ESI-TOF)  $m/z$ :  $[\text{M}+\text{Na}]^+$  Calcd. For  $\text{C}_{29}\text{H}_{30}\text{N}_4\text{ONa}^+$  473.2312 found 473.2317.

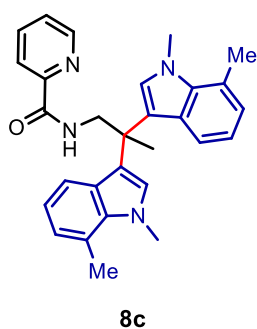

***N*-(2,2-bis(1,7-dimethyl-1*H*-indol-3-yl)propyl)picolinamide (8c):** Compound **8c** was synthesized according to GP-4 as black oil, 82% yield (92 mg); Eluent: 30-40% ethyl acetate in hexane;  $^1\text{H NMR}$  (500 MHz,  $\text{CDCl}_3$ )  $\delta$  8.42 – 8.40 (m, 1H), 8.23 – 8.21 (m, 1H), 8.05 – 8.02 (m, 1H), 7.82 – 7.78 (m, 1H), 7.35 – 7.33 (m, 1H), 7.28 – 7.27 (m, 2H), 6.95 (s, 2H), 6.84 (d,  $J = 7.0$  Hz, 2H), 6.78 – 6.75 (m, 2H), 4.37 (d,  $J = 6.1$  Hz, 2H), 4.06 (s, 6H), 2.77 (s, 6H), 1.91 (s, 3H) ppm;  $^{13}\text{C NMR}$  (126 MHz,  $\text{CDCl}_3$ )  $\delta$  164.5, 150.2, 148.0, 137.2, 136.7, 128.5, 127.8, 125.9, 124.1, 122.3, 121.1, 119.5, 119.4, 118.8, 47.8, 39.6, 36.9, 26.0, 19.9 ppm; **HRMS** (ESI-TOF)  $m/z$ :  $[\text{M}+\text{Na}]^+$  Calcd. For  $\text{C}_{29}\text{H}_{30}\text{N}_4\text{ONa}^+$  473.2312 found 473.2319.

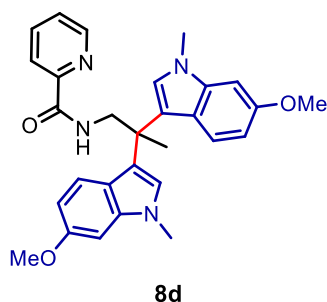

***N*-(2,2-bis(6-methoxy-1-methyl-1*H*-indol-3-yl)propyl)picolinamide (8d):** Compound **8d** was synthesized according to GP-4 as black oil, 87% yield (105 mg); Eluent: 30-40% ethyl acetate in hexane;  $^1\text{H NMR}$  (500 MHz,  $\text{CDCl}_3$ )  $\delta$  8.39 – 8.37 (m, 1H), 8.19 (d,  $J = 8.0$  Hz, 1H), 8.03 – 8.01 (m, 1H), 7.81 – 7.77 (m, 1H), 7.34 – 7.32 (m, 1H), 7.23 (d,  $J = 8.7$  Hz, 2H), 6.93 (s, 2H), 6.74 (d,  $J = 2.3$  Hz, 2H), 6.55 (dd,  $J = 8.7, 2.3$  Hz, 2H), 4.30 (d,  $J = 6.1$  Hz, 2H), 3.83 (s, 6H), 3.73 (s, 6H), 1.86 (s, 3H) ppm;  $^{13}\text{C NMR}$  (126 MHz,  $\text{CDCl}_3$ )  $\delta$  164.5, 153.1, 150.1, 148.0, 137.2, 133.4, 127.3, 127.0, 125.9, 122.3, 119.1, 111.2, 109.8, 103.9, 55.8, 48.0, 39.6, 32.9, 26.0 ppm; **HRMS** (ESI-TOF)  $m/z$ :  $[\text{M}+\text{Na}]^+$  Calcd. For  $\text{C}_{29}\text{H}_{30}\text{N}_4\text{O}_3\text{Na}^+$  505.2210 found 505.2215.

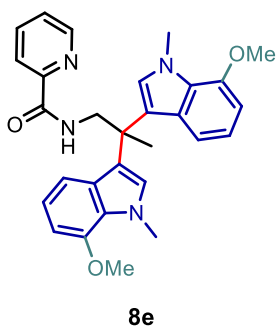

***N*-(2,2-bis(7-methoxy-1-methyl-1*H*-indol-3-yl)propyl)picolinamide (8e):**

Compound **8e** was synthesized according to GP-4 as black oil, 92% yield (111 mg); Eluent: 30-40% ethyl acetate in hexane;  $^1\text{H NMR}$  (400 MHz,  $\text{CDCl}_3$ )  $\delta$  8.40 (d,  $J = 3.9$  Hz, 1H), 8.20 (d,  $J = 7.8$  Hz, 1H), 7.99 (s, 1H), 7.79 (t,  $J = 7.7$  Hz, 1H), 7.35 – 7.32 (m, 1H), 6.99 (d,  $J = 8.1$  Hz, 2H), 6.91 (s, 2H), 6.79 – 6.74 (m, 2H), 6.53 (d,  $J = 7.8$  Hz, 2H), 4.33 (d,  $J = 5.9$  Hz, 2H), 4.05 (s, 6H), 3.90 (s, 6H), 1.87 (s, 3H) ppm;  $^{13}\text{C NMR}$  (101 MHz,  $\text{CDCl}_3$ )  $\delta$  164.6, 150.1, 148.1, 147.8, 137.2, 128.9, 127.9, 127.6, 125.9, 122.3, 119.7, 118.9, 114.3, 102.1, 55.4, 47.7, 39.6, 36.7, 26.0 ppm; **HRMS** (ESI-TOF)  $m/z$ :  $[\text{M}+\text{H}]^+$  Calcd. For  $\text{C}_{29}\text{H}_{31}\text{N}_4\text{O}_3^+$  483.2391 found 483.2396.

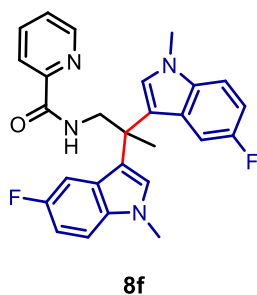

***N*-(2,2-bis(5-fluoro-1-methyl-1*H*-indol-3-yl)propyl)picolinamide (8f):**

Compound **8f** was synthesized according to GP-4 as yellow oil, 76% yield (87 mg); Eluent: 30-40% ethyl acetate in hexane;  $^1\text{H NMR}$  (400 MHz,  $\text{CDCl}_3$ )  $\delta$  8.38 (d,  $J = 4.8$  Hz, 1H), 8.20 (d,  $J = 7.8$  Hz, 1H), 8.05 (s, 1H), 7.79 (t,  $J = 7.7$  Hz, 1H), 7.35 – 7.32 (m, 1H), 7.19 – 7.15 (m, 4H), 6.88 – 6.82 (m, 4H), 4.25 (d,  $J = 6.1$  Hz, 2H), 3.79 (s, 6H), 1.84 (s, 3H) ppm;  $^{13}\text{C NMR}$  (101 MHz,  $\text{CDCl}_3$ )  $\delta$  164.5, 157.0 (d,  $J = 232.9$  Hz), 149.9, 148.1, 137.3, 134.5, 127.8, 126.8 (d,  $J = 9.8$  Hz), 126.1, 122.3, 119.3 (d,  $J = 4.8$  Hz), 109.9, 109.8 (d,  $J = 17.7$  Hz), 105.9 (d,  $J = 23.9$  Hz), 48.2, 39.3, 33.2, 26.2 ppm; **HRMS** (ESI-TOF)  $m/z$ :  $[\text{M}+\text{Na}]^+$  Calcd. For  $\text{C}_{27}\text{H}_{24}\text{F}_2\text{N}_4\text{ONa}^+$  481.1810 found 481.1812.

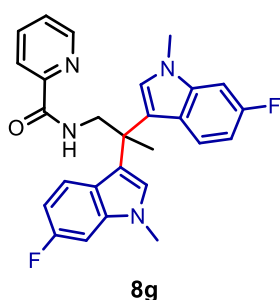

***N*-(2,2-bis(6-fluoro-1-methyl-1*H*-indol-3-yl)propyl)picolinamide (8g):**

Compound **8g** was synthesized according to GP-4 as yellow oil, 75% yield (86 mg); Eluent: 30-40% ethyl acetate in hexane;  $^1\text{H NMR}$  (400 MHz,  $\text{CDCl}_3$ )  $\delta$  8.38 (d,  $J = 4.6$  Hz, 1H), 8.19 (d,  $J = 7.8$  Hz, 1H), 8.01 (s, 1H), 7.80 (t,  $J = 7.7$  Hz, 1H), 7.36 – 7.33 (m, 1H), 7.15 – 7.12 (m, 2H), 7.06 (s, 2H), 6.94 (dd,  $J = 9.8, 2.0$  Hz, 2H), 6.61 – 6.56 (m, 2H), 4.27 (d,  $J = 6.2$  Hz, 2H), 3.74 (s, 6H), 1.85 (s, 3H) ppm;  $^{13}\text{C NMR}$  (101 MHz,  $\text{CDCl}_3$ )  $\delta$  164.5, 159.7 (d,  $J = 237.9$  Hz), 150.0, 148.1, 137.9 (d,  $J = 12.0$  Hz), 137.3, 126.6 (d,  $J = 3.6$  Hz), 126.1, 123.2, 122.3, 122.0 (d,  $J = 9.9$  Hz), 120.0, 107.3 (d,  $J = 24.2$  Hz), 95.6 (d,  $J = 25.8$  Hz), 48.2, 39.6, 33.0, 26.5 ppm; **HRMS** (ESI-TOF)  $m/z$ :  $[\text{M}+\text{Na}]^+$  Calcd. For  $\text{C}_{27}\text{H}_{24}\text{F}_2\text{N}_4\text{ONa}^+$  481.1810 found 481.1815.

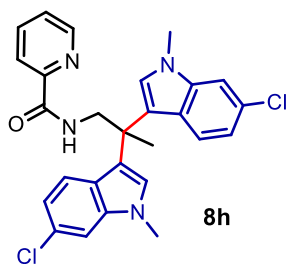

***N*-(2,2-bis(6-chloro-1-methyl-1*H*-indol-3-yl)propyl)picolinamide (8h):**

Compound **8h** was synthesized according to GP-4 as black oil, 72% yield (88 mg); Eluent: 30-40% ethyl acetate in hexane; **<sup>1</sup>H NMR** (400 MHz, CDCl<sub>3</sub>) δ 8.28 (d, *J* = 4.7 Hz, 1H), 8.09 (d, *J* = 7.8 Hz, 1H), 7.90 (s, 1H), 7.71 (t, *J* = 7.8 Hz, 1H), 7.25 (t, *J* = 6.2 Hz, 1H), 7.17 – 7.16 (m, 2H), 7.02 (dd, *J* = 8.7, 1.9 Hz, 2H), 6.97 (s, 2H), 6.69 (d, *J* = 8.5 Hz, 2H), 4.17 (d, *J* = 6.1 Hz, 2H), 3.66 (s, 6H), 1.74 (s, 3H) ppm; **<sup>13</sup>C NMR** (101 MHz, CDCl<sub>3</sub>) δ 164.5, 149.9, 148.1, 138.2, 137.3, 127.6, 127.0, 126.1, 125.1, 122.3, 122.0, 119.9, 119.3, 109.4, 48.2, 39.6, 33.0, 26.4 ppm; **HRMS** (ESI-TOF) *m/z*: [M+Na]<sup>+</sup> Calcd. For C<sub>27</sub>H<sub>24</sub>Cl<sub>2</sub>N<sub>4</sub>ONa<sup>+</sup> 513.1219 found 513.1228.

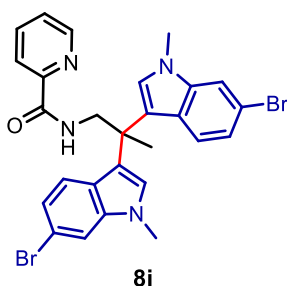

***N*-(2,2-bis(6-bromo-1-methyl-1*H*-indol-3-yl)propyl)picolinamide (8i):**

Compound **8i** was synthesized according to GP-4 as brown solid, 79% yield (115 mg); Eluent: 30-40% ethyl acetate in hexane; **<sup>1</sup>H NMR** (400 MHz, CDCl<sub>3</sub>) δ 8.37 (s, 1H), 8.18 (d, *J* = 7.6 Hz, 1H), 7.98 (s, 1H), 7.81 (t, *J* = 7.4 Hz, 1H), 7.43 (s, 2H), 7.37 – 7.34 (m, 1H), 7.07 – 7.05 (m, 4H), 6.91 (d, *J* = 8.4 Hz, 2H), 4.26 (d, *J* = 5.2 Hz, 2H), 3.75 (s, 6H), 1.83 (s, 3H) ppm; **<sup>13</sup>C NMR** (101 MHz, CDCl<sub>3</sub>) δ 164.5, 149.9, 148.1, 138.6, 137.3, 127.0, 126.1, 125.4, 122.3 (2×C), 121.9, 119.9, 115.3, 112.4, 48.2, 39.6, 33.0, 26.4 ppm; **HRMS** (ESI-TOF) *m/z*: [M+Na]<sup>+</sup> Calcd. For C<sub>27</sub>H<sub>24</sub>Br<sub>2</sub>N<sub>4</sub>ONa<sup>+</sup> 601.0209 found 601.0208.

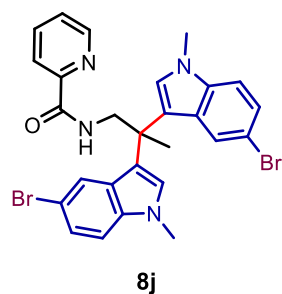

***N*-(2,2-bis(5-bromo-1-methyl-1*H*-indol-3-yl)propyl)picolinamide (8j):**

Compound **8j** was synthesized according to GP-4 as brown solid, 78% yield (113 mg); Eluent: 30-40% ethyl acetate in hexane; **<sup>1</sup>H NMR** (500 MHz, CDCl<sub>3</sub>) δ 8.40 (d, *J* = 4.7 Hz, 1H), 8.19 (d, *J* = 7.8 Hz, 1H), 8.01 – 7.99 (m, 1H), 7.81 – 7.78 (m, 1H), 7.39 (d, *J* = 1.9 Hz, 2H), 7.34 (dd, *J* = 7.5, 4.8 Hz, 1H), 7.21 (dd, *J* = 8.7, 1.8 Hz, 2H), 7.14 (d, *J* = 8.7 Hz, 2H), 7.07 (s, 2H), 4.25 (d, *J* = 6.2 Hz, 2H), 3.76 (s, 6H), 1.86 (s, 3H) ppm; **<sup>13</sup>C NMR** (126 MHz, CDCl<sub>3</sub>) δ 164.5, 150.0, 148.2, 137.3, 136.6, 128.2, 127.7, 126.0, 124.4, 123.5, 122.3, 119.2, 112.2, 111.0, 48.4, 39.6, 33.1, 26.4 ppm; **HRMS** (ESI-TOF) *m/z*: [M+Na]<sup>+</sup> Calcd. For C<sub>27</sub>H<sub>24</sub>Br<sub>2</sub>N<sub>4</sub>ONa<sup>+</sup> 601.0209 found 601.0195.

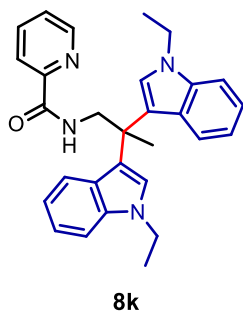

***N*-(2,2-bis(1-ethyl-1*H*-indol-3-yl)propyl)picolinamide (8k):** Compound **8k** was synthesized according to GP-4 as yellow oil, 74% yield (83 mg); Eluent: 30-40% ethyl acetate in hexane;  $^1\text{H NMR}$  (400 MHz,  $\text{CDCl}_3$ )  $\delta$  8.35 (d,  $J = 4.6$  Hz, 1H), 8.20 (d,  $J = 7.8$  Hz, 1H), 7.98 (s, 1H), 7.82 – 7.78 (m, 1H), 7.39 (d,  $J = 8.0$  Hz, 2H), 7.35 – 7.31 (m, 3H), 7.16 – 7.12 (m, 4H), 6.88 (t,  $J = 7.5$  Hz, 2H), 4.37 (d,  $J = 6.1$  Hz, 2H), 4.19 (q,  $J = 7.2$  Hz, 4H), 1.92 (s, 3H), 1.48 (t,  $J = 7.2$  Hz, 6H) ppm;  $^{13}\text{C NMR}$  (101 MHz,  $\text{CDCl}_3$ )  $\delta$  164.5, 150.2, 148.0, 137.3, 136.9, 126.8, 126.0, 125.1, 122.3, 121.5, 121.2, 119.9, 118.5, 109.4, 47.7, 41.0, 39.9, 26.2, 15.7 ppm; **HRMS** (ESI-TOF)  $m/z$ :  $[\text{M}+\text{Na}]^+$  Calcd. For  $\text{C}_{29}\text{H}_{30}\text{N}_4\text{ONa}^+$  473.2312 found 473.2311.

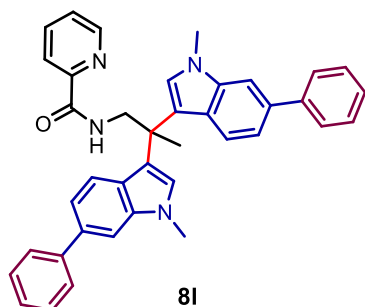

***N*-(2,2-bis(1-methyl-6-phenyl-1*H*-indol-3-yl)propyl)picolinamide (8l):** Compound **8l** was synthesized according to GP-4 as yellow oil, 81% yield (116 mg); Eluent: 30-40% ethyl acetate in hexane;  $^1\text{H NMR}$  (500 MHz,  $\text{CDCl}_3$ )  $\delta$  8.39 (d,  $J = 4.2$  Hz, 1H), 8.22 (d,  $J = 7.8$  Hz, 1H), 8.08 – 8.05 (m, 1H), 7.83 – 7.79 (m, 1H), 7.64 (d,  $J = 7.4$  Hz, 4H), 7.51 – 7.49 (m, 4H), 7.43 (t,  $J = 7.7$  Hz, 4H), 7.36 – 7.29 (m, 3H), 7.20 – 7.17 (m, 2H), 7.10 (s, 2H), 4.41 (d,  $J = 6.1$  Hz, 2H), 3.85 (s, 6H), 1.97 (s, 3H) ppm;  $^{13}\text{C NMR}$  (126 MHz,  $\text{CDCl}_3$ )  $\delta$  164.6, 150.2, 148.1, 142.5, 138.5, 137.3, 135.0, 128.8, 127.5 (2 $\times$ C), 126.7, 126.1, 126.0, 122.4, 121.7, 119.9, 118.6, 107.9, 48.2, 40.0, 33.0, 26.4 ppm; **HRMS** (ESI-TOF)  $m/z$ :  $[\text{M}+\text{Na}]^+$  Calcd. For  $\text{C}_{39}\text{H}_{34}\text{N}_4\text{ONa}^+$  597.2625 found 597.2628.

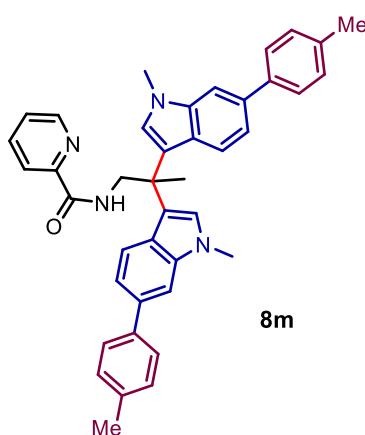

***N*-(2,2-bis(1-methyl-6-(*p*-tolyl)-1*H*-indol-3-yl)propyl)picolinamide (8m):** Compound **8m** was synthesized according to GP-4 as black oil, 85% yield (128 mg); Eluent: 30-40% ethyl acetate in hexane;  $^1\text{H NMR}$  (400 MHz,  $\text{CDCl}_3$ )  $\delta$  8.26 – 8.24 (m, 1H), 8.09 (d,  $J = 7.8$  Hz, 1H), 7.98 – 7.95 (m, 1H), 7.66 (t,  $J = 7.7$  Hz, 1H), 7.42 (d,  $J = 7.8$  Hz, 4H), 7.39 – 7.37 (m, 4H), 7.21 – 7.18 (m, 1H), 7.12 – 7.10 (m, 4H), 7.06 (d,  $J = 8.4$  Hz, 2H), 6.96 (s, 2H), 4.30 (d,  $J = 6.1$  Hz, 2H), 3.69 (s, 6H), 2.27 (s, 6H), 1.85 (s, 3H) ppm;  $^{13}\text{C NMR}$  (101 MHz,  $\text{CDCl}_3$ )  $\delta$  164.6, 150.0, 148.0, 139.6, 138.5, 137.3, 136.3, 134.9, 129.5, 127.34, 127.27, 126.0, 125.8, 122.3, 121.6, 119.8, 118.5, 107.6, 48.1, 39.9, 32.9, 26.3, 21.2 ppm; **HRMS** (ESI-TOF)  $m/z$ :  $[\text{M}+\text{H}]^+$  Calcd. For  $\text{C}_{41}\text{H}_{39}\text{N}_4\text{O}^+$  603.3118 found 603.3124.

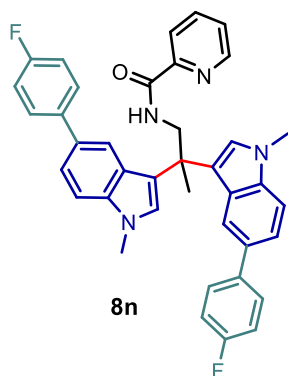

***N*-(2,2-bis(5-(4-fluorophenyl)-1-methyl-1*H*-indol-3-yl)propyl)picolinamide (8n):**

Compound **8n** was synthesized according to GP-4 as yellow oil, 75% yield (115 mg); Eluent: 30-40% ethyl acetate in hexane;  $^1\text{H NMR}$  (400 MHz,  $\text{CDCl}_3$ )  $\delta$  8.38 (d,  $J = 4.3$  Hz, 1H), 8.21 (d,  $J = 7.8$  Hz, 1H), 8.05 (s, 1H), 7.84 – 7.79 (m, 1H), 7.59 – 7.55 (m, 4H), 7.46 (s, 1H), 7.44 – 7.43 (m, 3H), 7.37 – 7.34 (m, 1H), 7.12 – 7.07 (m, 8H), 4.39 (d,  $J = 6.1$  Hz, 2H), 3.84 (s, 6H), 1.95 (s, 3H) ppm;  $^{13}\text{C NMR}$  (101 MHz,  $\text{CDCl}_3$ )  $\delta$  164.6, 162.1 (d,  $J = 245.5$  Hz), 150.2, 148.1, 138.6 (d,  $J = 3.3$  Hz), 138.5, 137.3, 134.0, 128.9 (d,  $J = 7.8$  Hz), 127.5, 126.1, 126.0, 122.4, 121.7, 119.9, 118.5, 115.6 (d,  $J = 21.3$  Hz), 107.8, 48.2, 39.9, 33.0, 26.4 ppm; **HRMS** (ESI-TOF)  $m/z$ :  $[\text{M}+\text{H}]^+$  Calcd. For  $\text{C}_{39}\text{H}_{33}\text{F}_2\text{N}_4\text{O}^+$  611.2617 found 611.2622.

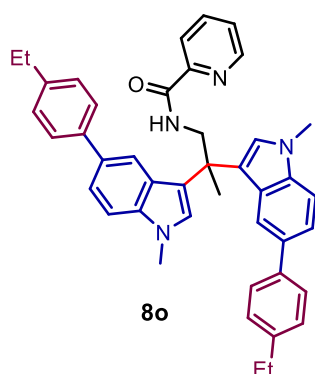

***N*-(2,2-bis(5-(4-ethylphenyl)-1-methyl-1*H*-indol-3-yl)propyl)picolinamide (8o):**

Compound **8o** was synthesized according to GP-4 as yellow oil, 87% yield (137 mg); Eluent: 30-40% ethyl acetate in hexane;  $^1\text{H NMR}$  (500 MHz,  $\text{CDCl}_3$ )  $\delta$  8.15 (d,  $J = 4.3$  Hz, 1H), 8.07 (d,  $J = 7.8$  Hz, 1H), 8.00 – 7.98 (m, 1H), 7.65 – 7.61 (m, 1H), 7.49 (s, 2H), 7.28 (dd,  $J = 8.6, 1.5$  Hz, 2H), 7.22 – 7.20 (m, 6H), 7.15 – 7.12 (m, 1H), 7.07 (d,  $J = 7.9$  Hz, 4H), 6.96 (s, 2H), 4.31 (d,  $J = 6.0$  Hz, 2H), 3.65 (s, 6H), 2.54 (q,  $J = 7.6$  Hz, 4H), 1.89 (s, 3H), 1.14 (t,  $J = 7.6$  Hz, 6H) ppm;  $^{13}\text{C NMR}$  (126 MHz,  $\text{CDCl}_3$ )  $\delta$  164.6, 150.2, 148.1, 142.1, 140.2, 137.5, 137.1, 132.1, 128.1, 127.43, 127.37, 127.2, 125.9, 122.3, 121.3, 120.3, 119.9, 109.5, 48.5, 40.1, 32.9, 28.5, 26.5, 15.7 ppm; **HRMS** (ESI-TOF)  $m/z$ :  $[\text{M}+\text{Na}]^+$  Calcd. For  $\text{C}_{43}\text{H}_{42}\text{N}_4\text{ONa}^+$  653.3251 found 653.3256.

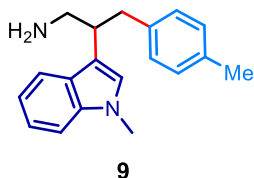

**2-(1-methyl-1*H*-indol-3-yl)-3-(*p*-tolyl)propan-1-amine (9):** Compound **9** was

synthesized according to TP-3 as yellow oil, 97% yield (81 mg);  $^1\text{H NMR}$  (400 MHz,  $\text{CDCl}_3$ )  $\delta$  7.56 (d,  $J = 8.0$  Hz, 1H), 7.20 – 7.18 (m, 1H), 7.13 – 7.12 (m, 1H), 7.03 – 6.98 (m, 1H), 6.94 – 6.93 (m, 4H), 6.73 (s, 1H), 3.61 (s, 3H), 3.15 – 3.08 (m, 1H), 2.98 – 2.77 (m, 4H), 2.19 (s, 3H), 1.83 (s, 2H) ppm;  $^{13}\text{C NMR}$  (101 MHz,  $\text{CDCl}_3$ )  $\delta$  137.7, 137.4, 135.3, 129.0, 128.9, 127.4, 126.7, 121.6, 119.5, 118.8, 115.8, 109.4, 45.8, 42.3, 39.4, 32.7, 21.1 ppm; **HRMS** (ESI-TOF)  $m/z$ :  $[\text{M}+\text{H}]^+$  Calcd. For  $\text{C}_{19}\text{H}_{23}\text{N}_2^+$  279.1856 found 279.1868.

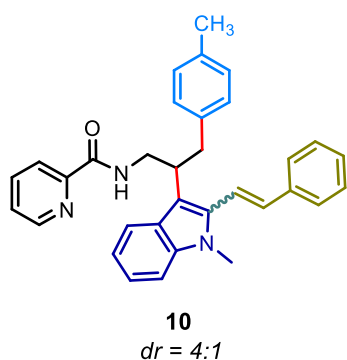

***N*-(2-(1-methyl-2-styryl-1*H*-indol-3-yl)-3-(*p*-tolyl)propyl)picolinamide (10):**

Compound **10** was synthesized according to TP-4 as yellow oil, 62% yield (75 mg); Eluent: 15-25% ethyl acetate in hexane;  $^1\text{H NMR}$  (400 MHz,  $\text{CDCl}_3$ )  $\delta$  8.30 (s, 3.96H), 8.17 (s, 1.01H), 8.06 – 7.99 (m, 3.92H), 7.98 – 7.90 (m, 2.99H), 7.88 (d,  $J$  = 7.5 Hz, 1.14H), 7.84 – 7.72 (m, 5.01H), 7.68 – 7.58 (m, 4.94H), 7.26 – 7.12 (m, 36.03H), 7.10 – 7.02 (m, 5.18H), 6.99 – 6.90 (m, 4.26H), 6.90 – 6.80 (m, 15.45H), 6.82 – 6.76 (m, 4.07H), 6.77 – 6.69 (m, 6.29H), 6.63 (d,  $J$  = 12.1 Hz, 0.93H), 6.30 – 6.17 (m, 4.99H), 4.21 – 4.09 (m, 4.0H), 4.02 – 3.94 (m, 1.0H), 3.74 – 3.63 (m, 4.07H), 3.59 (s, 12.0H), 3.59 – 3.49 (m, 4.02H), 3.48 – 3.39 (m, 1.01H), 3.25 – 3.10 (m, 12.10H), 3.09 – 3.02 (m, 2H), 2.15 (s, 12H), 2.08 (s, 3H) ppm;  $^{13}\text{C NMR}$  (101 MHz,  $\text{CDCl}_3$ )  $\delta$  164.33 (2 $\times$ C), 150.02, 149.97, 147.95 (2 $\times$ C), 139.47, 139.16, 138.34, 138.03, 137.59, 137.46, 137.31, 137.19, 137.13, 137.01, 136.82, 136.55, 135.61, 135.32, 135.24, 135.19, 134.49, 129.02, 128.93, 128.86, 128.71, 128.68, 128.35, 128.32, 127.96, 127.75, 126.49, 126.33, 125.97, 122.23, 121.93, 121.40, 120.46, 120.15, 119.29, 119.20, 118.81, 117.16, 113.44, 112.32, 109.85, 109.58, 43.87, 43.48, 40.81, 40.43, 38.89, 38.70, 31.05, 30.48, 21.09, 21.05 ppm; **HRMS** (ESI-TOF)  $m/z$ :  $[\text{M}+\text{H}]^+$  Calcd. For  $\text{C}_{33}\text{H}_{32}\text{N}_3\text{O}^+$  486.2540 found 486.2544.

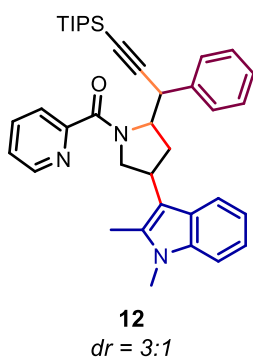

**(4-(1,2-dimethyl-1*H*-indol-3-yl)-2-(1-phenyl-3-(triisopropylsilyl)prop-2-yn-1-yl)pyrrolidin-1-yl)(pyridin-2-yl)methanone (12):**

Compound **12** was synthesized according to TP-5 as yellow oil, 65% yield (58 mg); Eluent: 10-20% ethyl acetate in hexane;  $^1\text{H NMR}$  (500 MHz,  $\text{CDCl}_3$ )  $\delta$  8.61 (d,  $J$  = 4.8 Hz, 1.01H), 8.40 (s, 2.46H), 8.00 (d,  $J$  = 7.9 Hz, 0.98H), 7.81 – 7.78 (m, 3.63H), 7.69 (t,  $J$  = 7.8 Hz, 2.97H), 7.53 (d,  $J$  = 7.4 Hz, 6.20H), 7.40 (d,  $J$  = 6.9 Hz, 2.37H), 7.36 – 7.28 (m, 17.08H), 7.19 – 7.18 (m, 2.06H), 7.12 – 7.09 (m, 4.29H), 7.03 – 7.00 (m, 4.03H), 6.92 – 6.89 (m, 3.99H), 5.55 (d,  $J$  = 8.1 Hz, 1.00H), 5.01 (d,  $J$  = 8.0 Hz, 3.00H), 4.94 (s, 2.98H), 4.30 (s, 1.00H), 3.89 – 3.84 (m, 1.03H), 3.72 (t,  $J$  = 11.0 Hz, 3.02H), 3.64 (t,  $J$  = 10.2 Hz, 2.99H), 3.53 – 3.48 (m, 1.44H), 3.46 (s, 2.99H), 3.43 (s, 9.01H), 2.64 – 2.58 (m, 1.05H), 2.55 – 2.48 (m, 3.02H), 2.31 – 2.26 (m, 4.35H), 2.22 – 2.14 (m, 4.31H), 1.88 (s, 3H), 1.83 (s, 9H), 1.02 – 1.01 (m, 62.98H), 1.00 – 0.98 (m, 21.05H) ppm;  $^{13}\text{C NMR}$  (126 MHz,  $\text{CDCl}_3$ )  $\delta$  167.3, 166.4, 154.9, 154.3, 148.2, 148.1, 138.1 (2 $\times$ C), 137.6, 137.3, 137.1, 137.0, 136.8, 133.6, 133.4, 129.4, 129.0, 128.7, 128.5, 127.6, 127.4, 125.6, 125.5, 125.1, 124.8, 124.6, 123.7, 120.7 (2 $\times$ C), 118.9, 118.8 (3 $\times$ C), 109.6, 109.1, 109.0, 107.9, 107.6, 85.3, 85.1, 64.2, 64.0, 54.4, 53.3, 43.7, 39.4, 34.9, 34.8, 32.1, 31.7, 29.5 (2 $\times$ C), 18.9, 18.8, 11.5, 11.4, 10.1, 10.0 ppm; **HRMS** (ESI-TOF)  $m/z$ :  $[\text{M}+\text{H}]^+$  Calcd. For  $\text{C}_{38}\text{H}_{48}\text{N}_3\text{OSi}^+$  590.3561 found 590.3569.

## 15. NMR spectra of synthesized compounds:

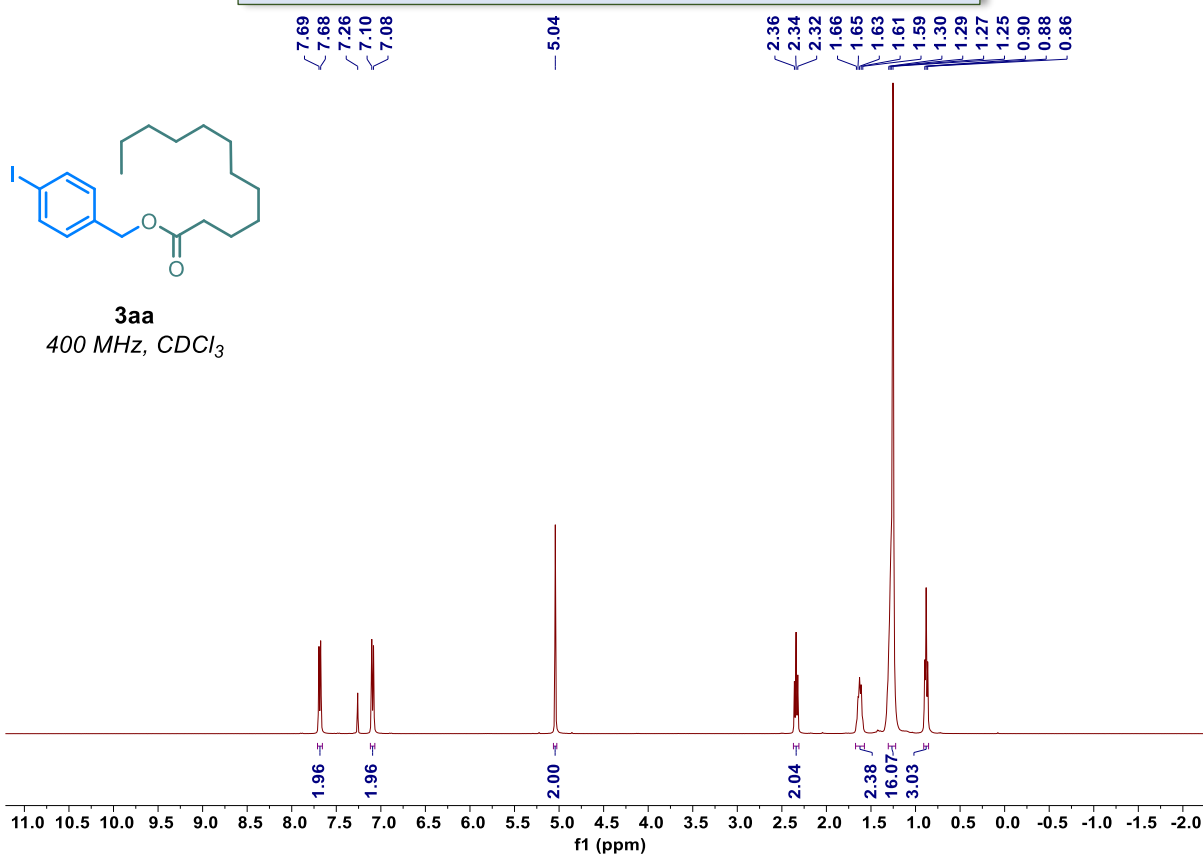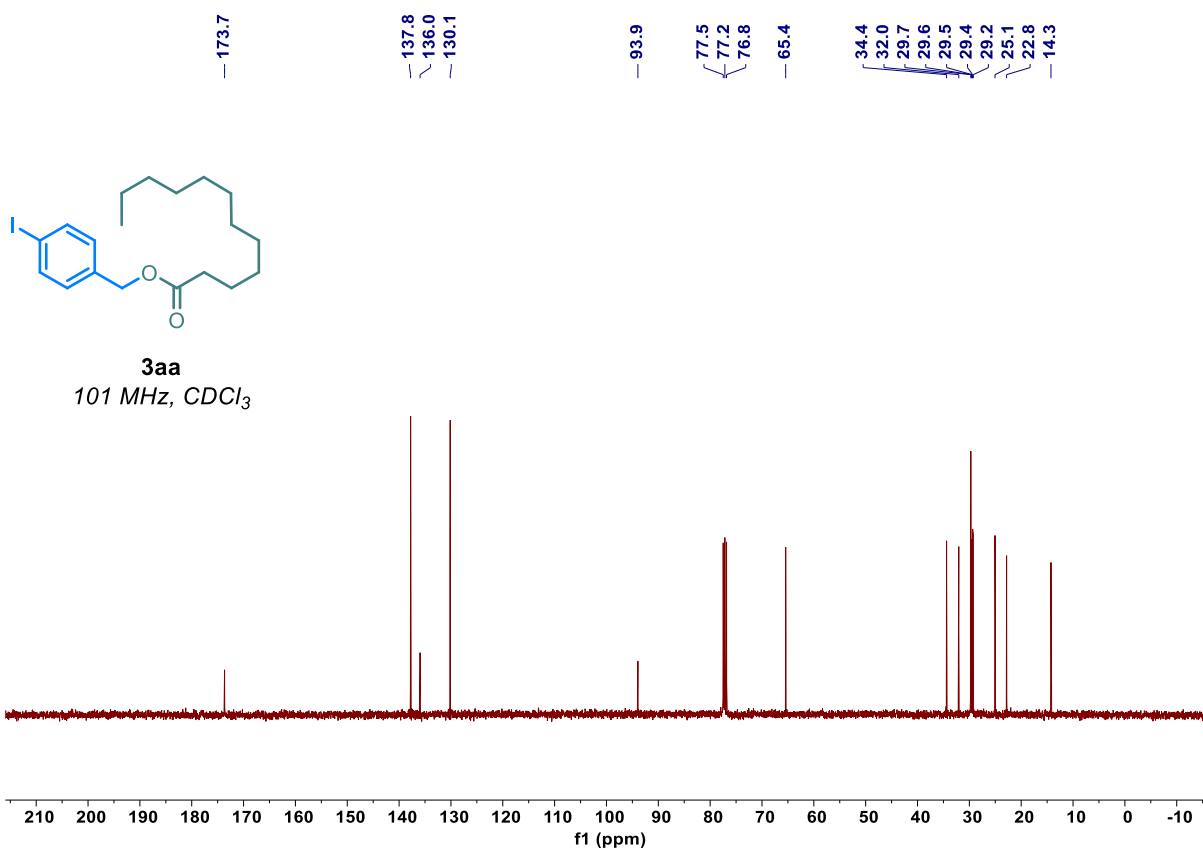



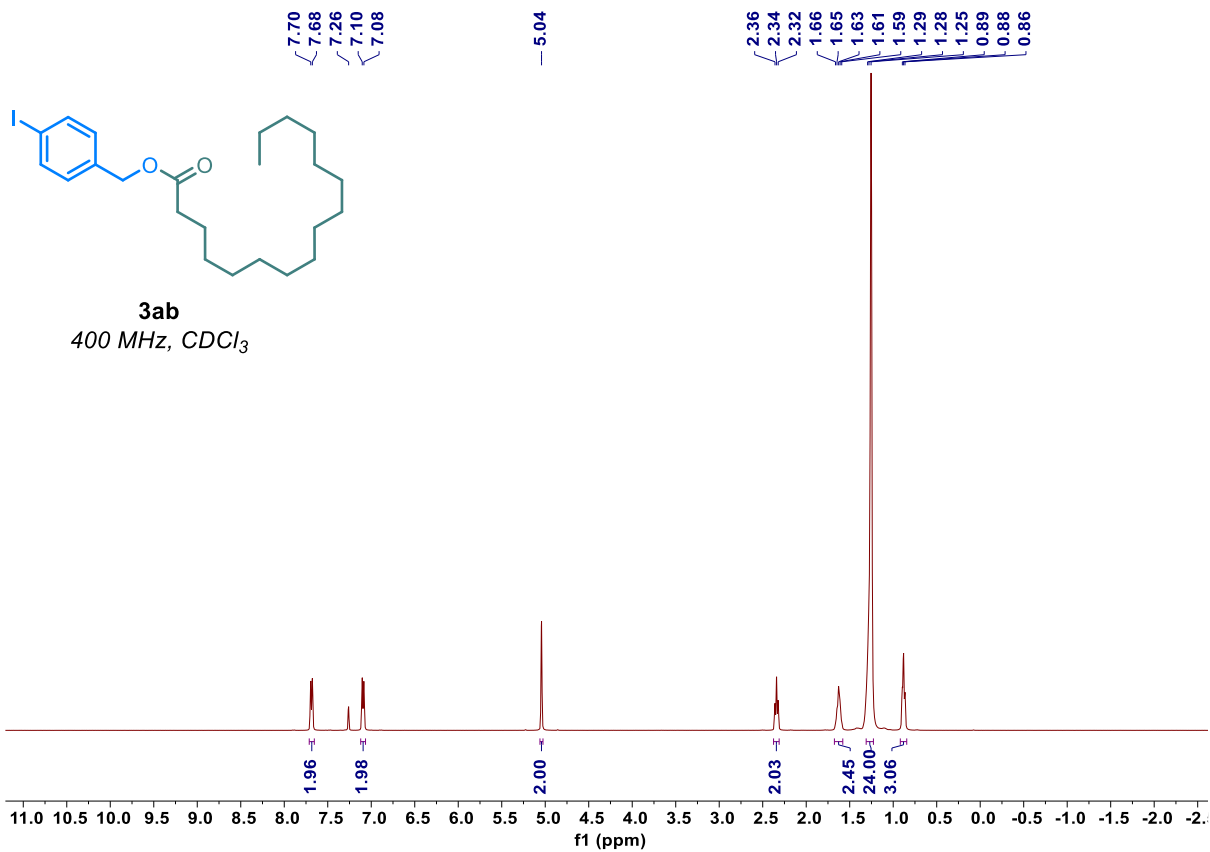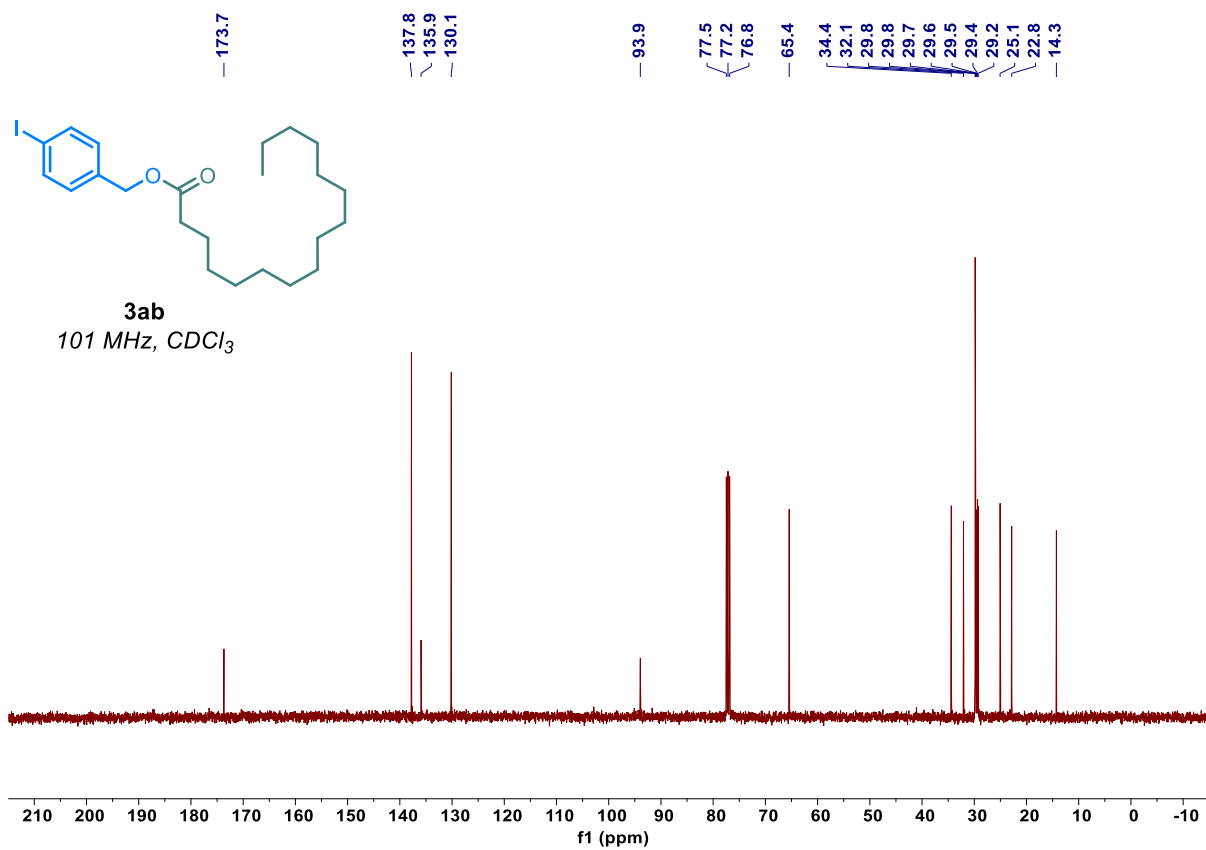

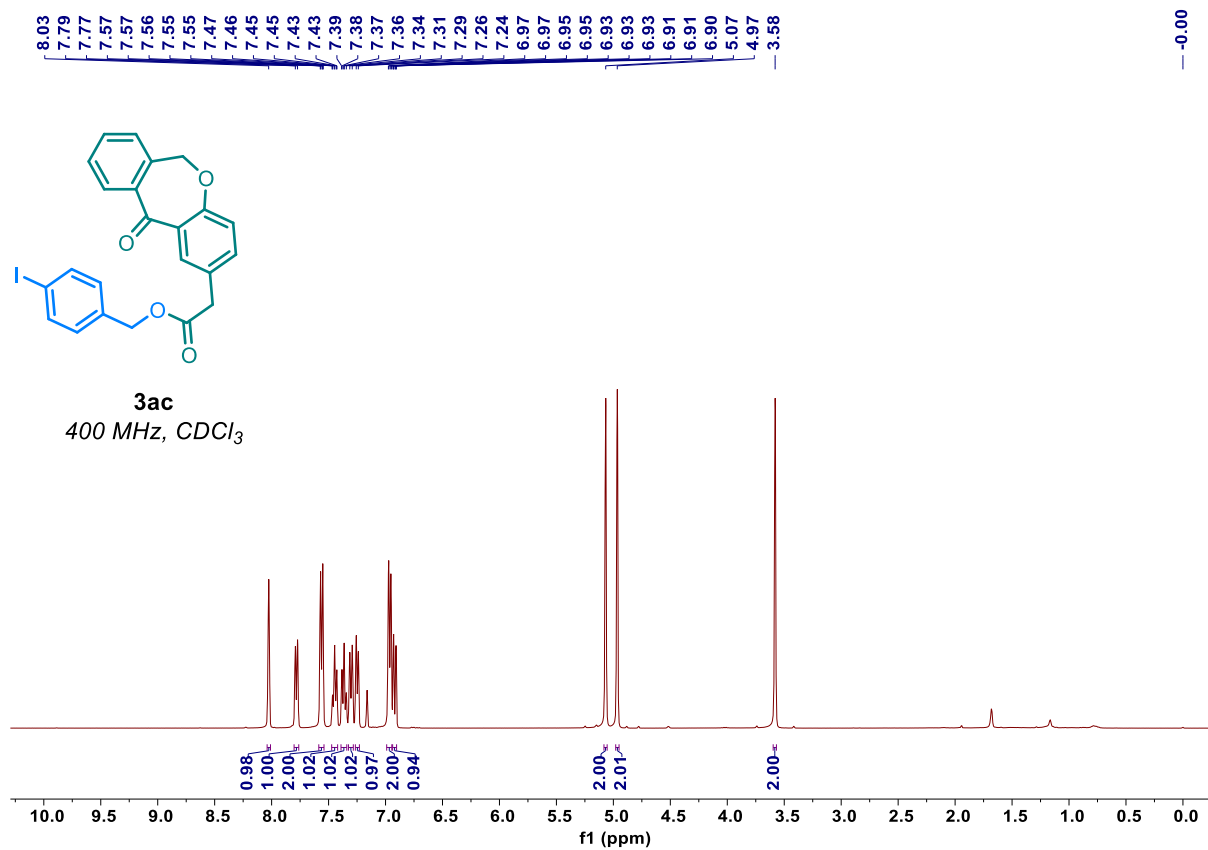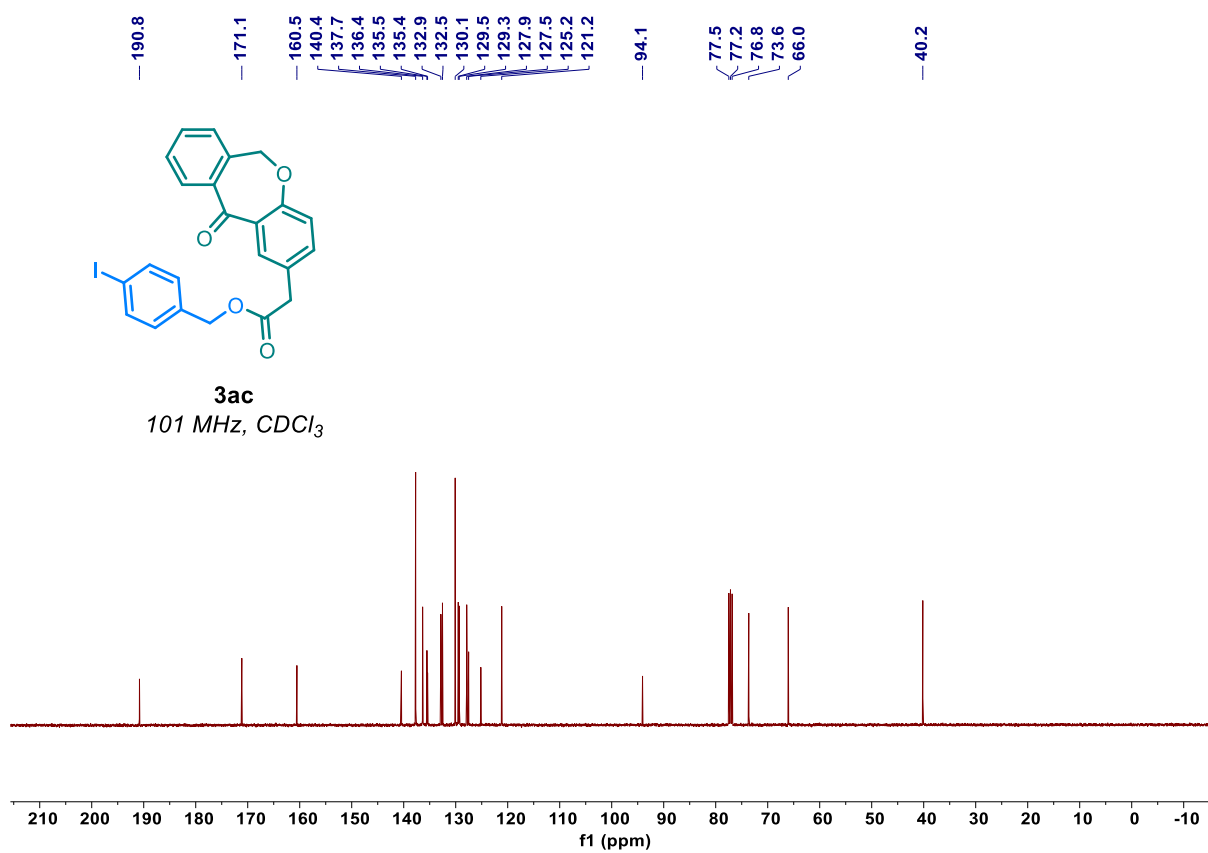

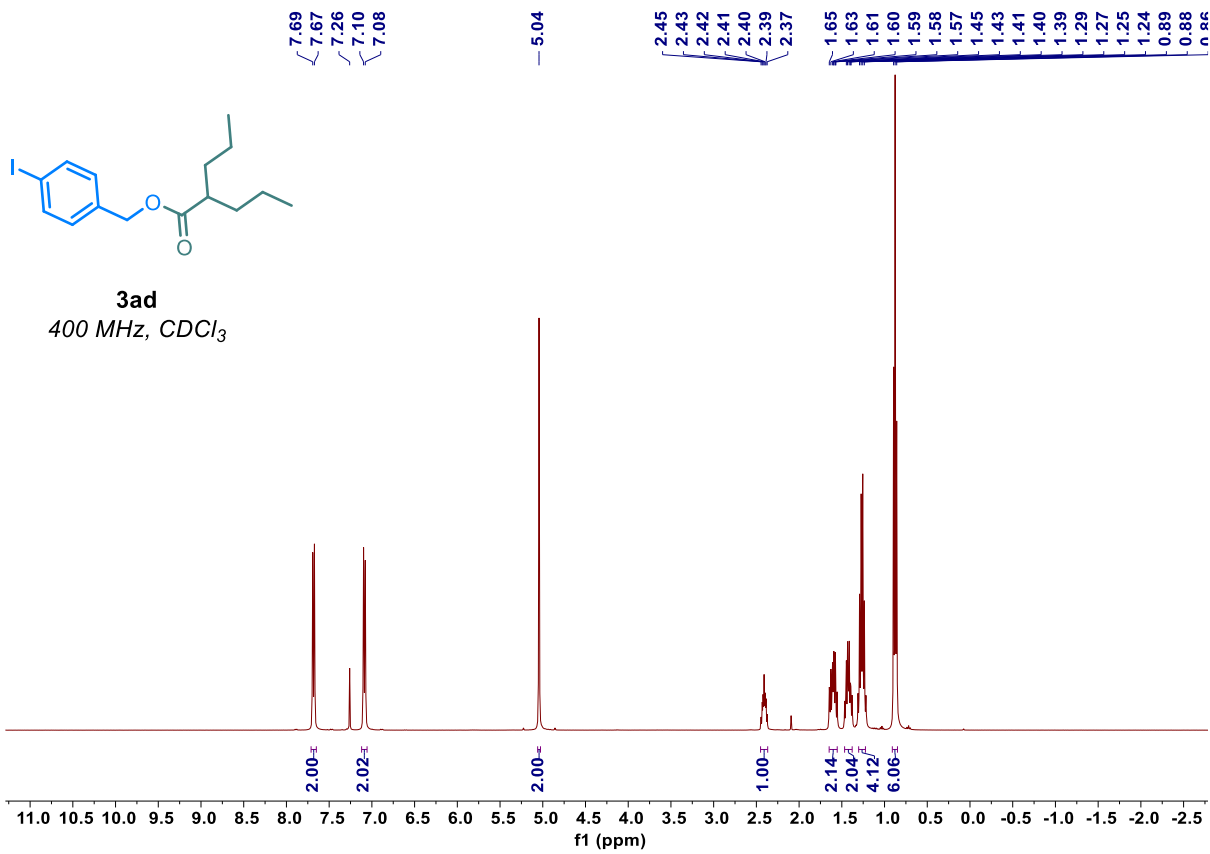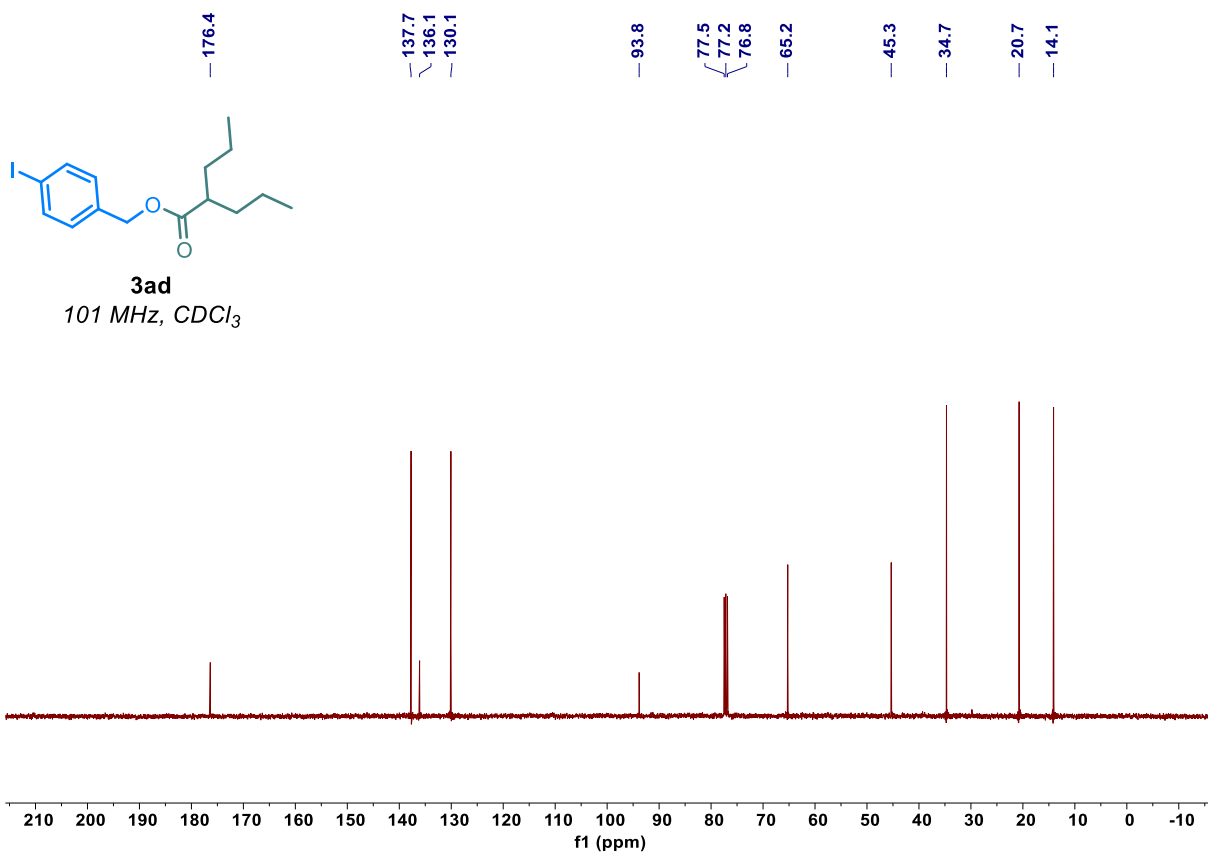

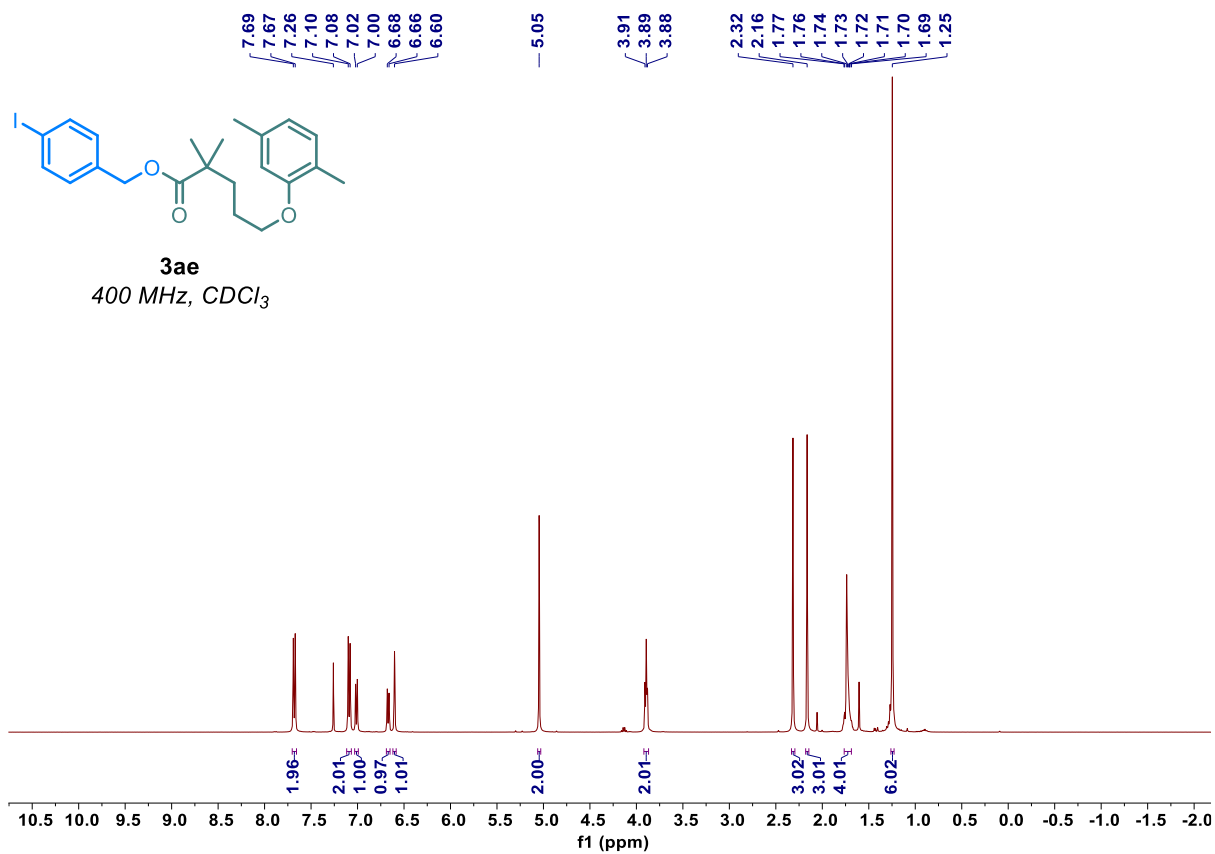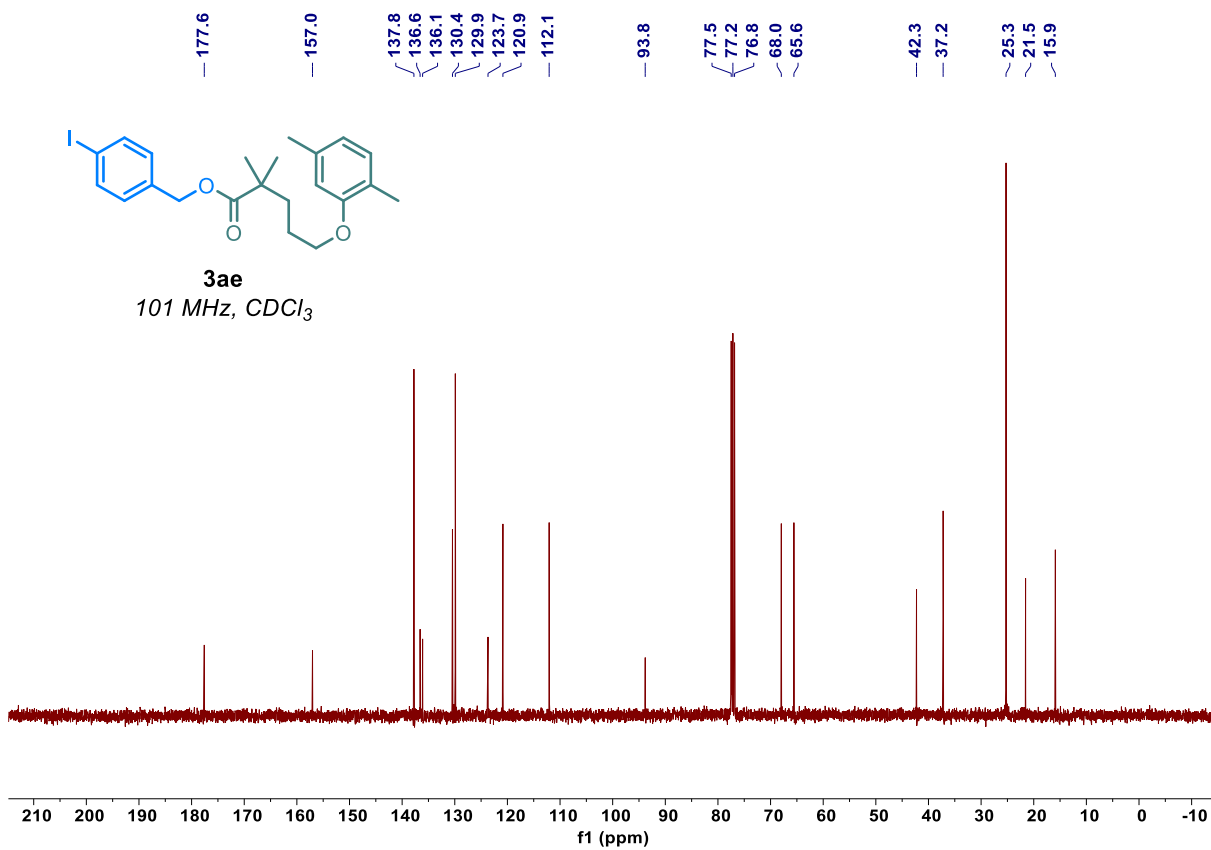

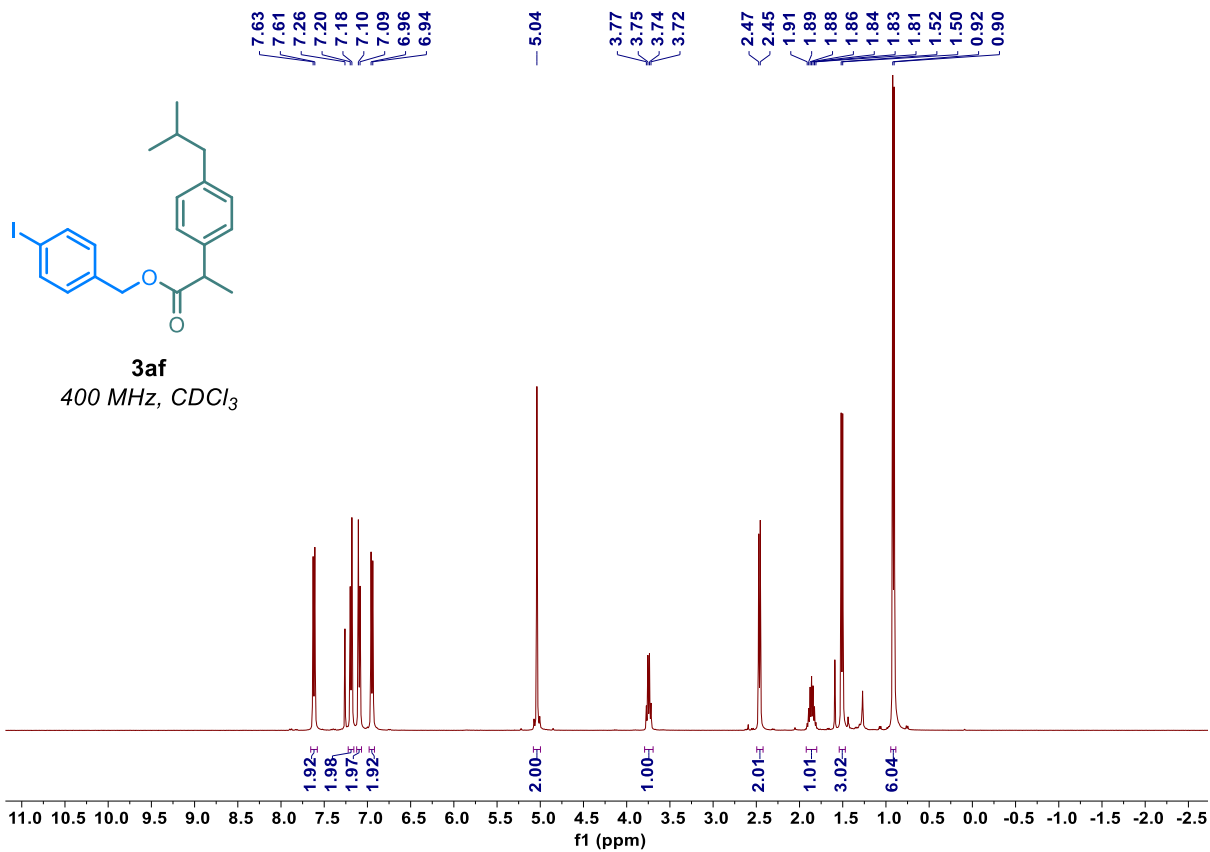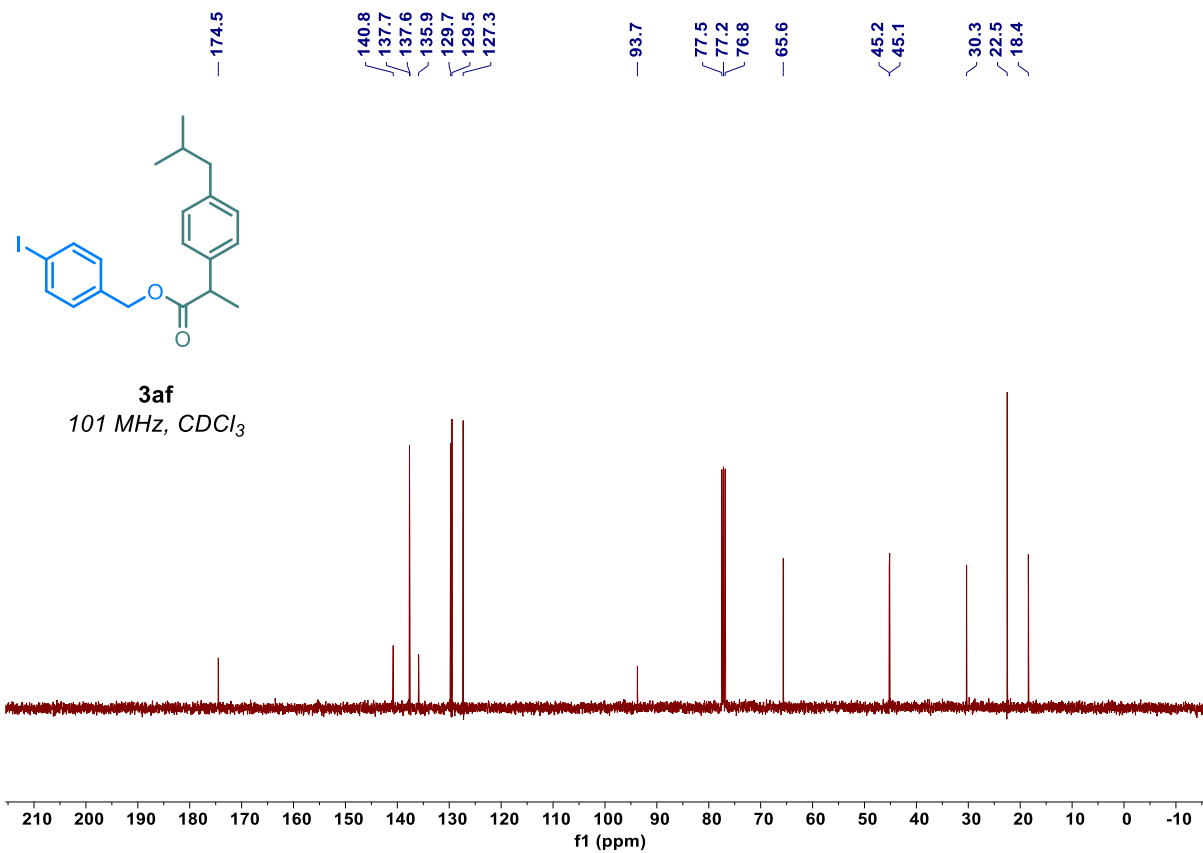

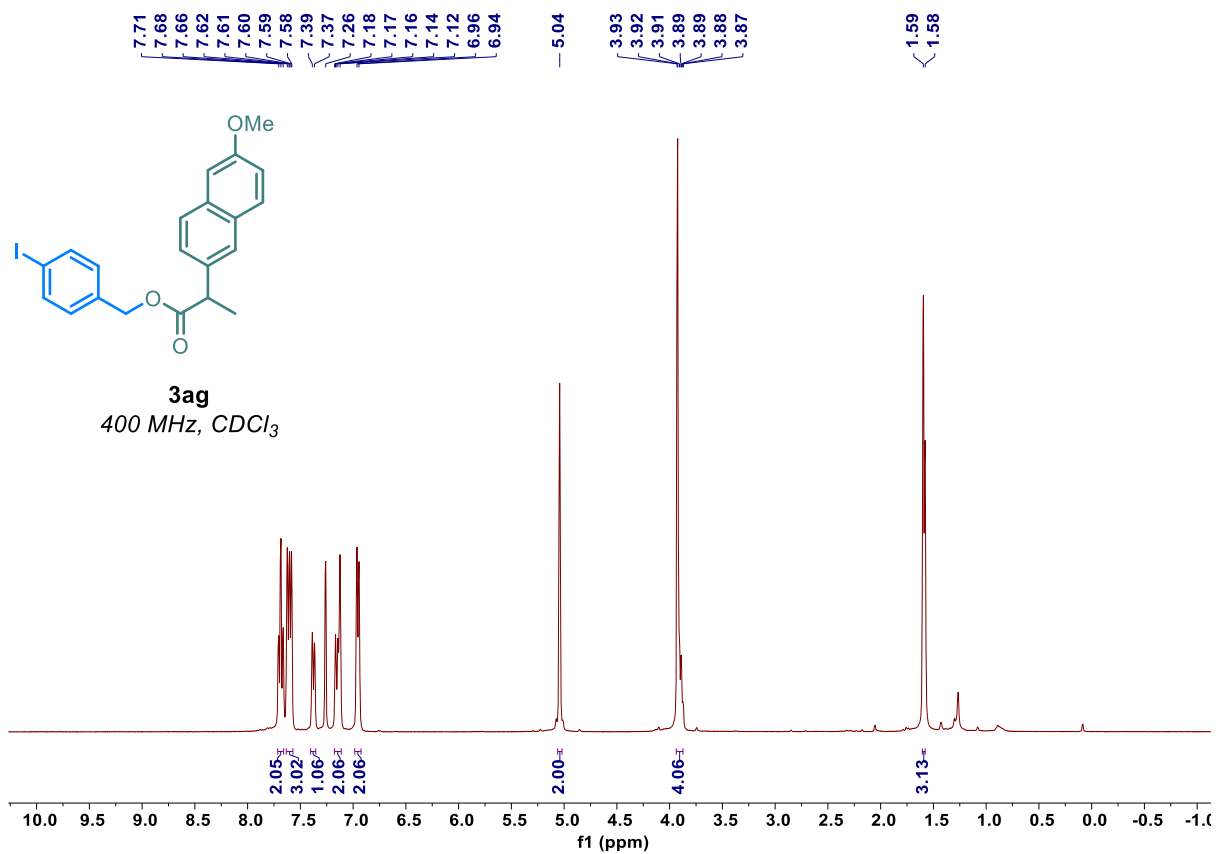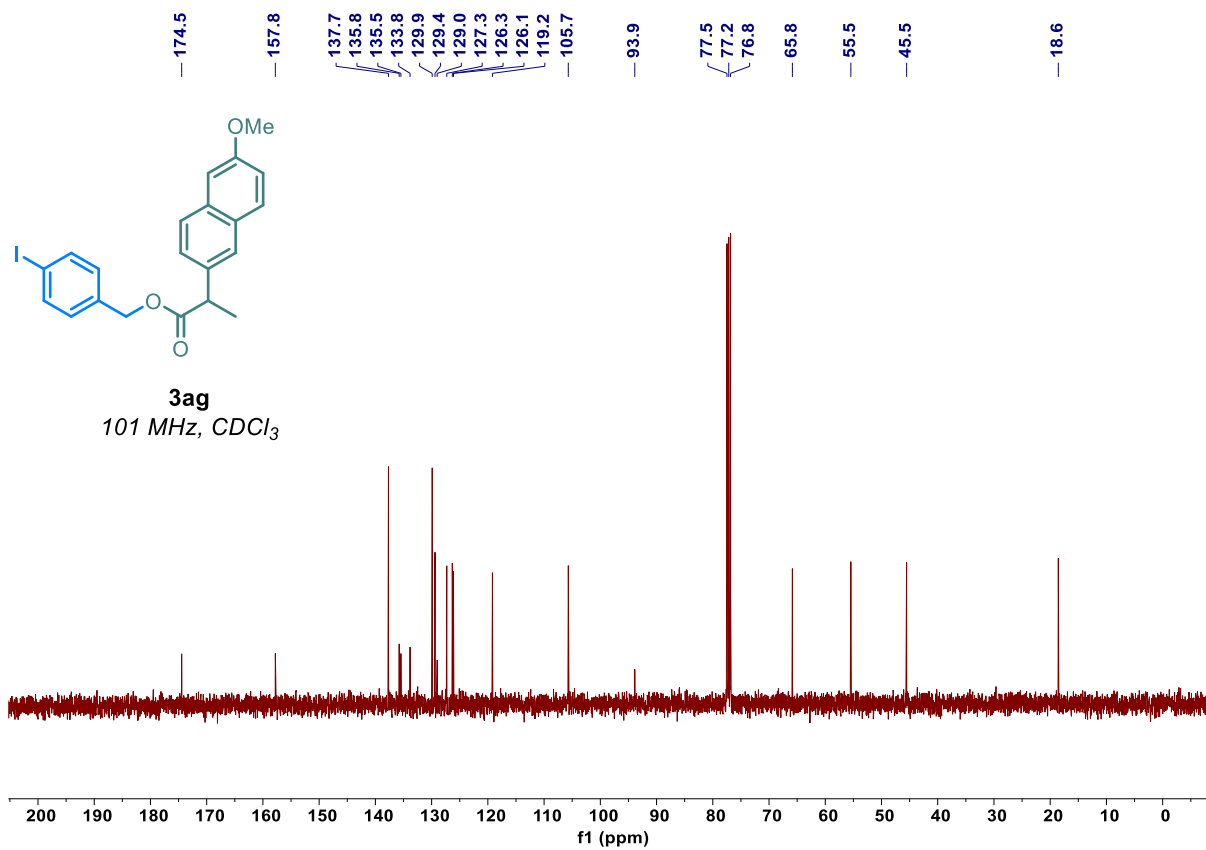

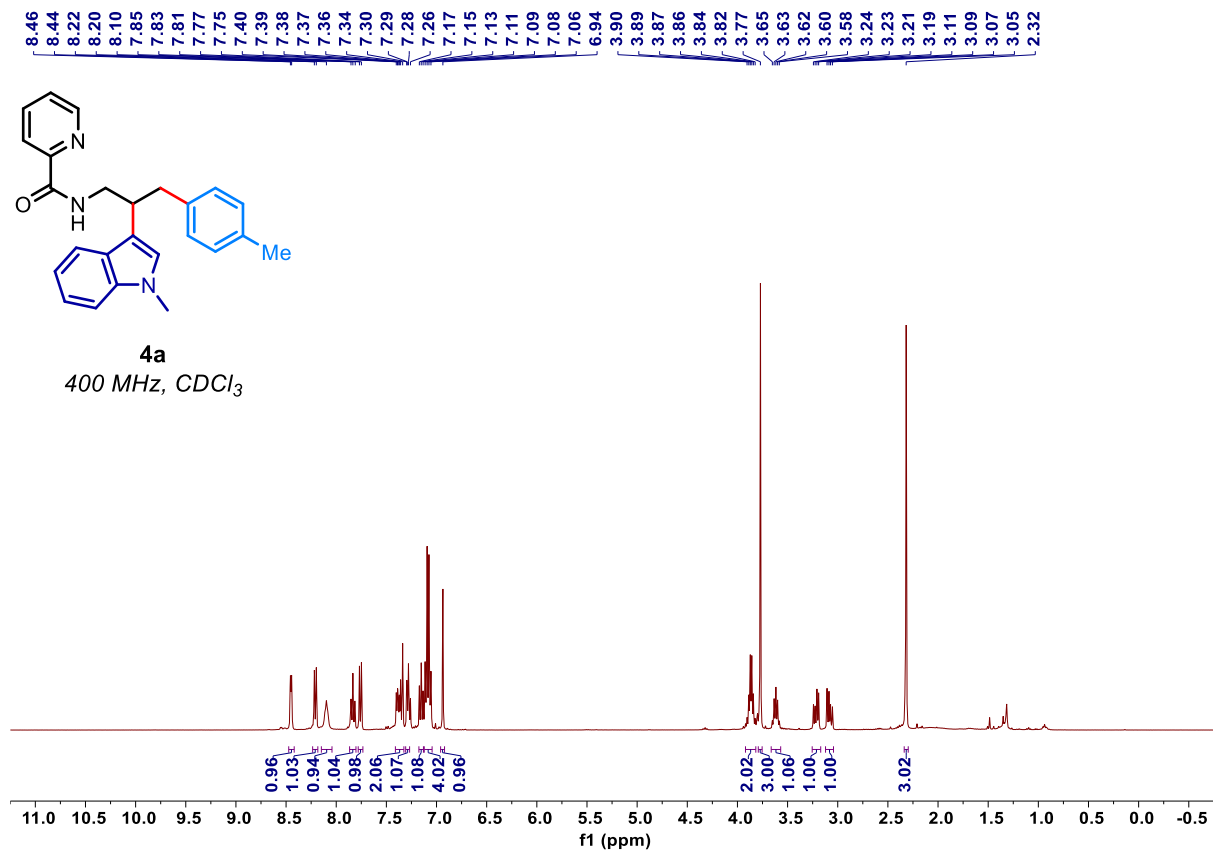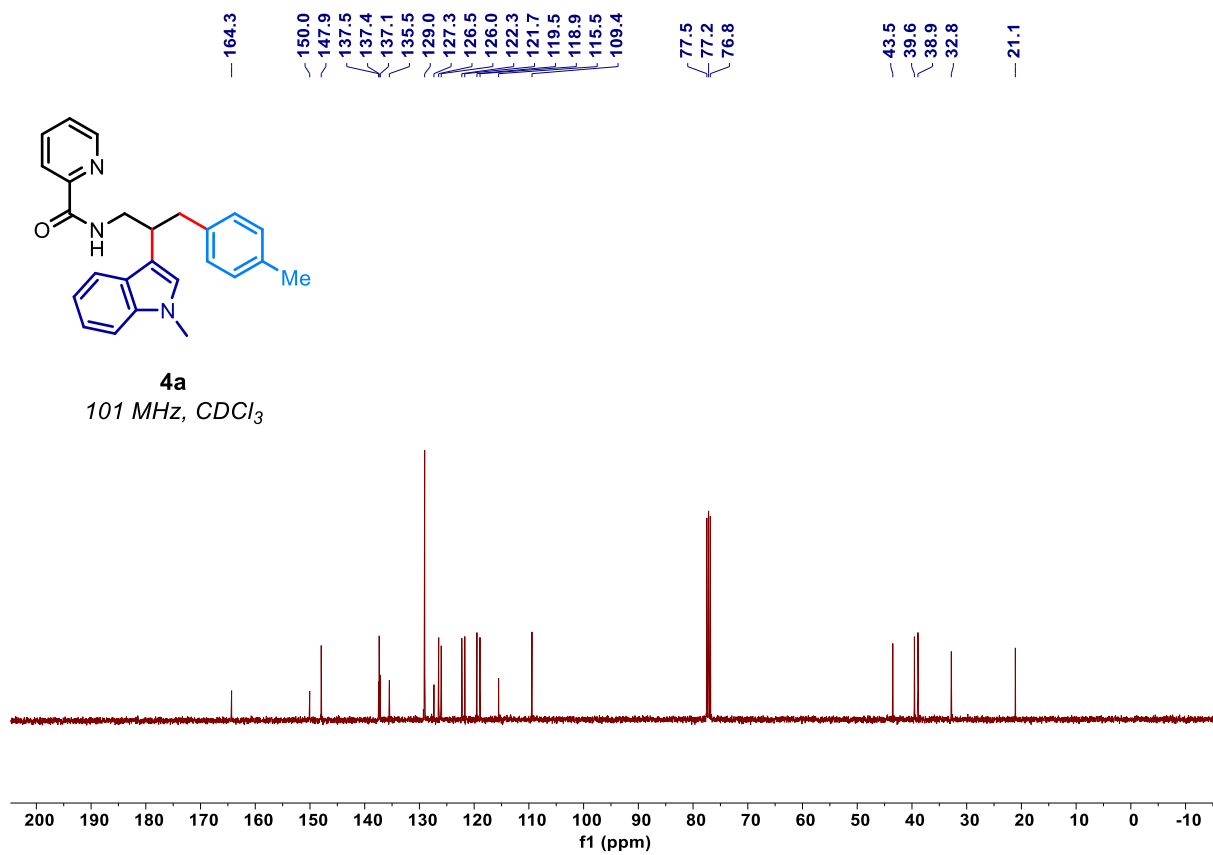

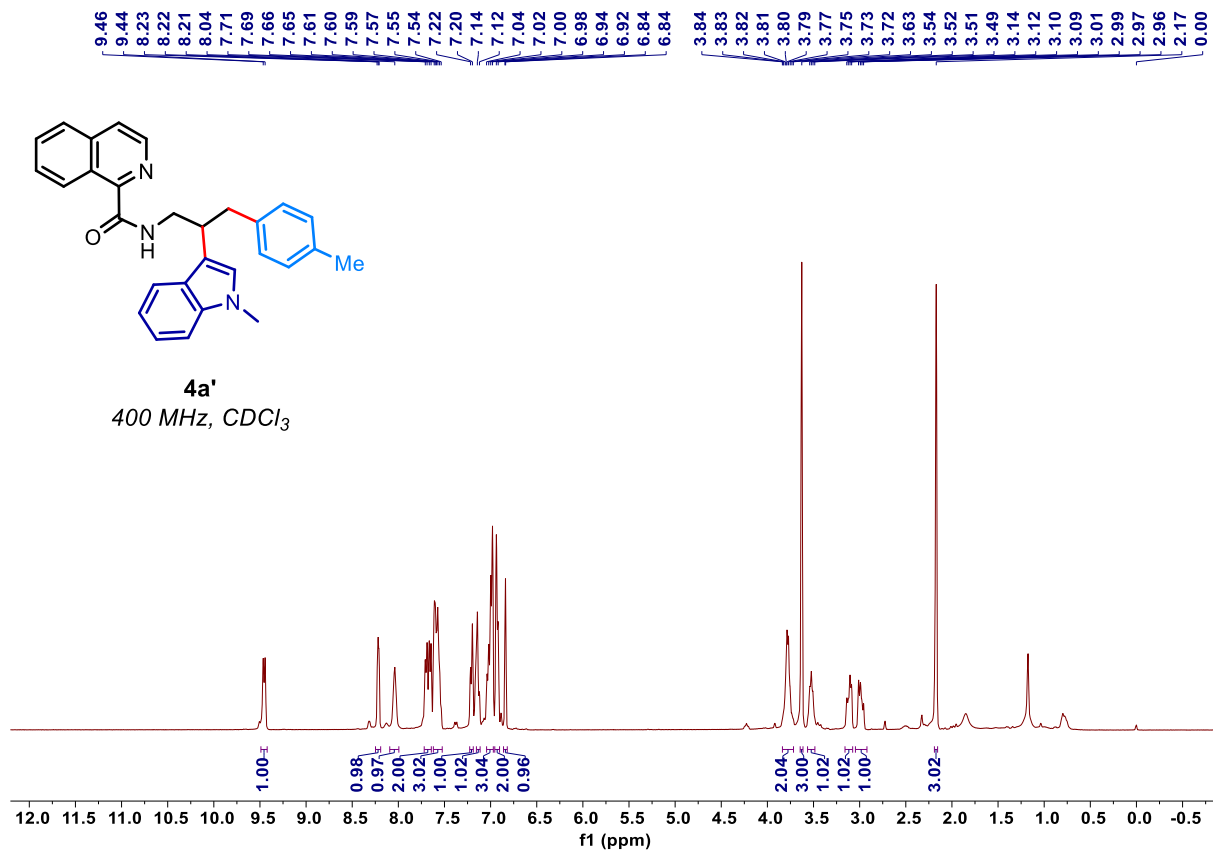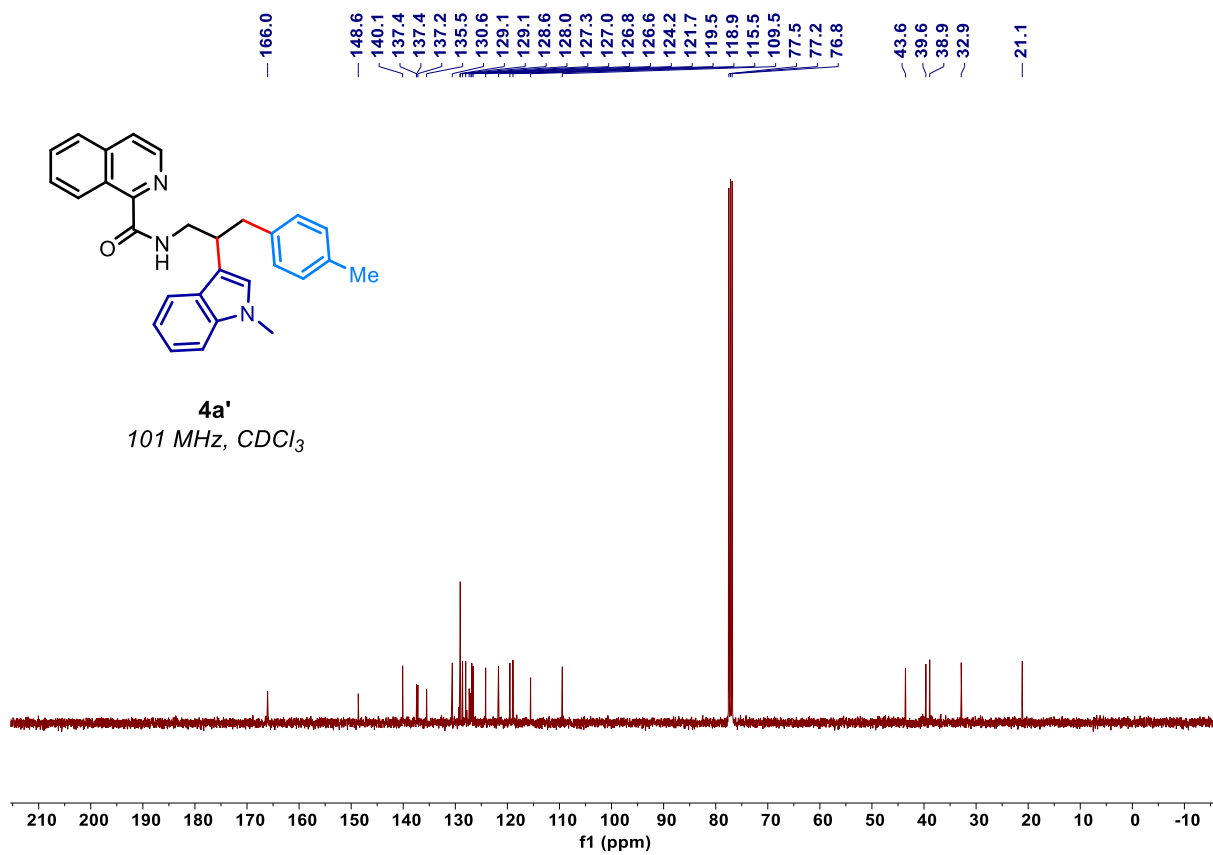



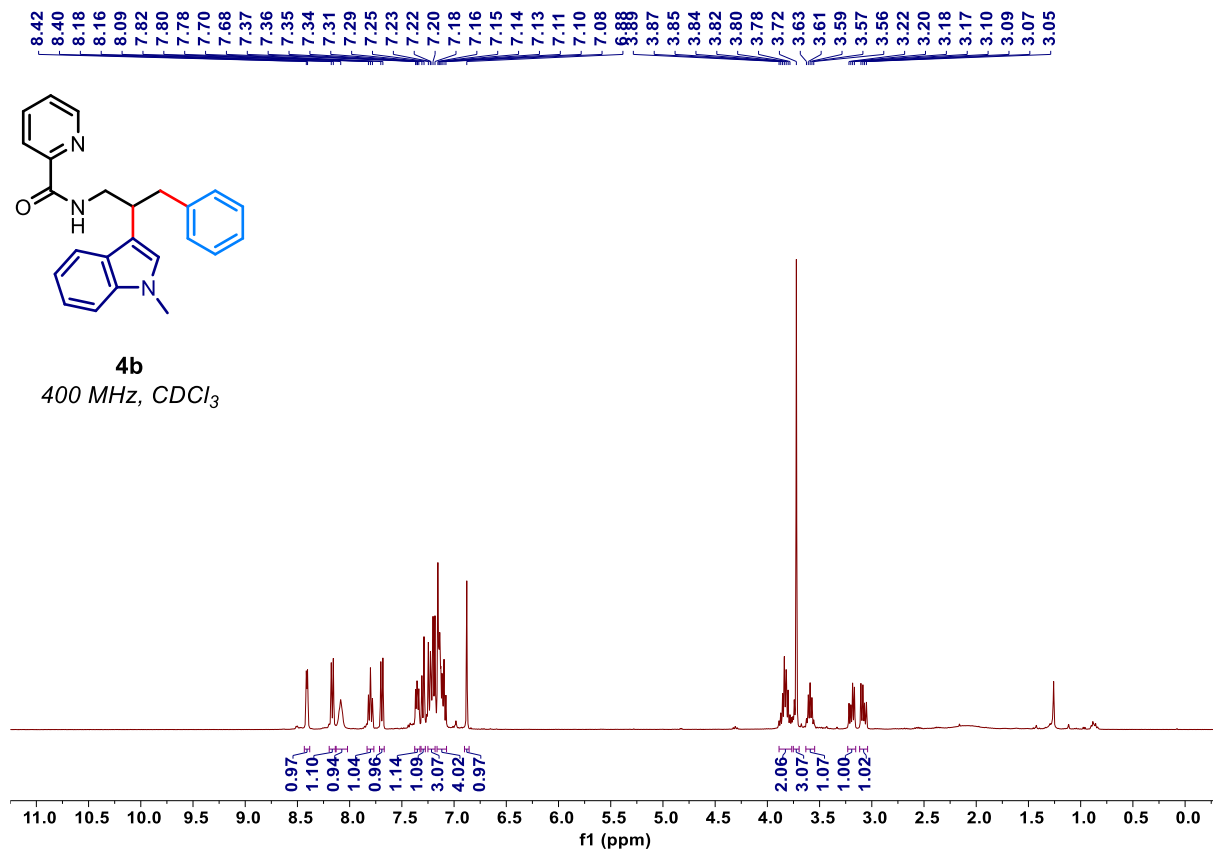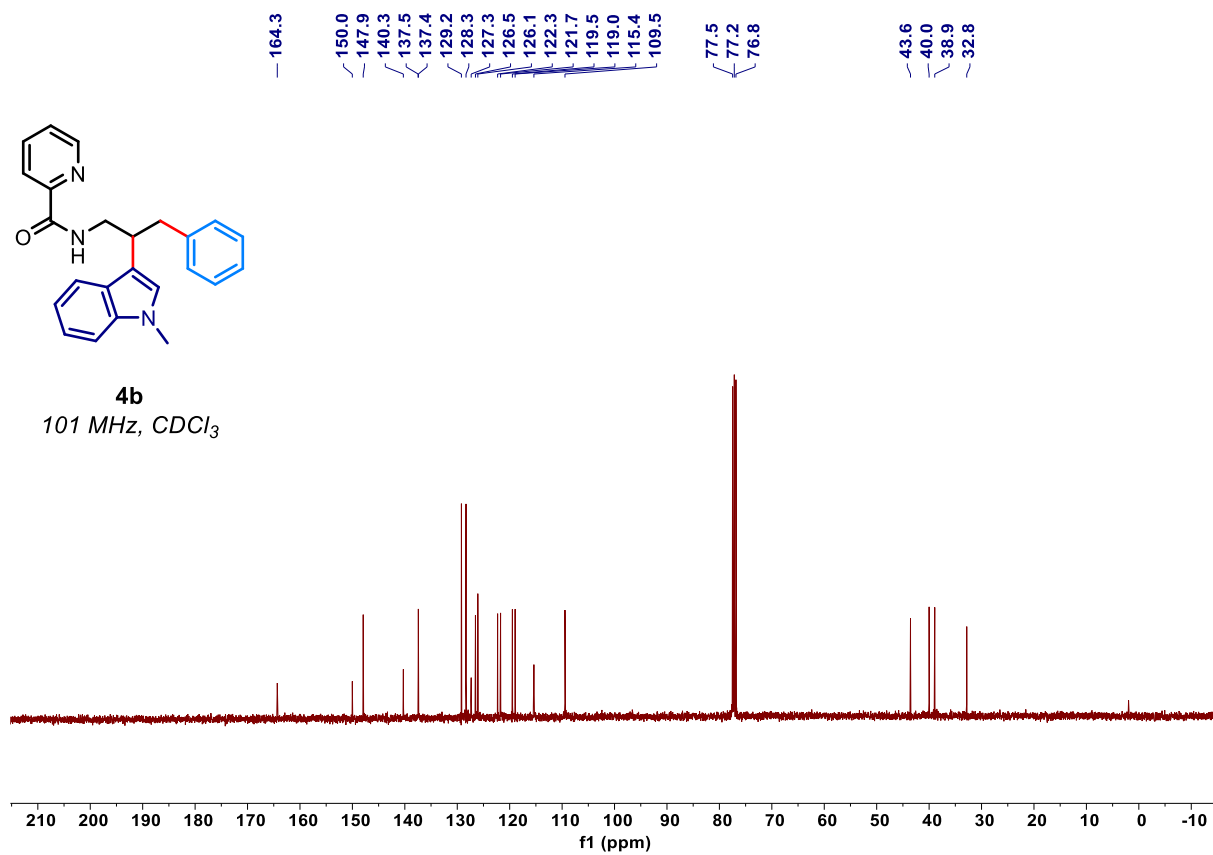

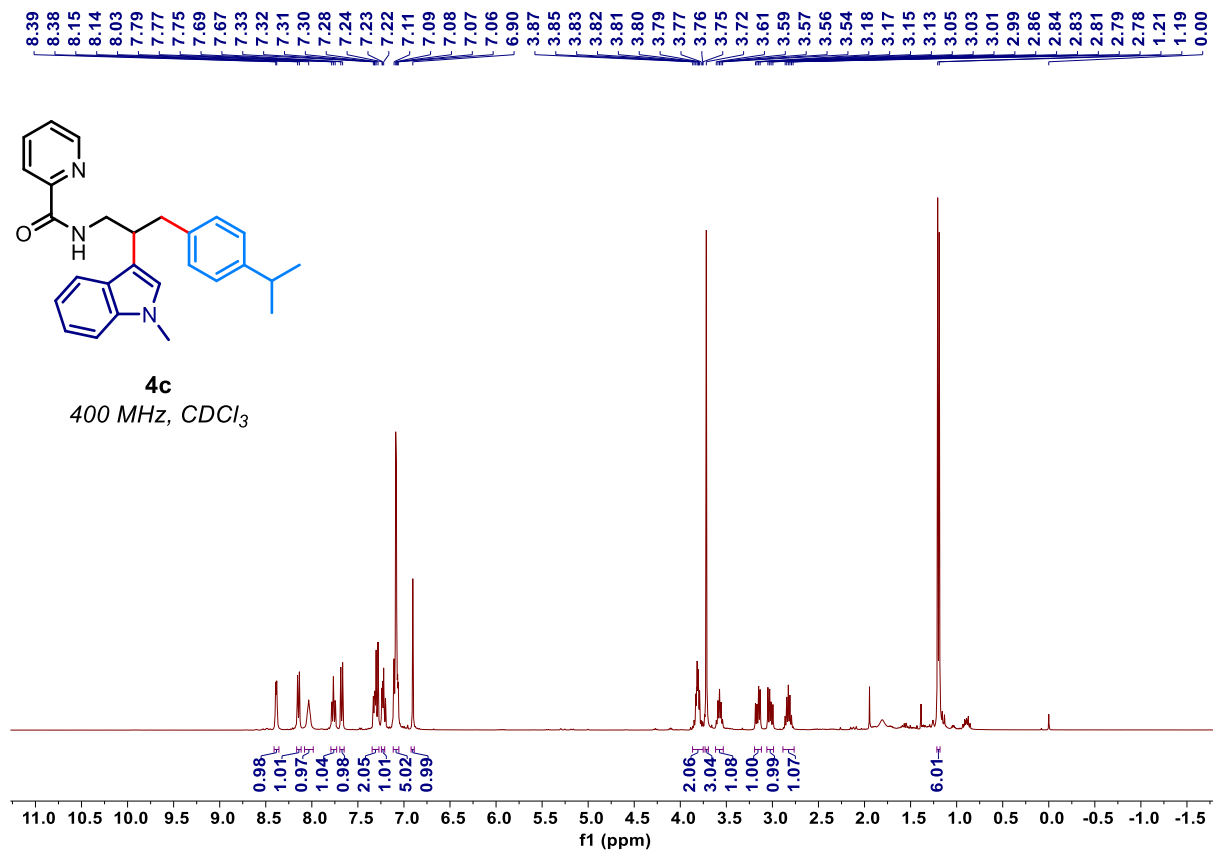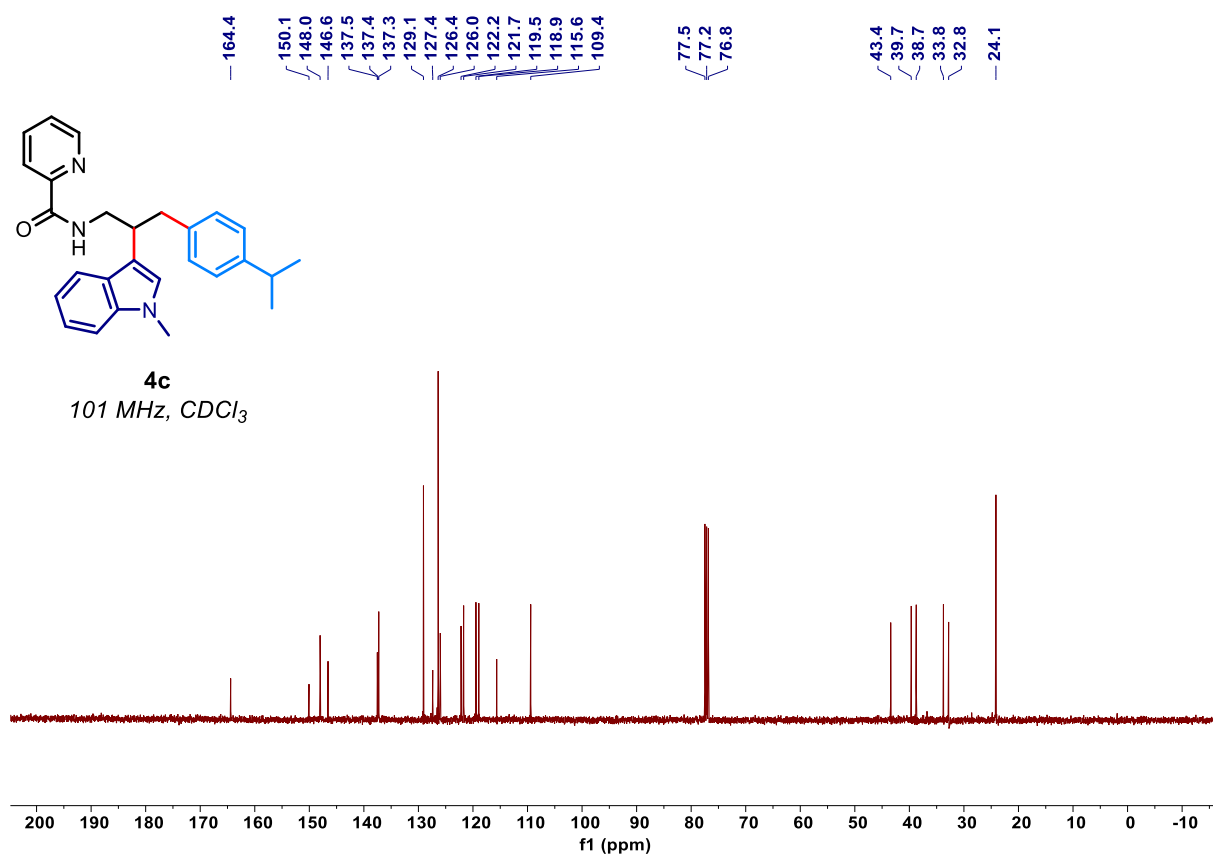

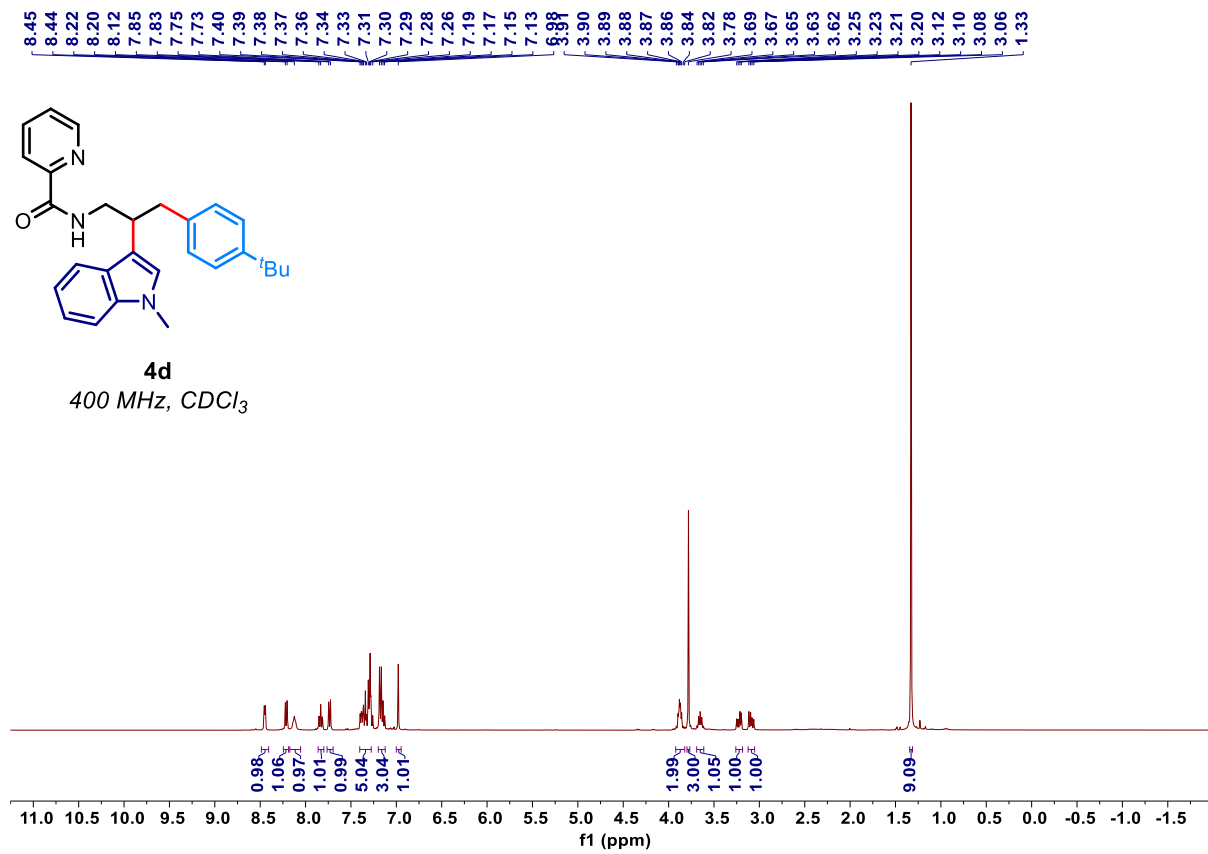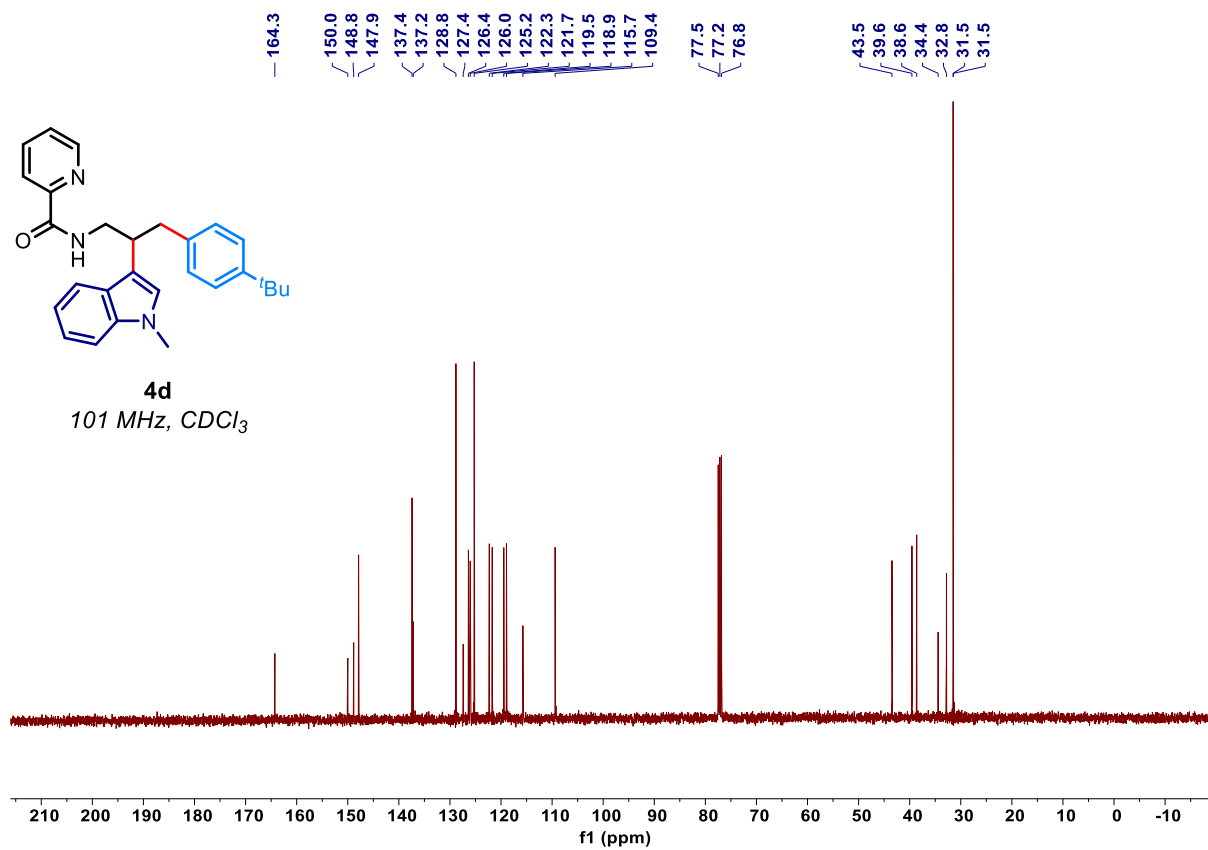

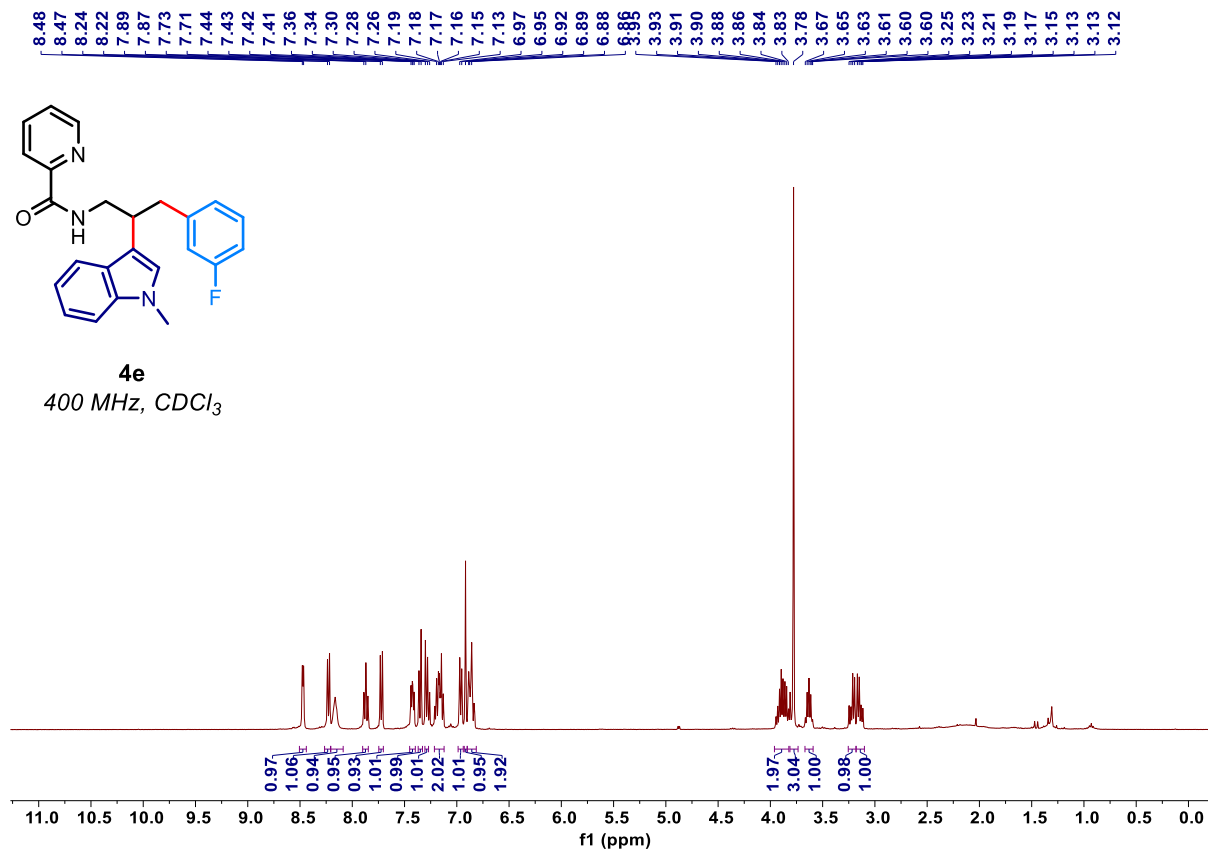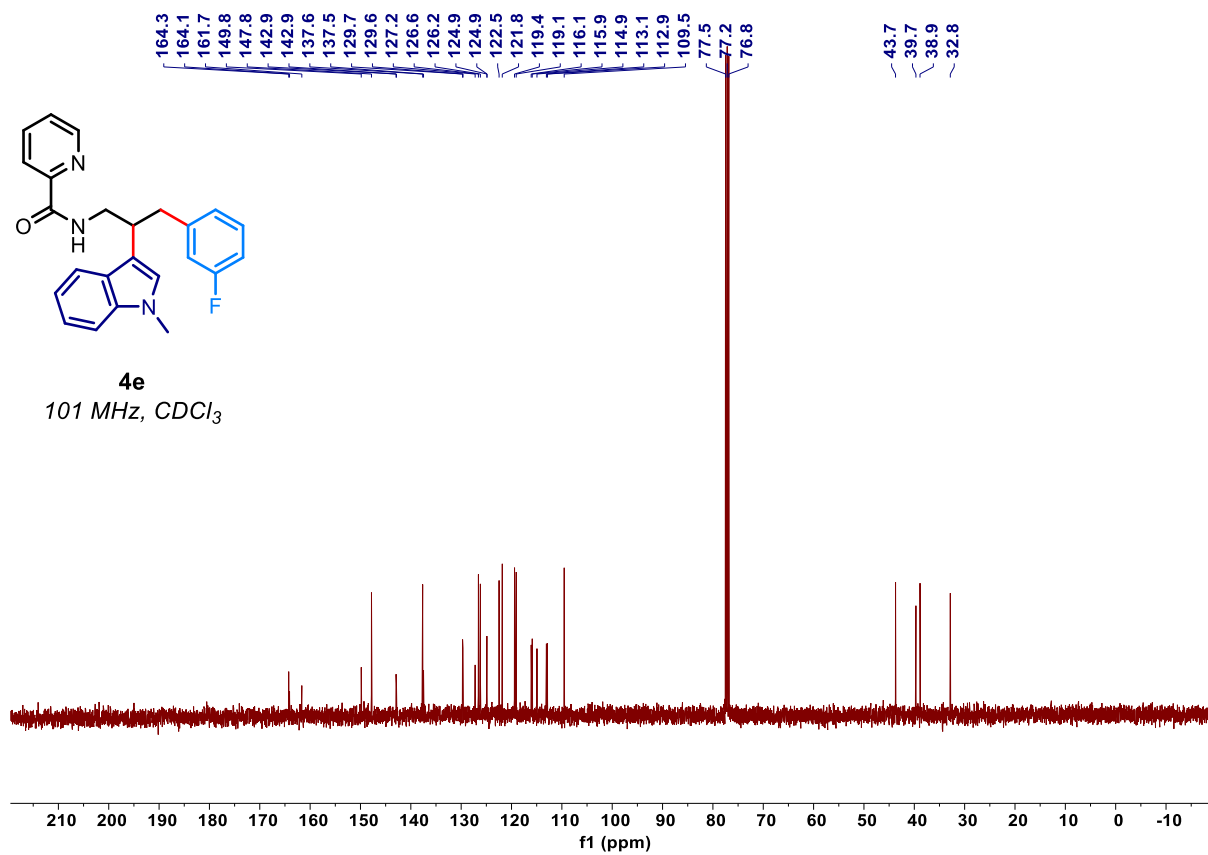

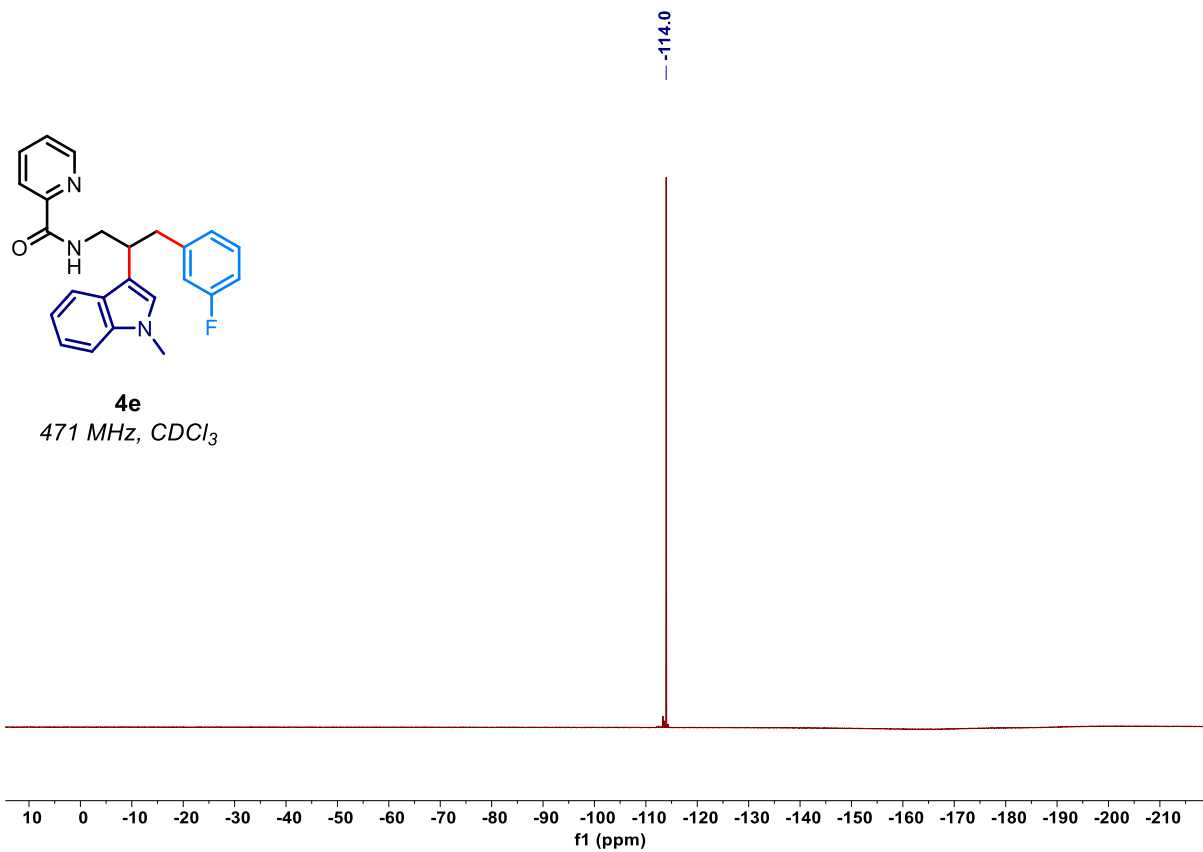

8.47  
8.46  
8.23  
8.21  
8.13  
7.88  
7.86  
7.84  
7.72  
7.70  
7.43  
7.42  
7.41  
7.40  
7.36  
7.34  
7.30  
7.28  
7.26  
7.16  
7.15  
7.12  
7.11  
7.10  
7.09  
7.08  
7.08  
6.93  
6.91  
6.89  
3.94  
3.92  
3.91  
3.89  
3.88  
3.86  
3.85  
3.83  
3.81  
3.77  
3.62  
3.60  
3.58  
3.57  
3.55  
3.22  
3.20  
3.18  
3.16  
3.14  
3.12  
3.10  
3.09

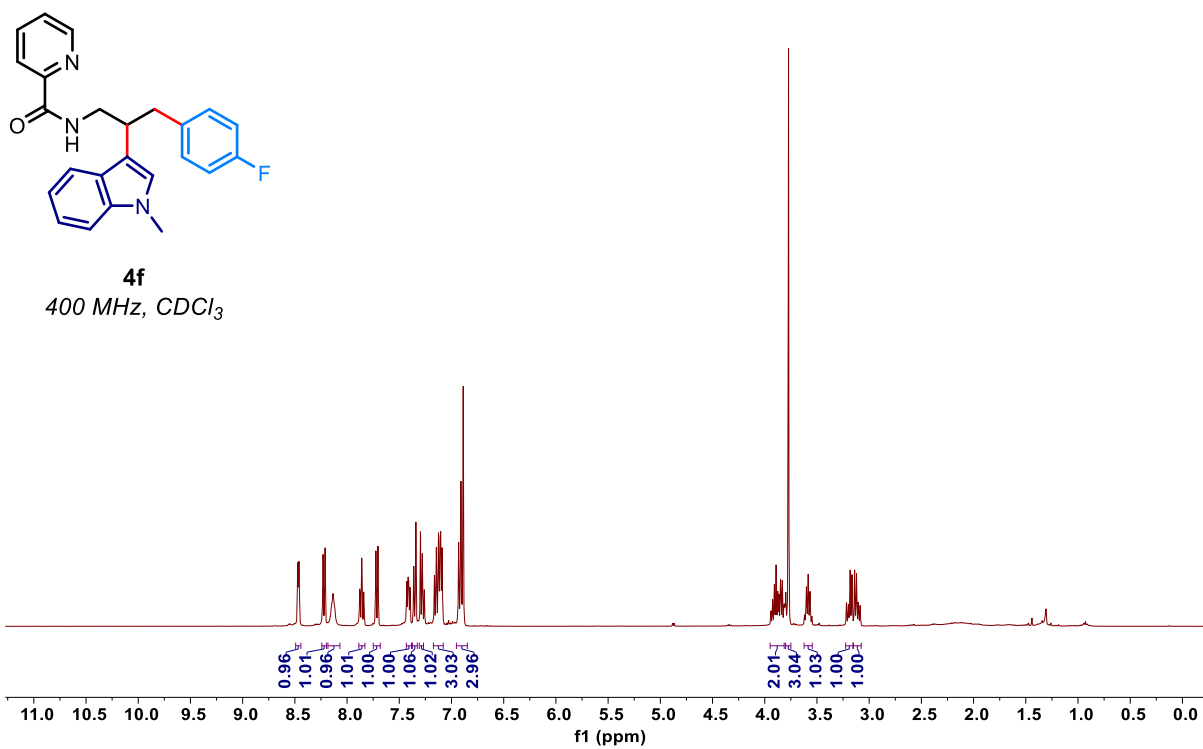

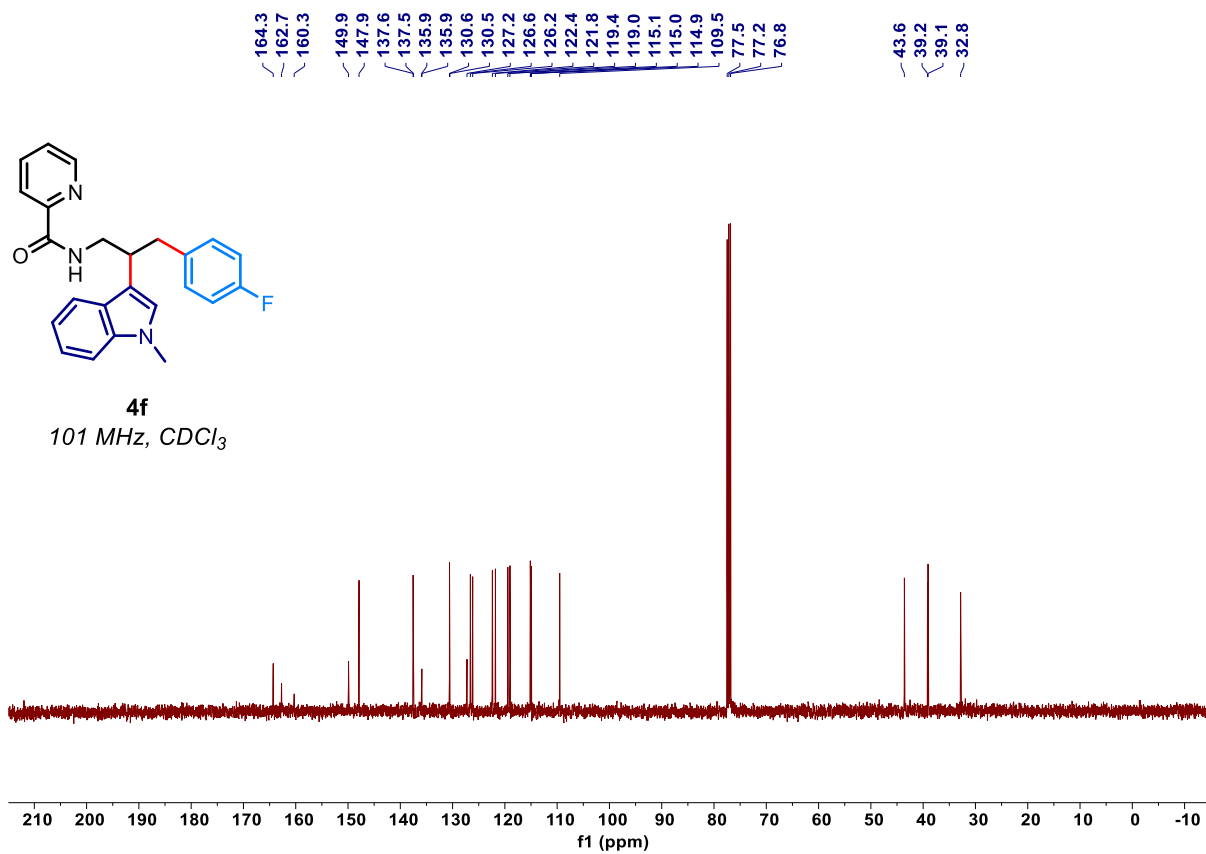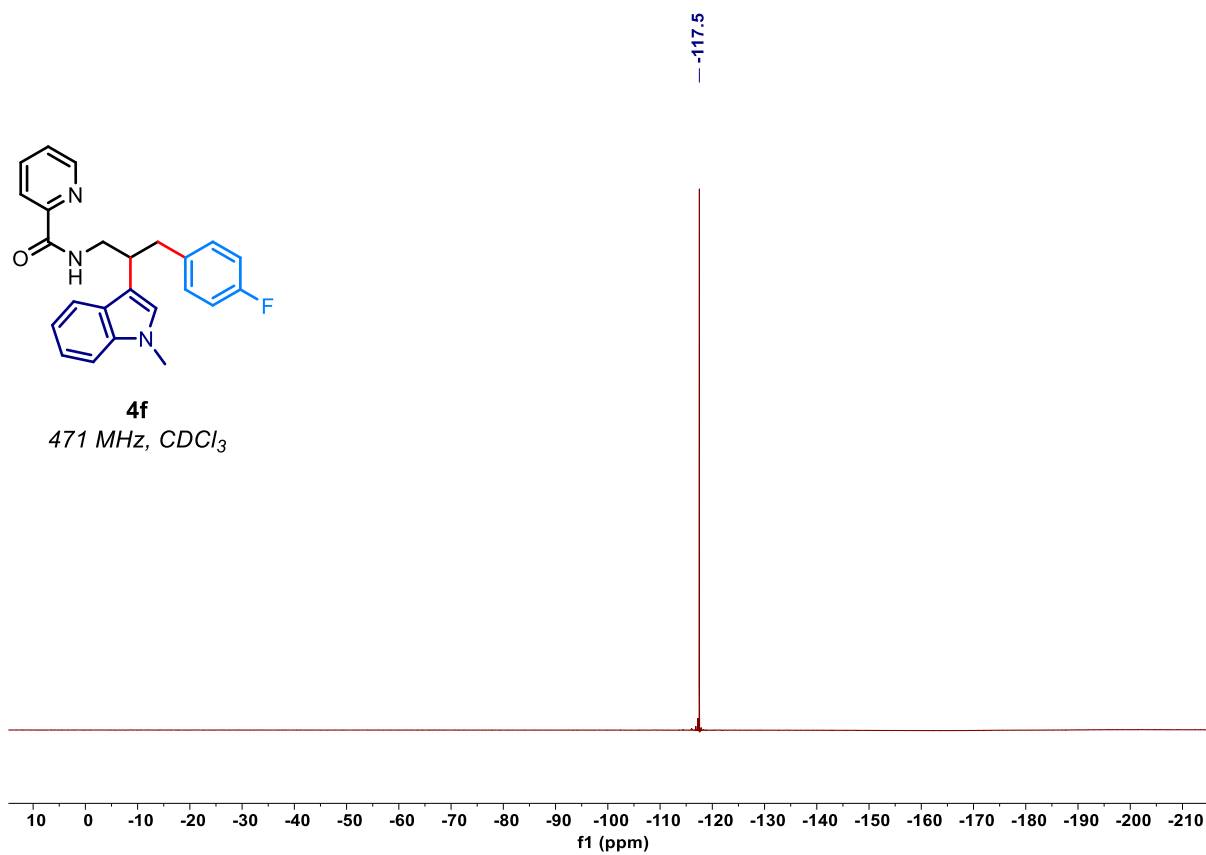

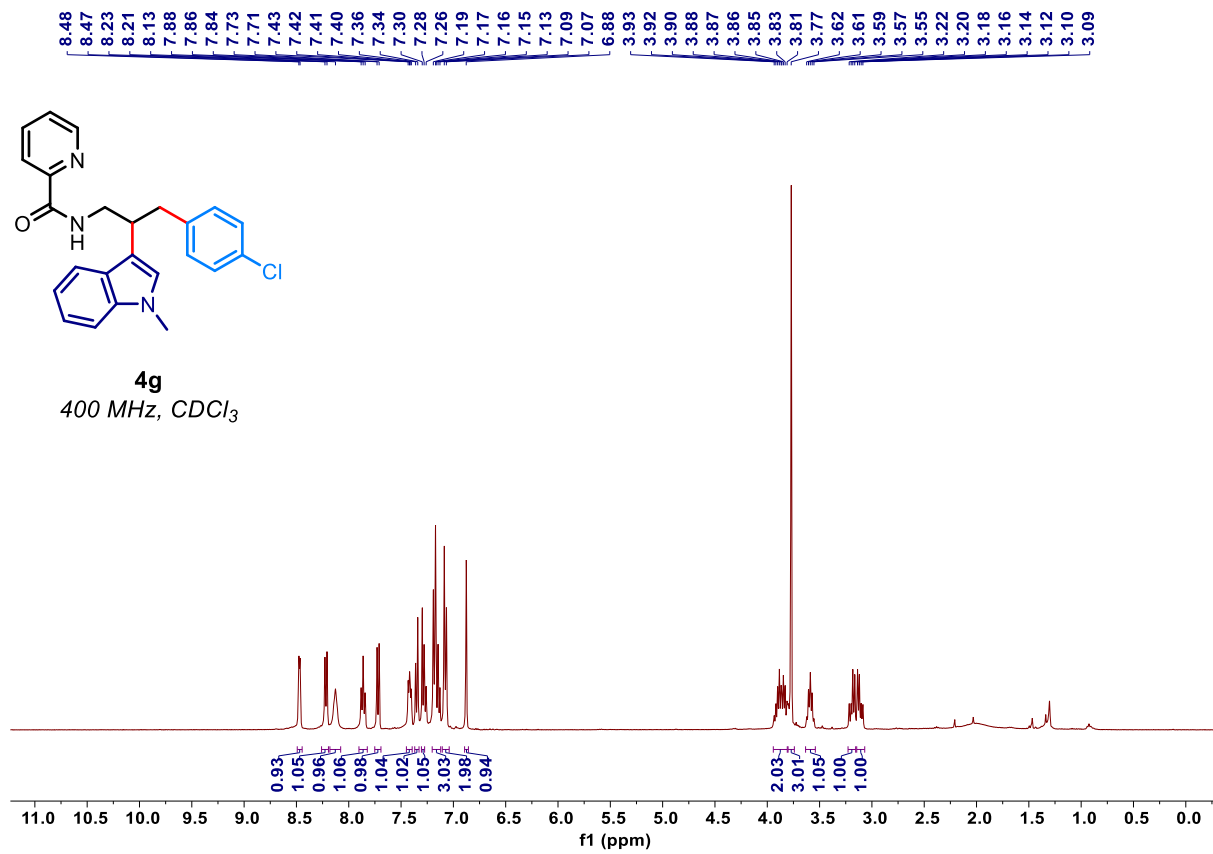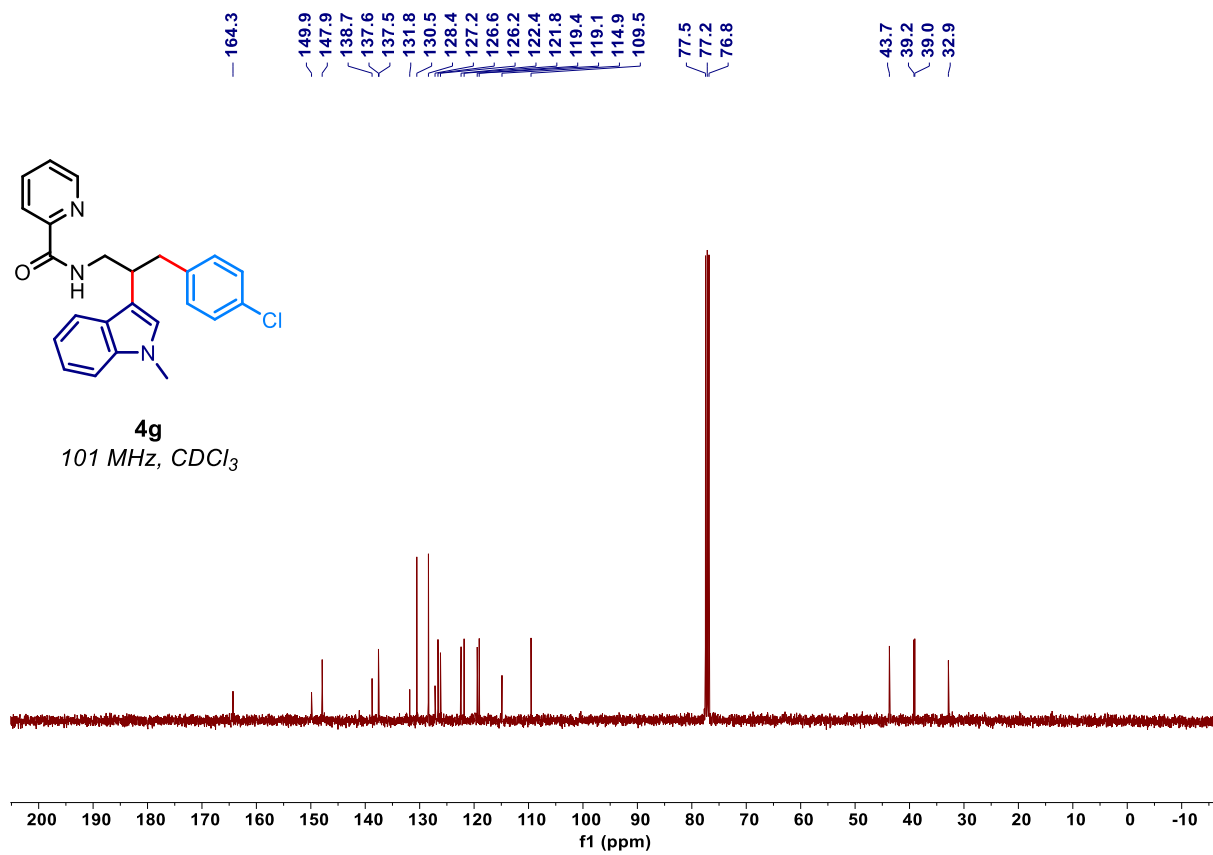

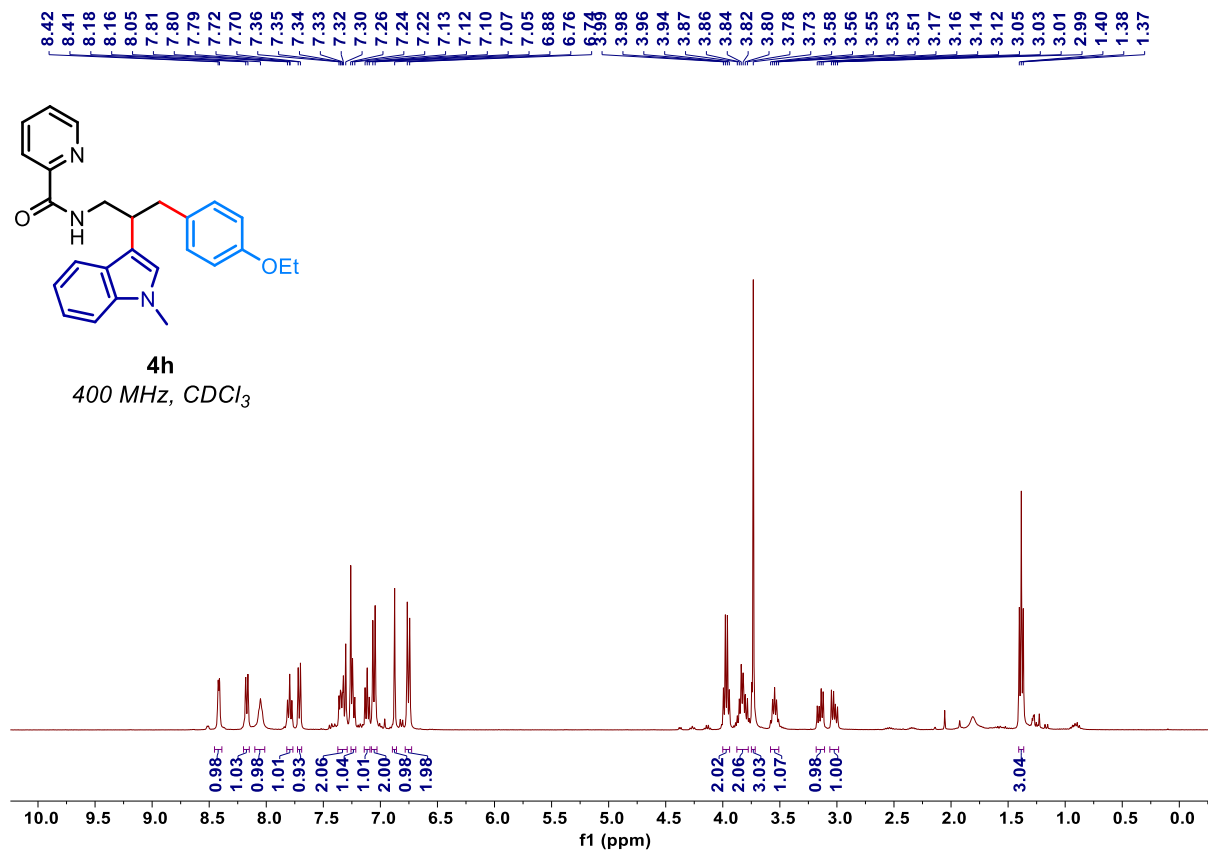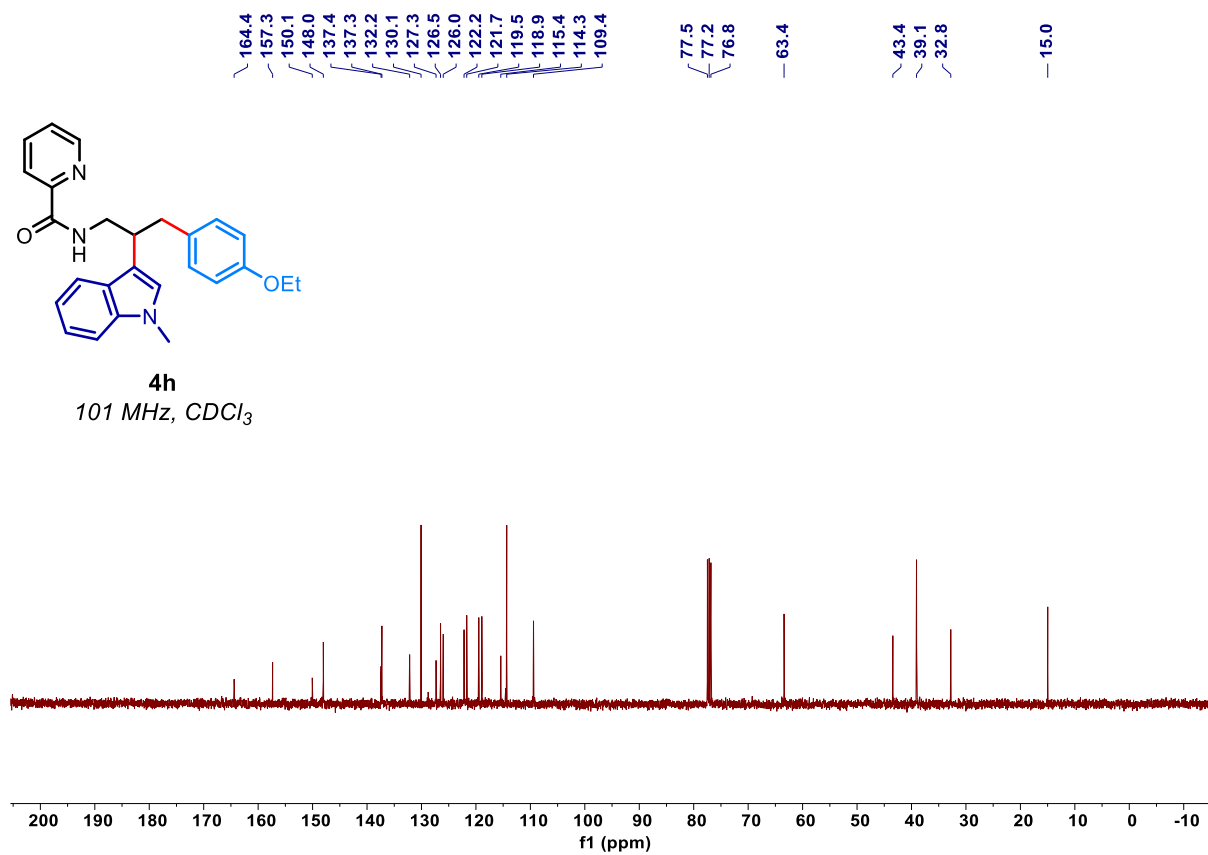



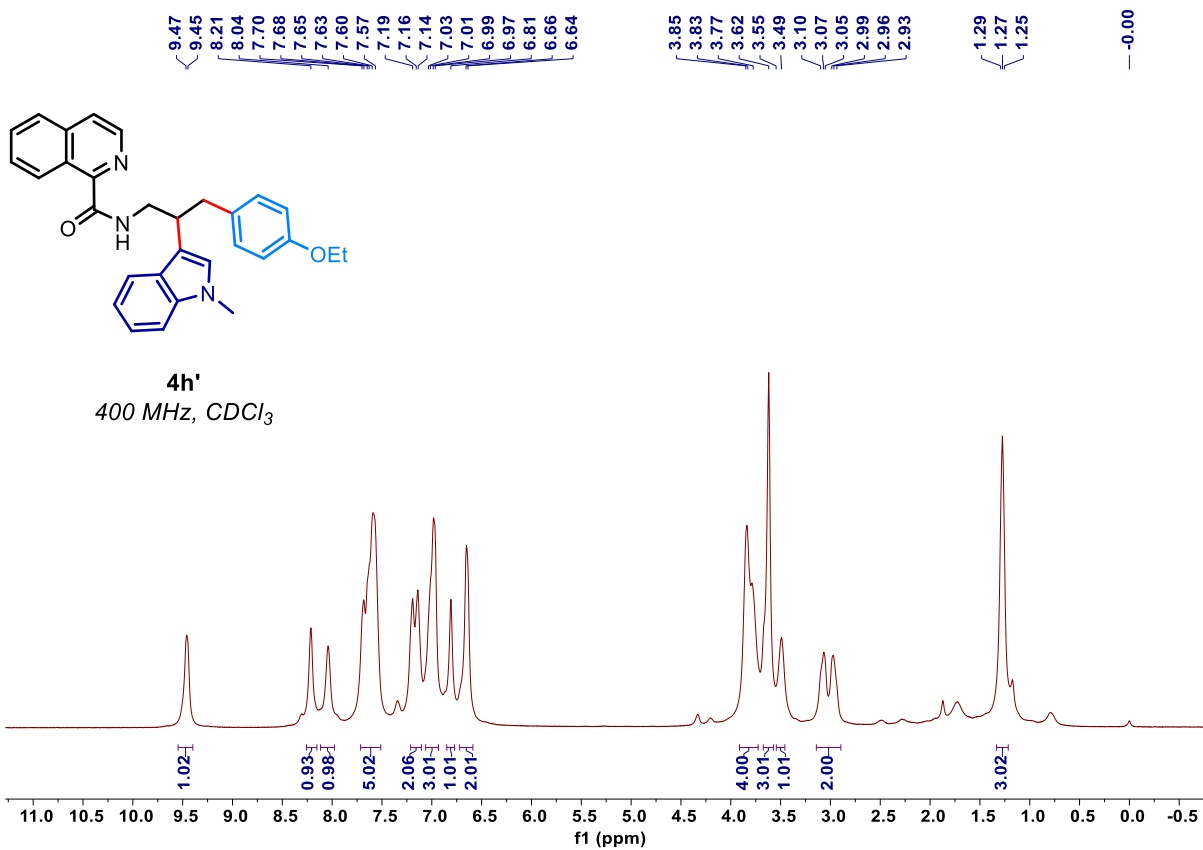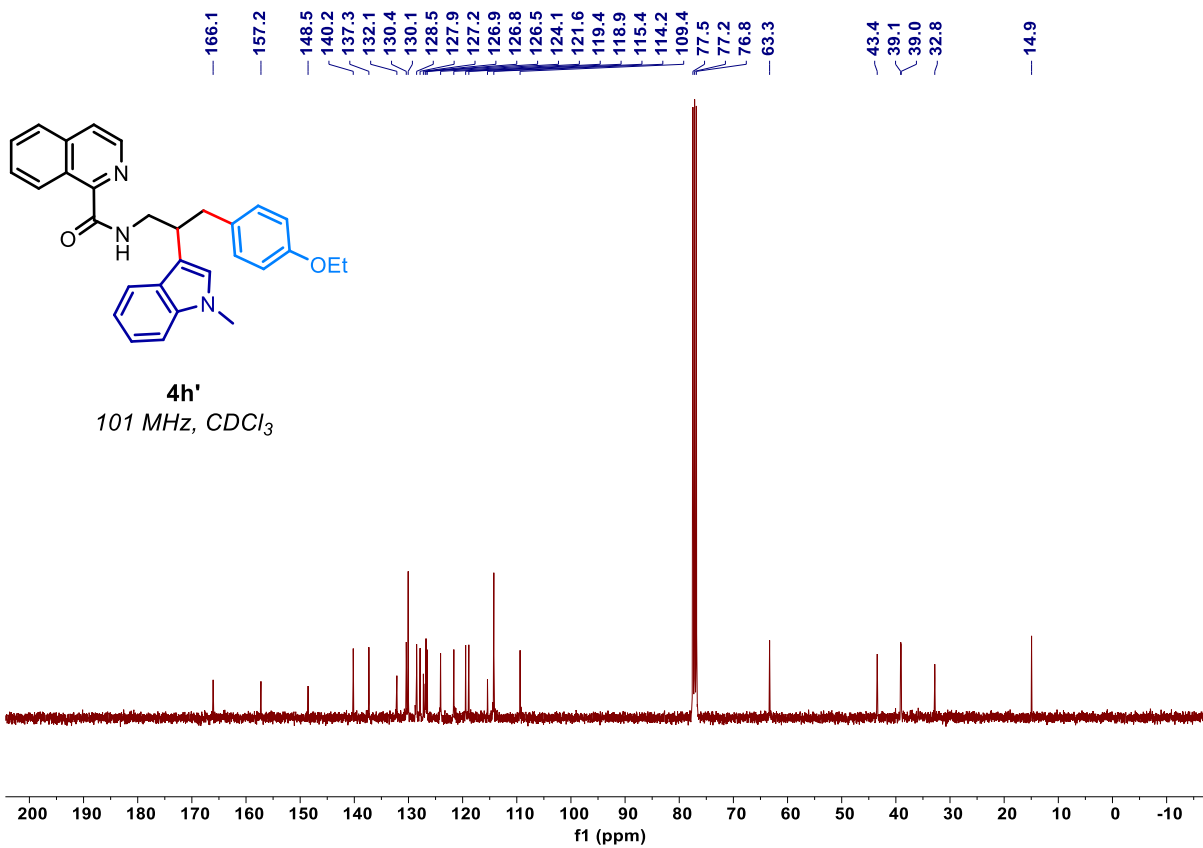

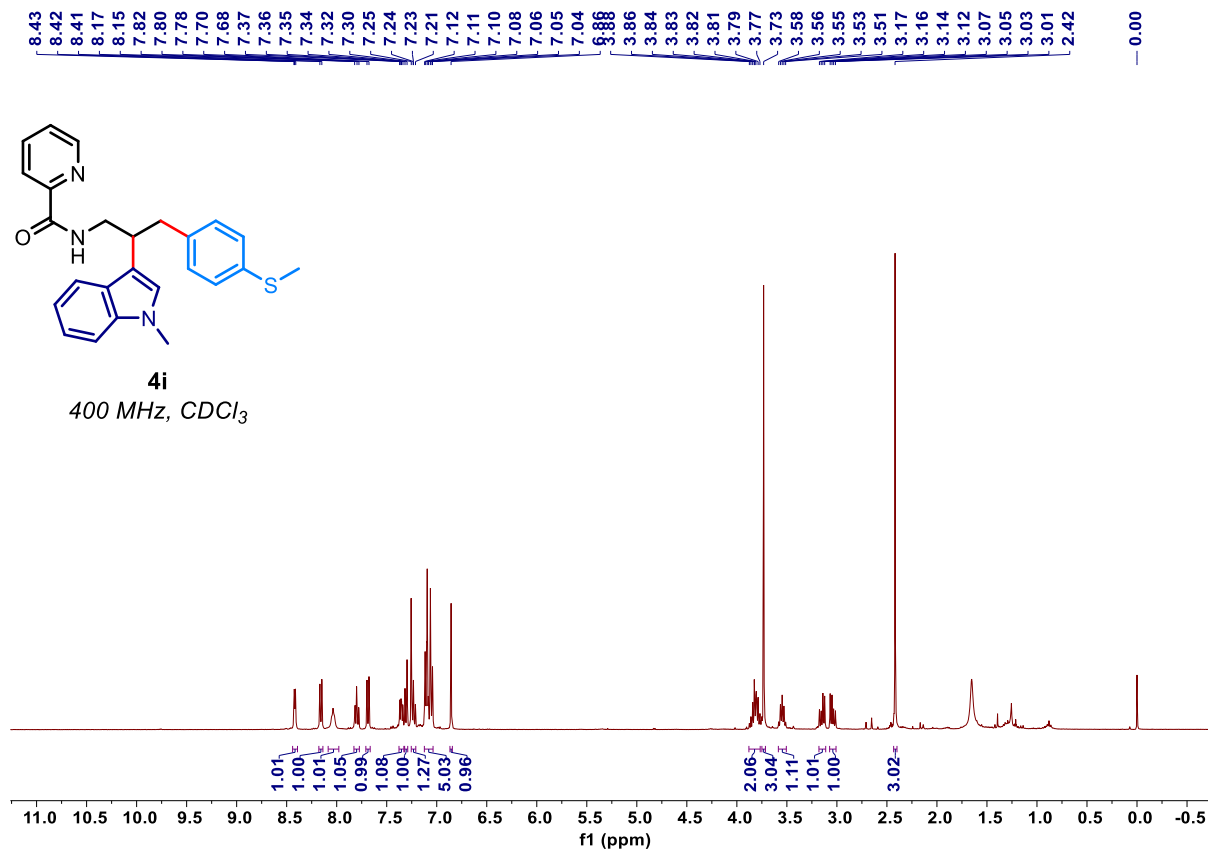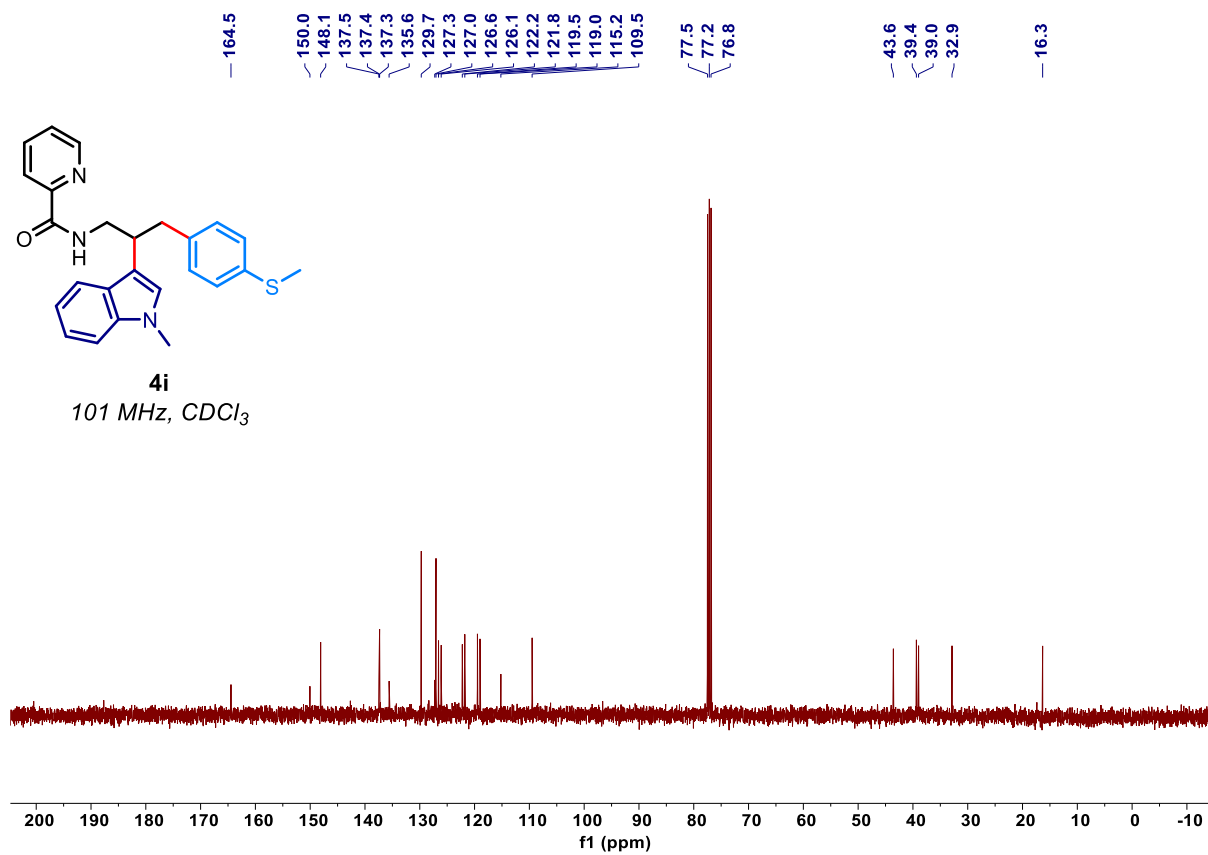

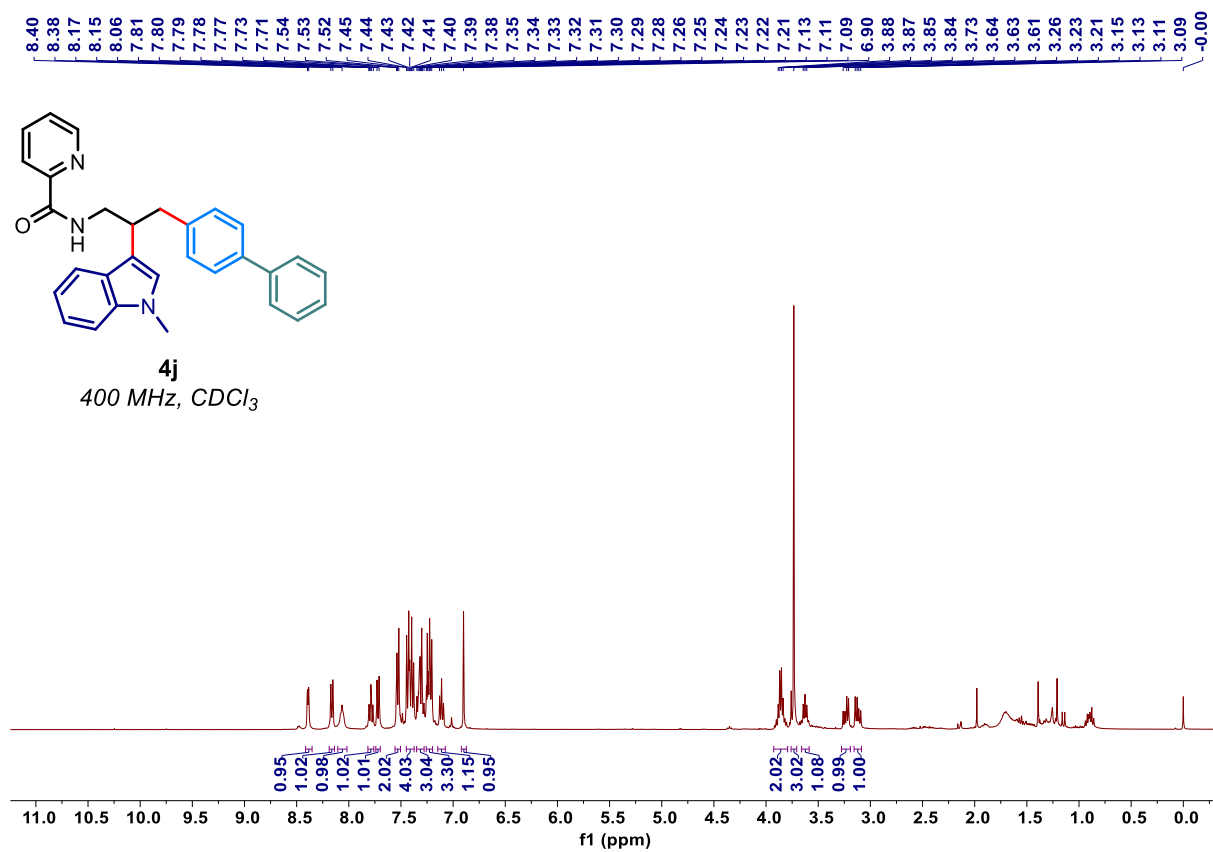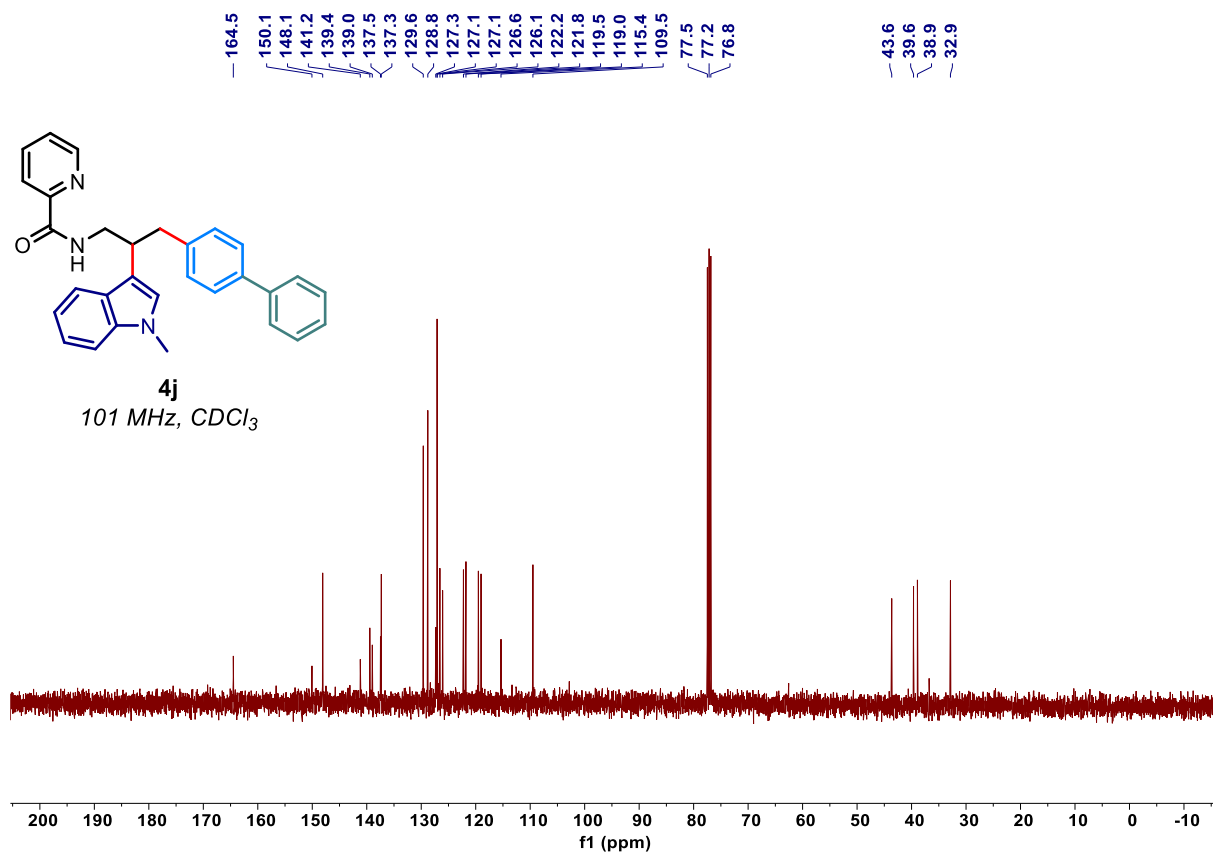

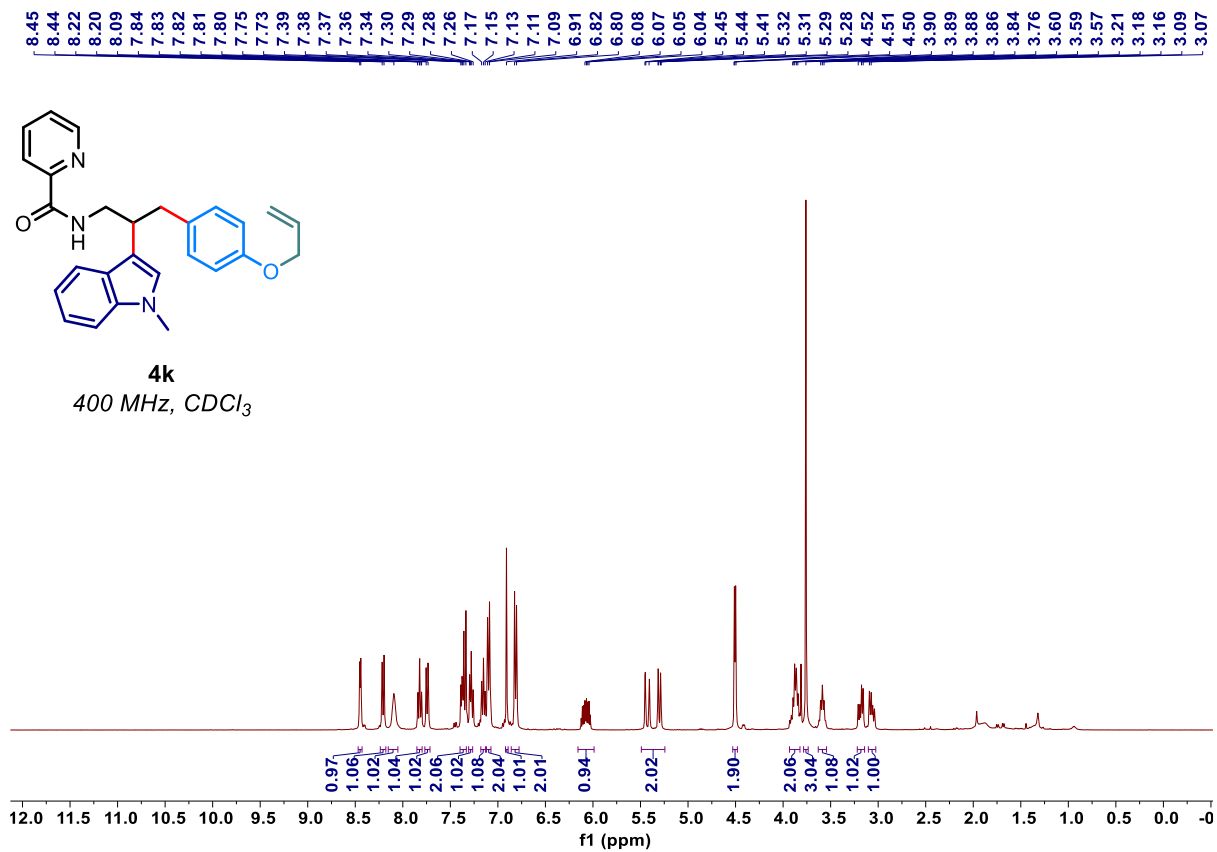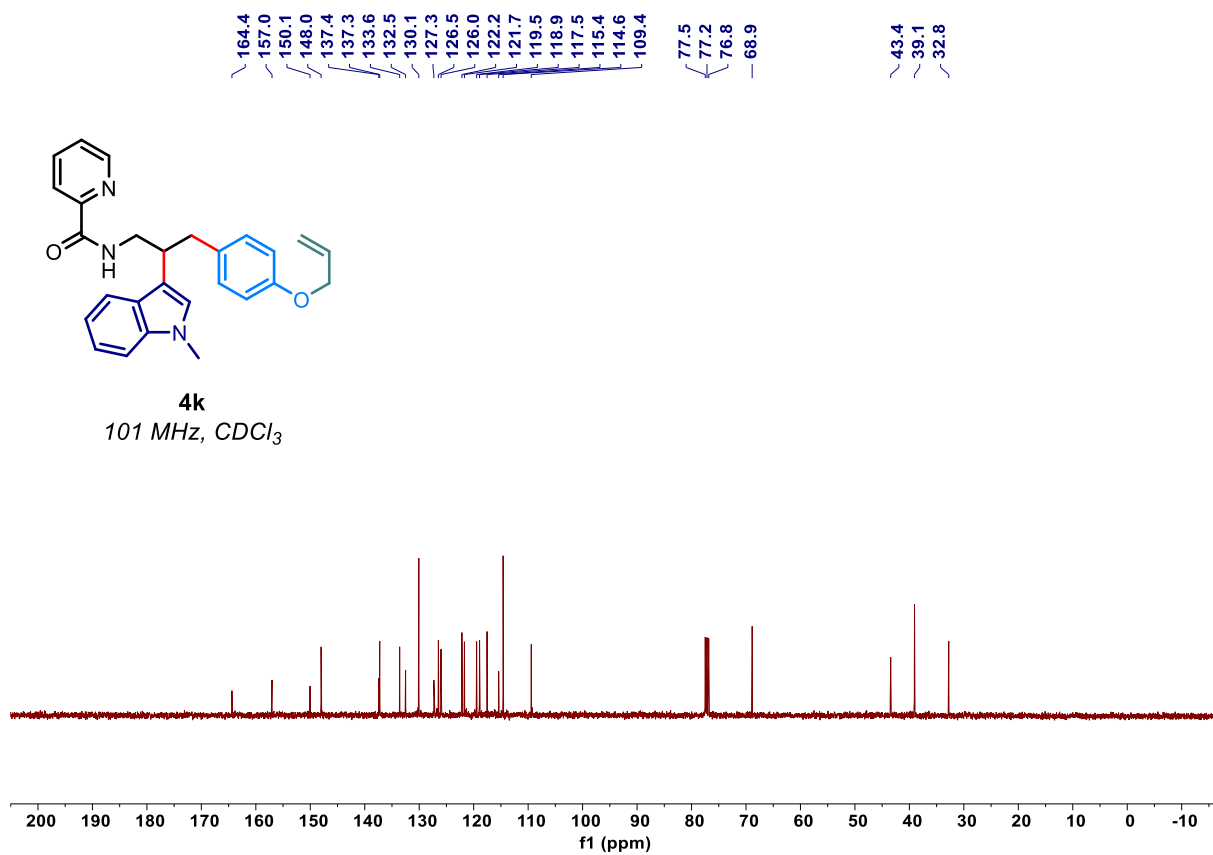

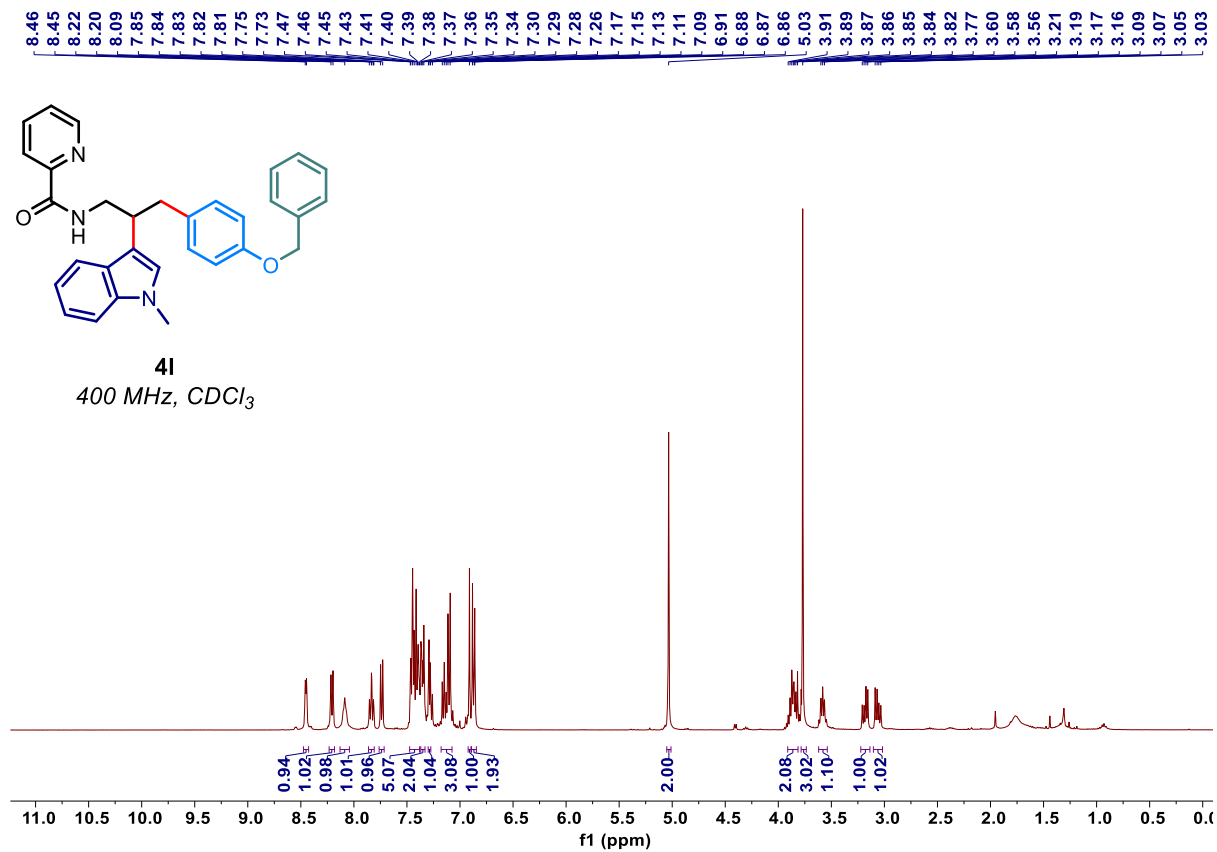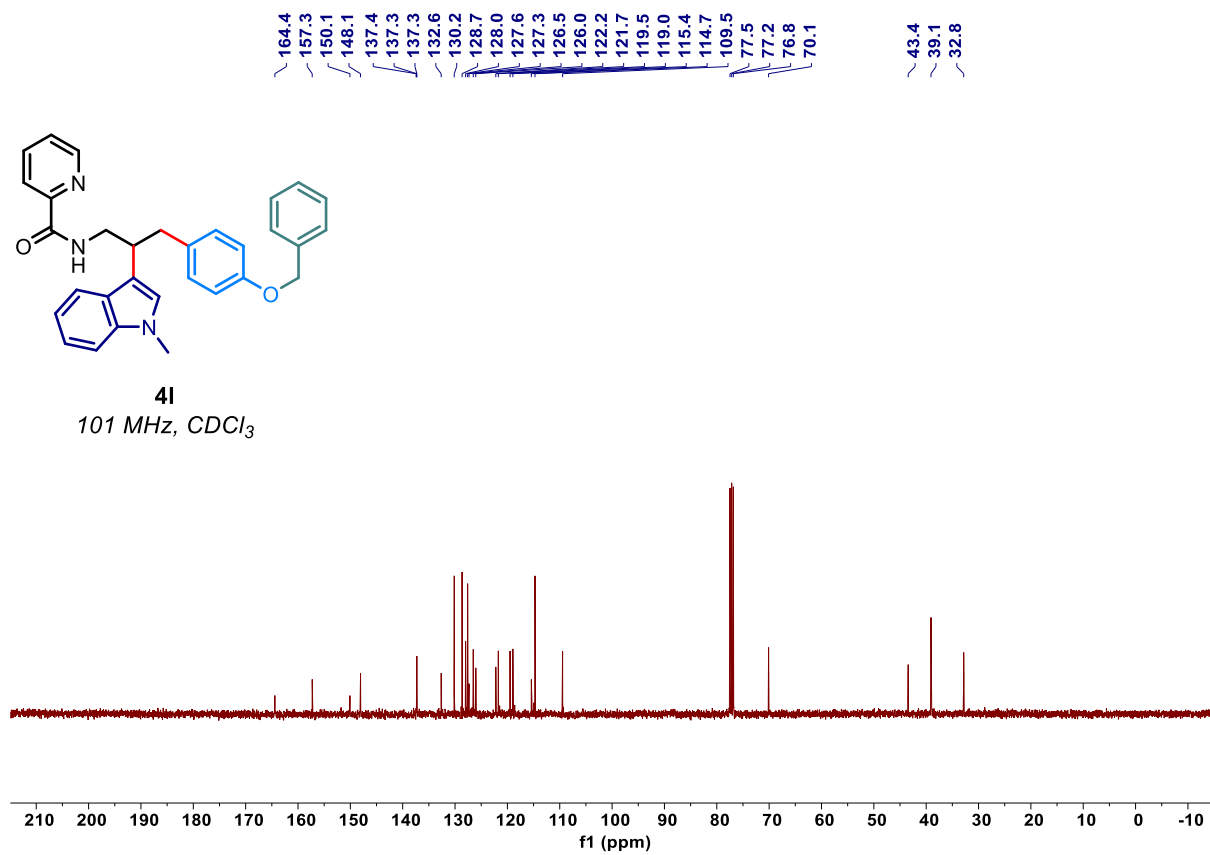

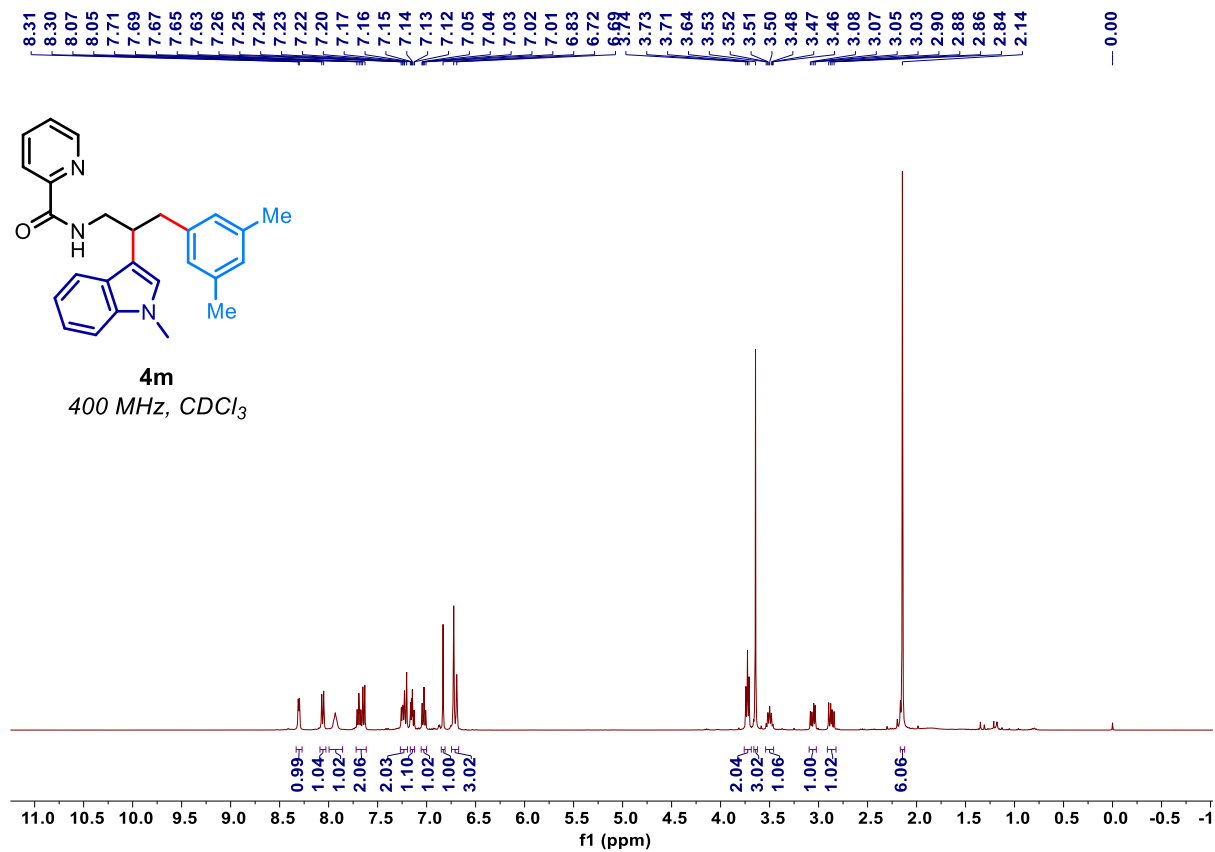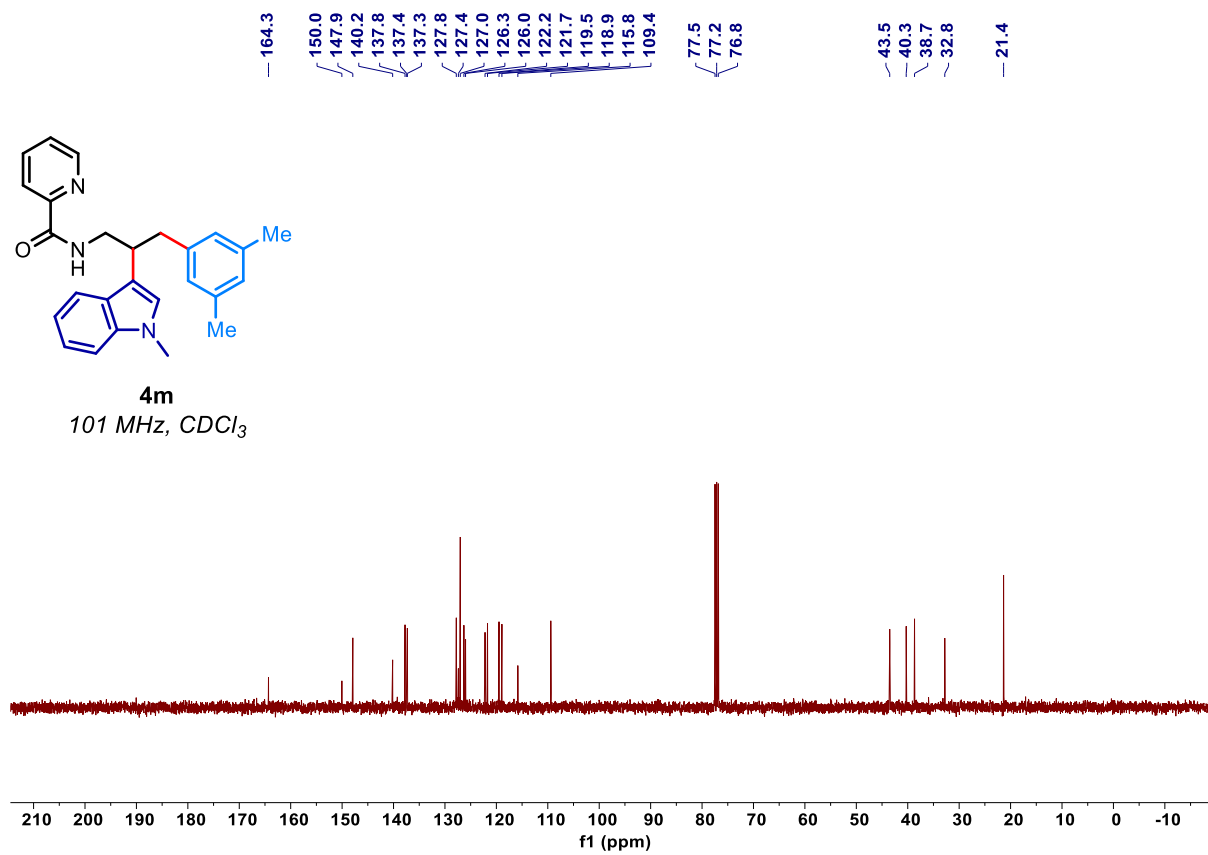

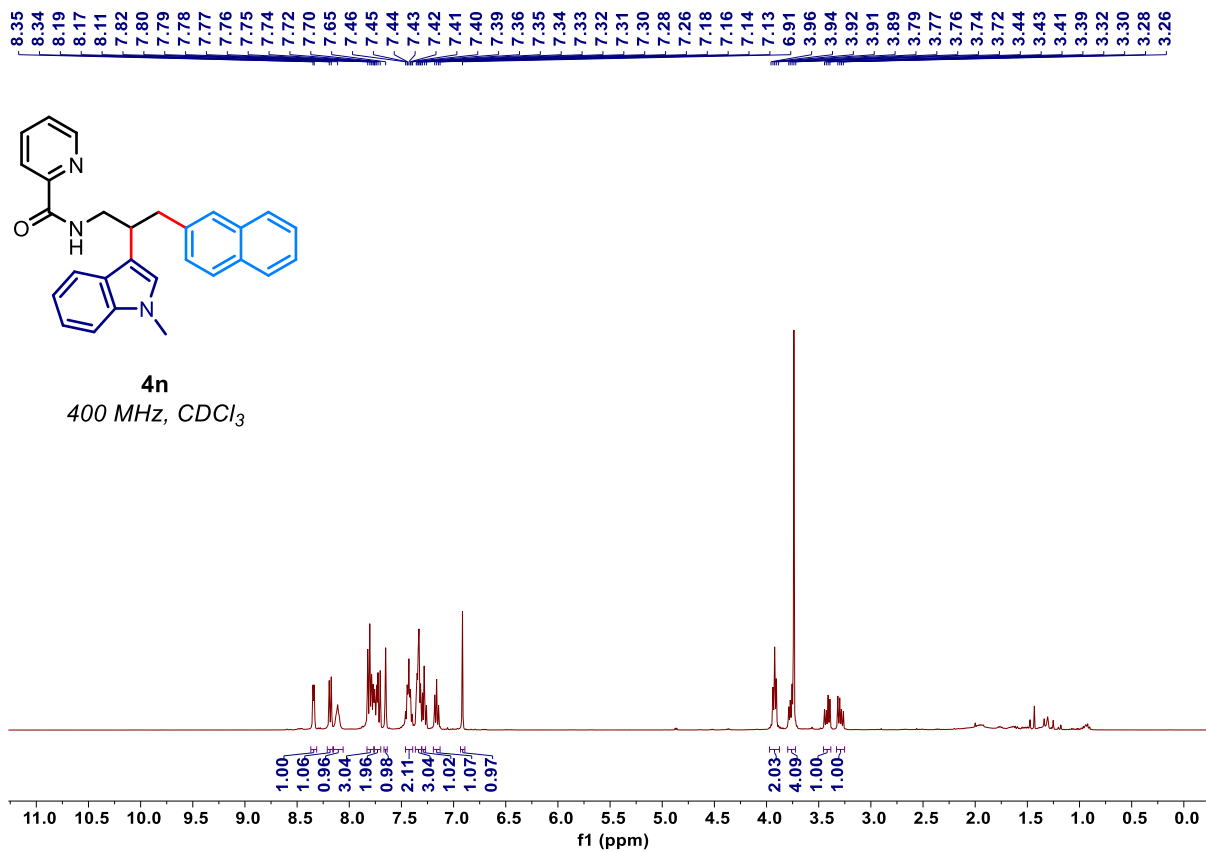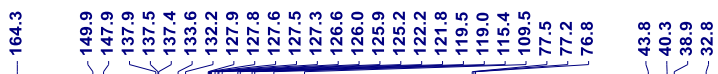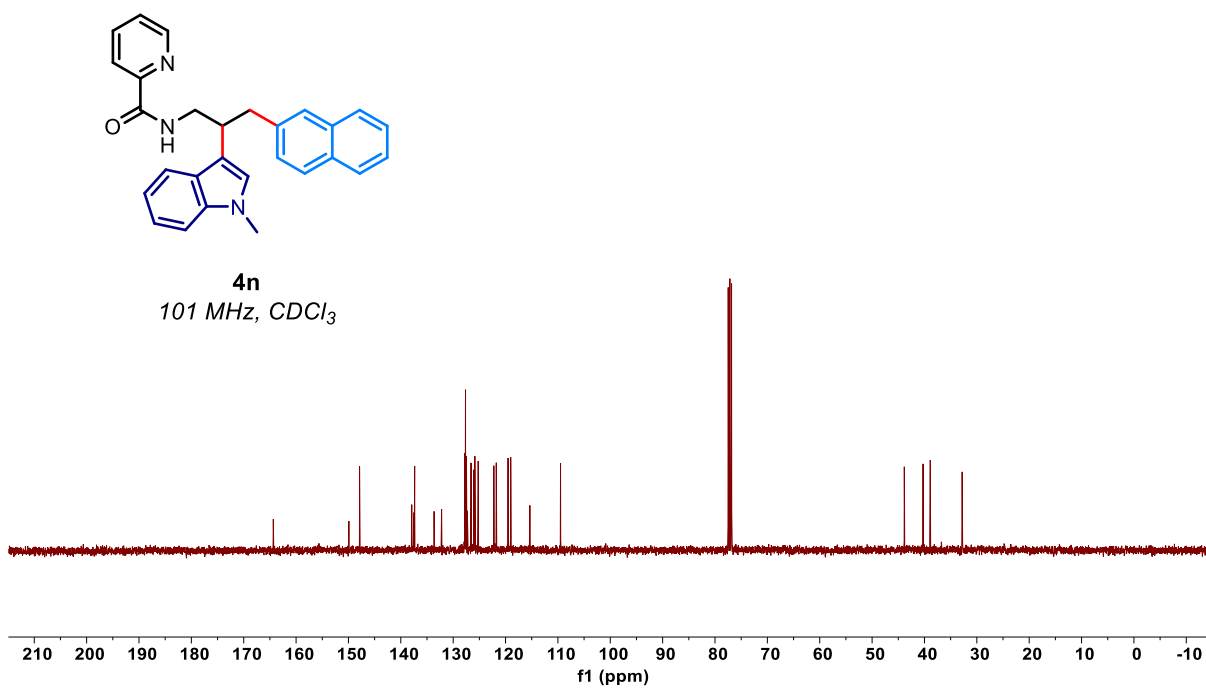

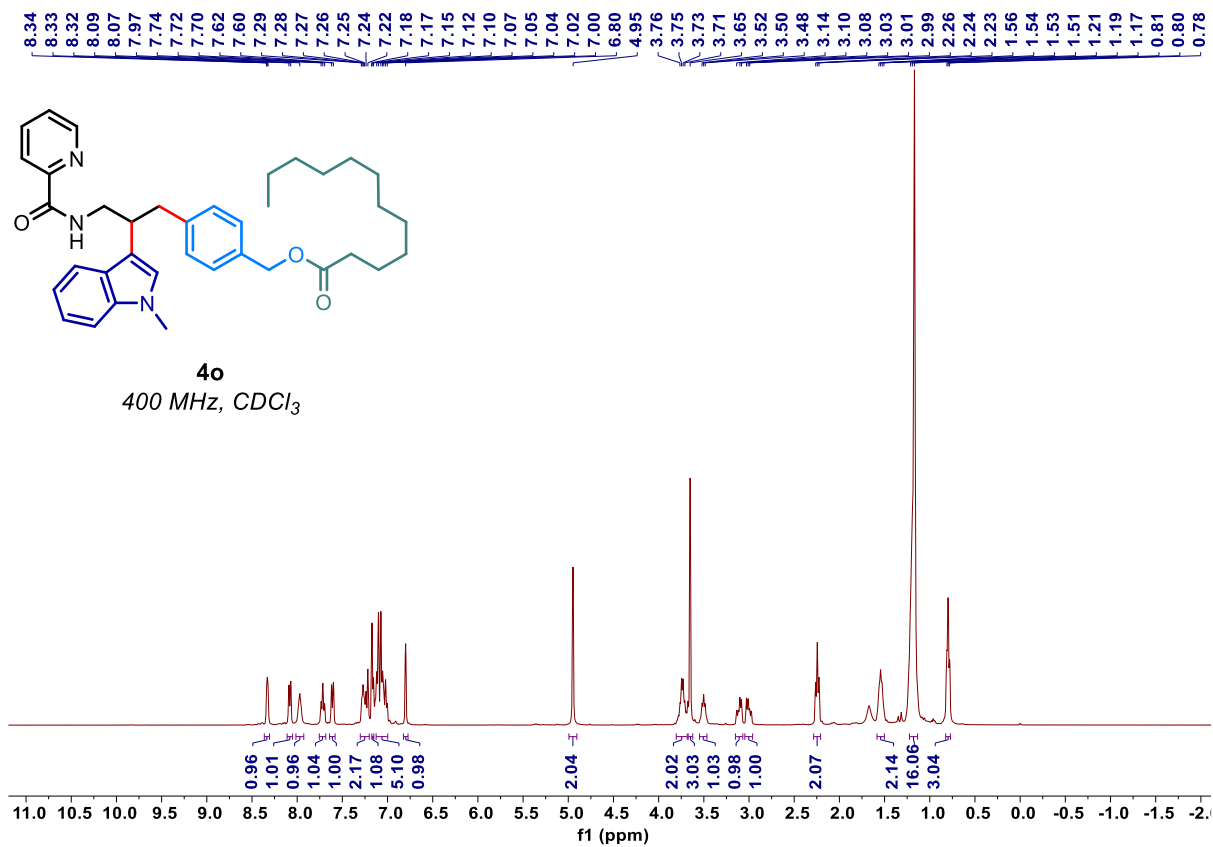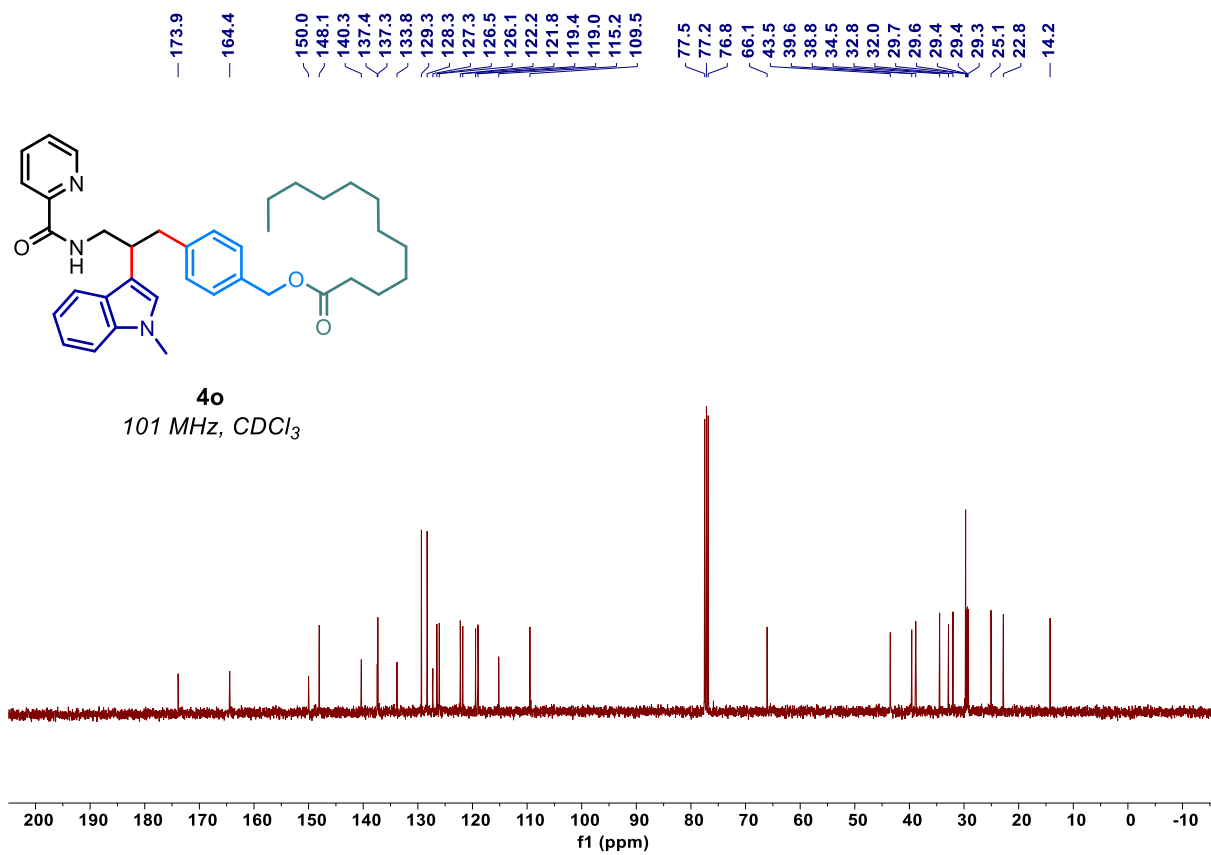



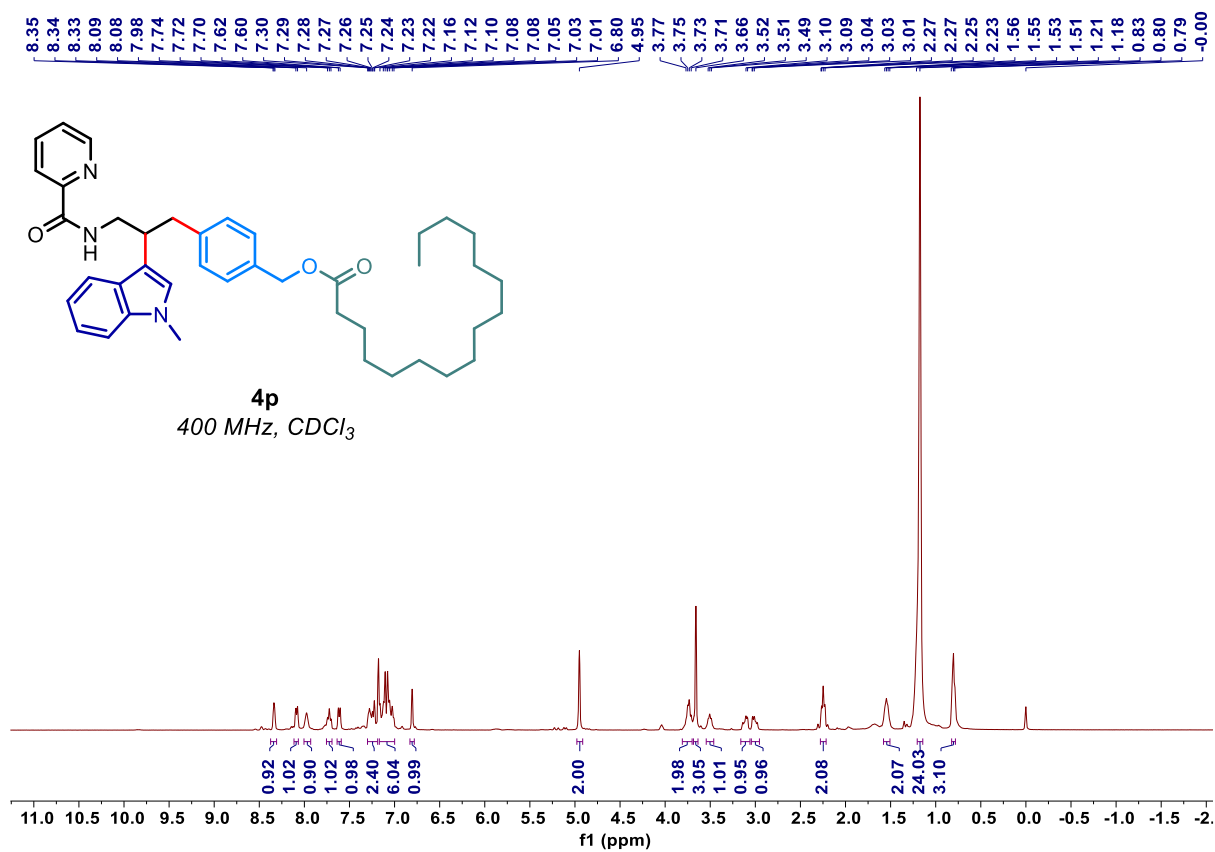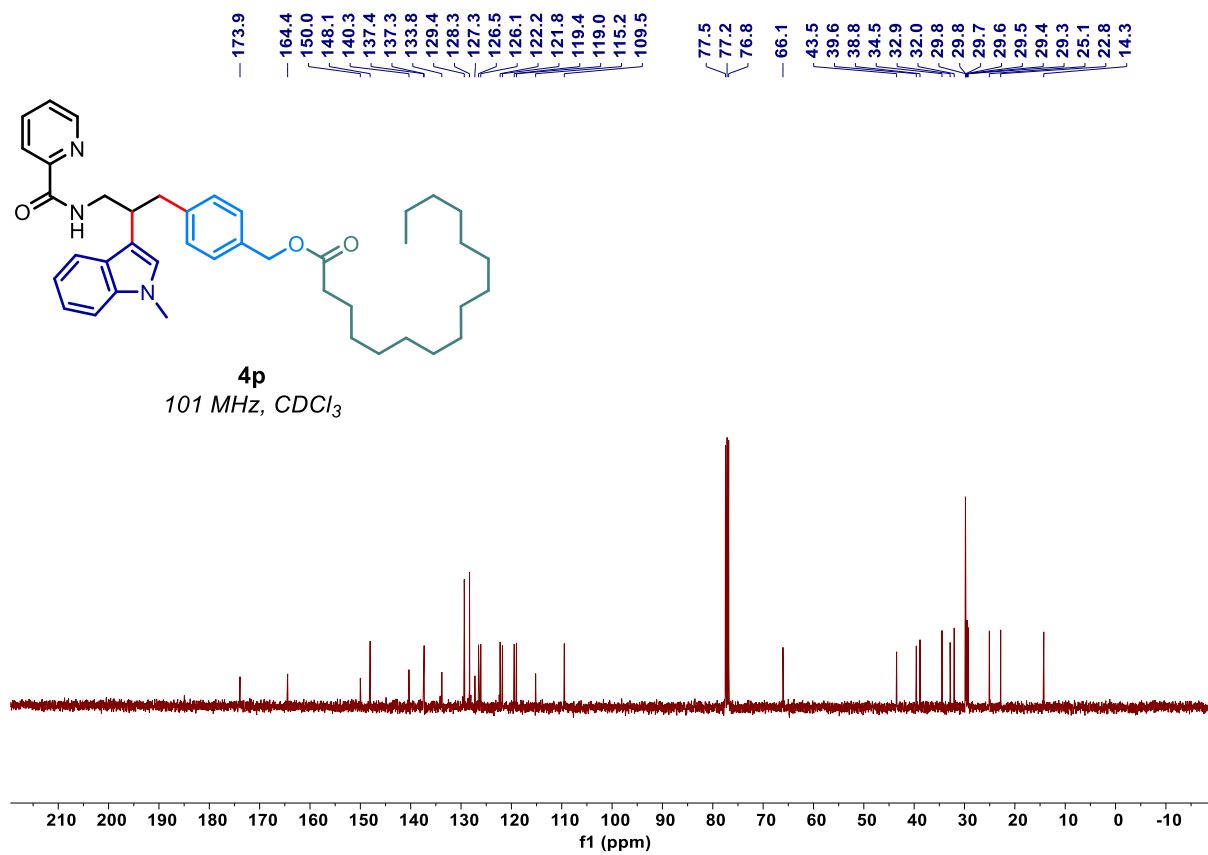

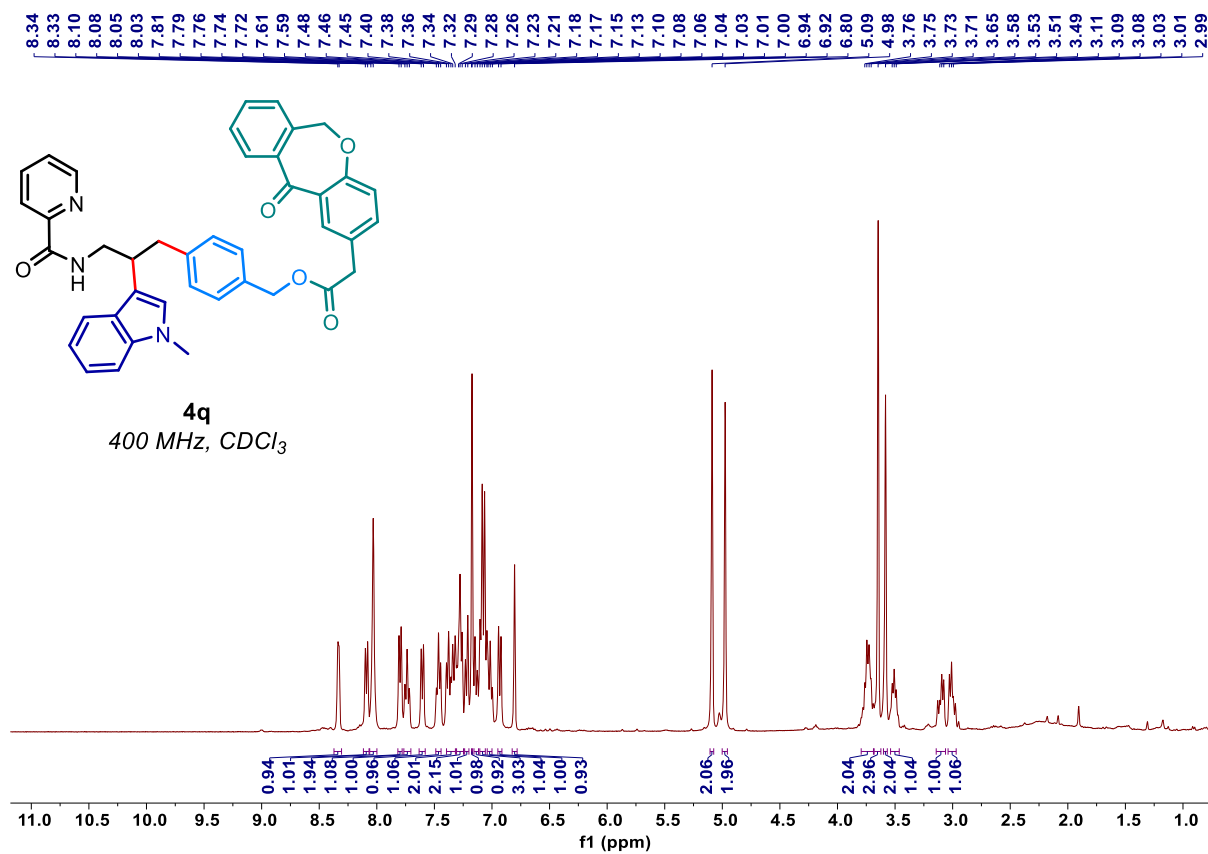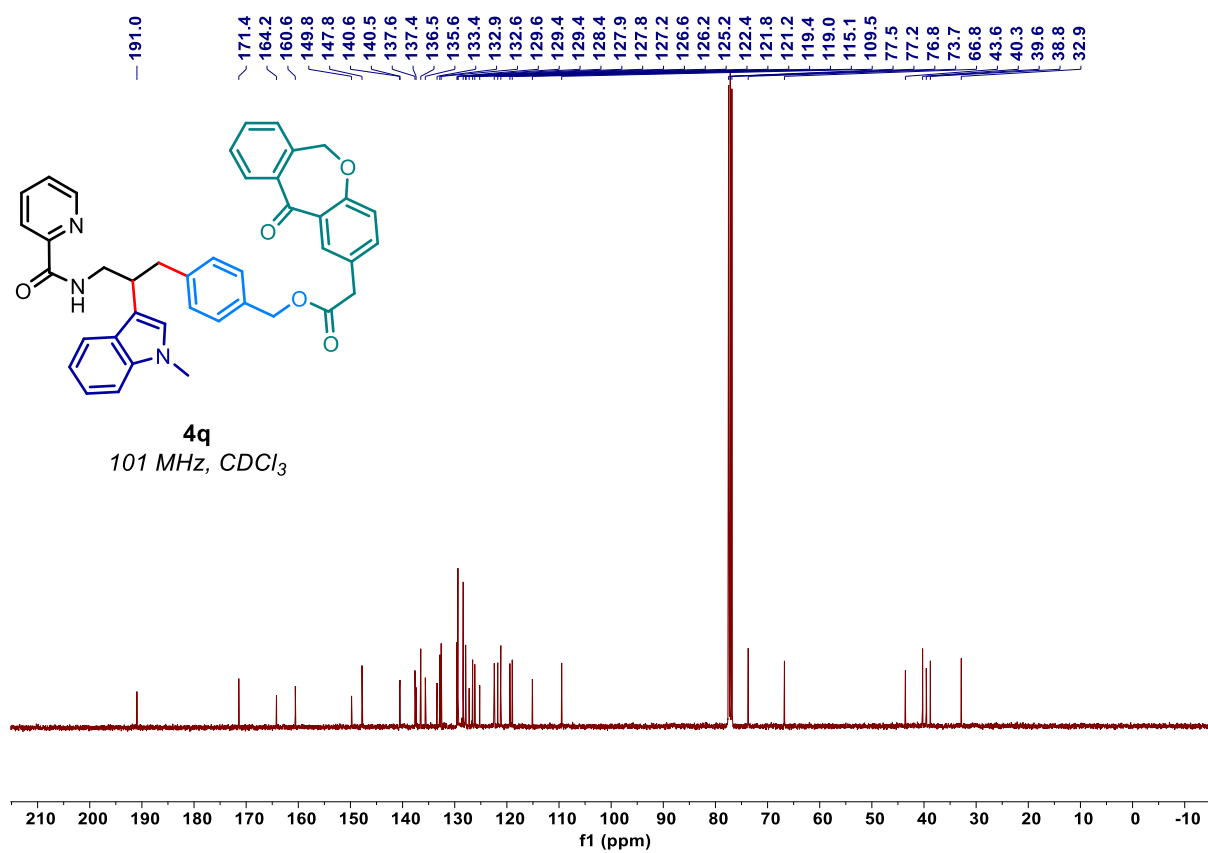

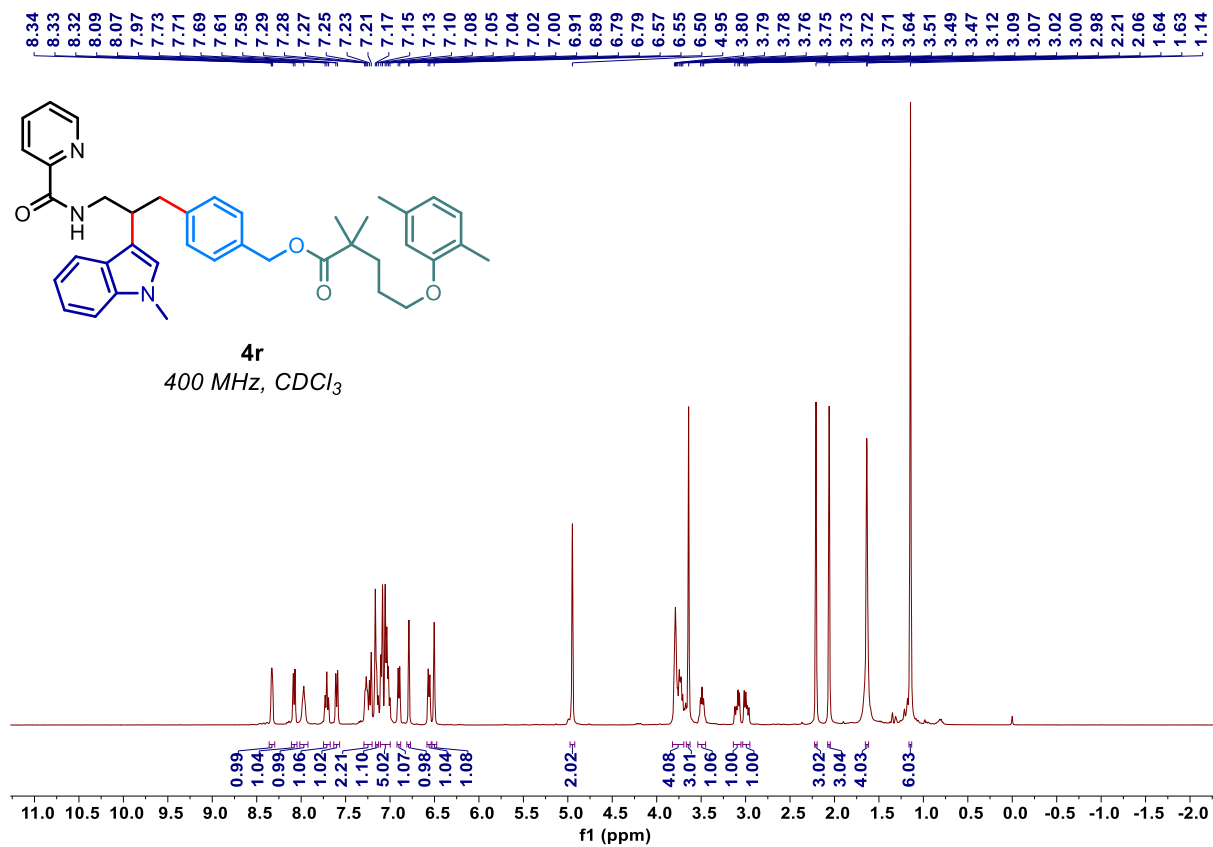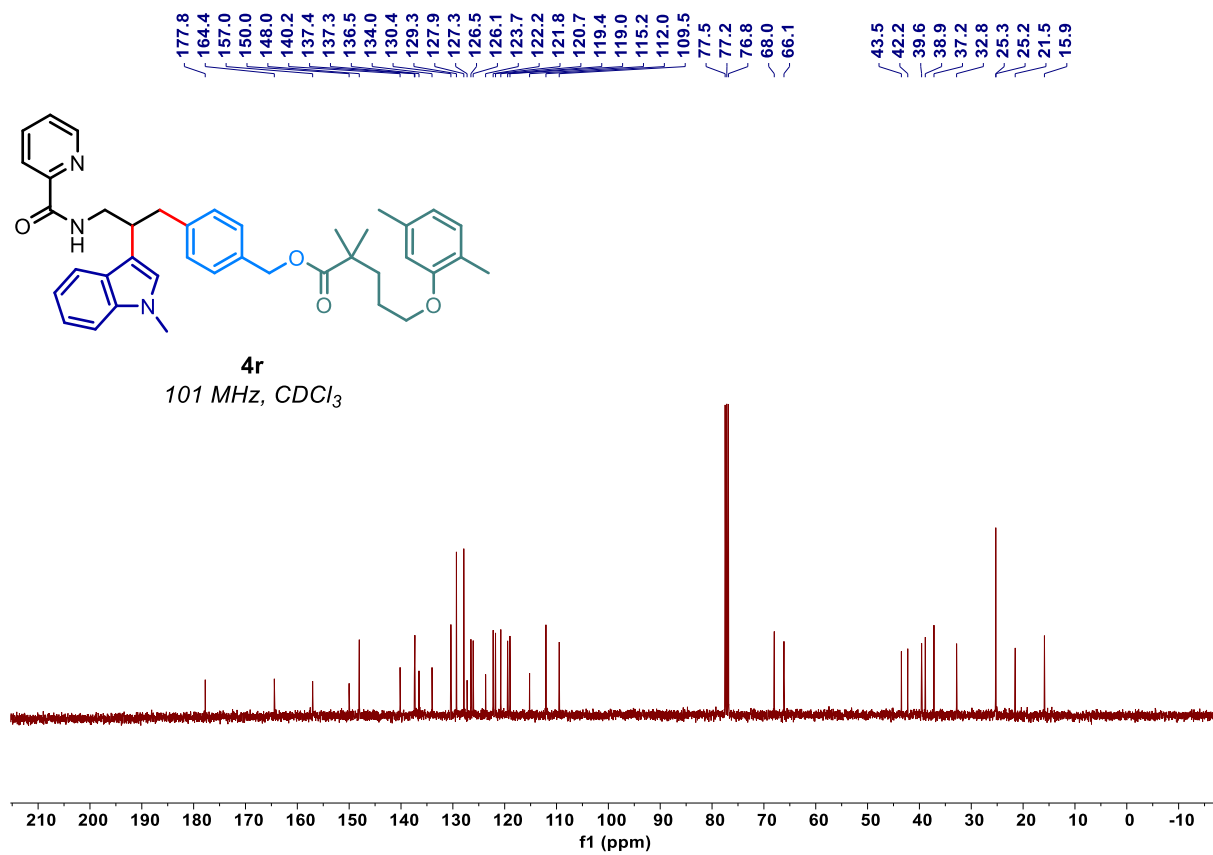

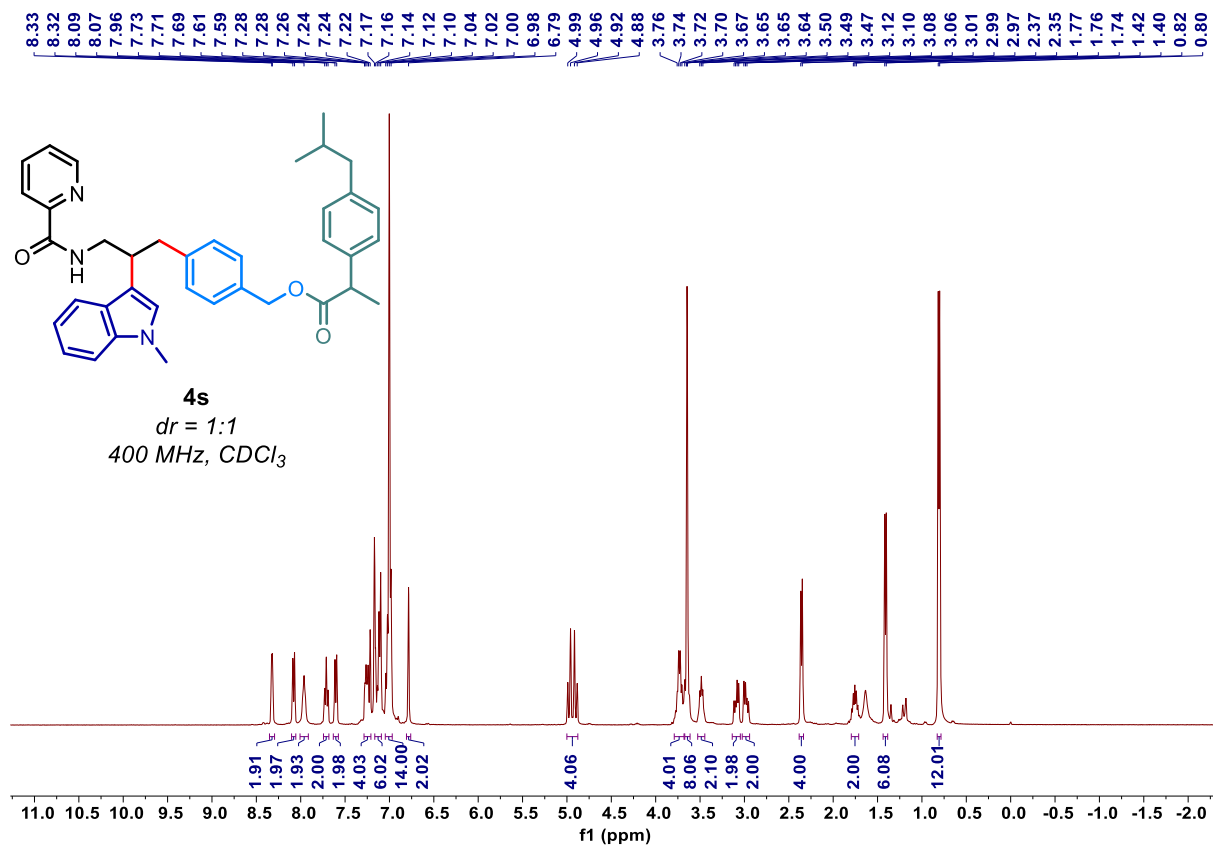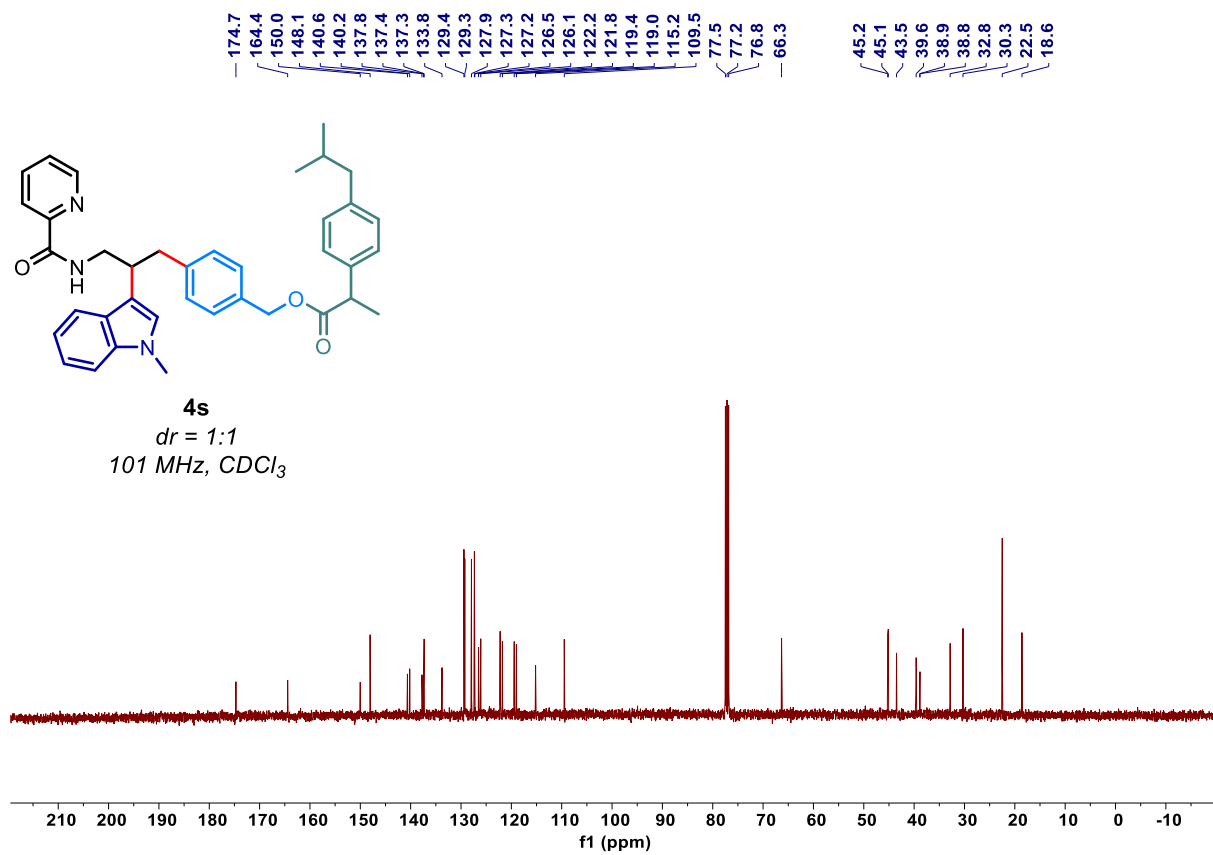

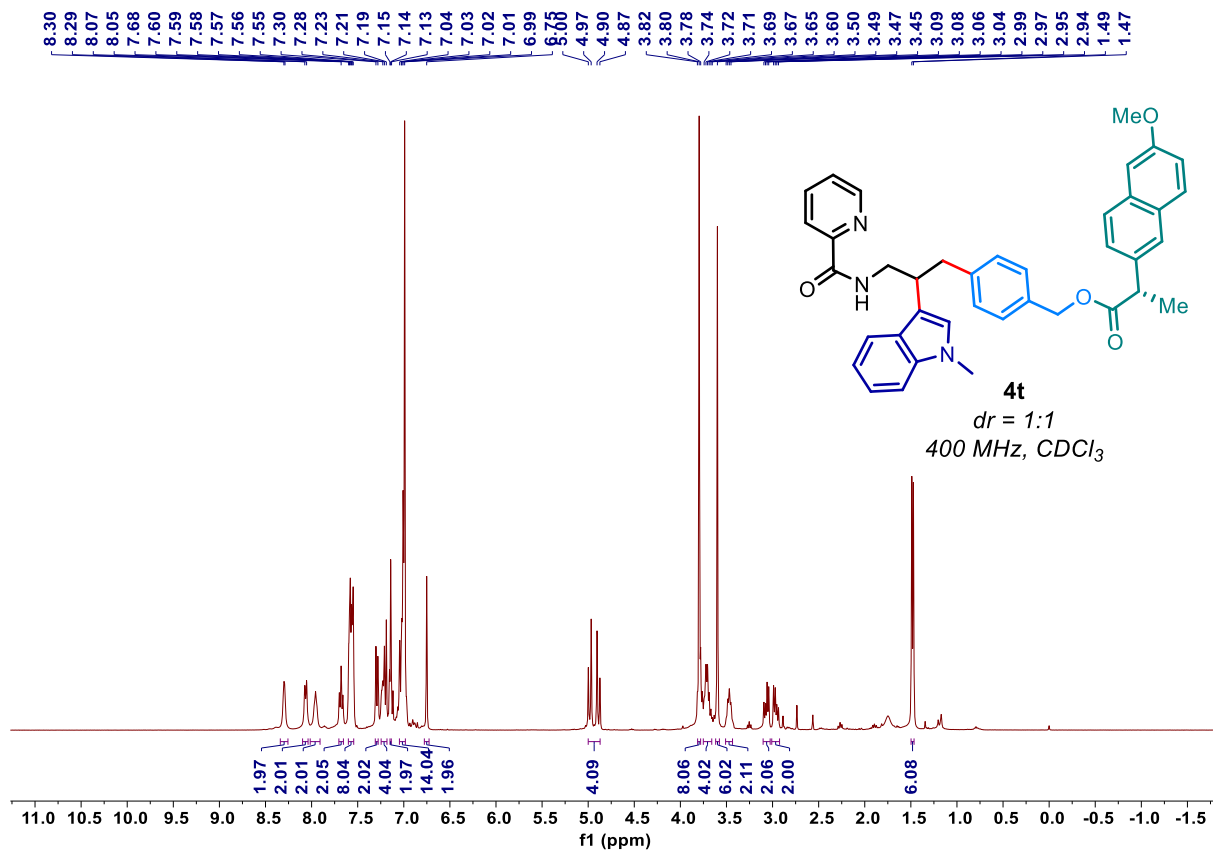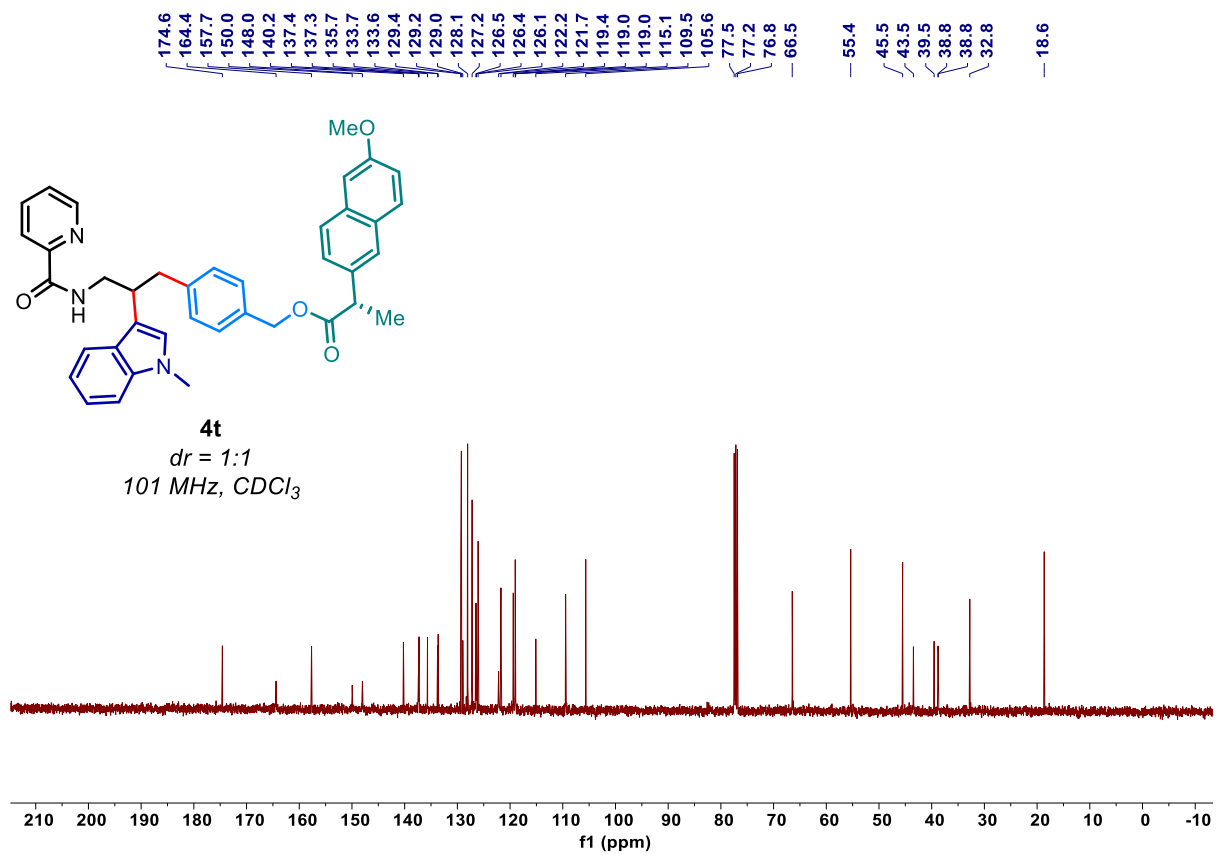

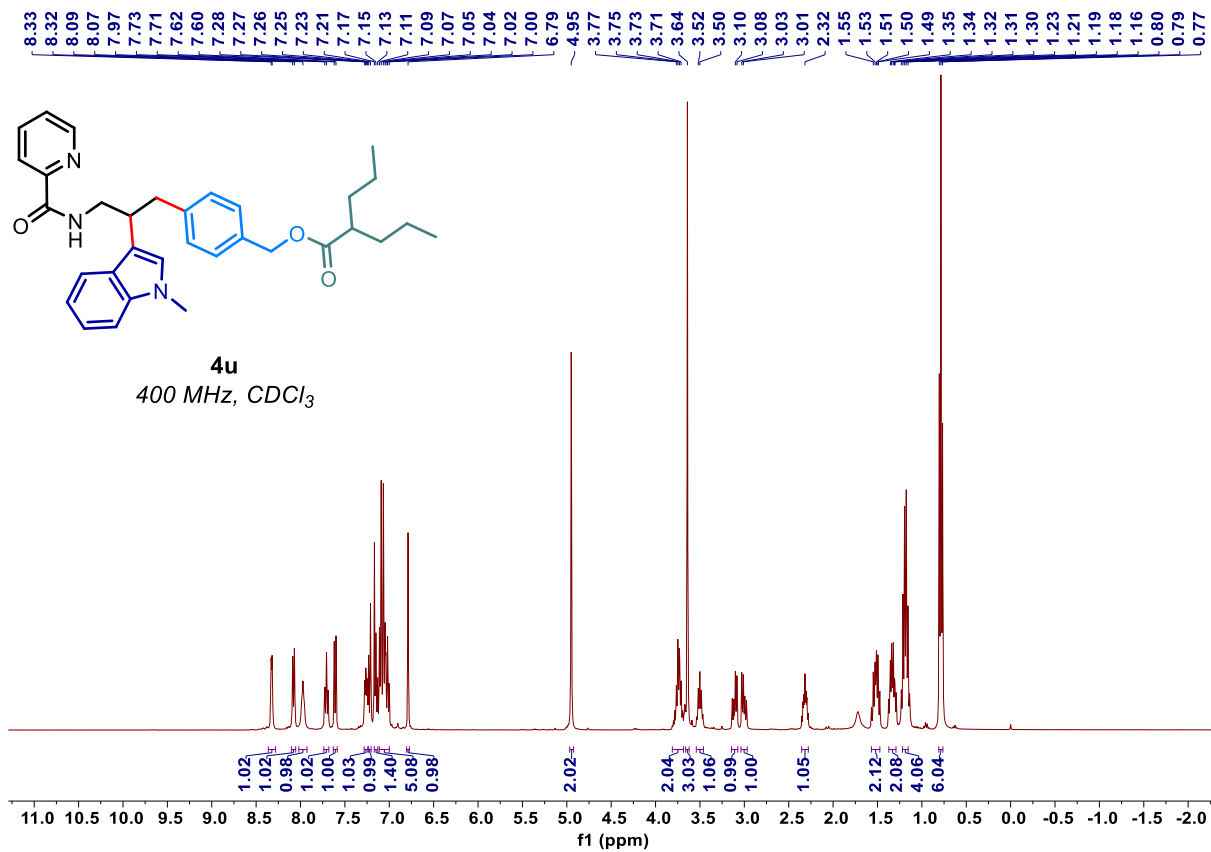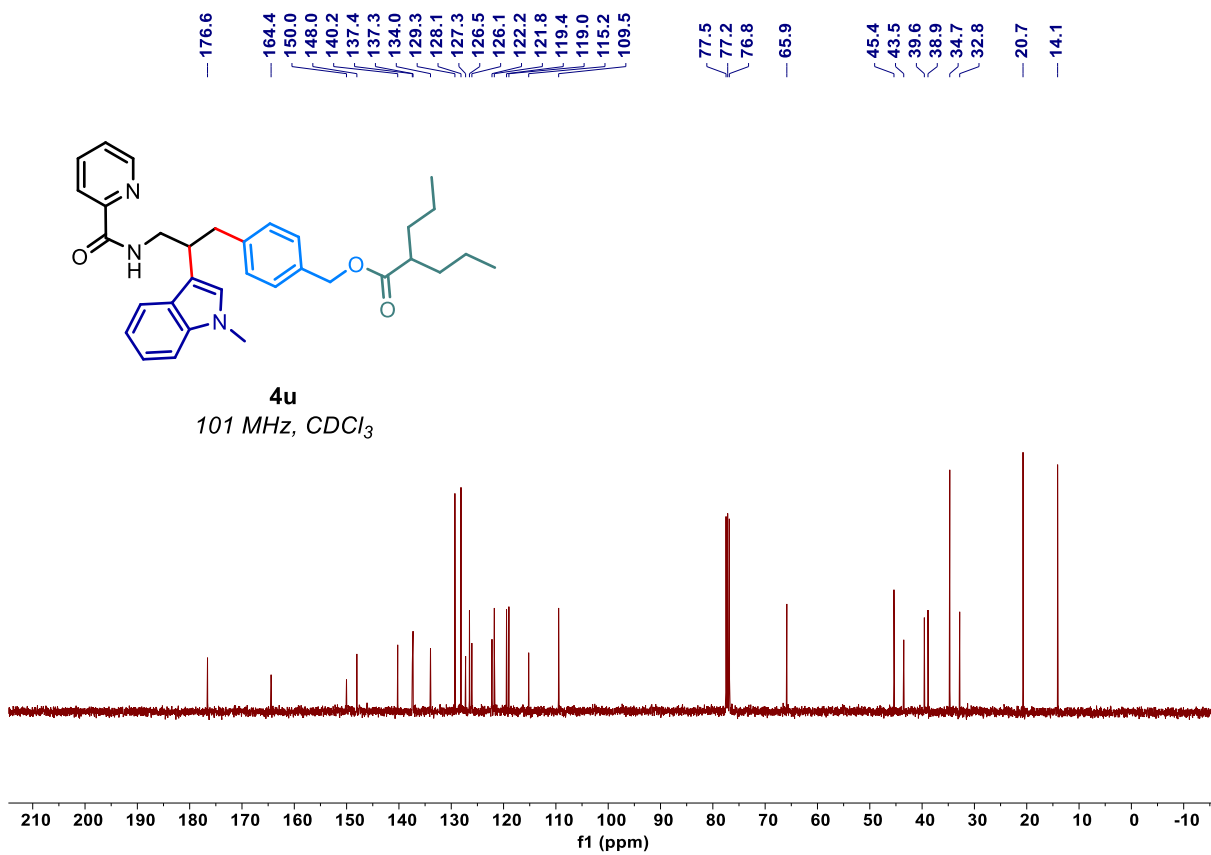

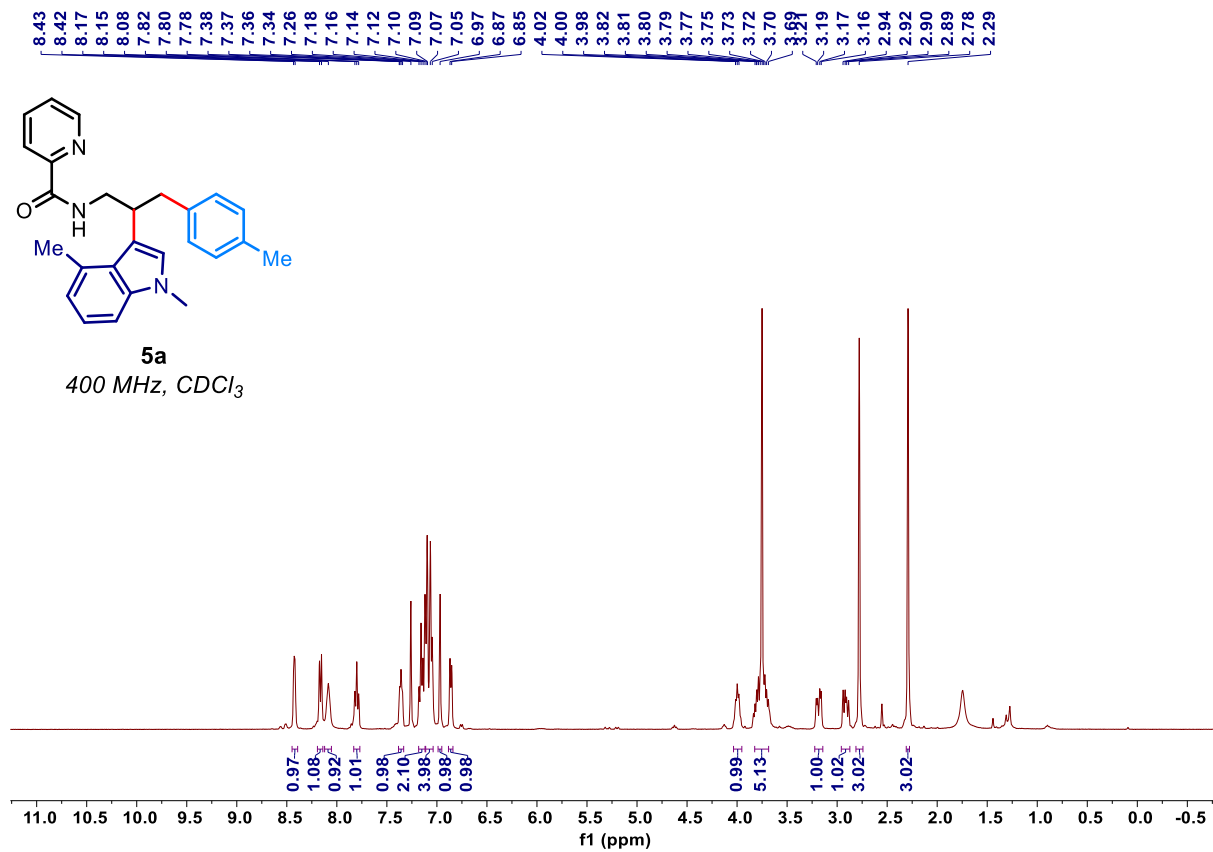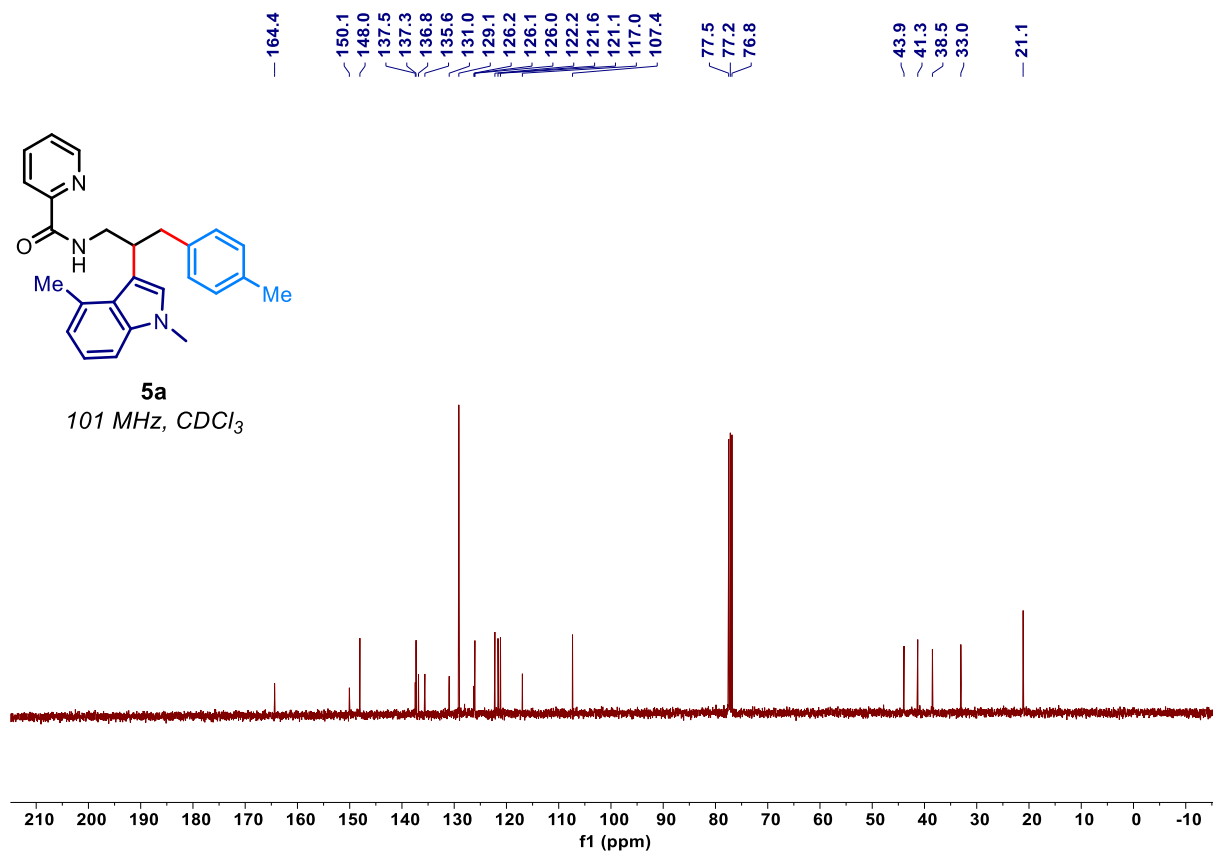

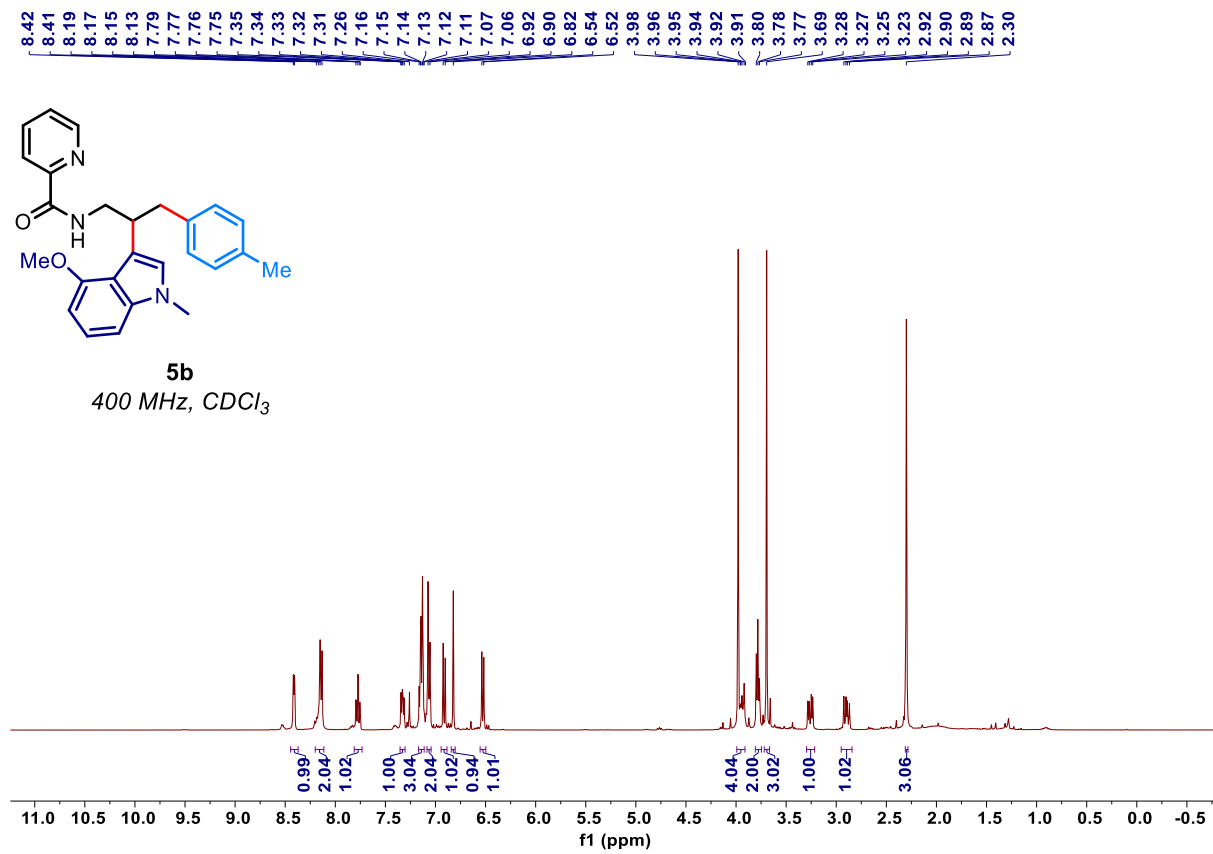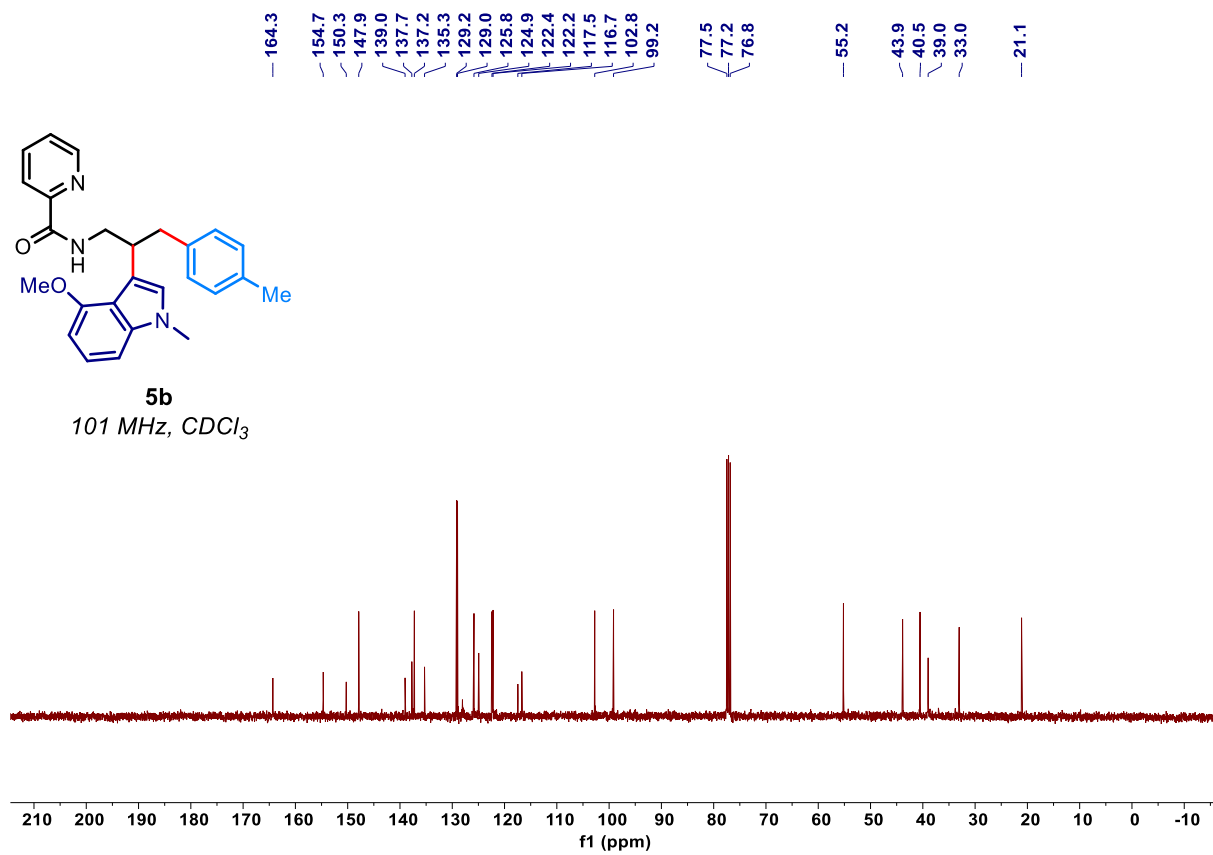



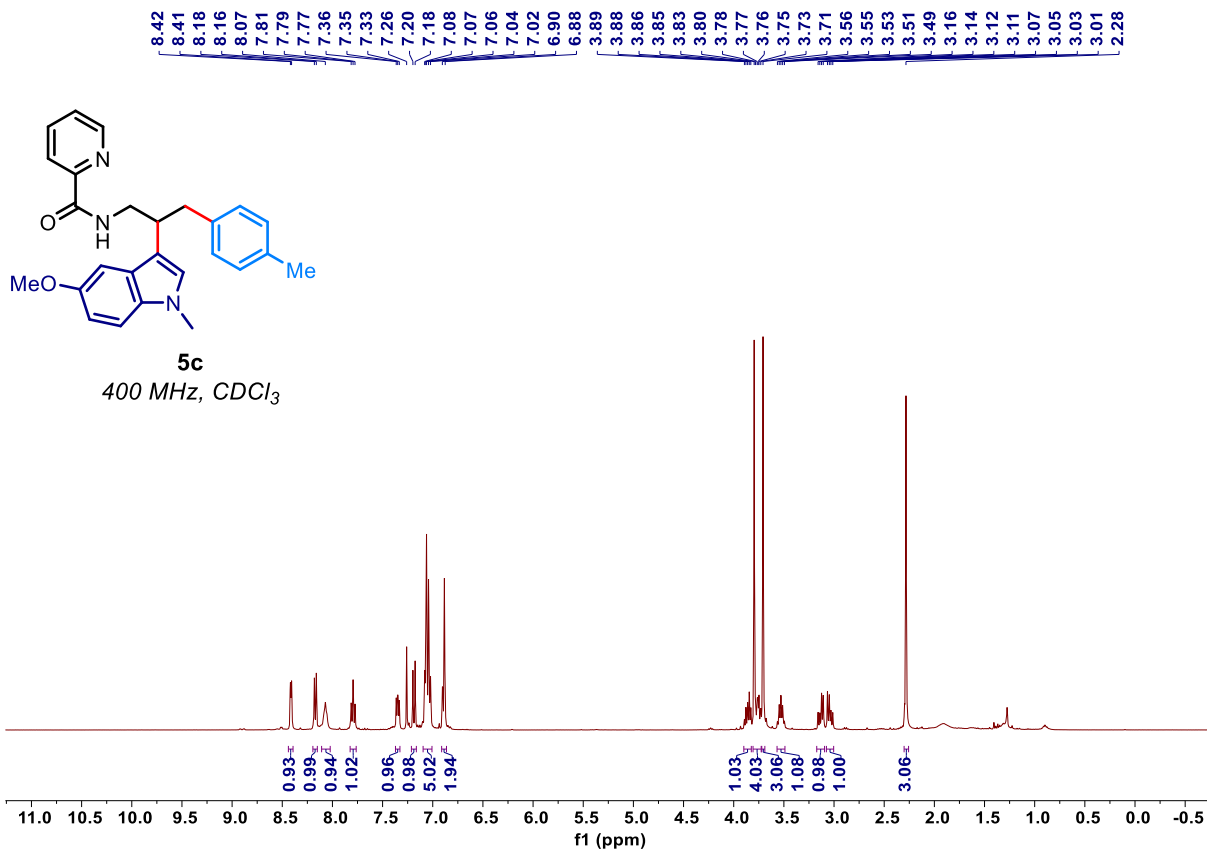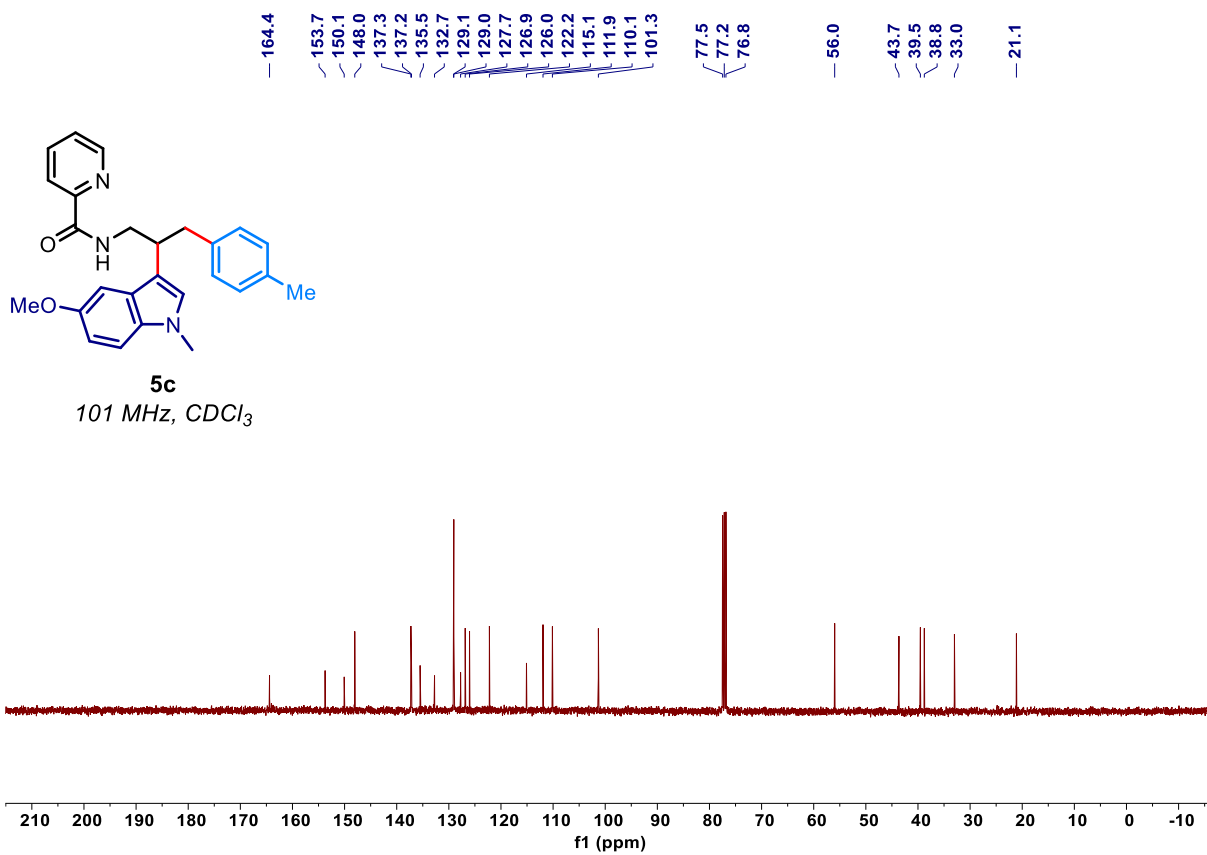

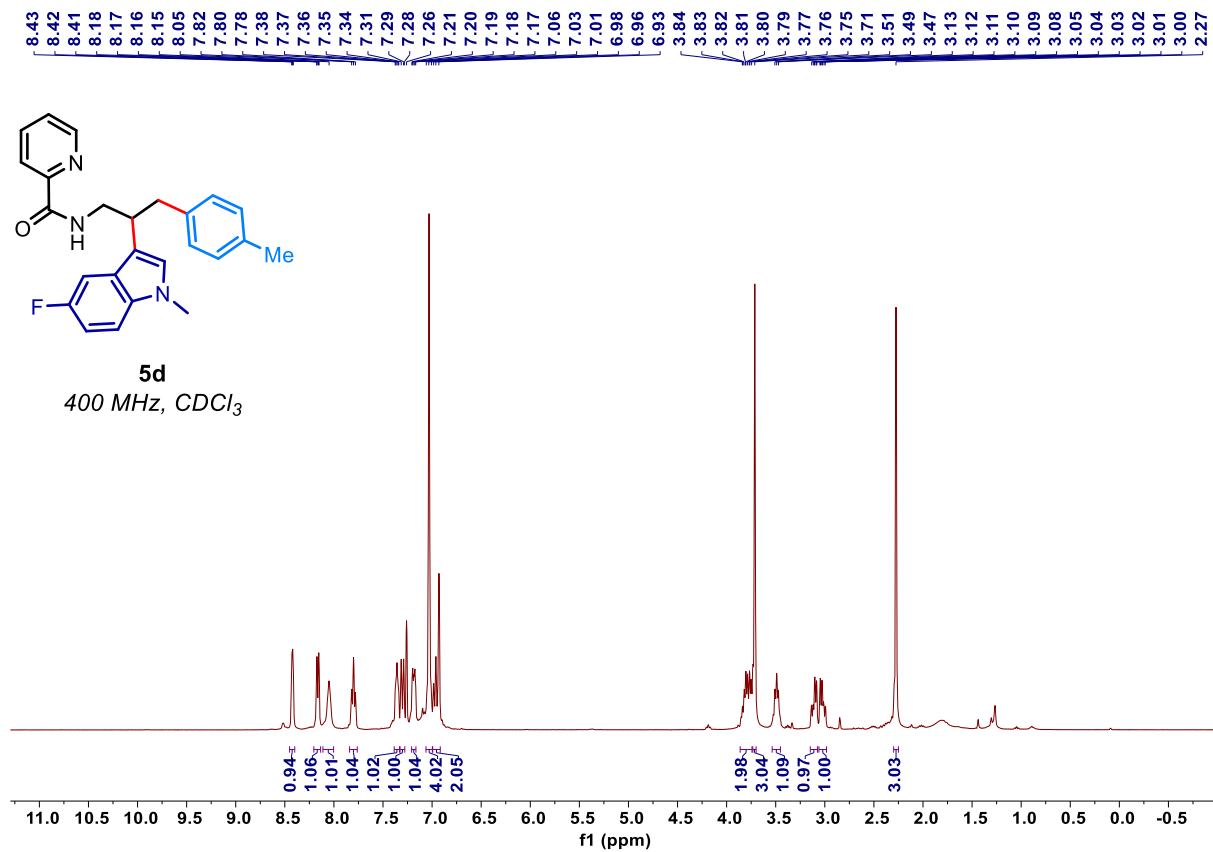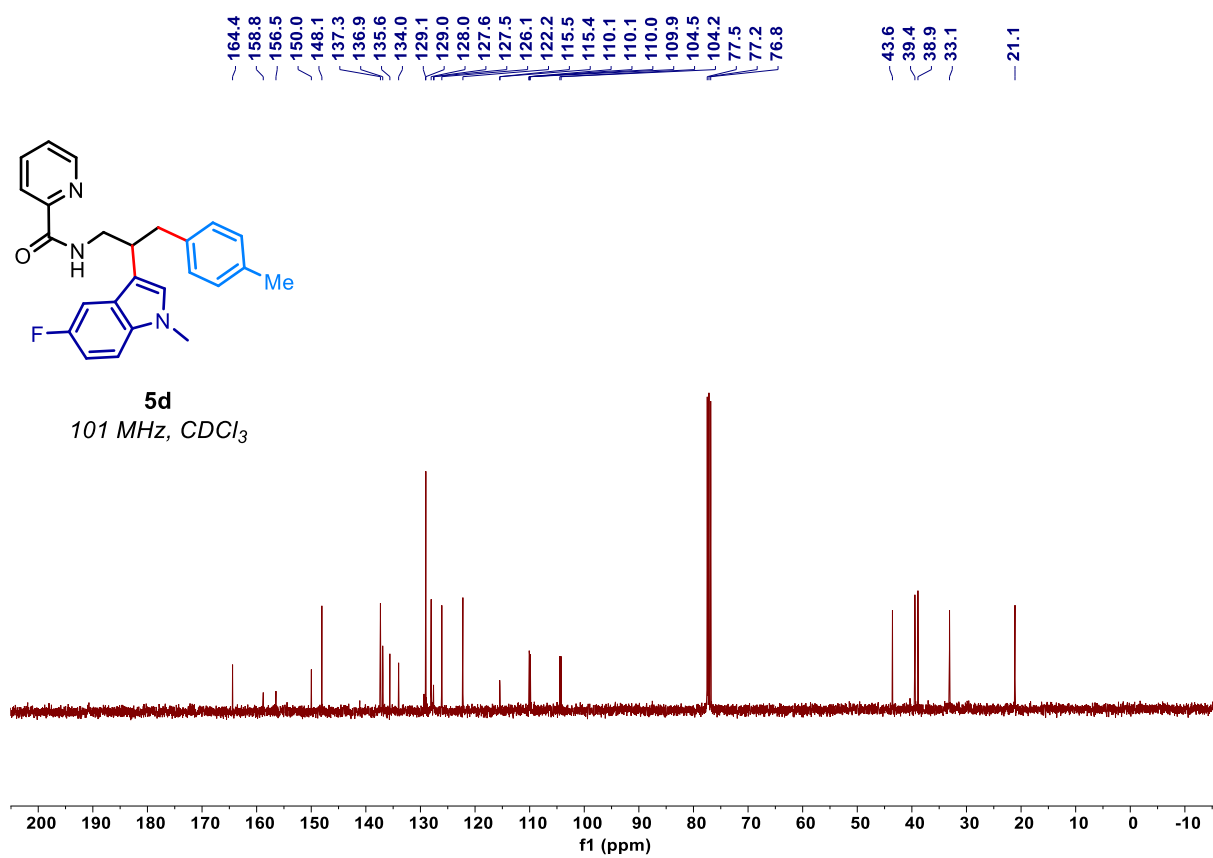

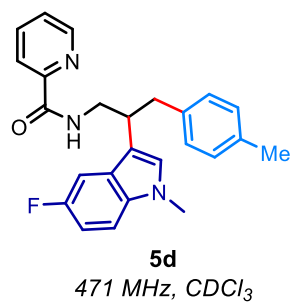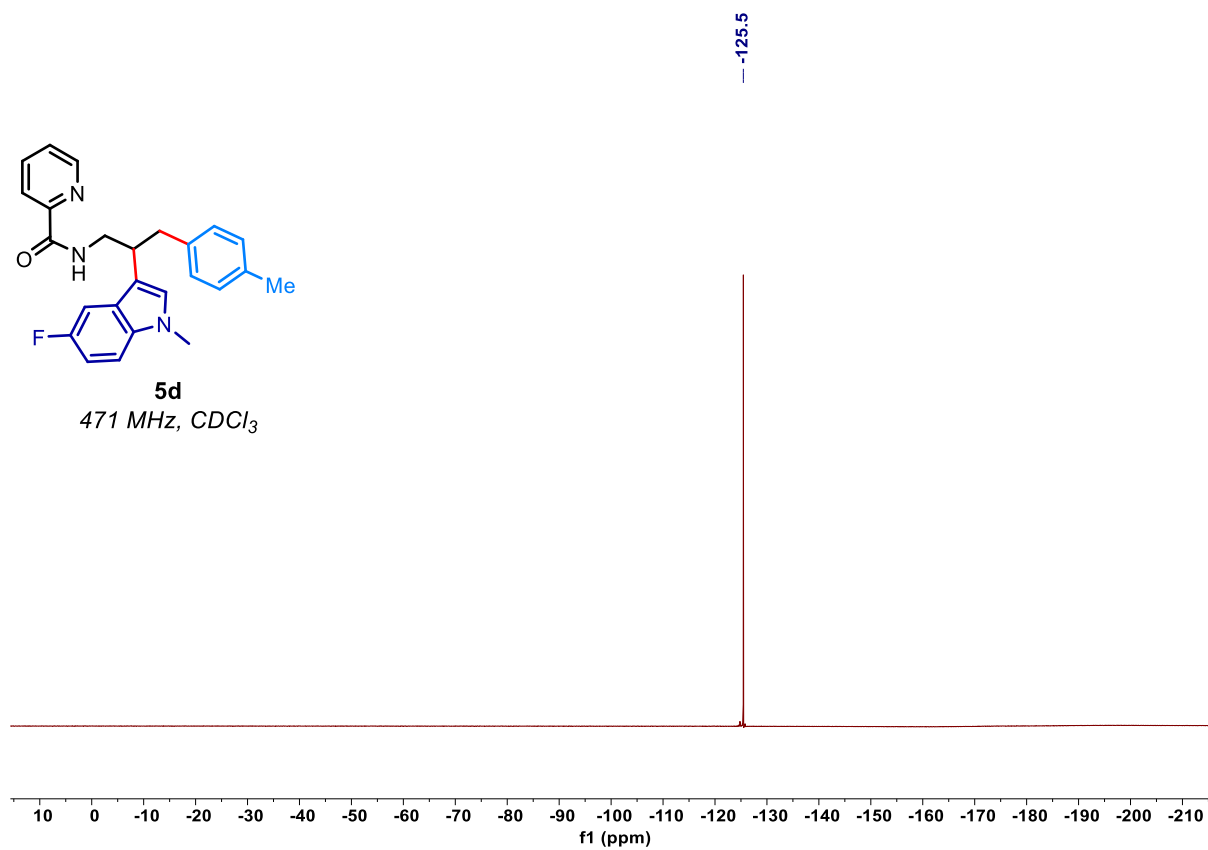

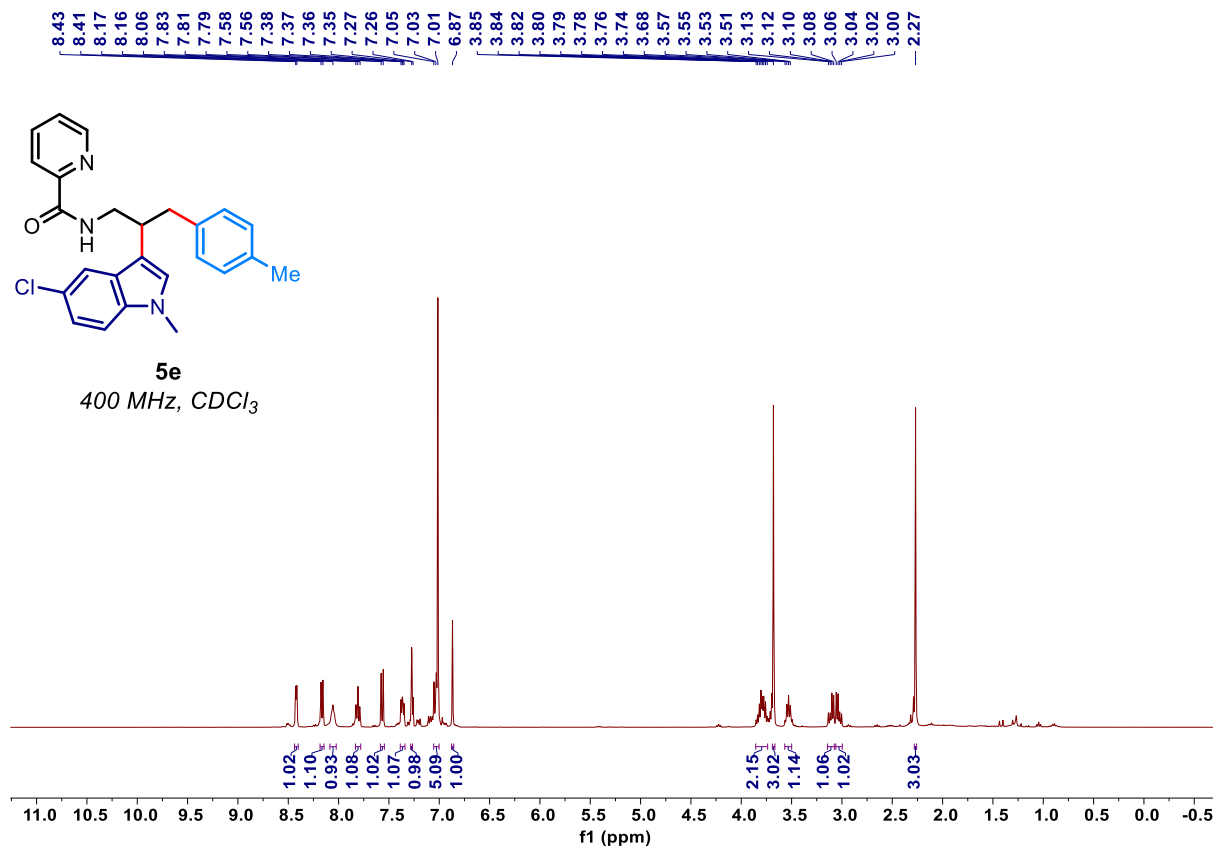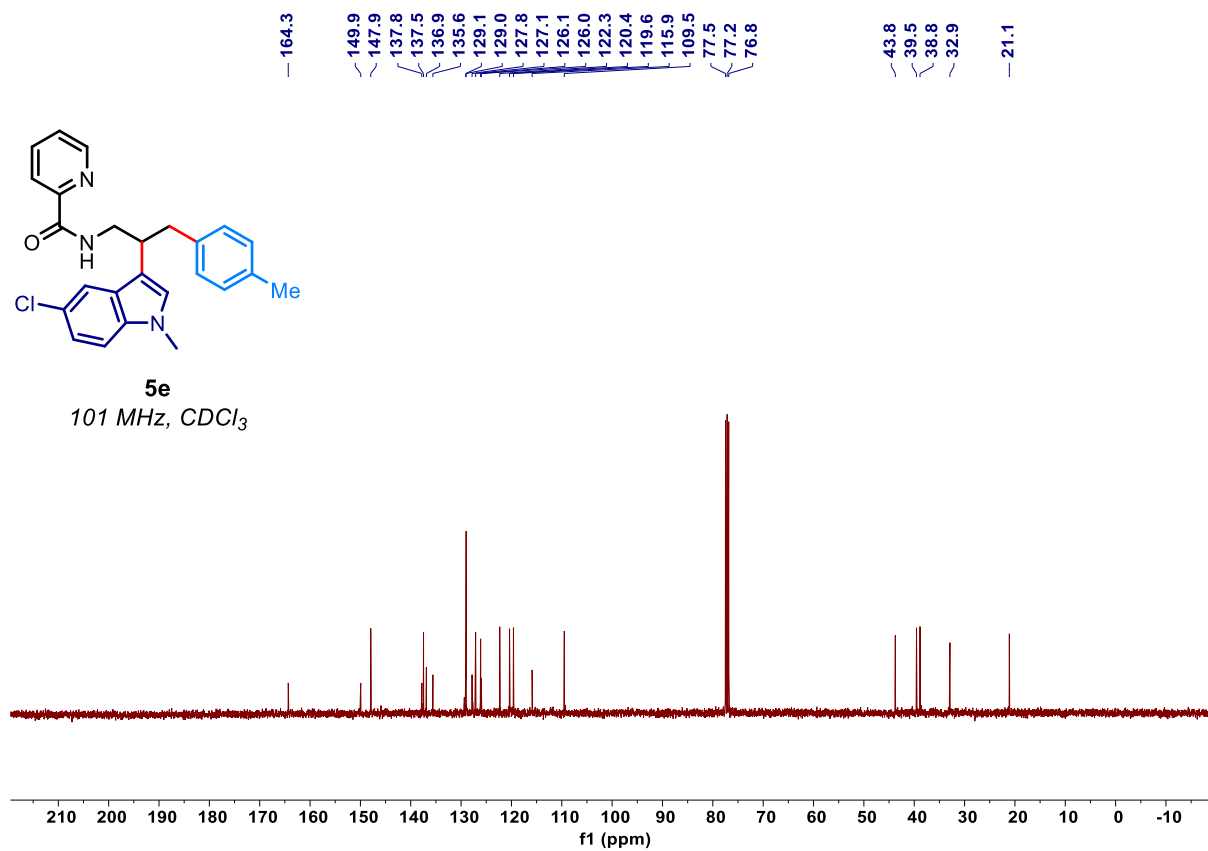

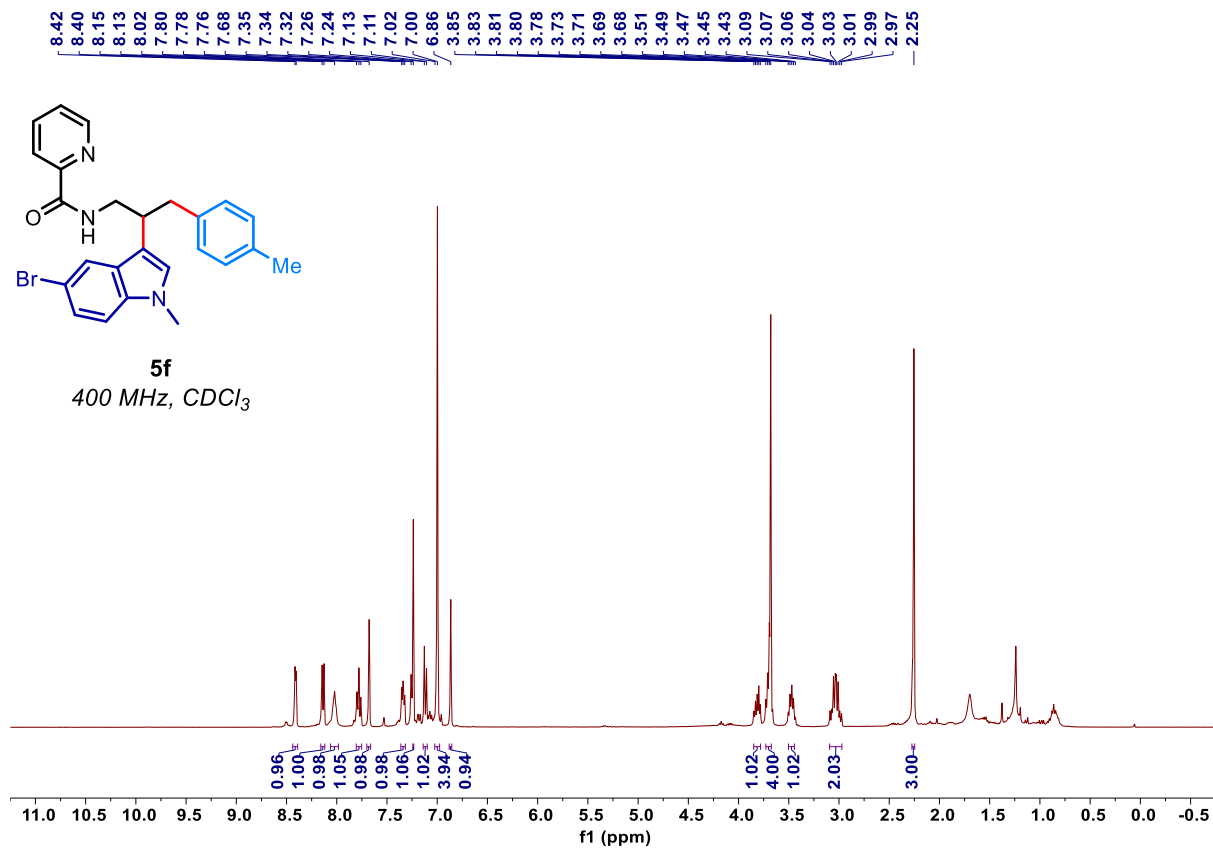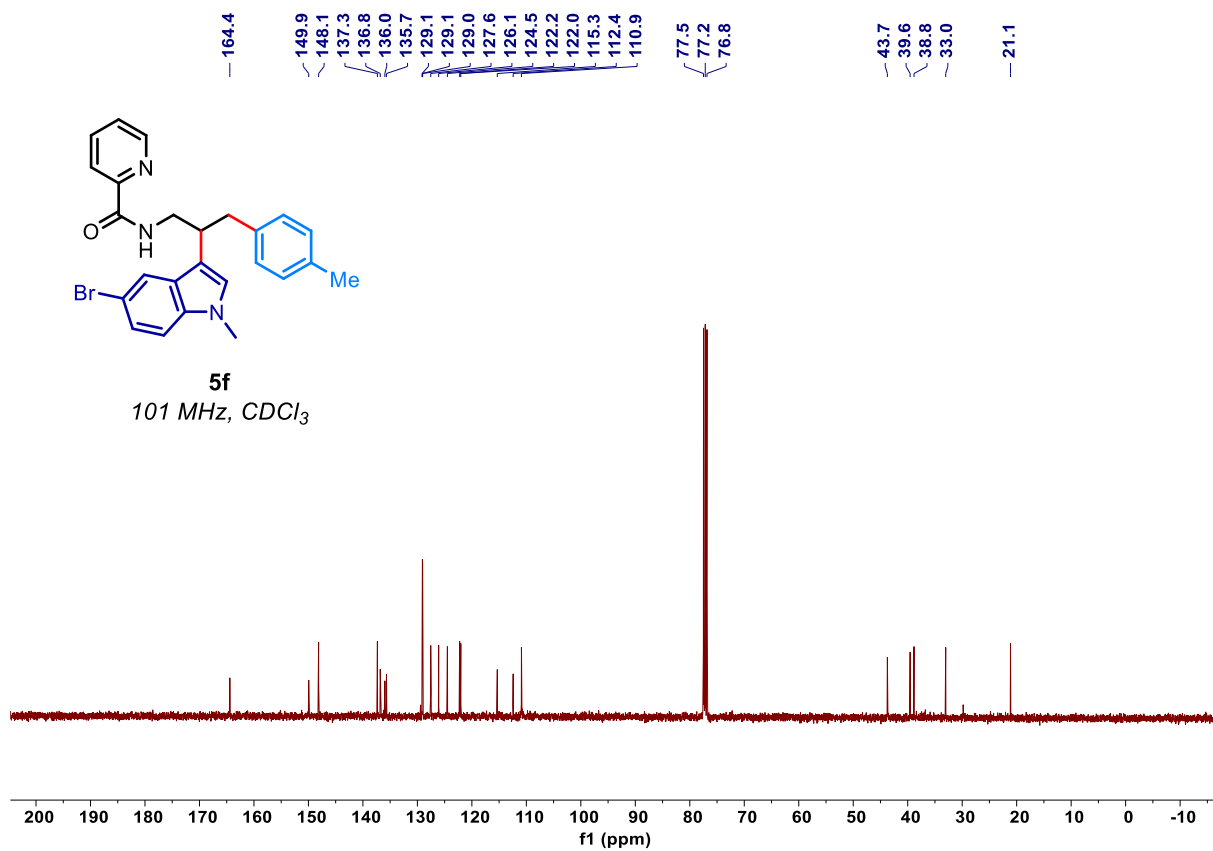

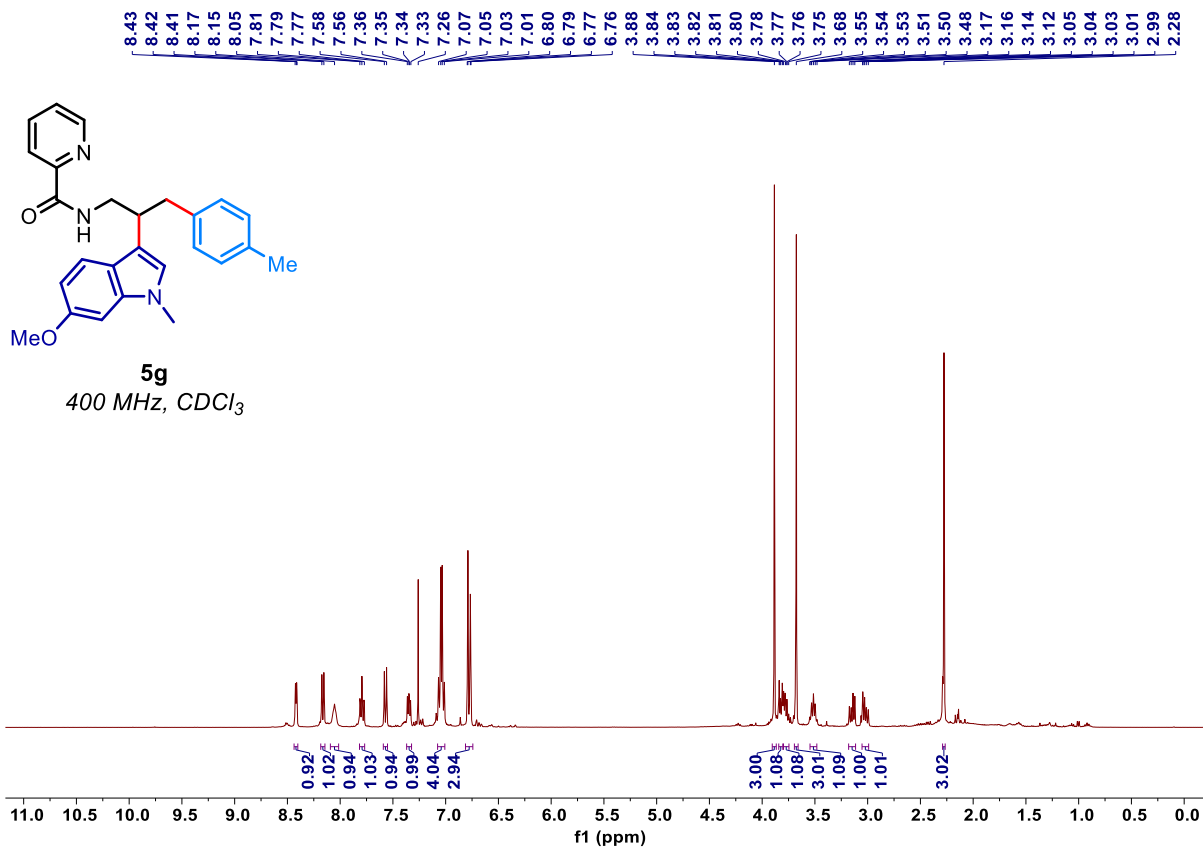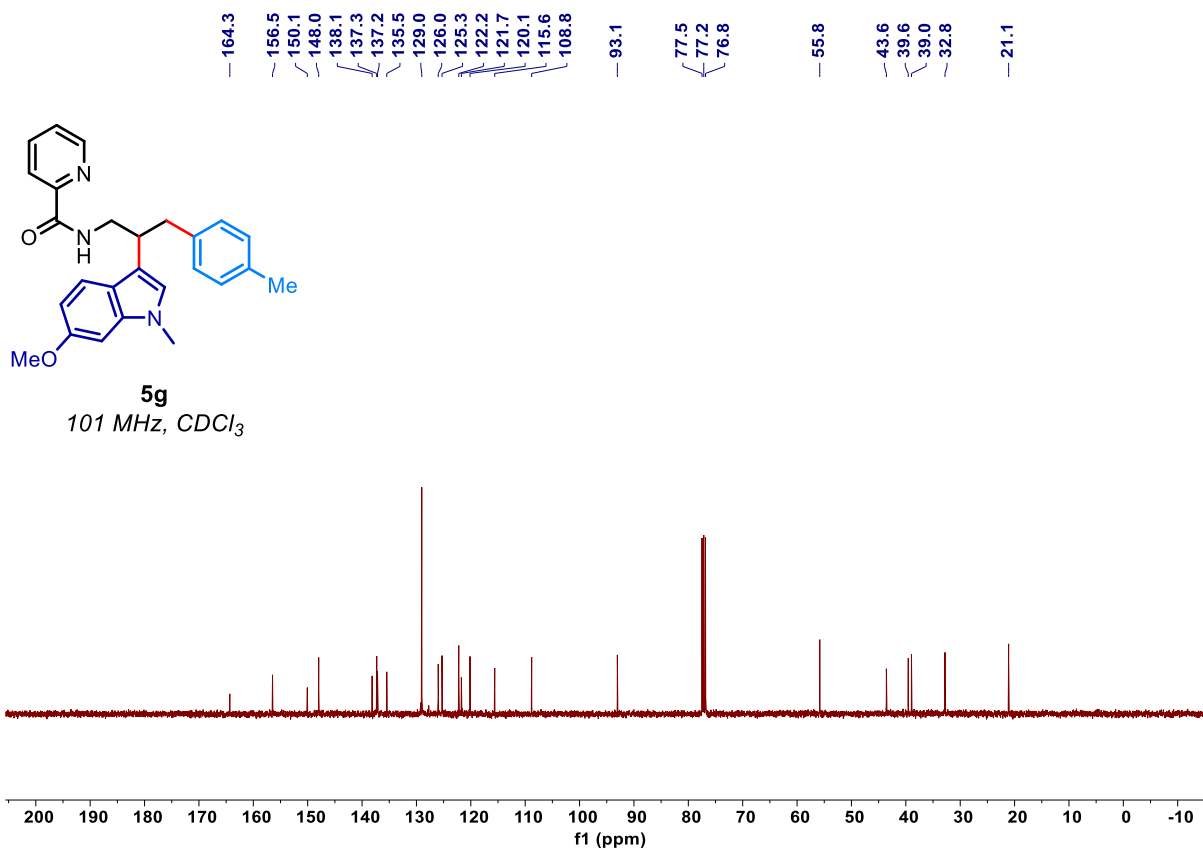

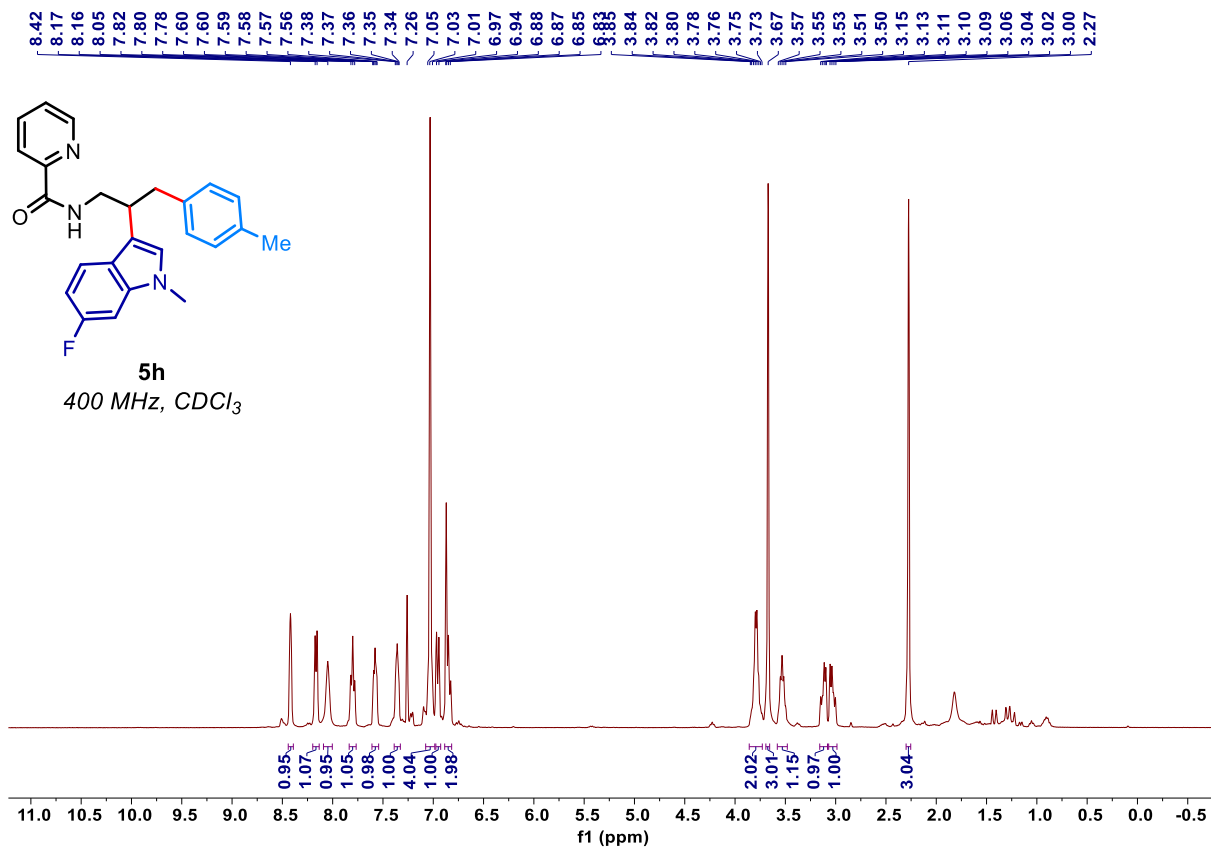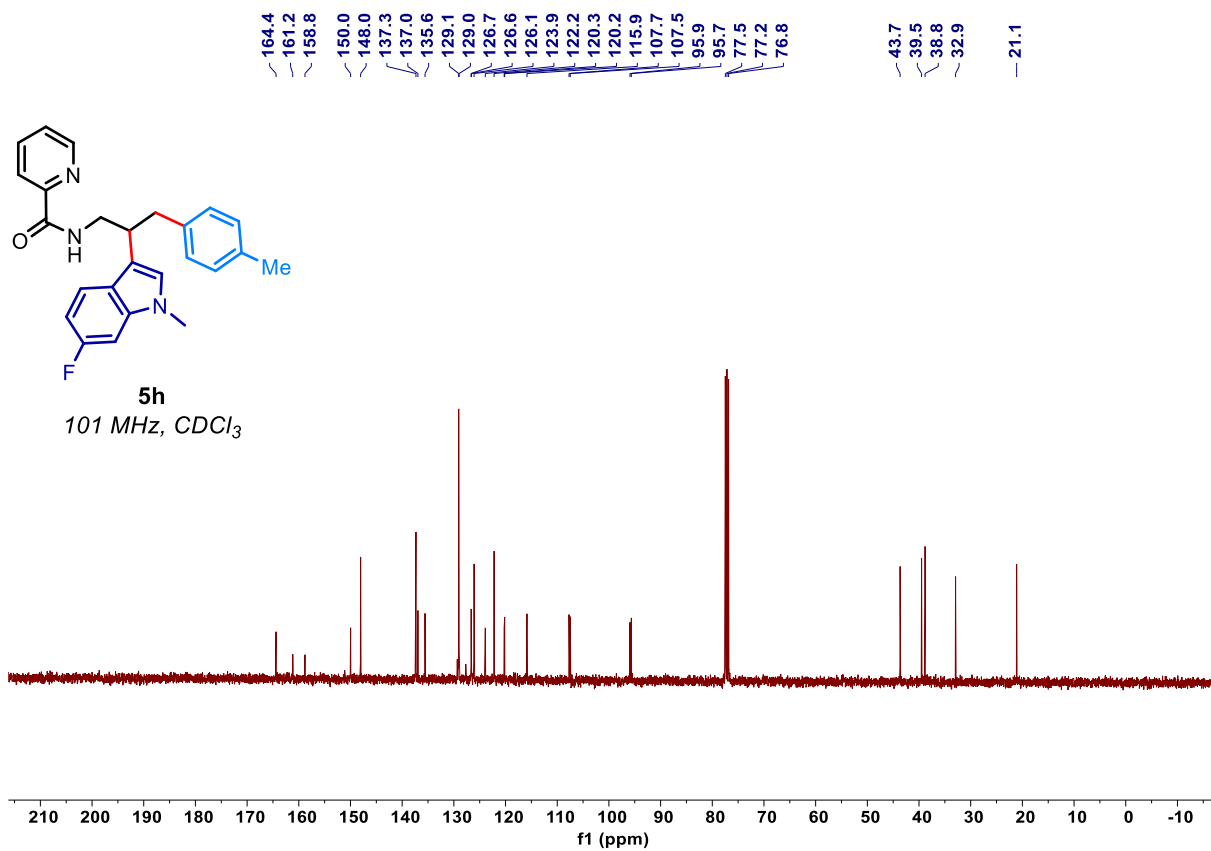

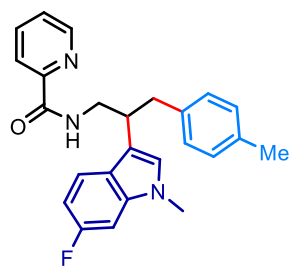

**5h**  
471MHz, CDCl<sub>3</sub>

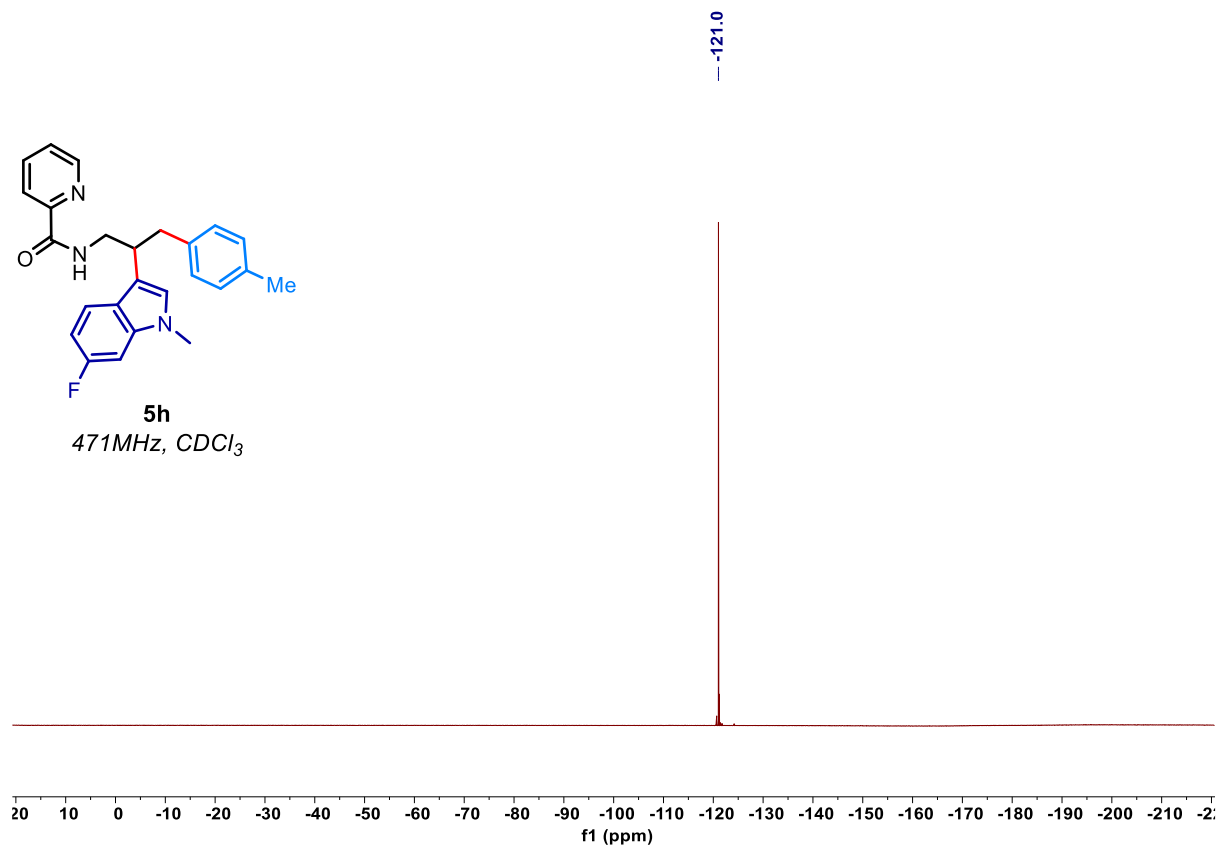



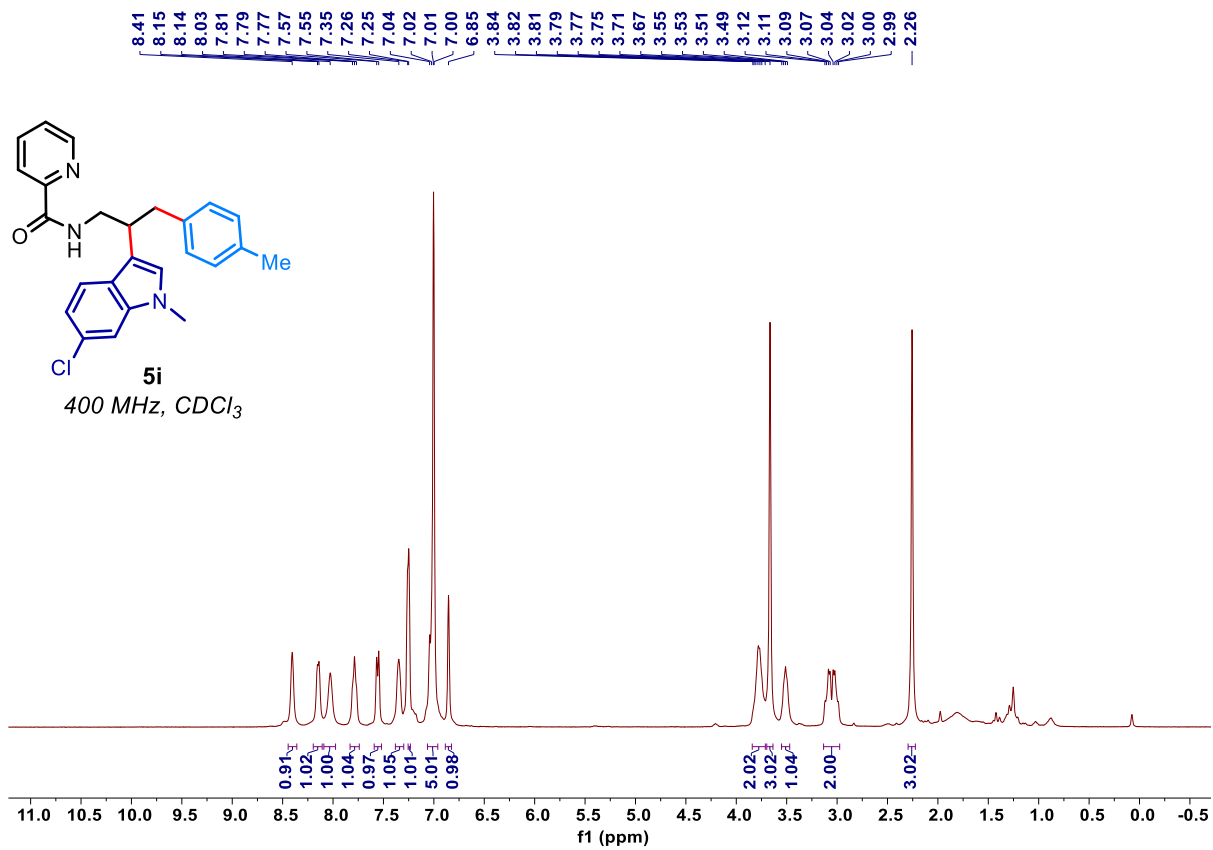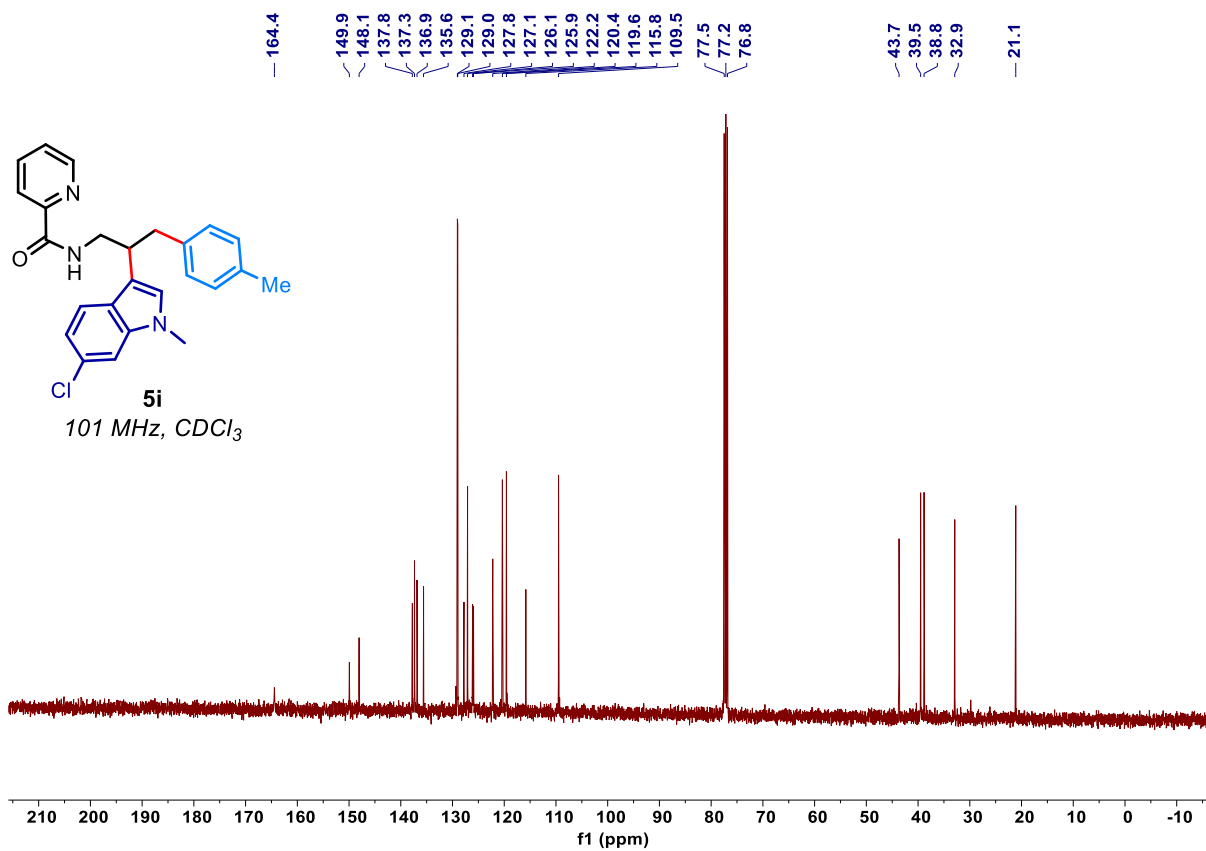

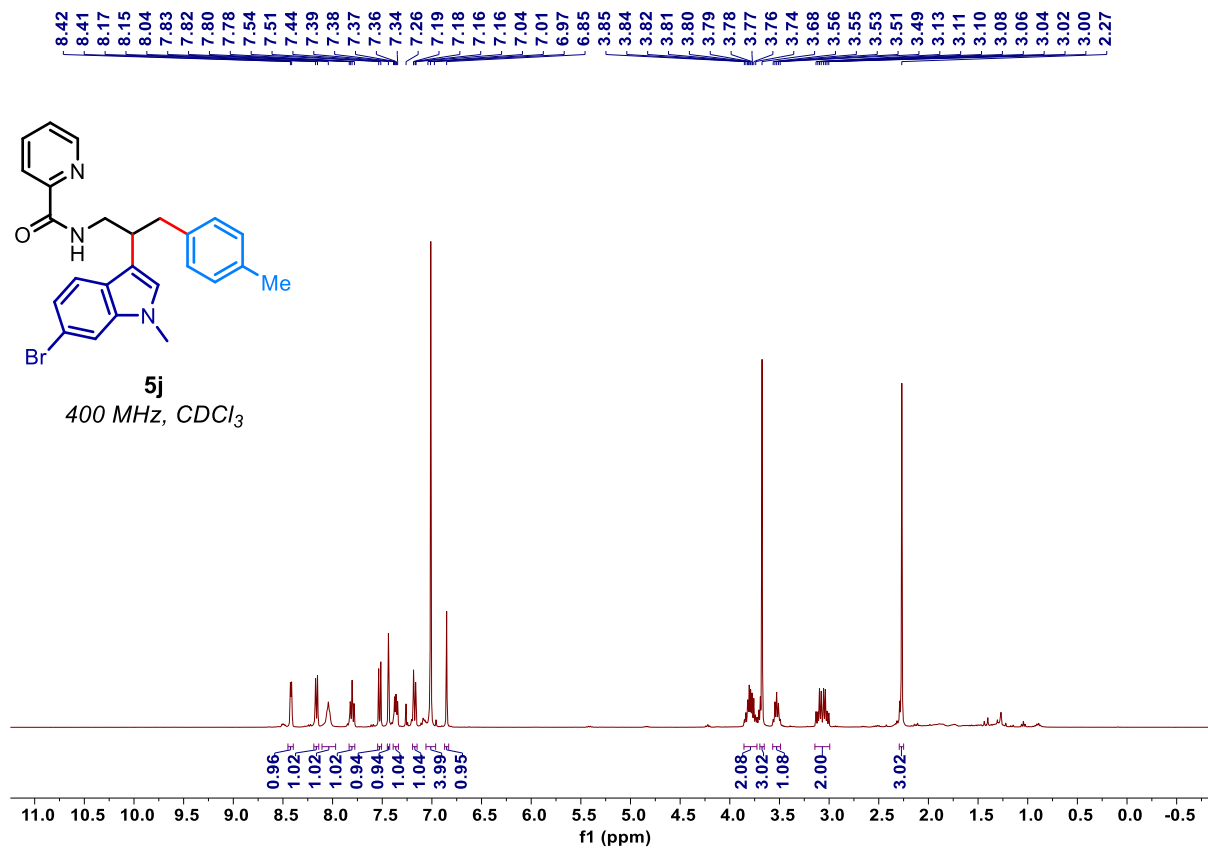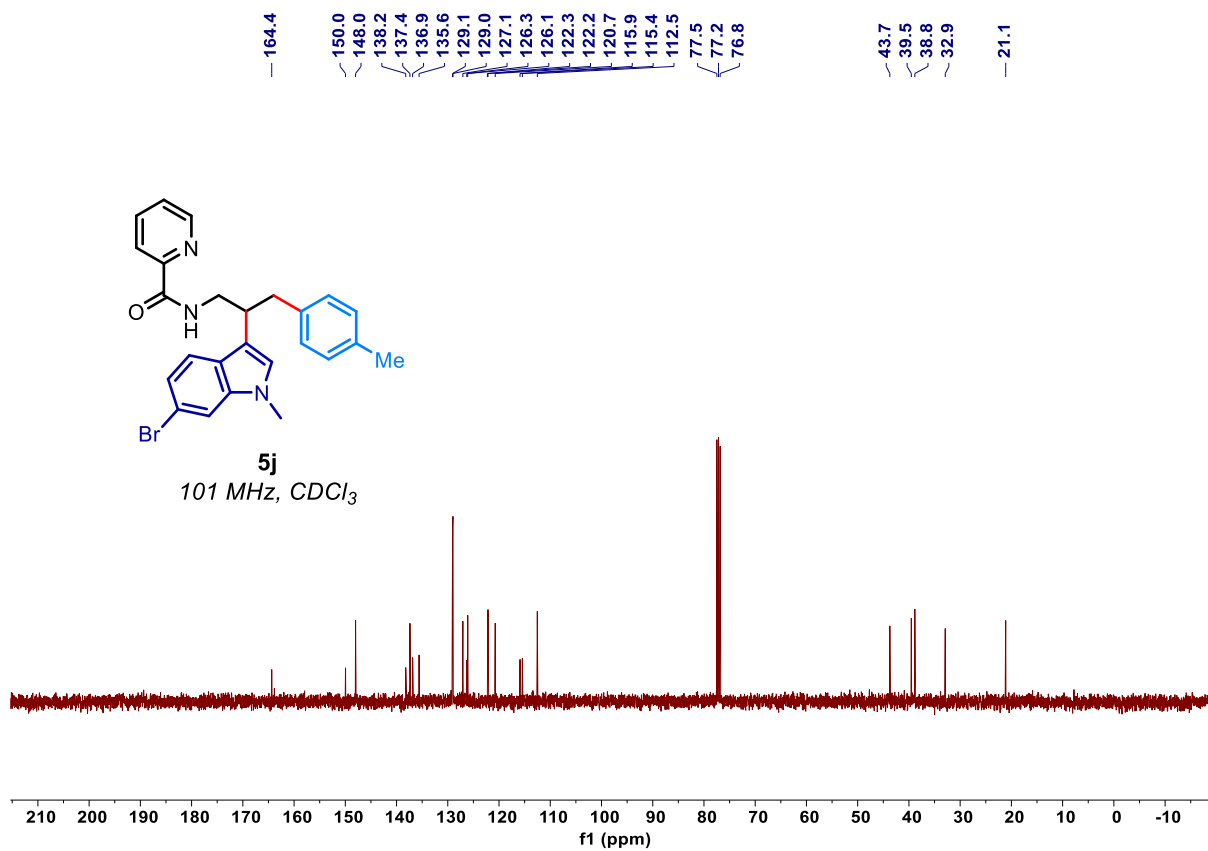

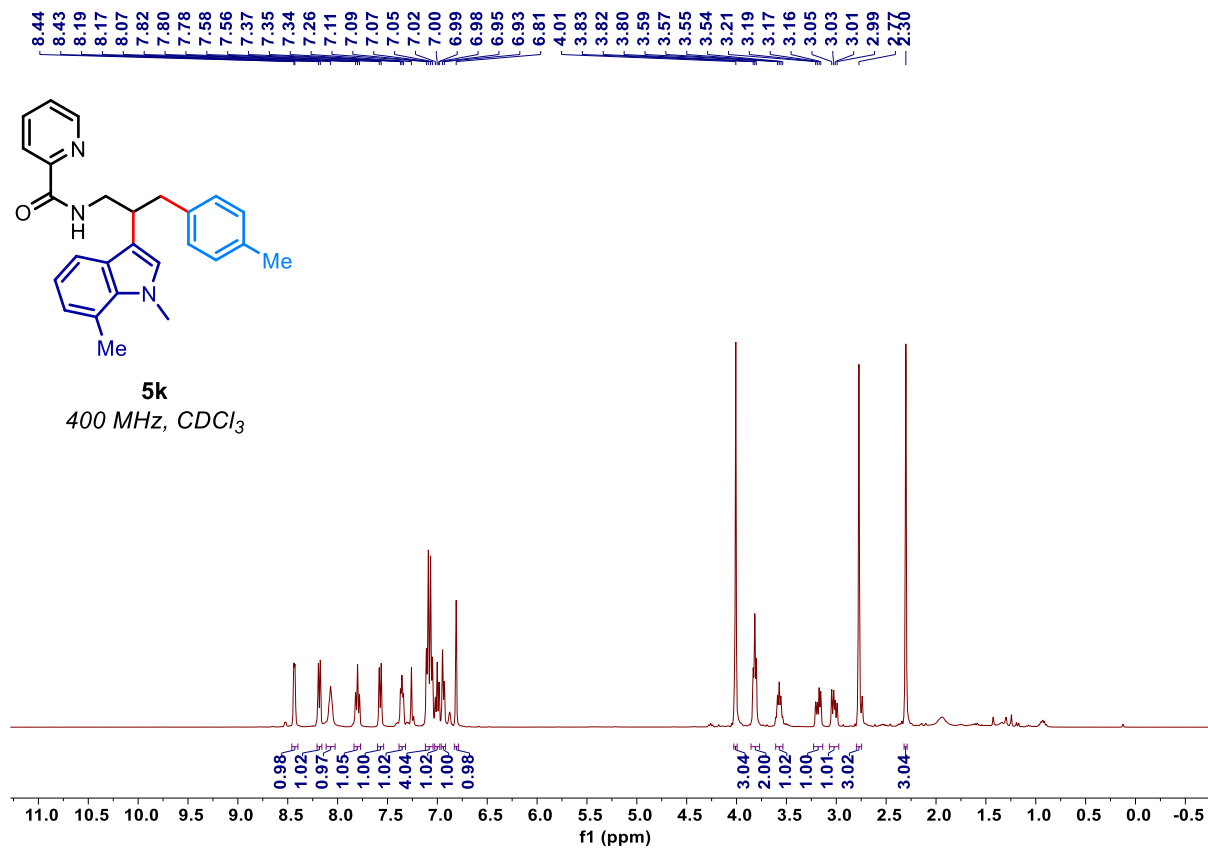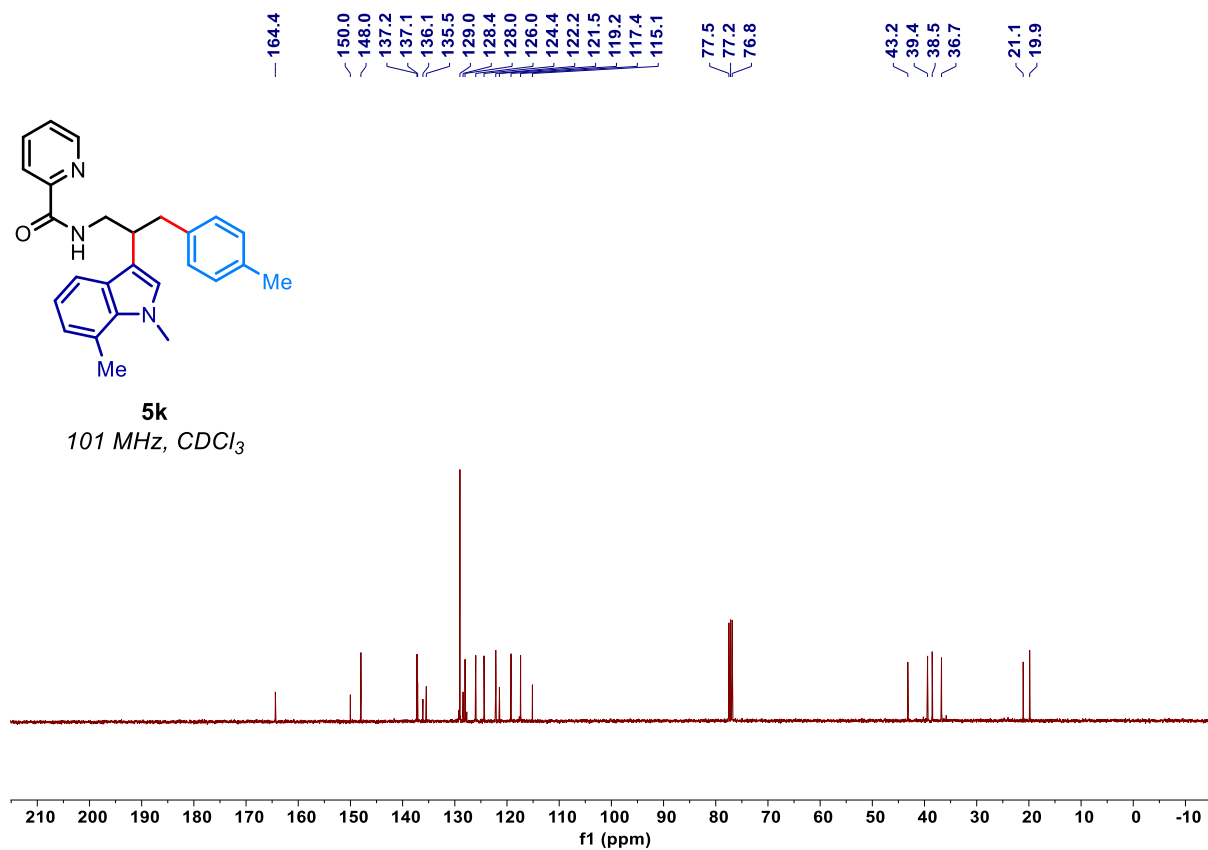

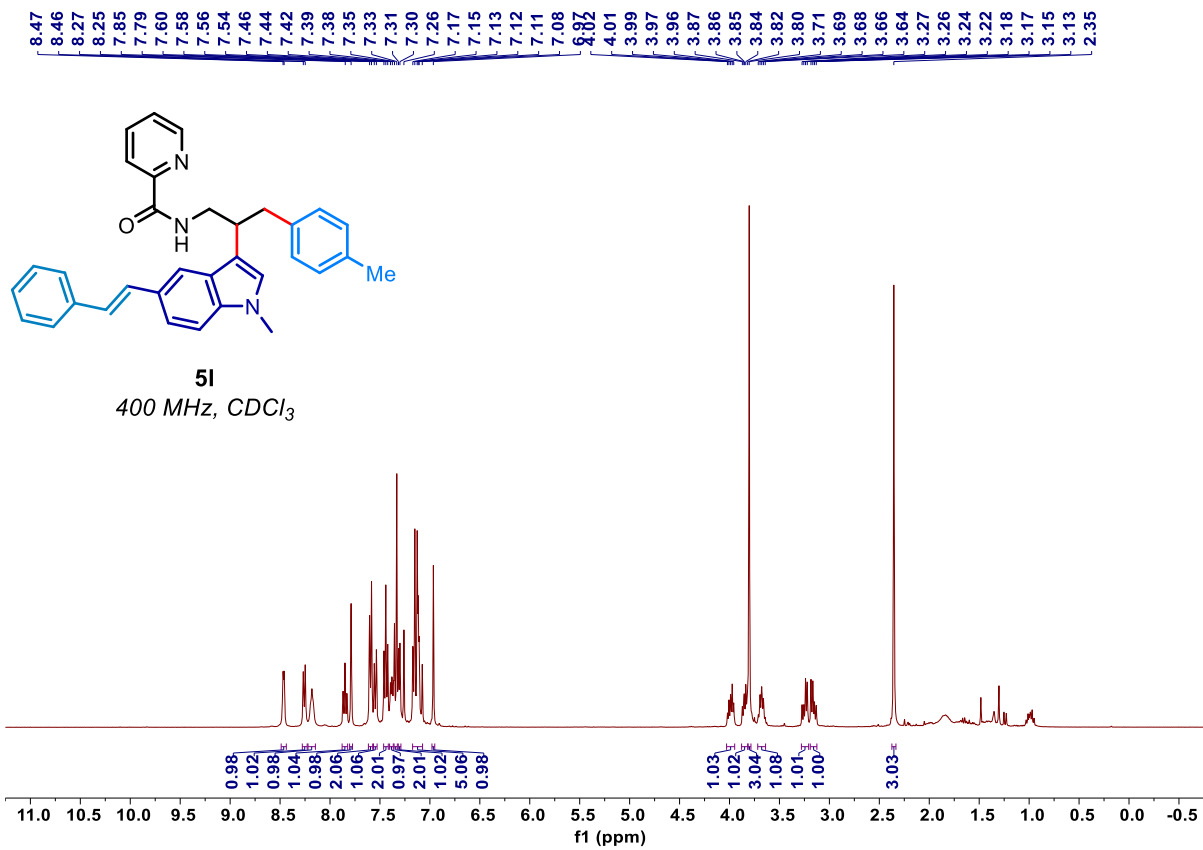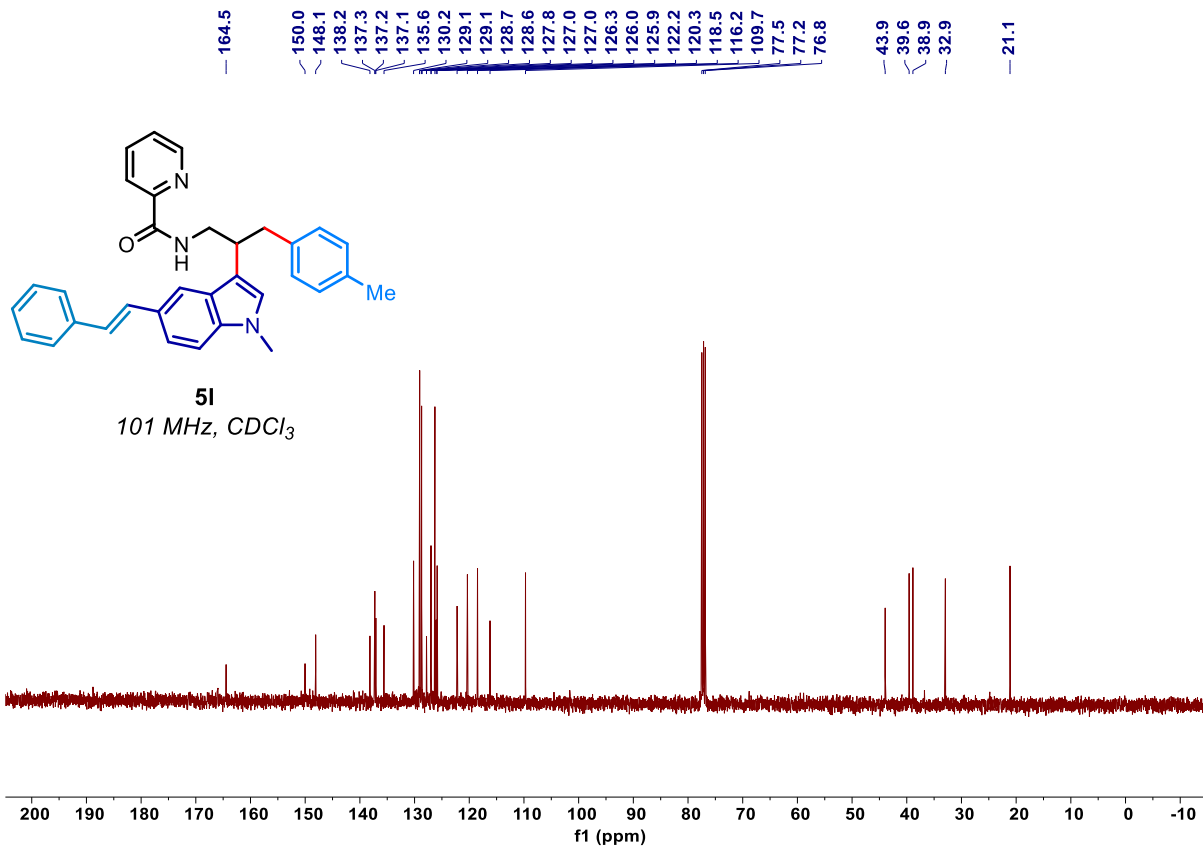

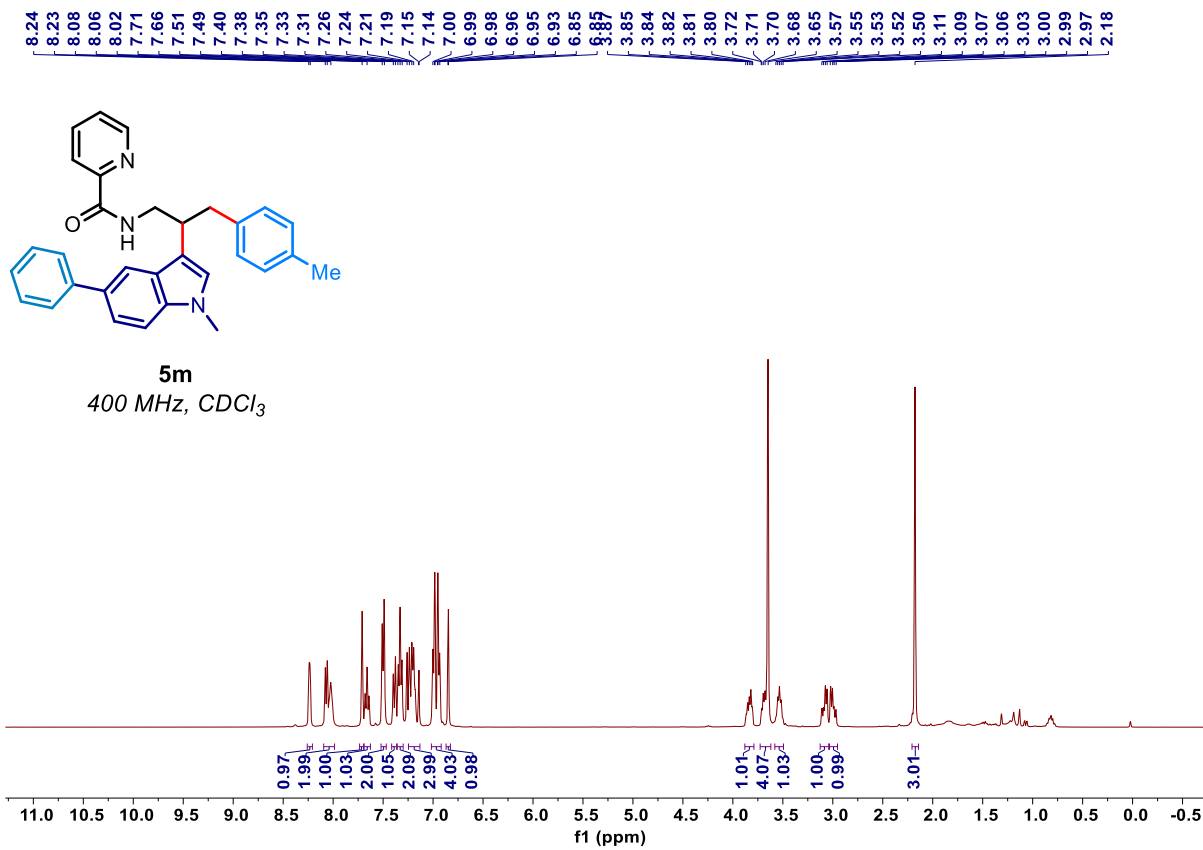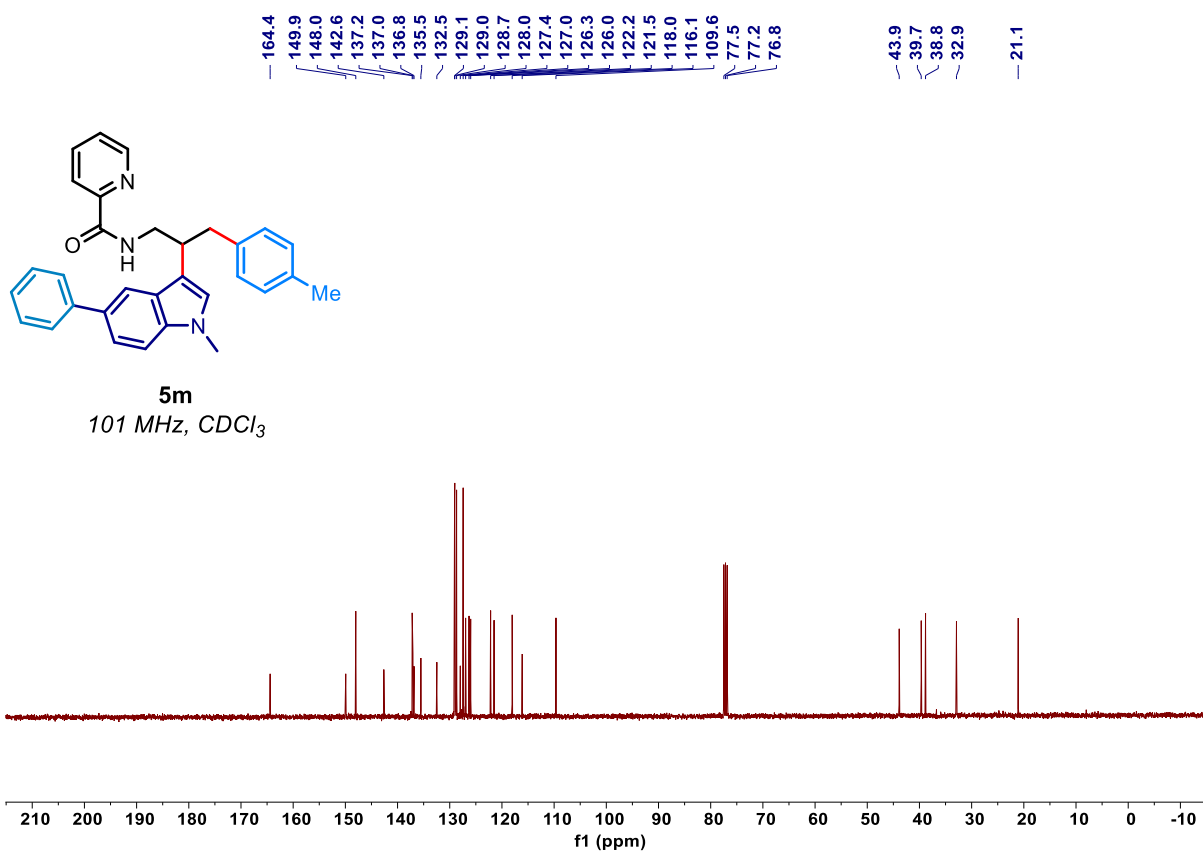

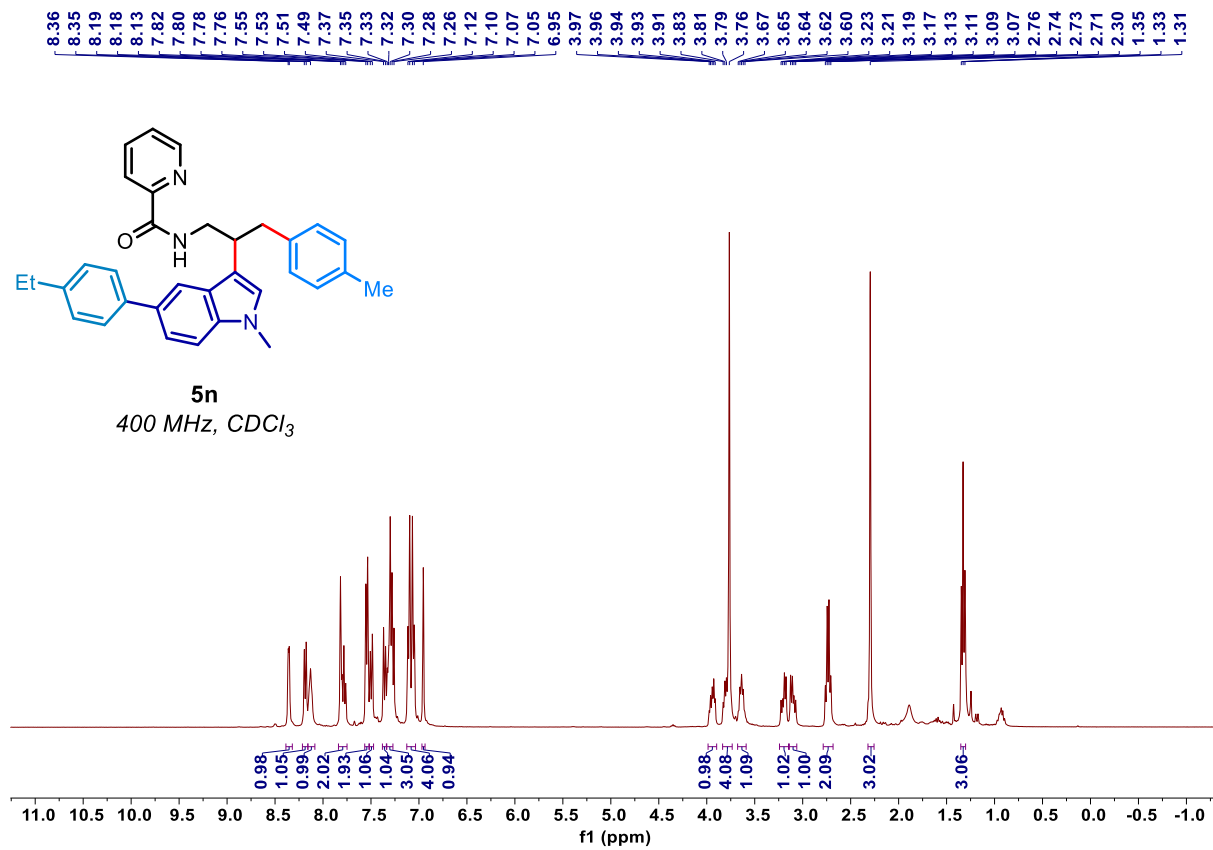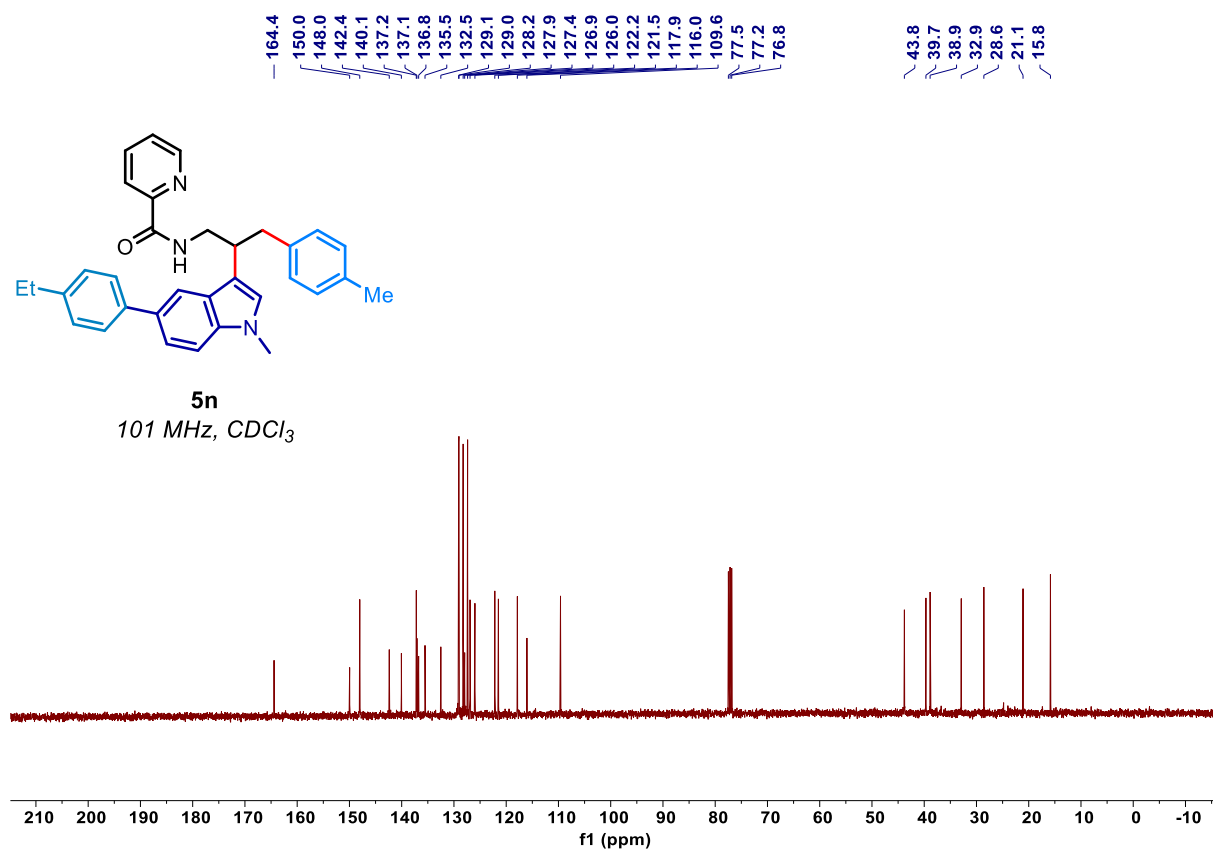

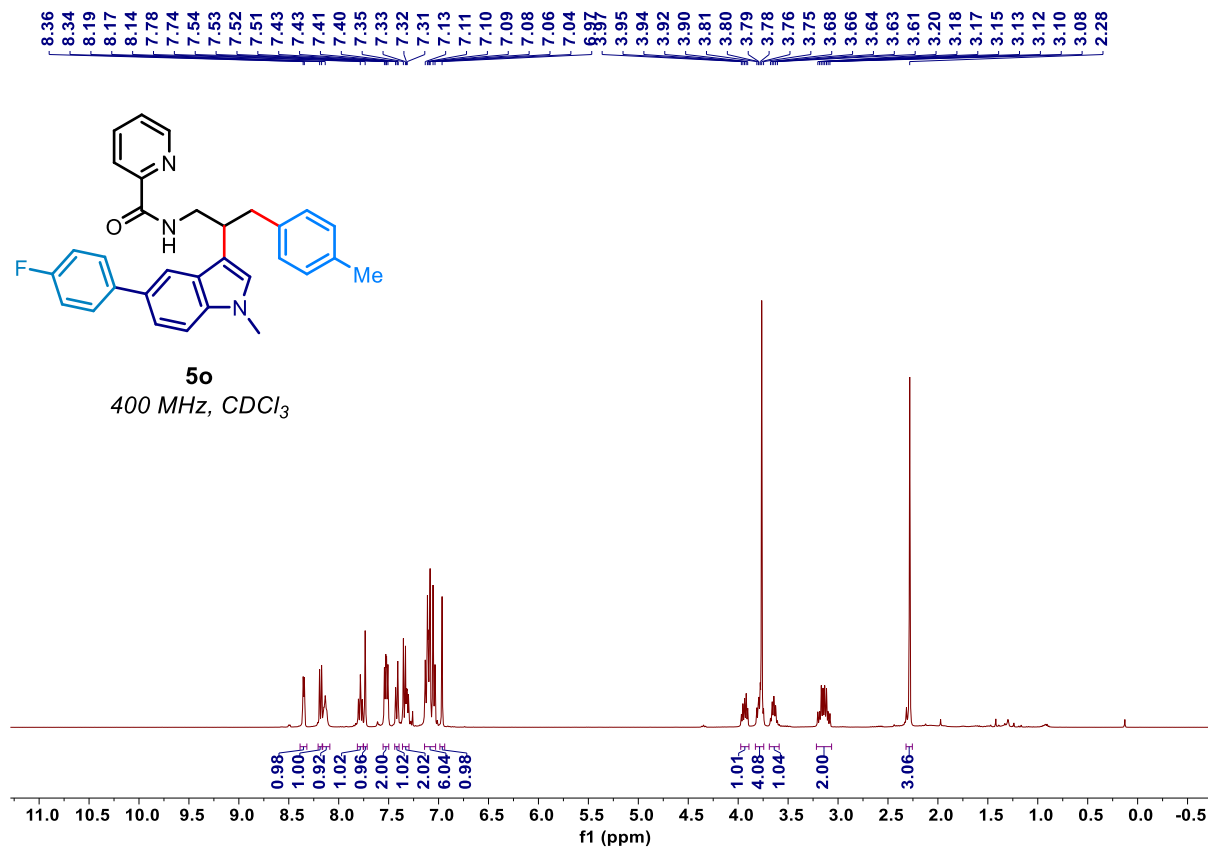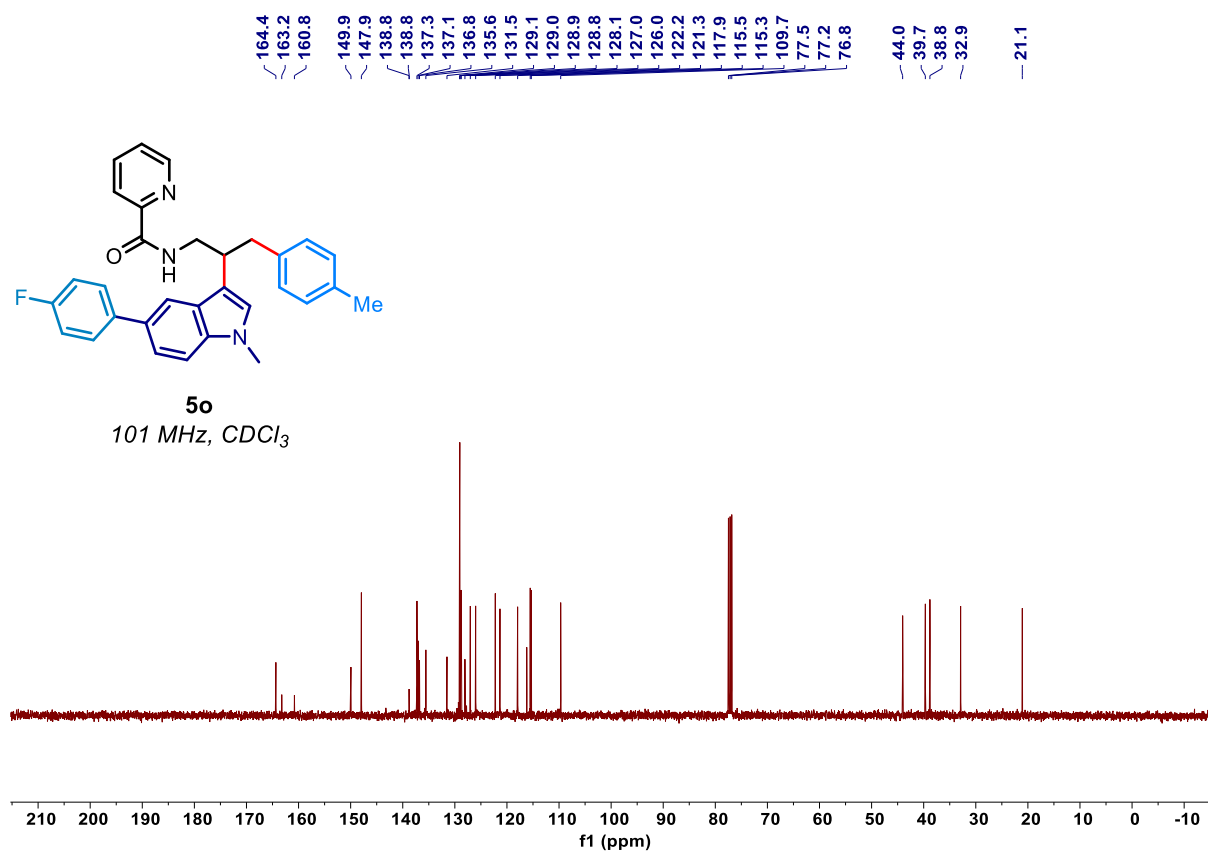

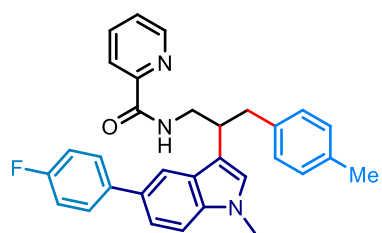

**5o**  
471 MHz, CDCl<sub>3</sub>

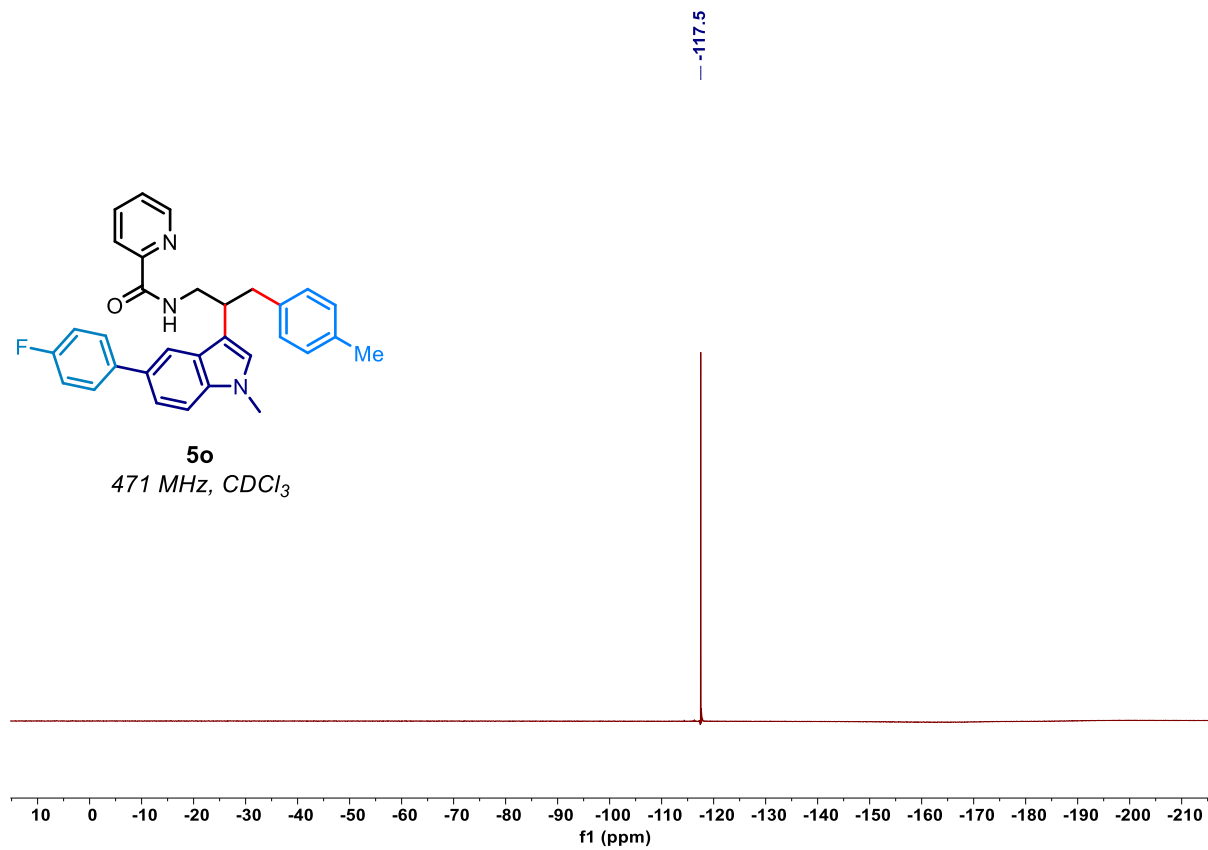



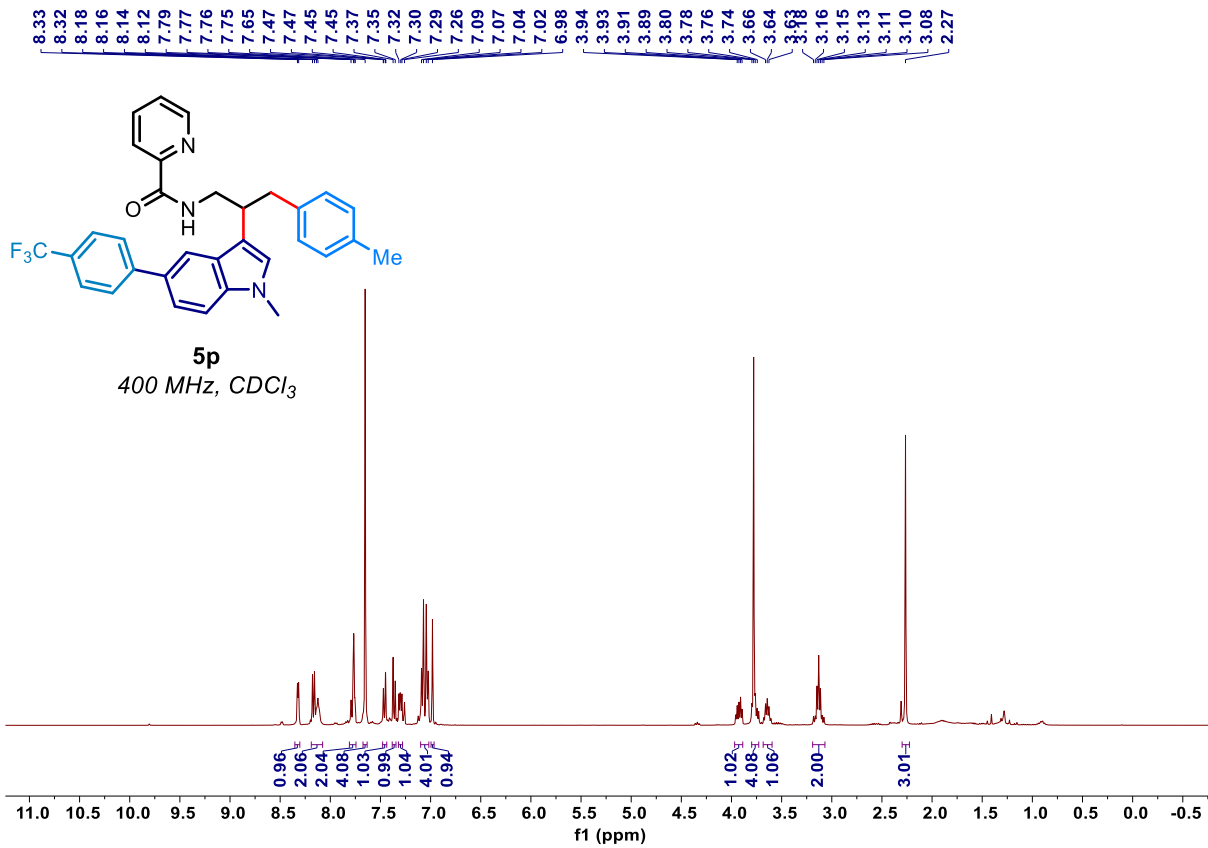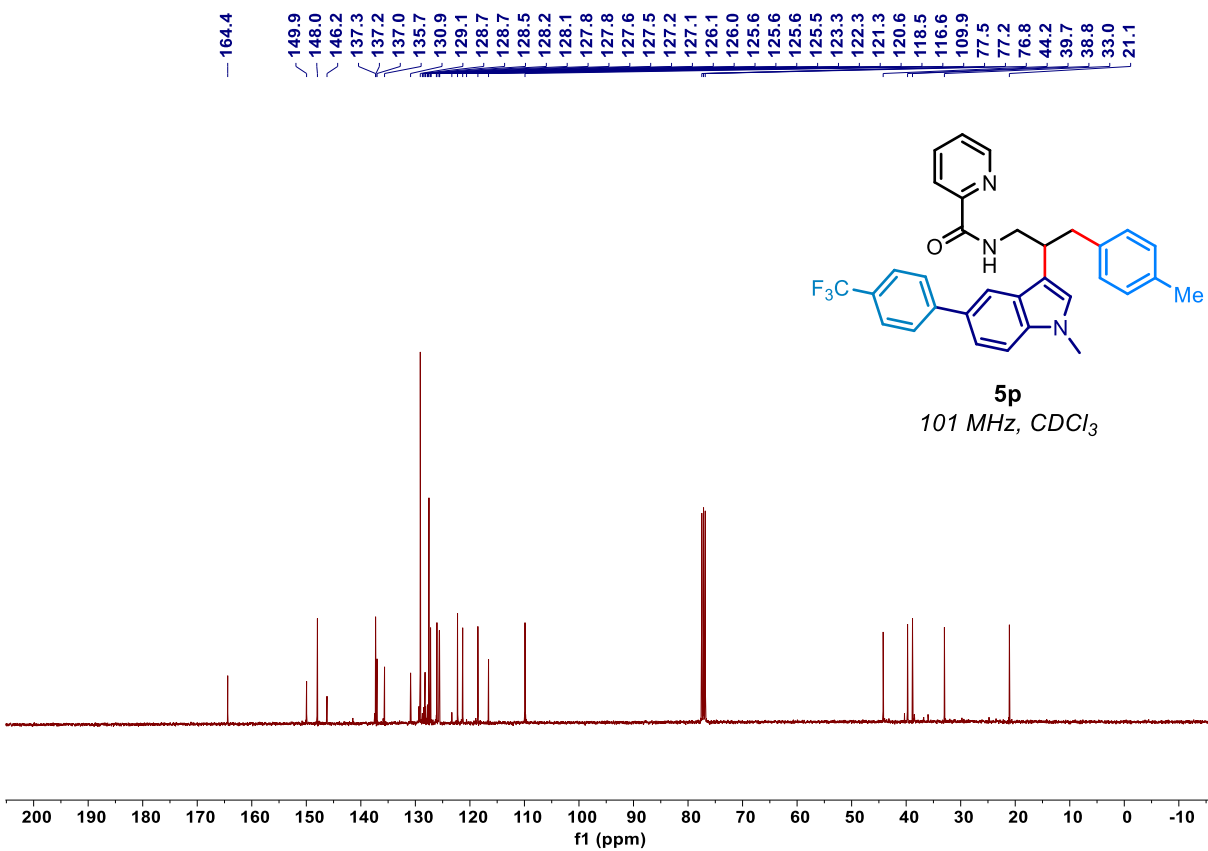

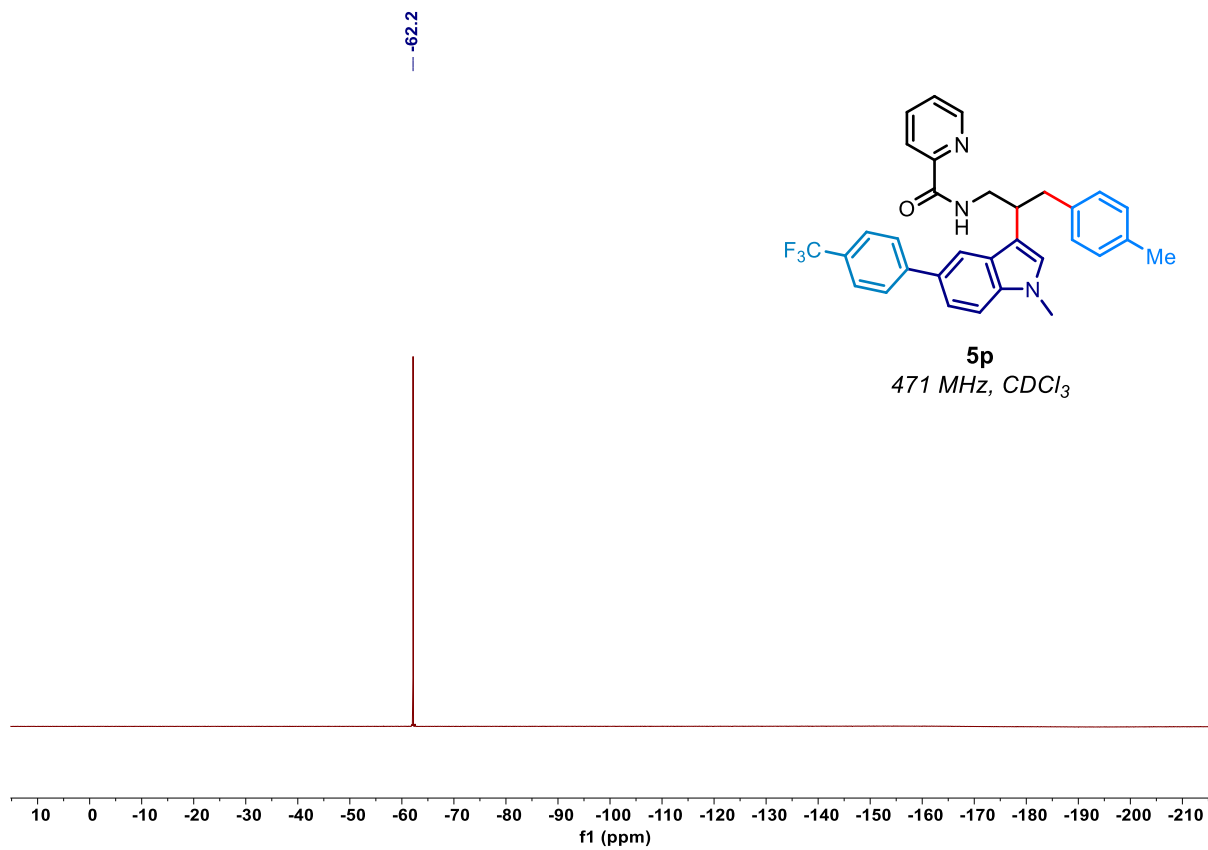

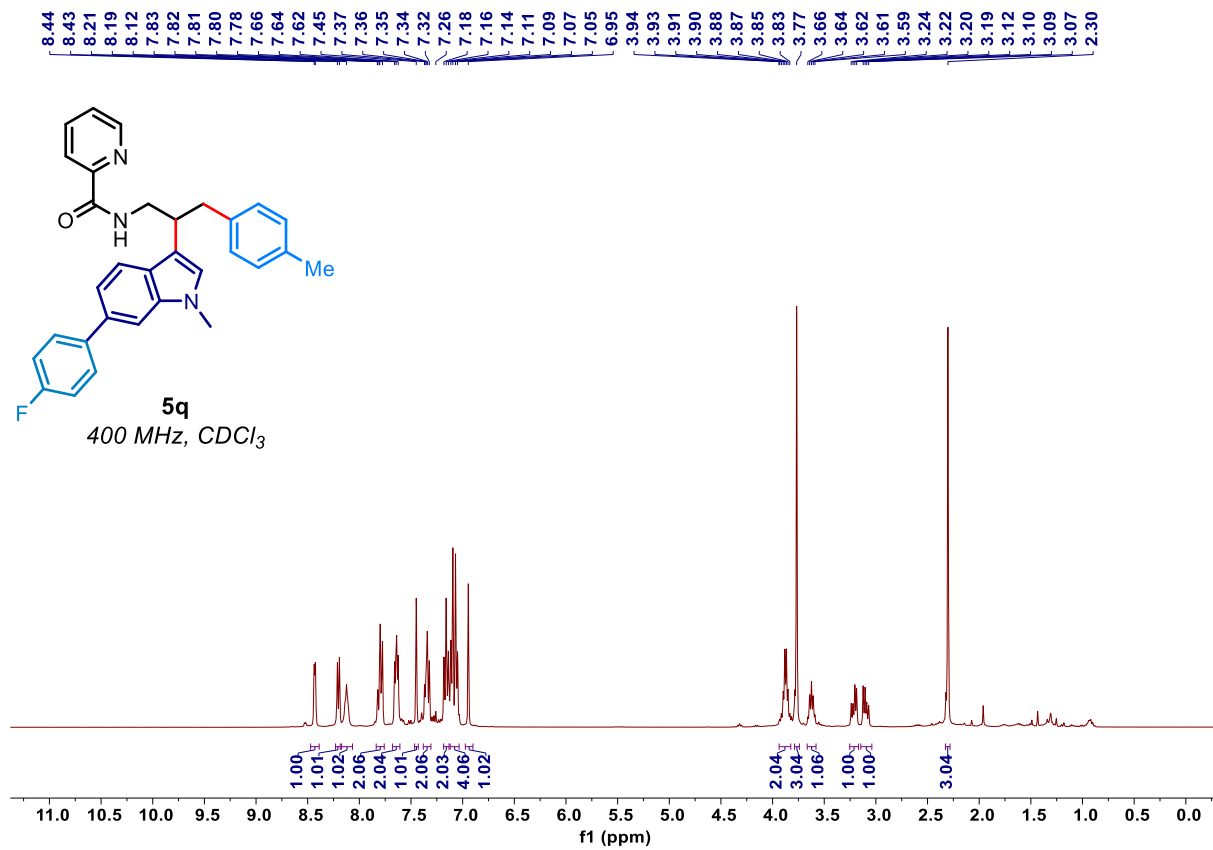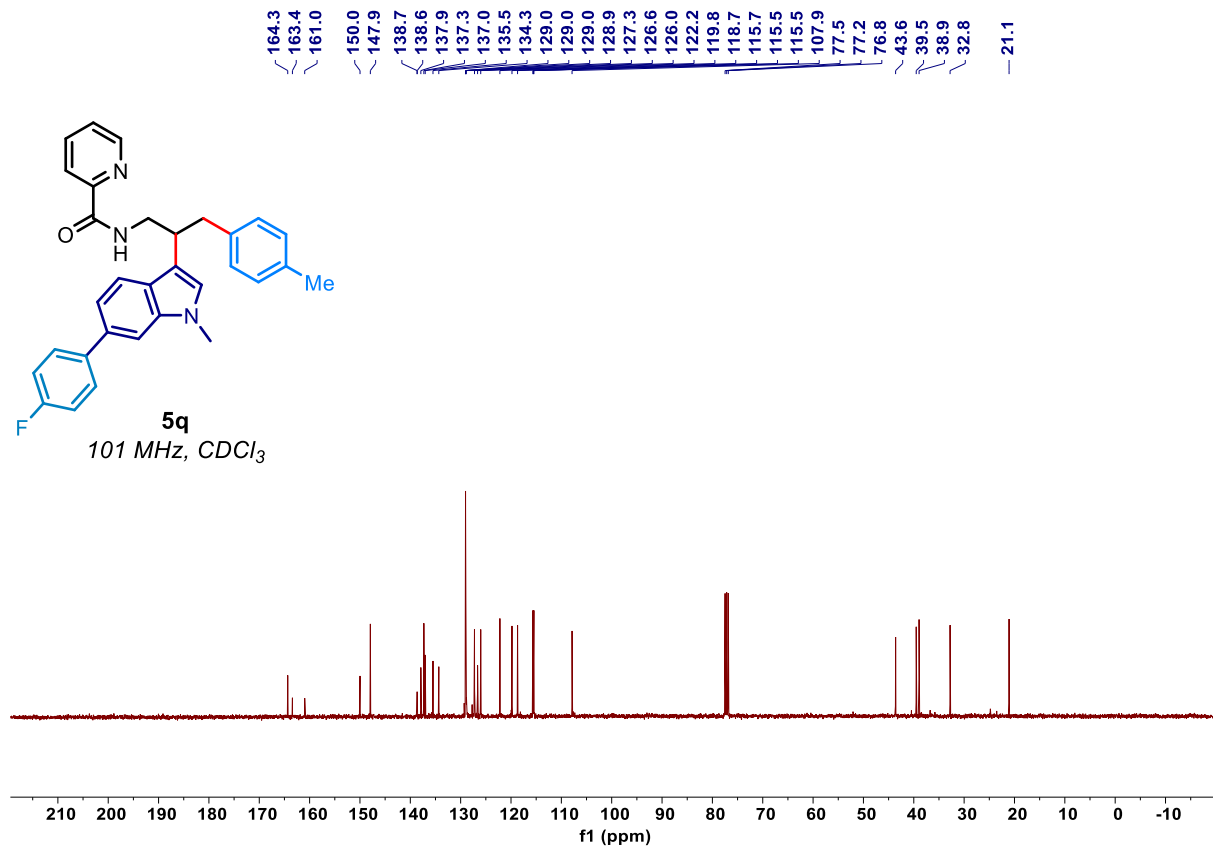

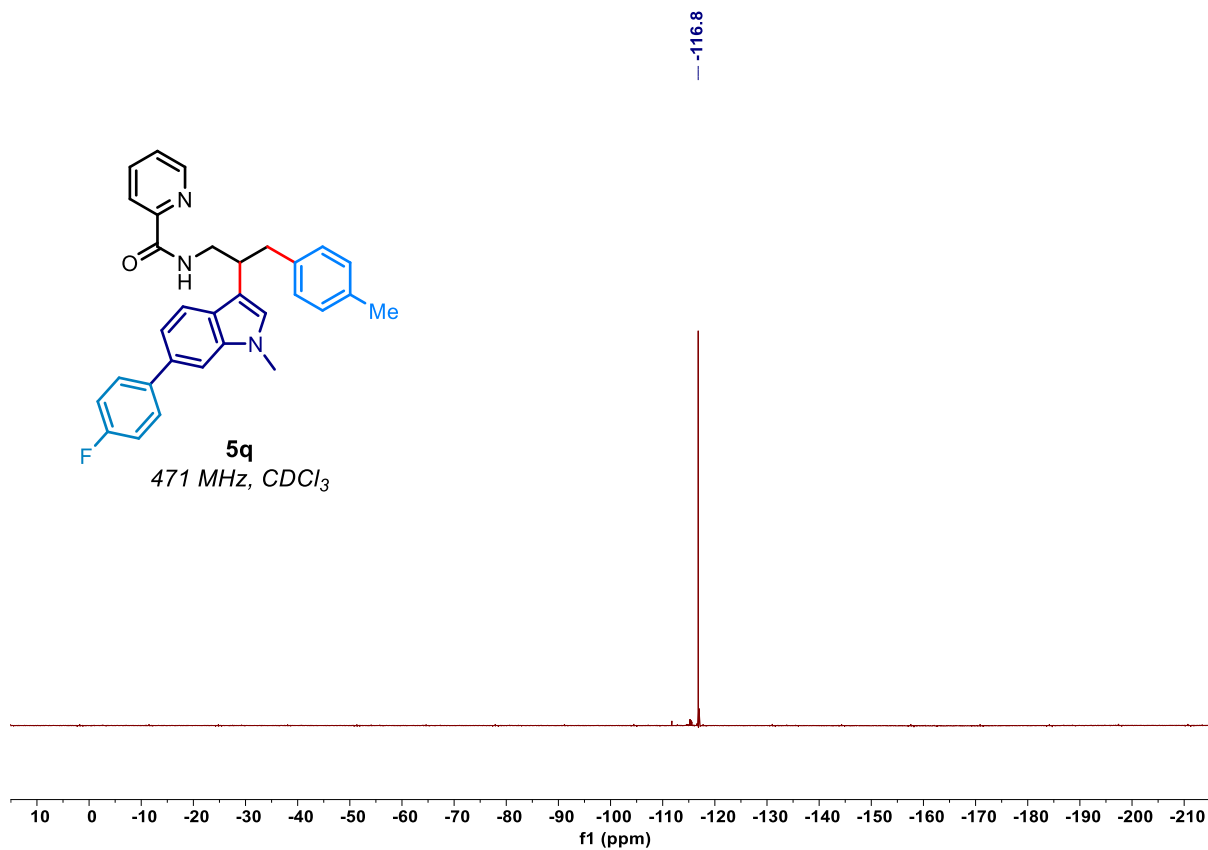

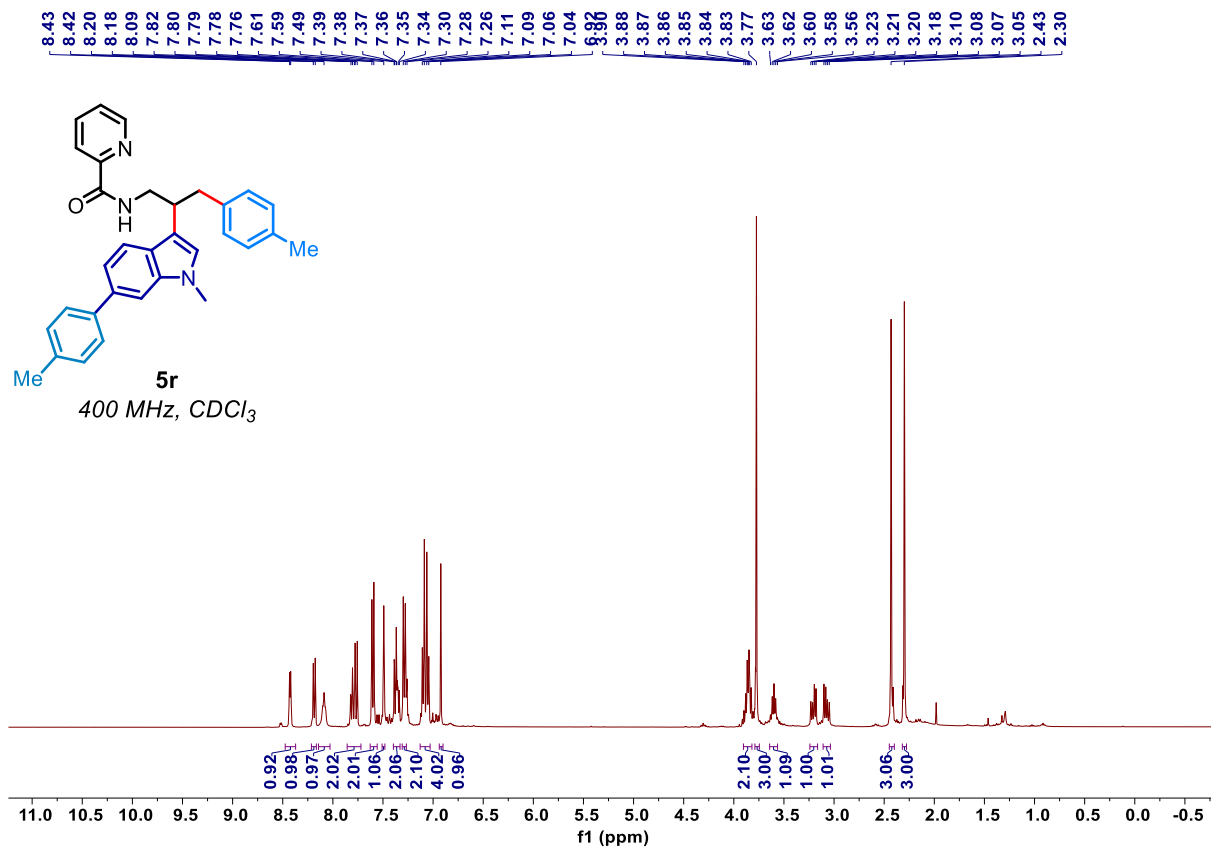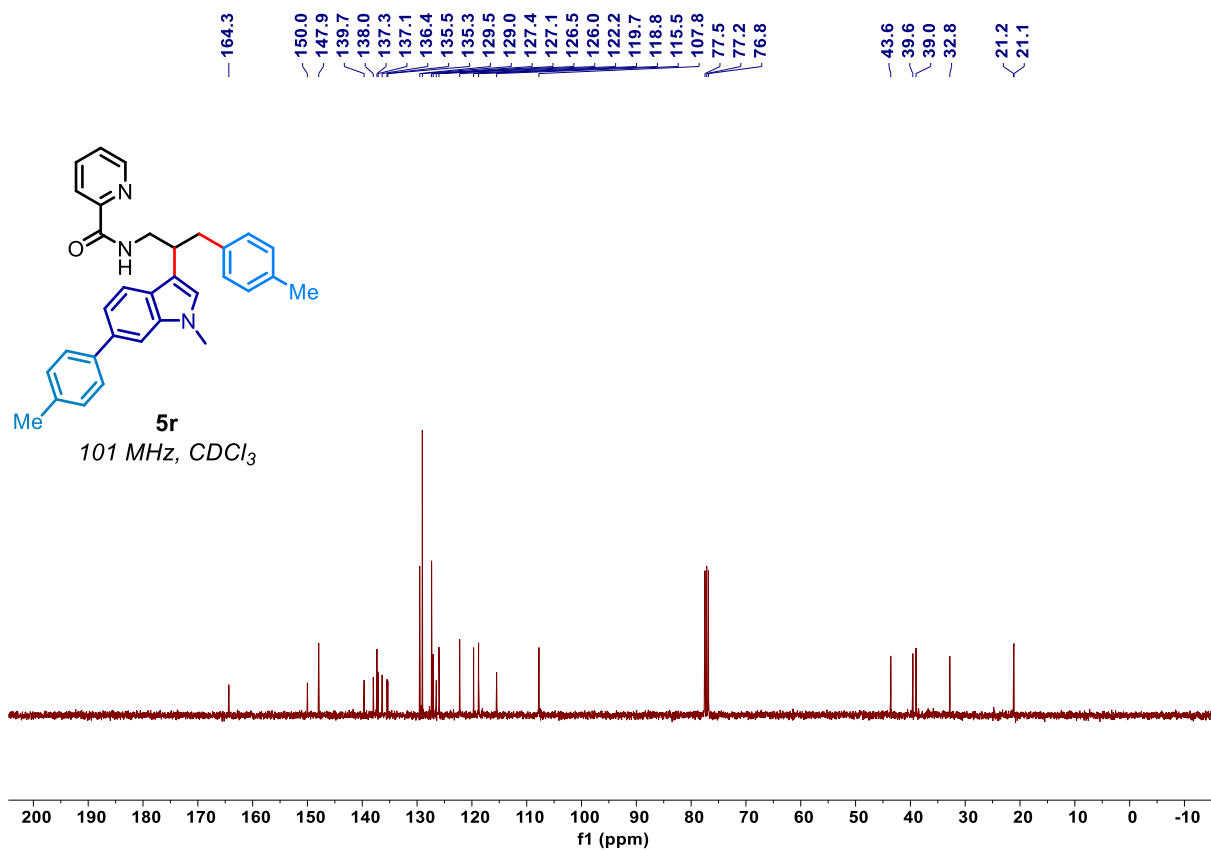

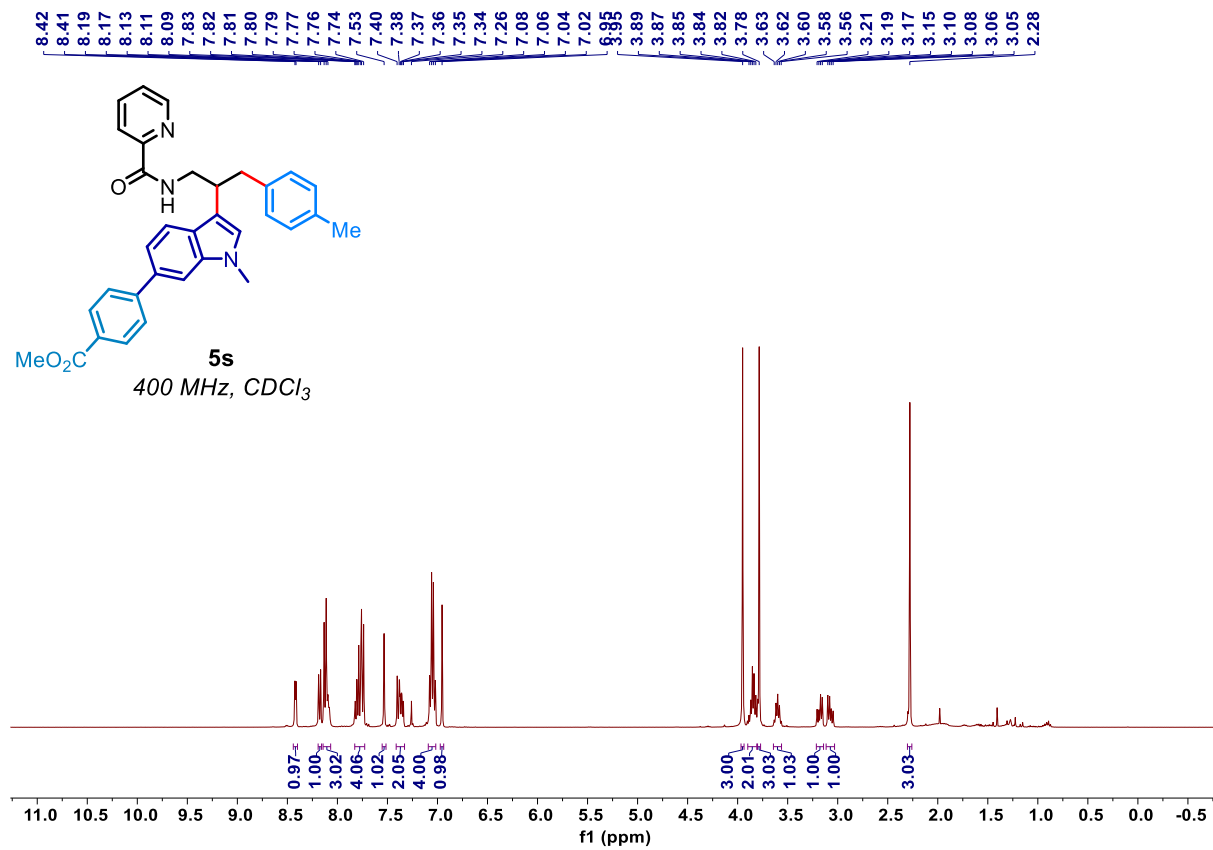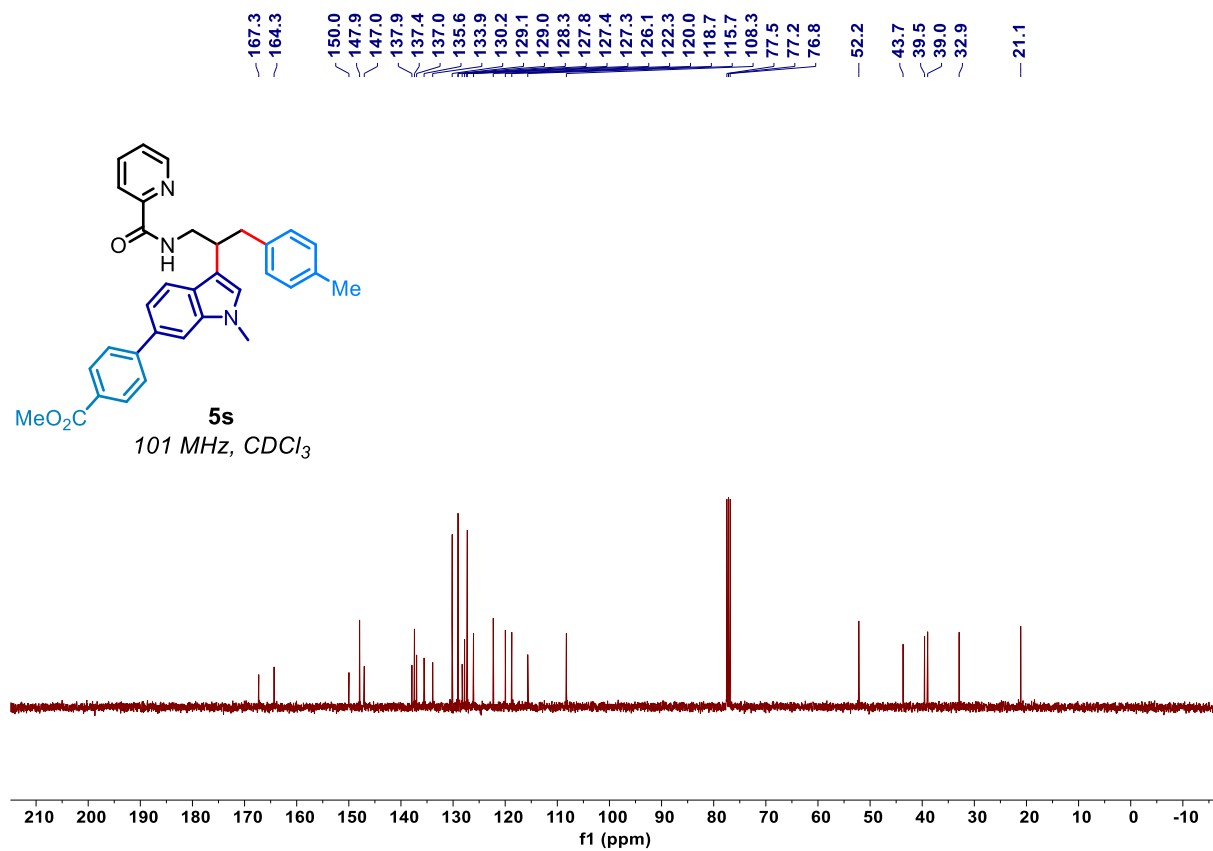

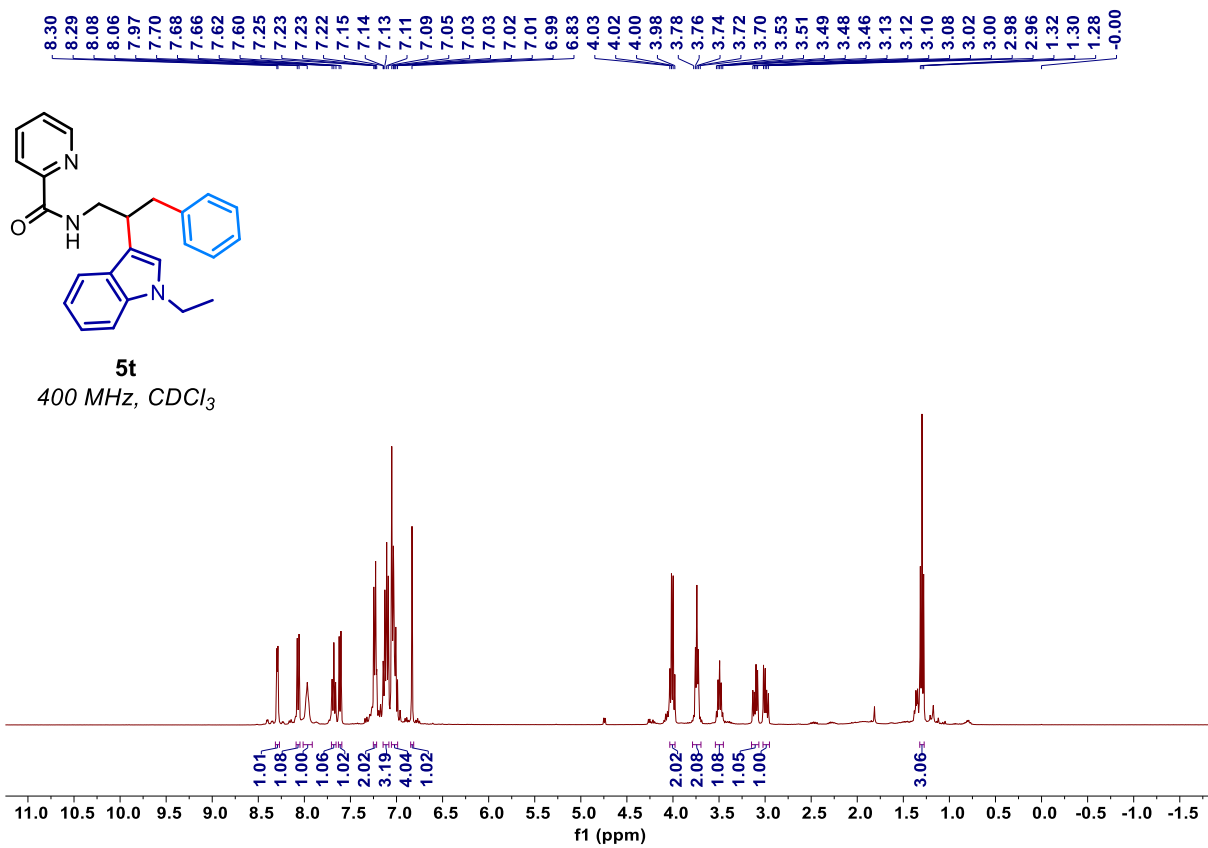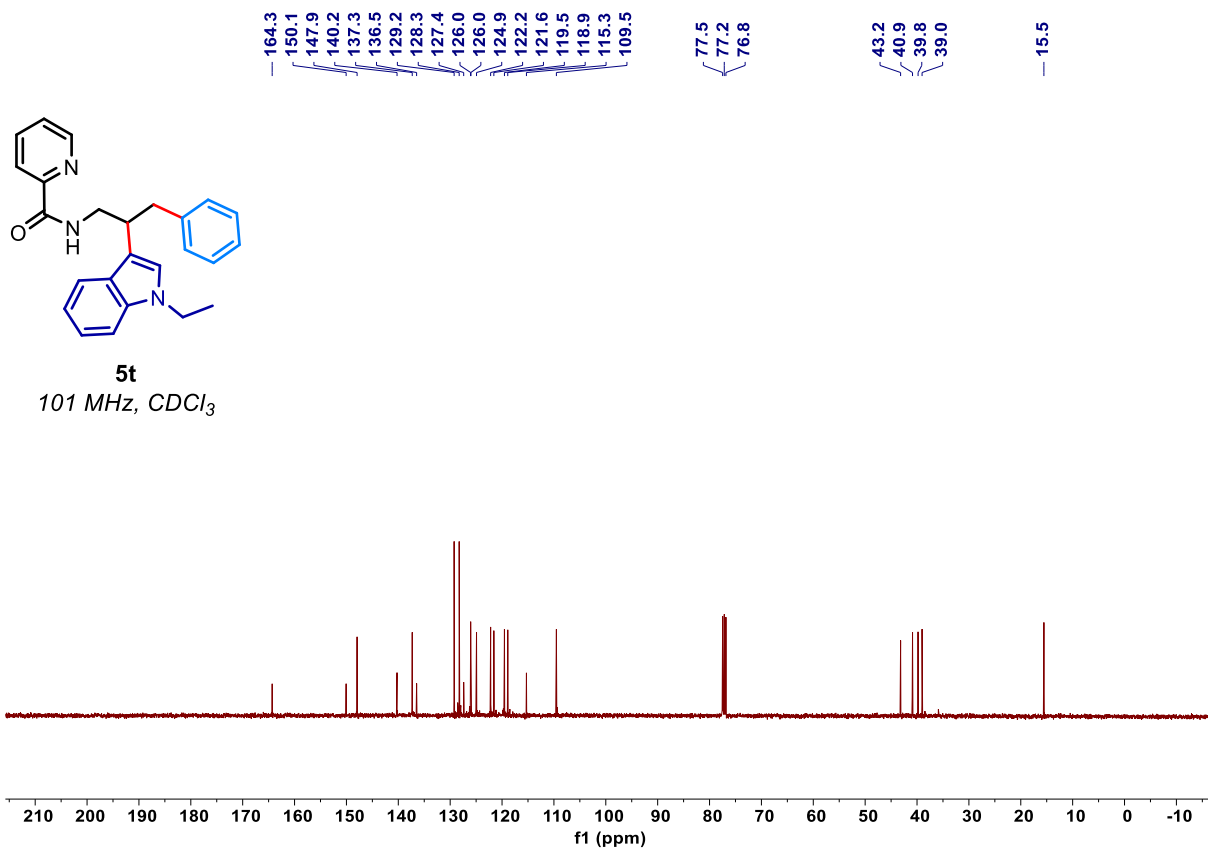

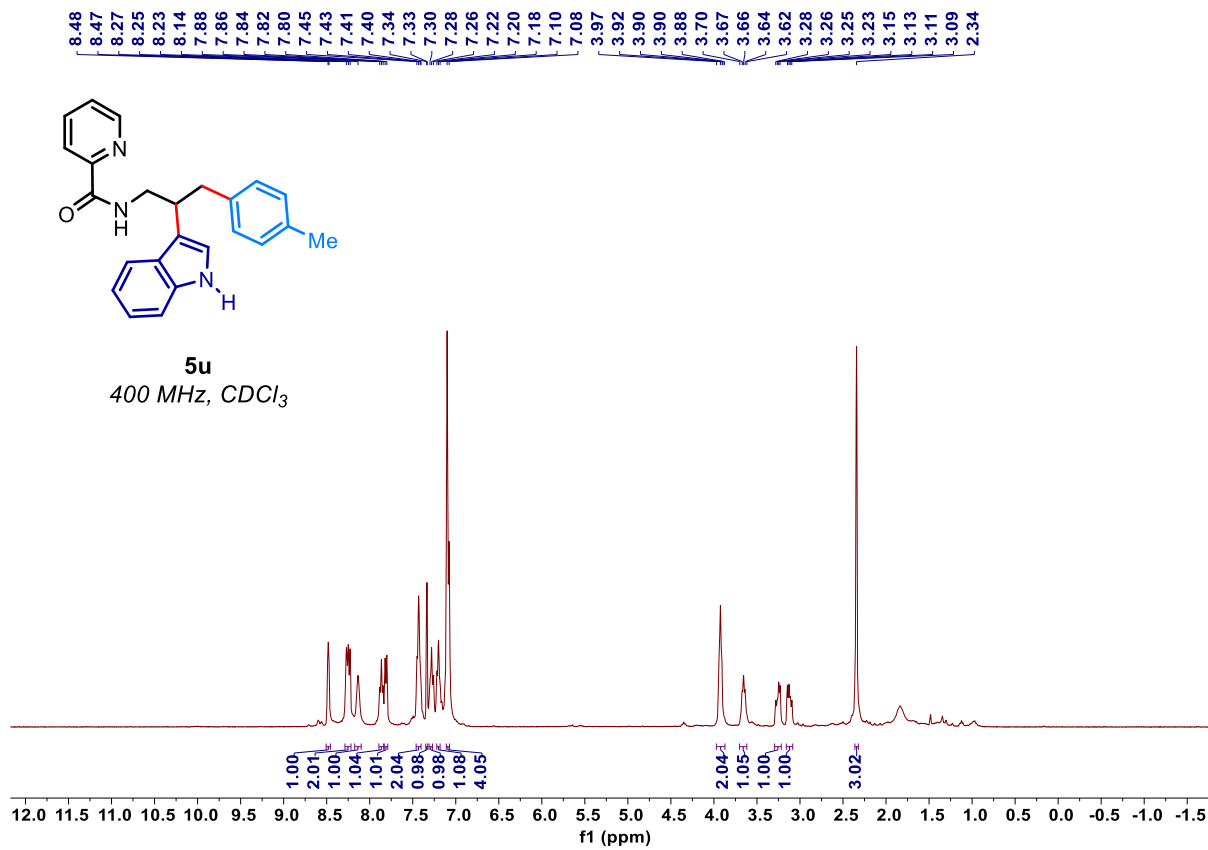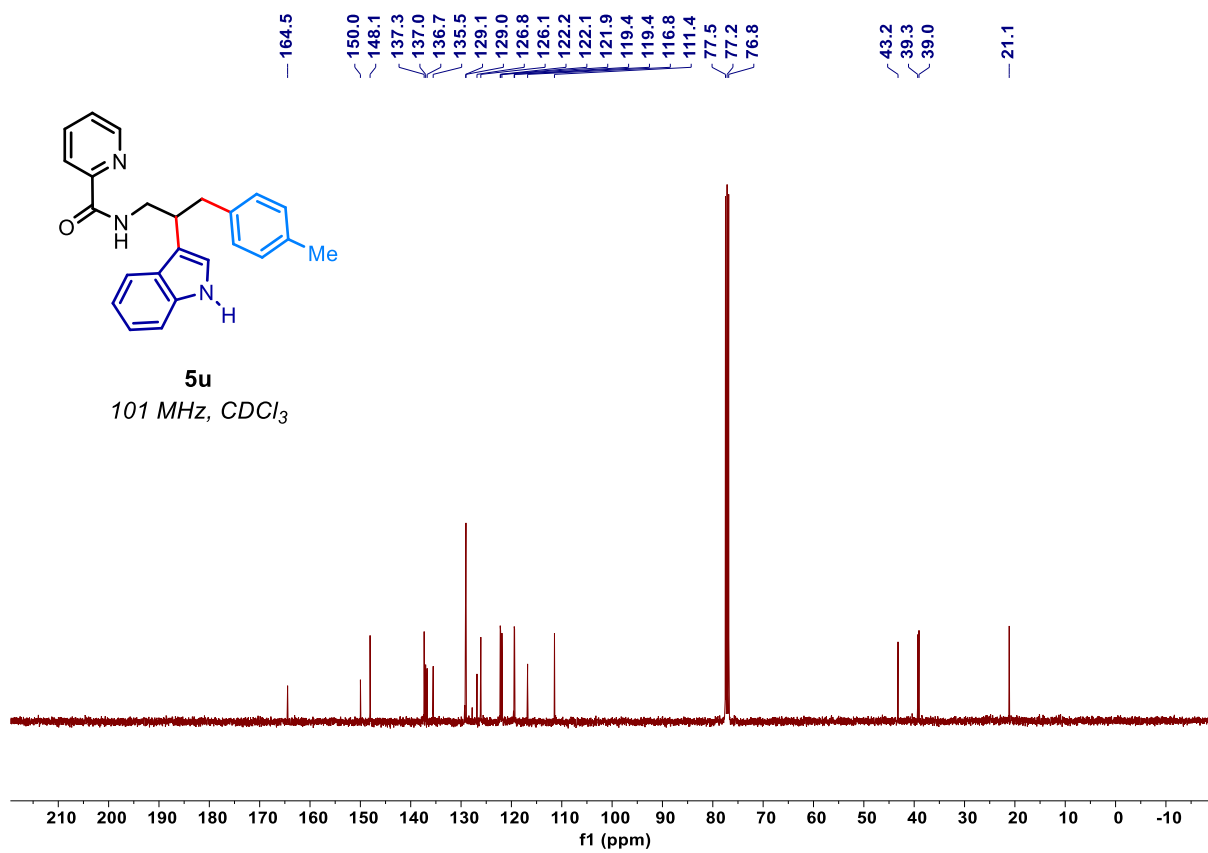



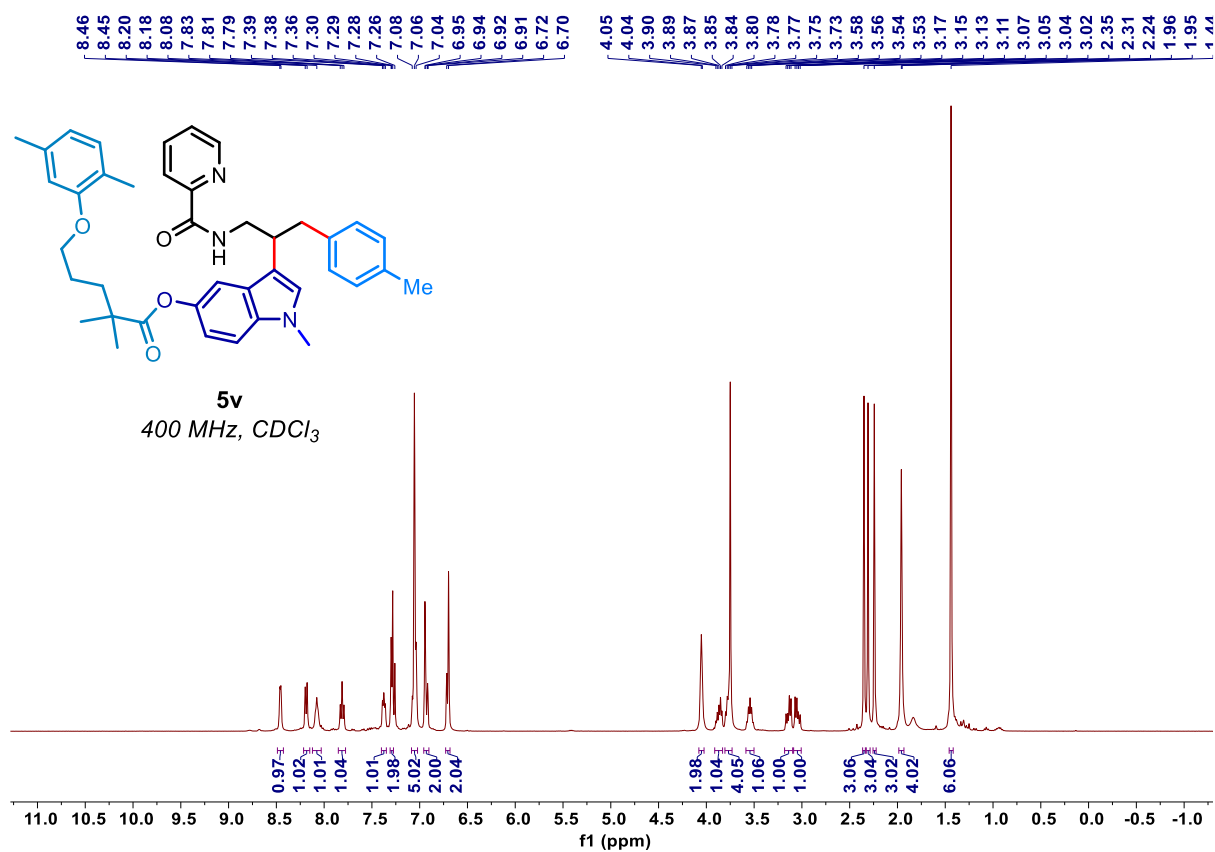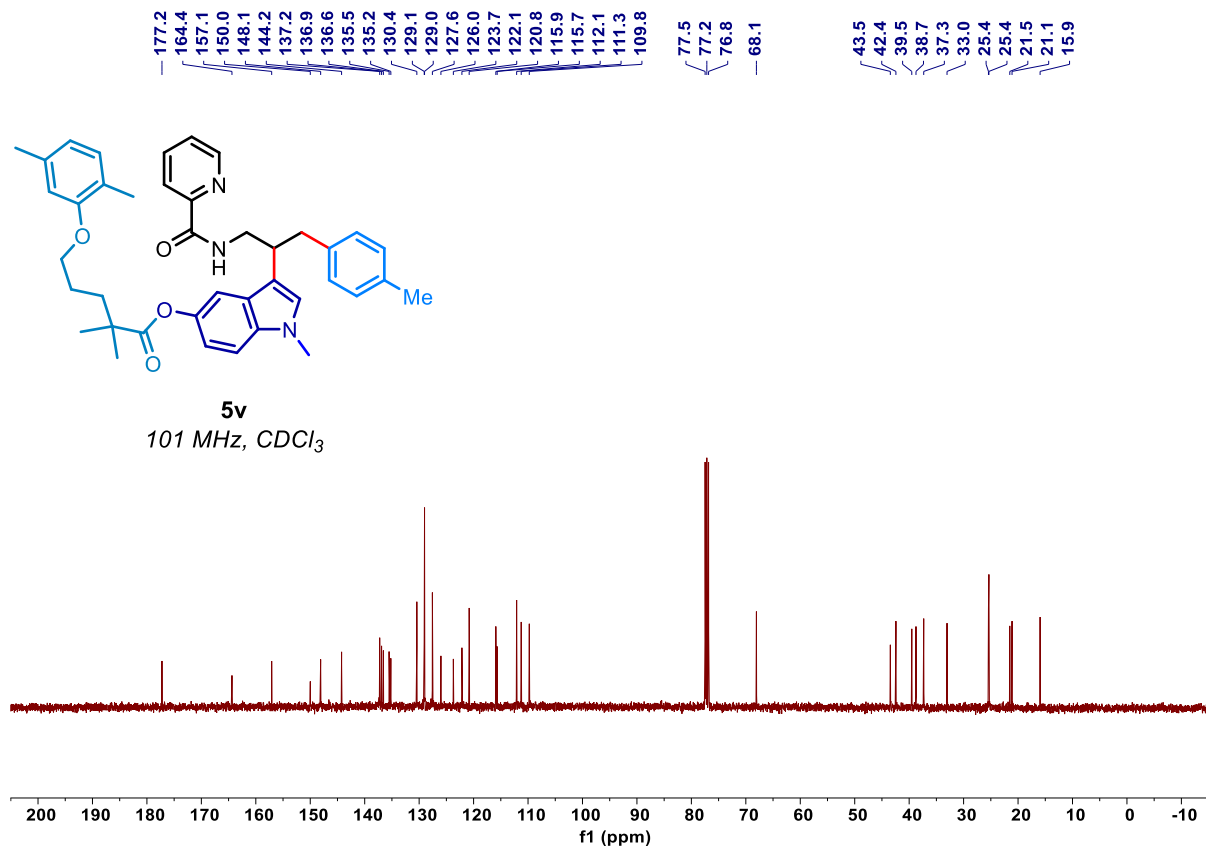

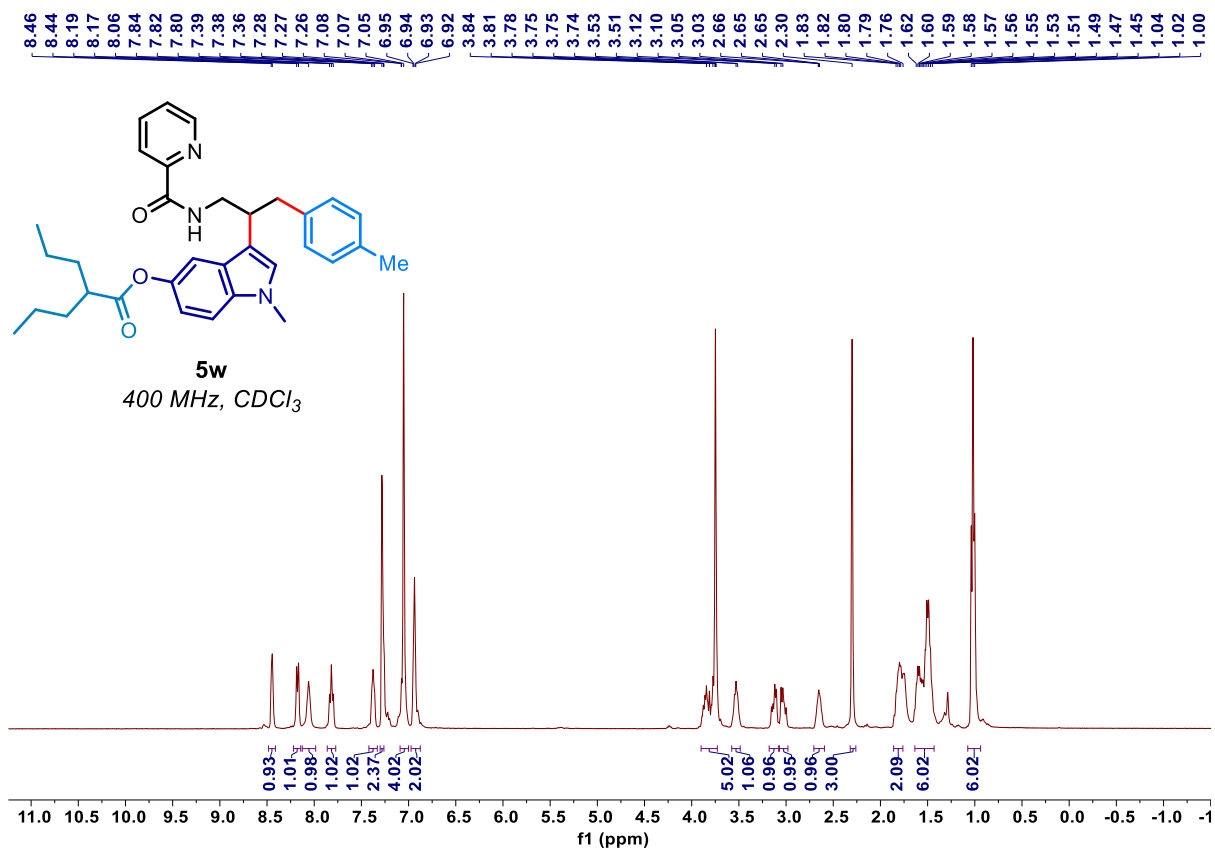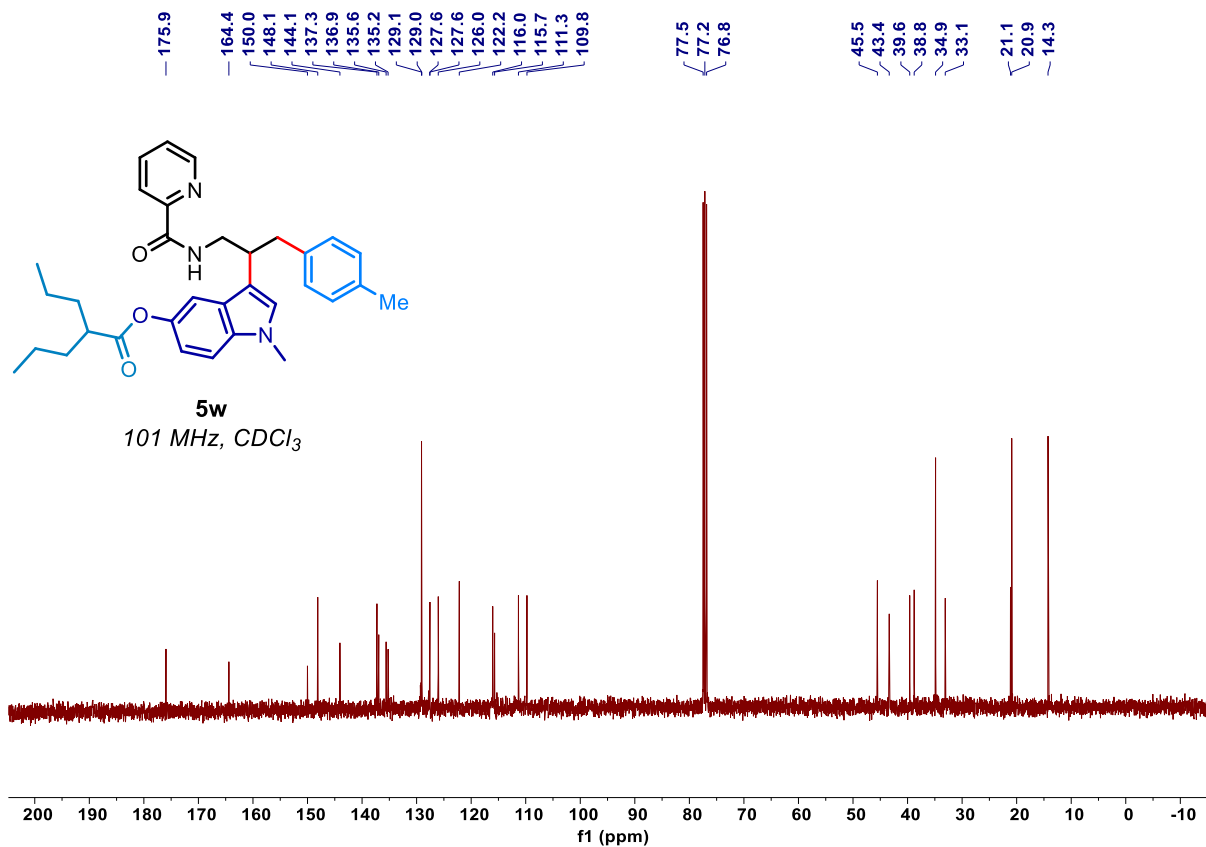

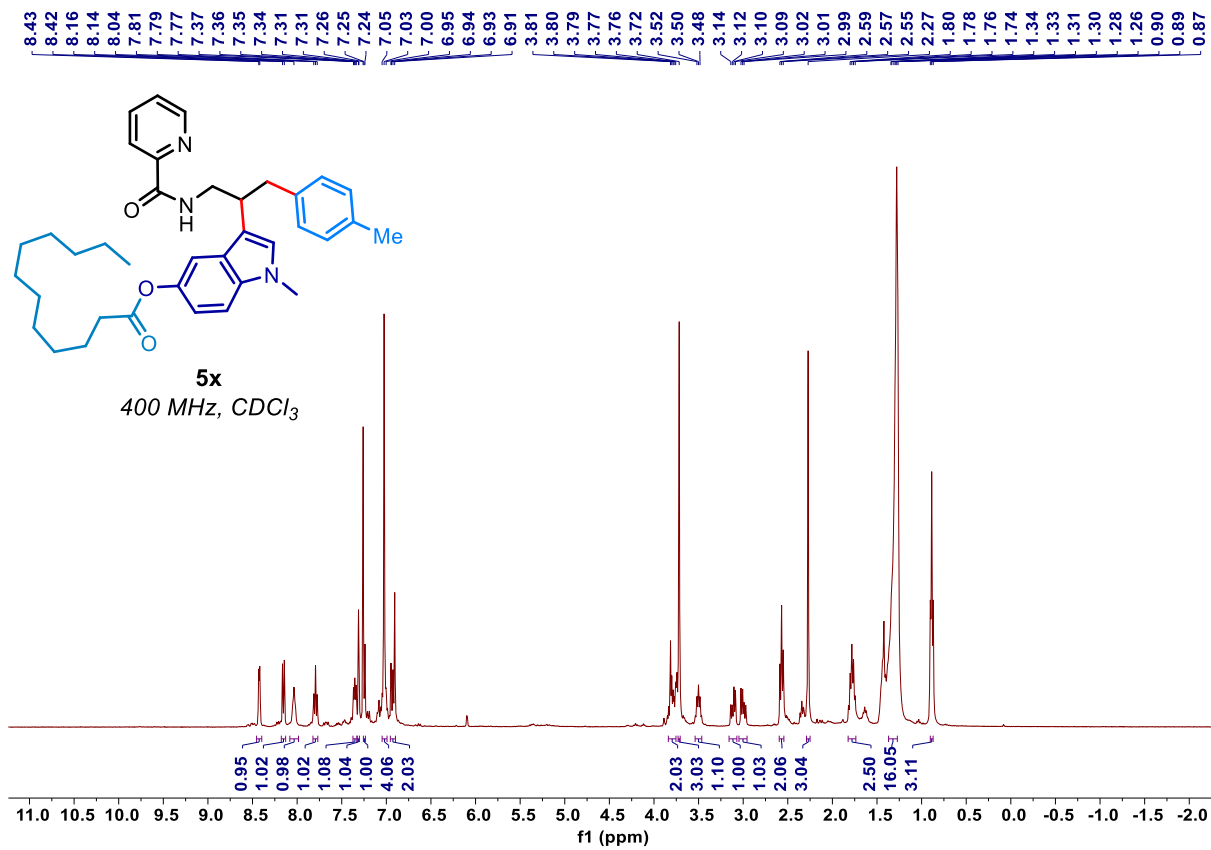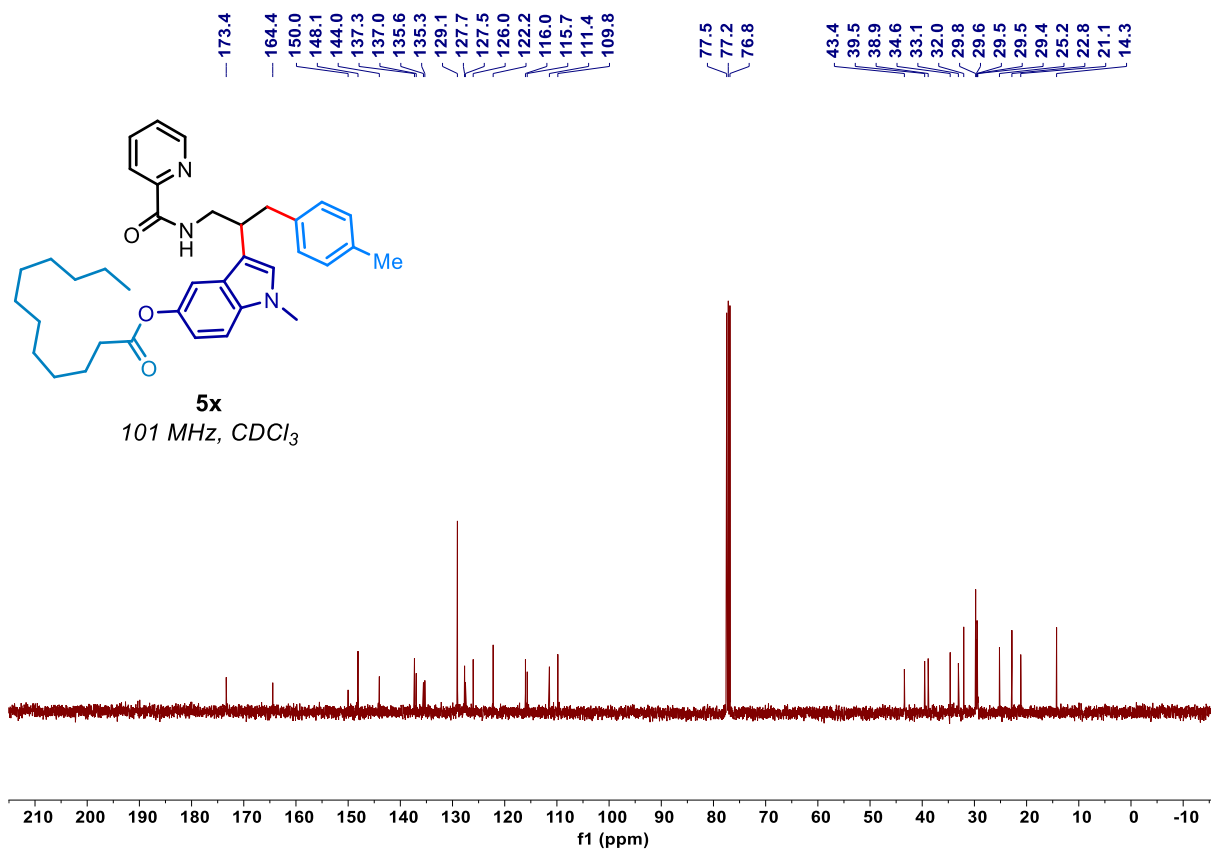

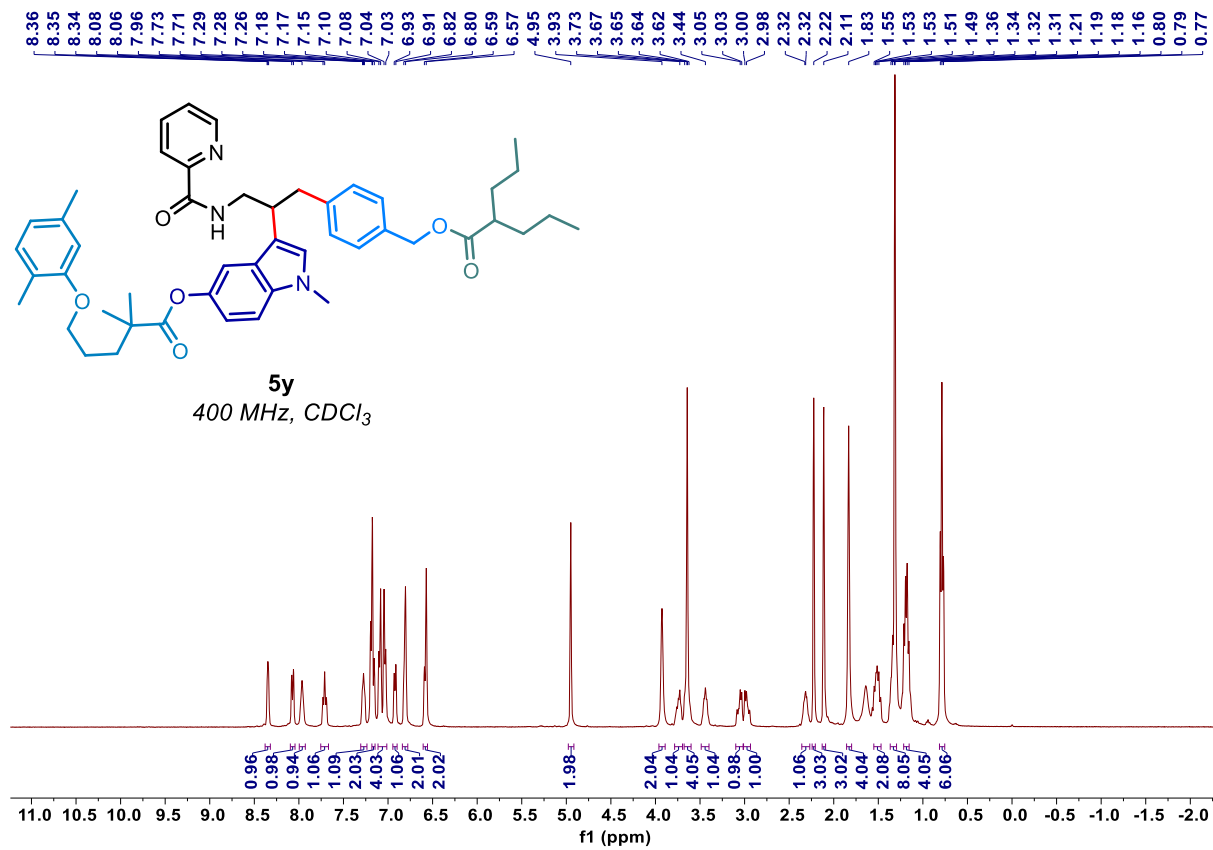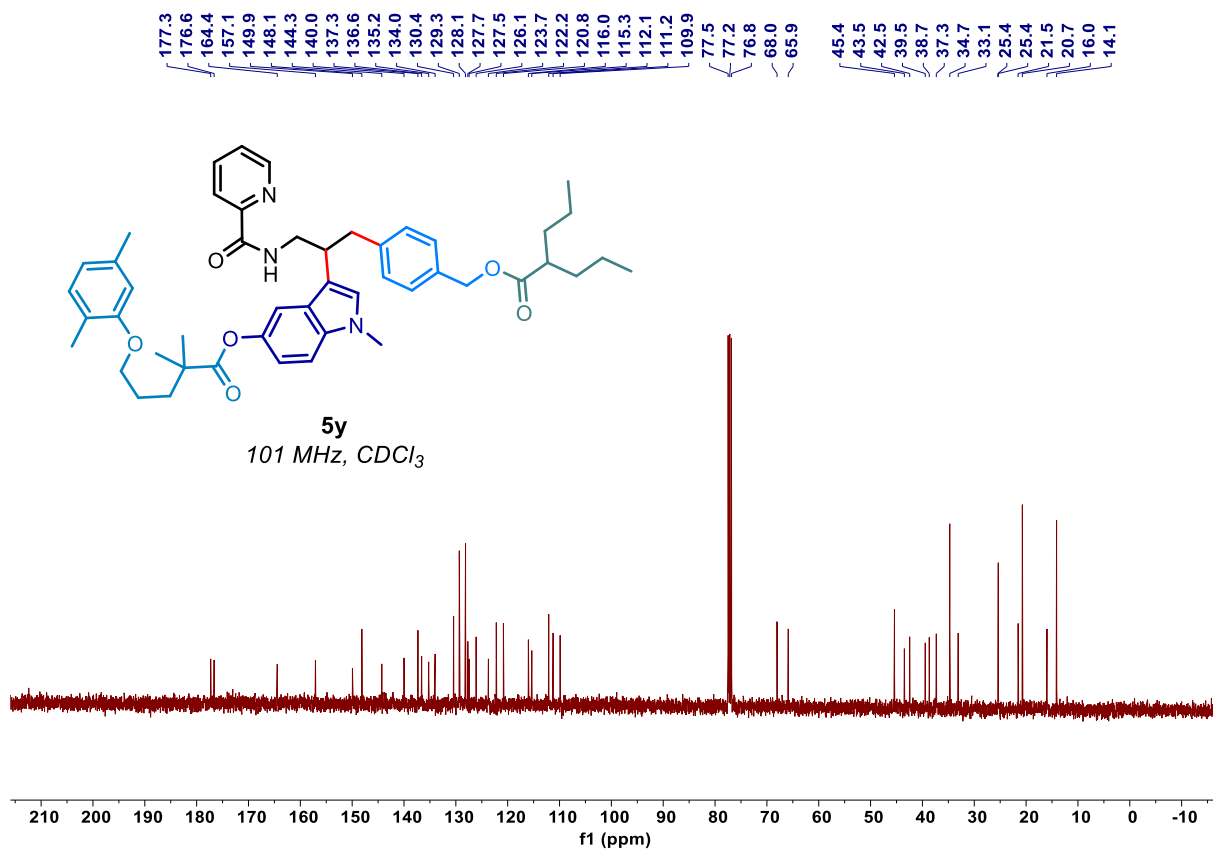

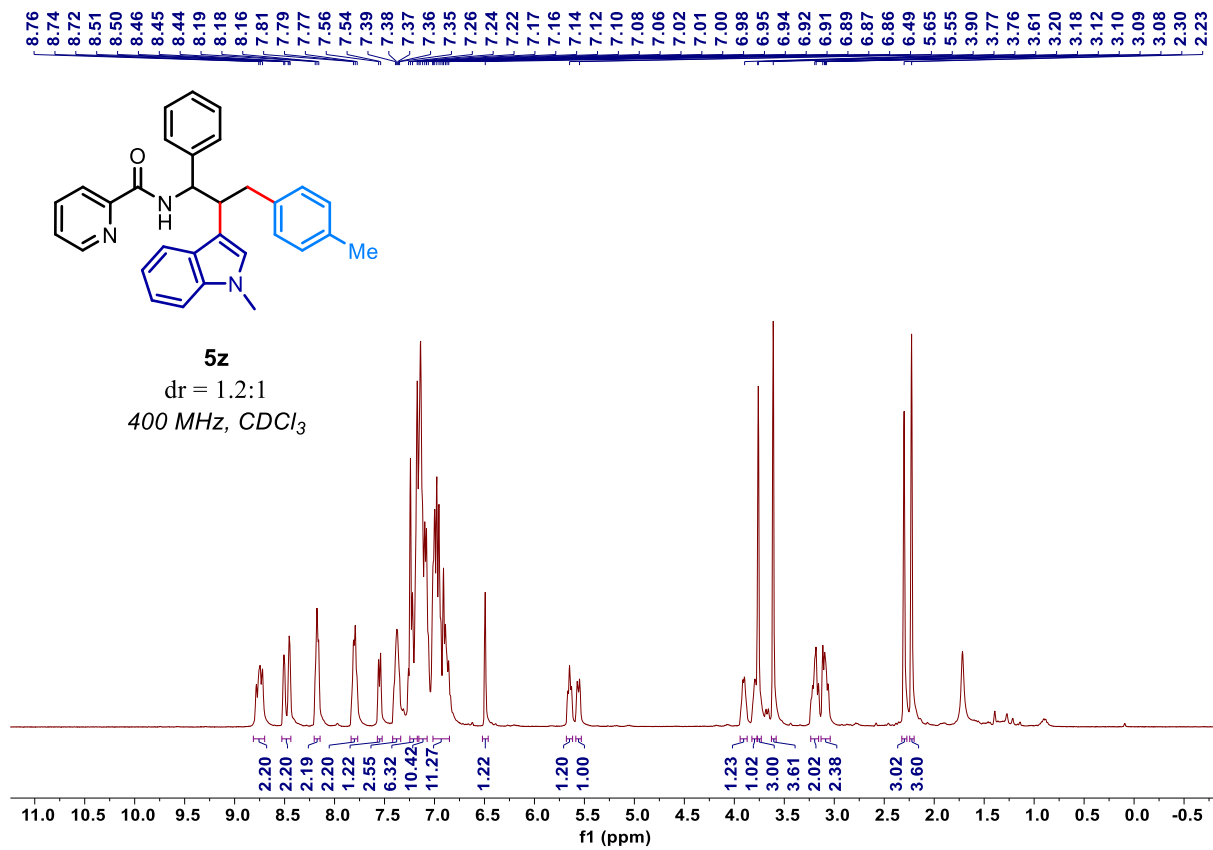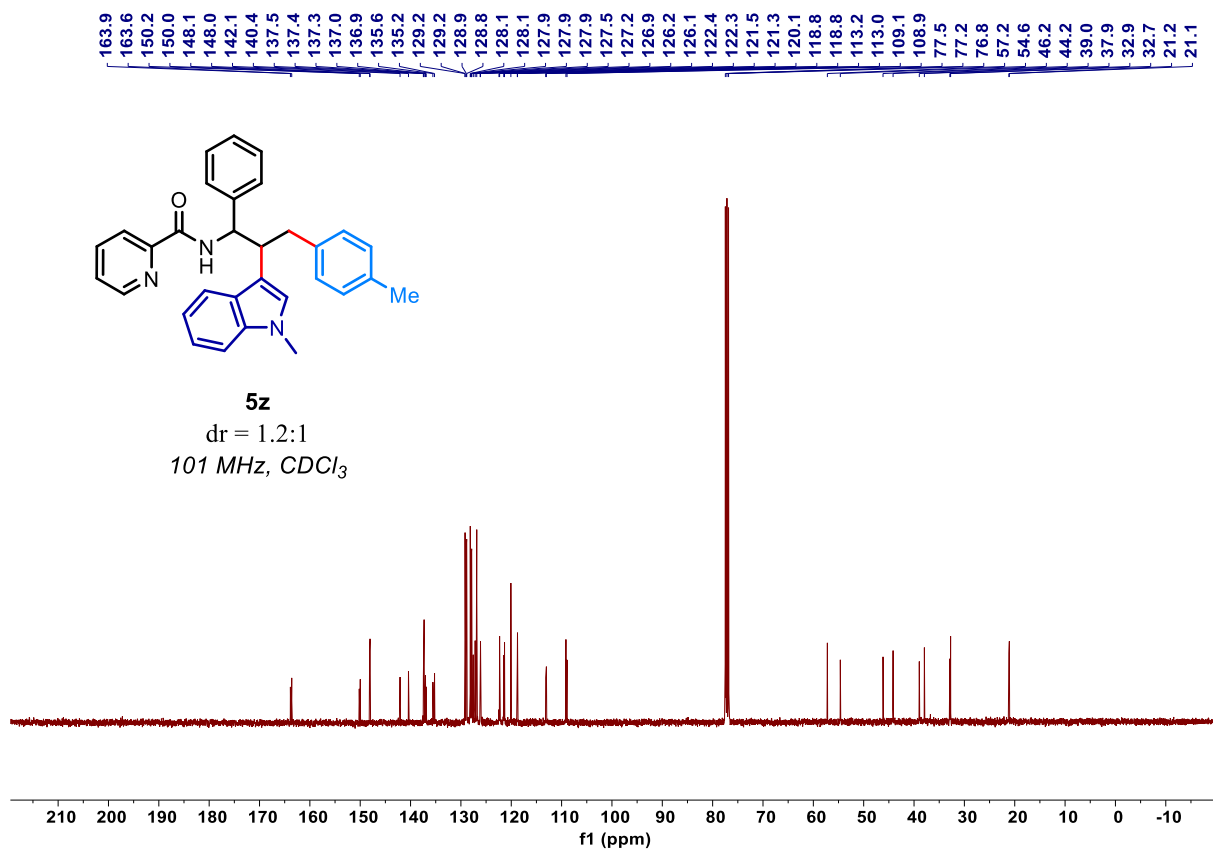

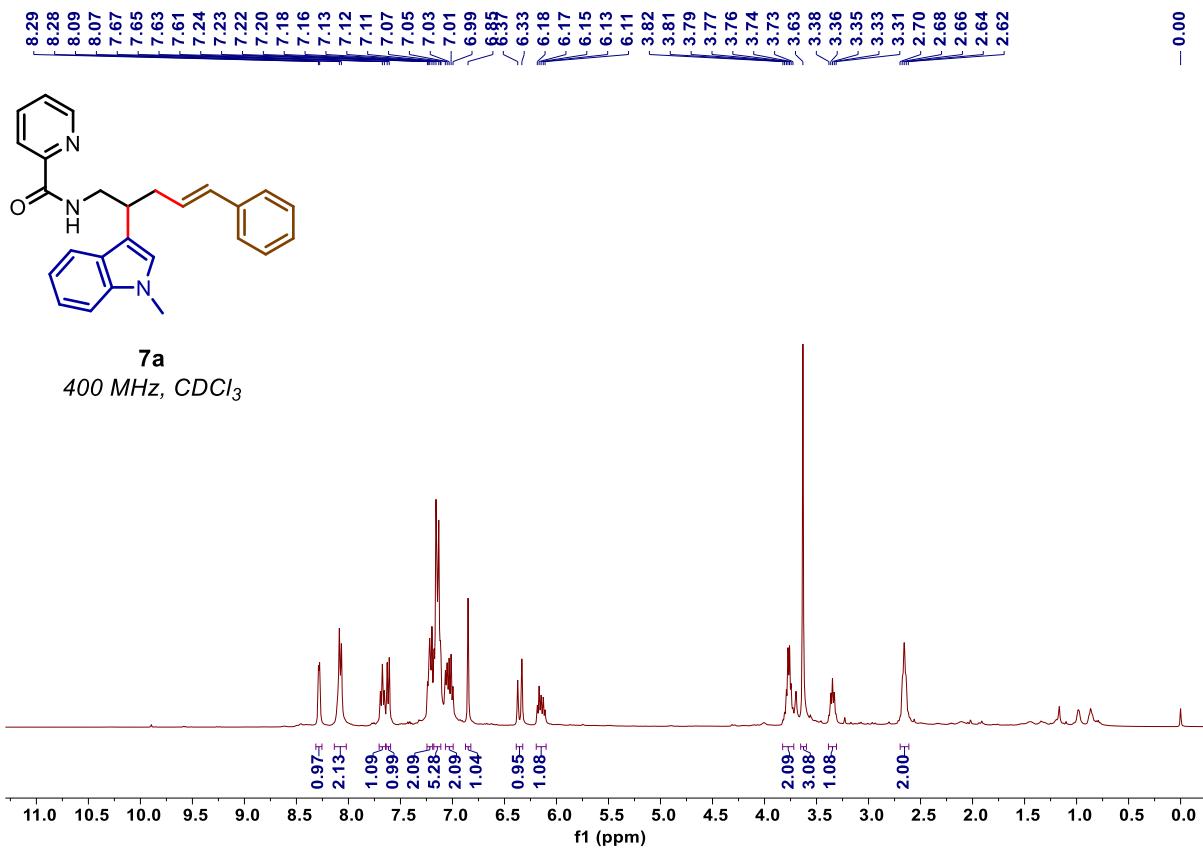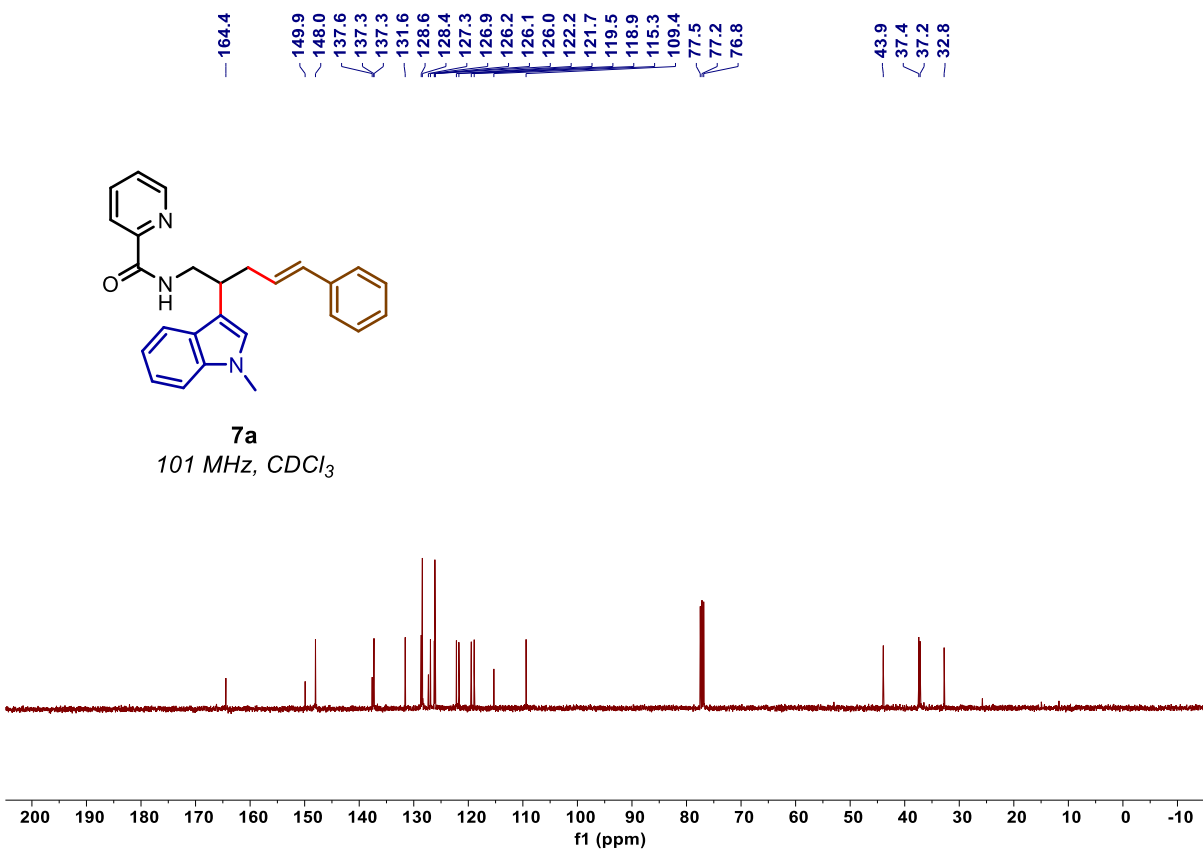

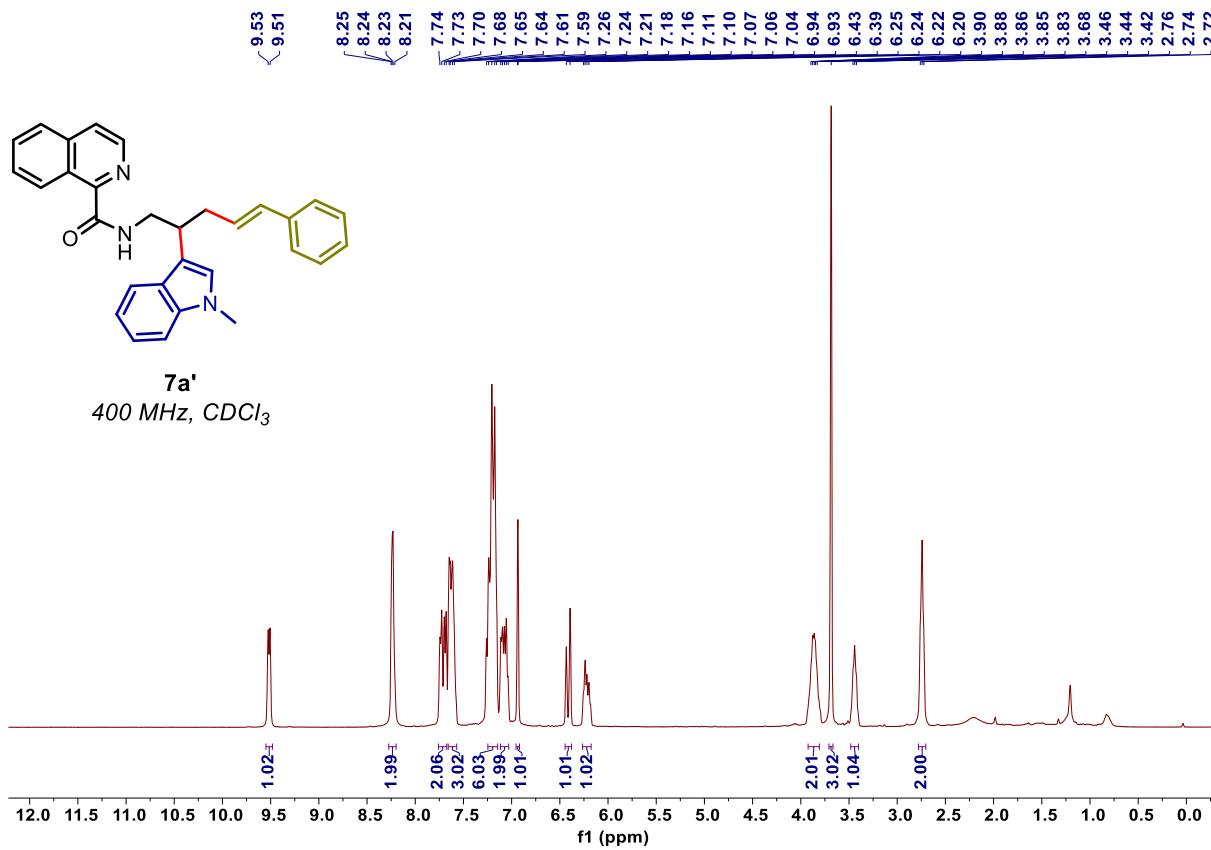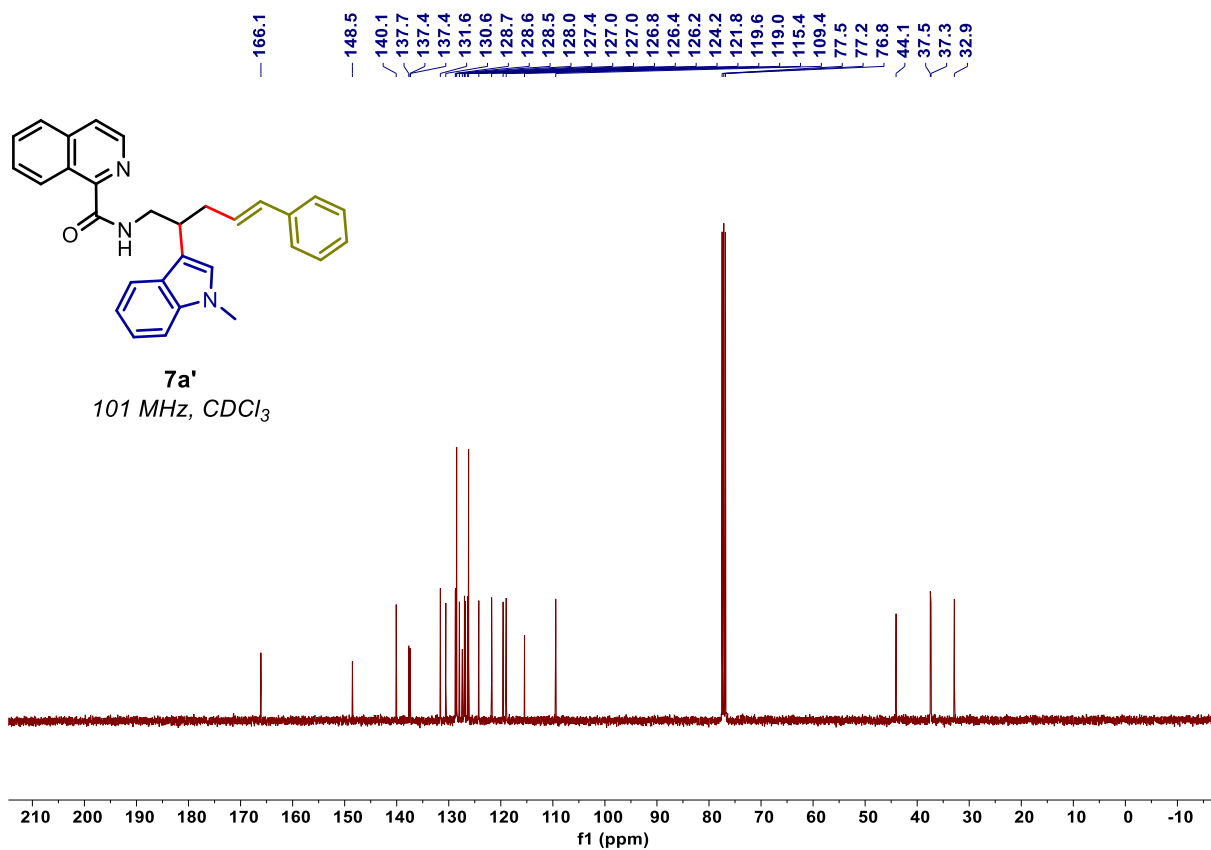

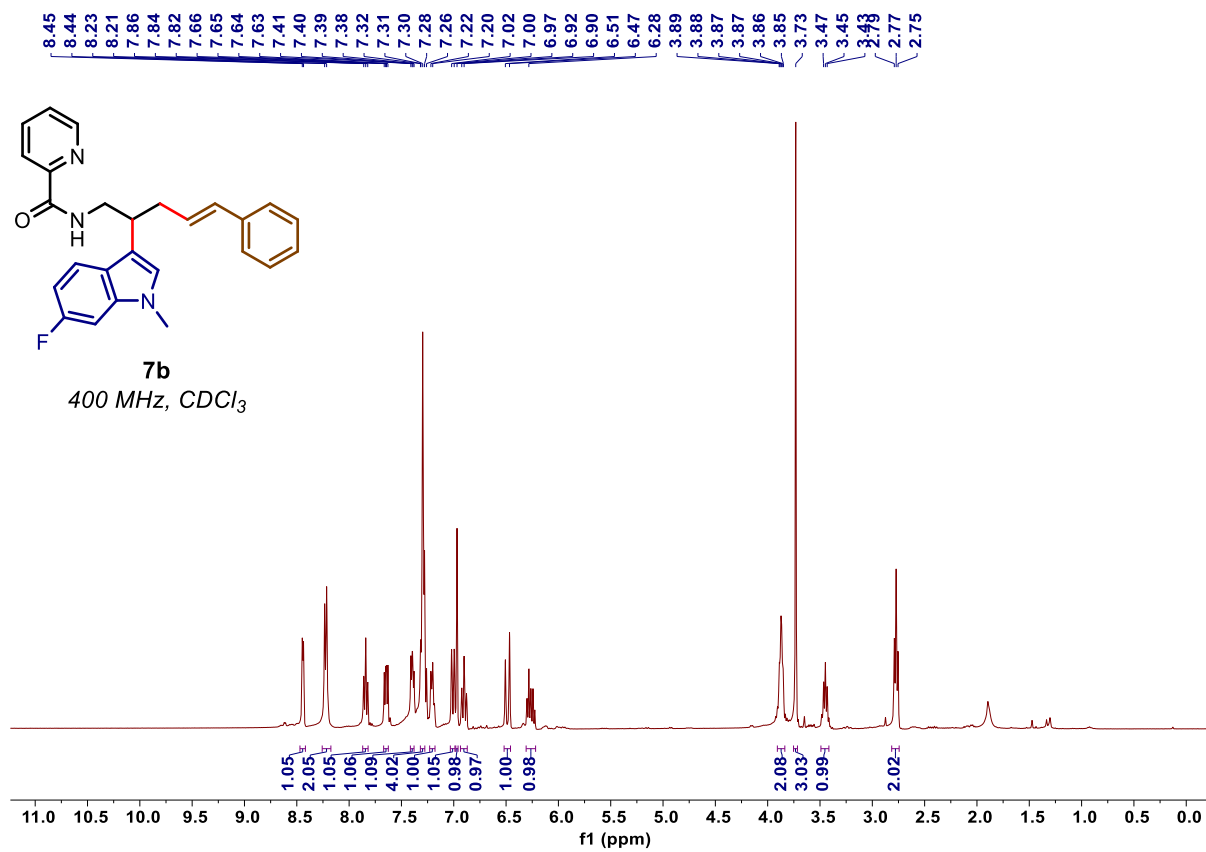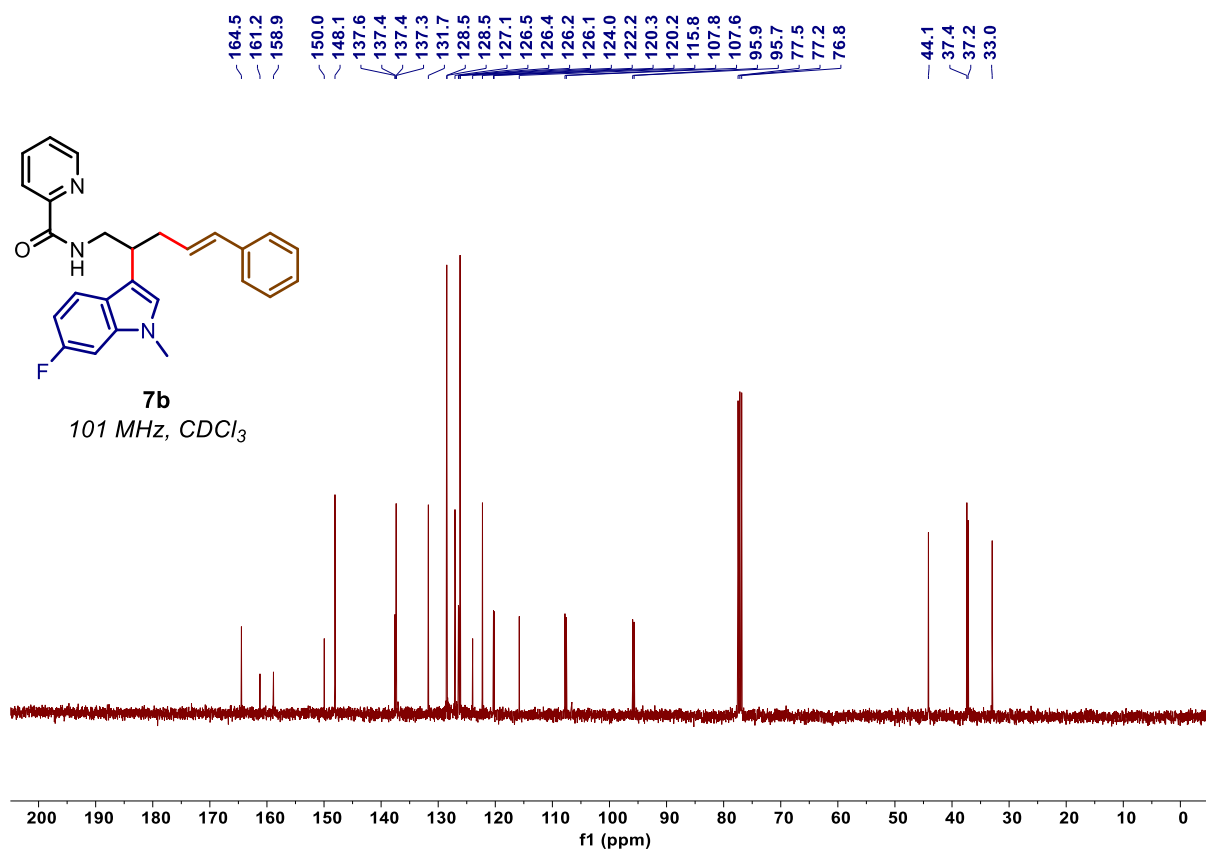



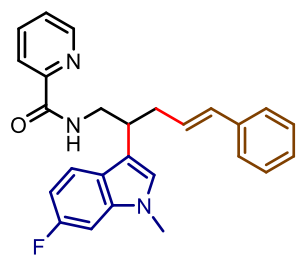

**7b**  
471 MHz, CDCl<sub>3</sub>

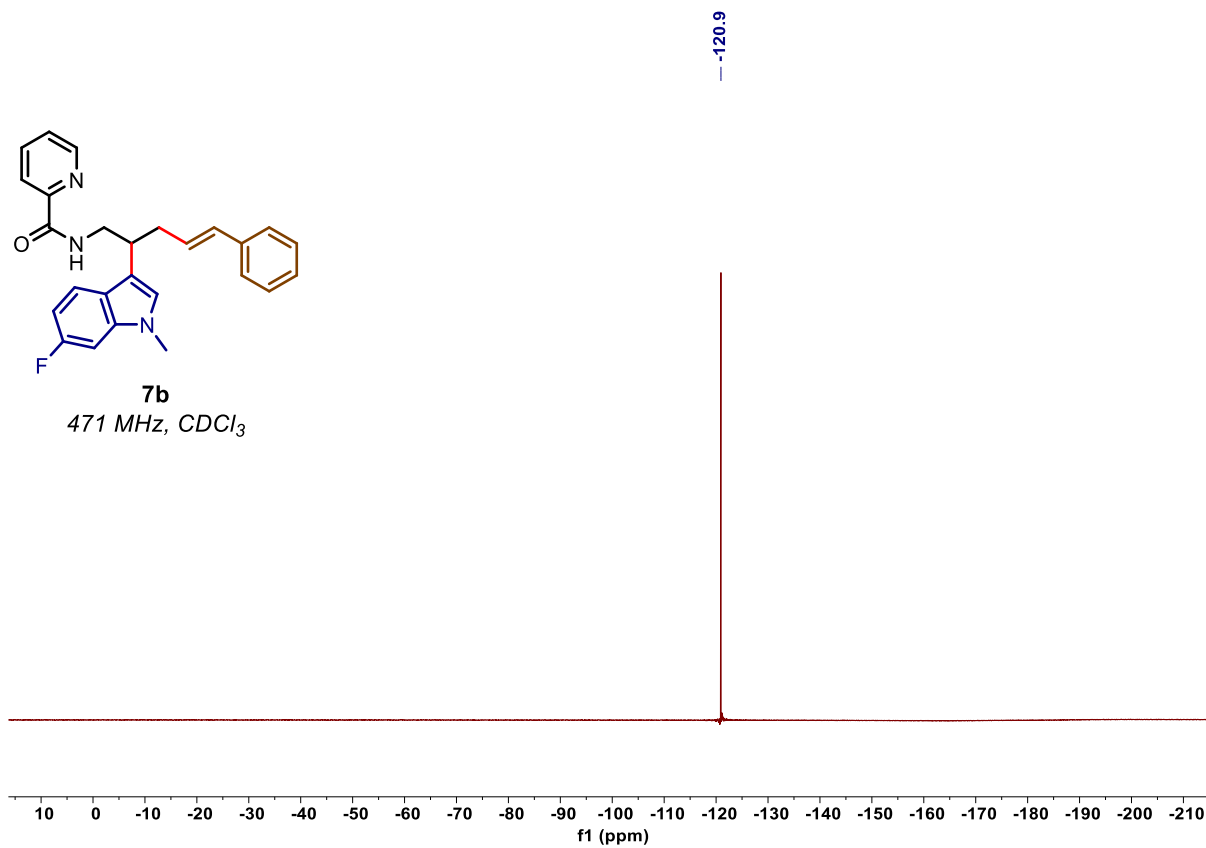

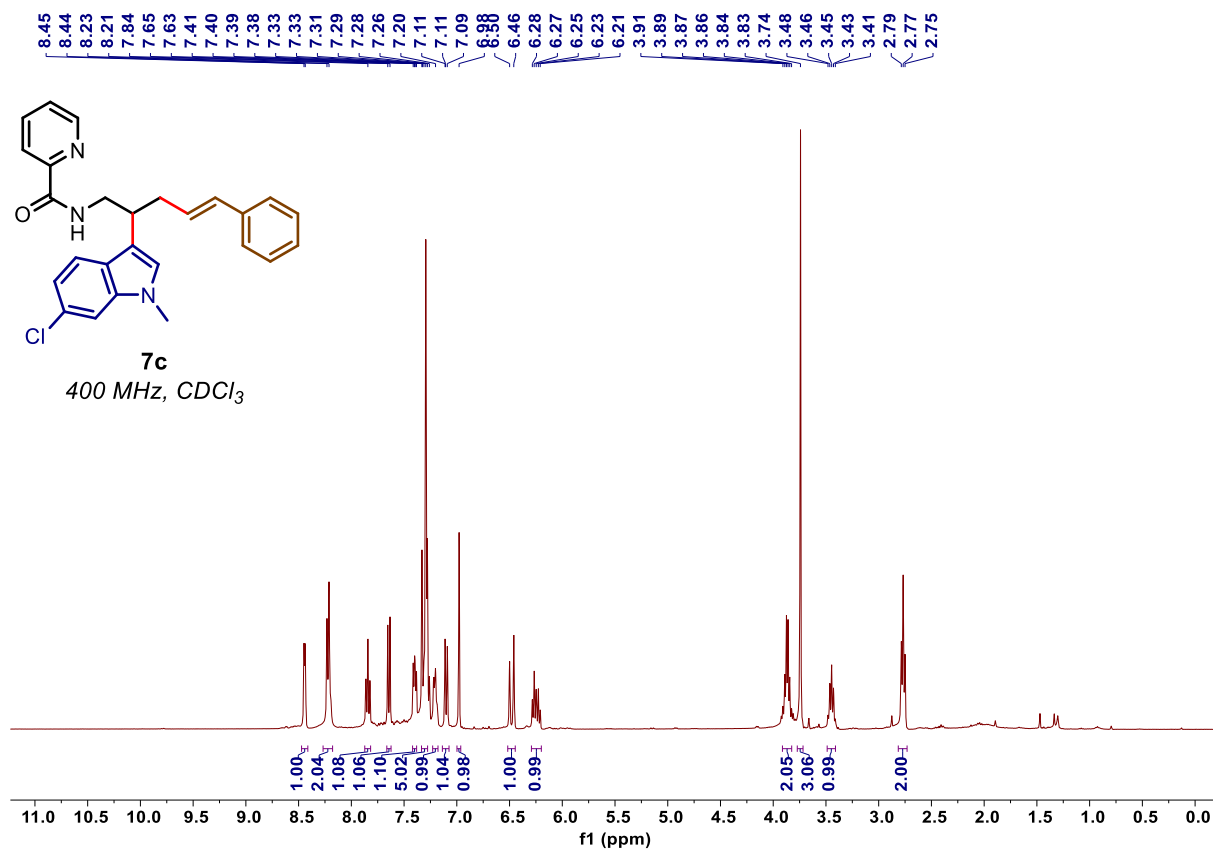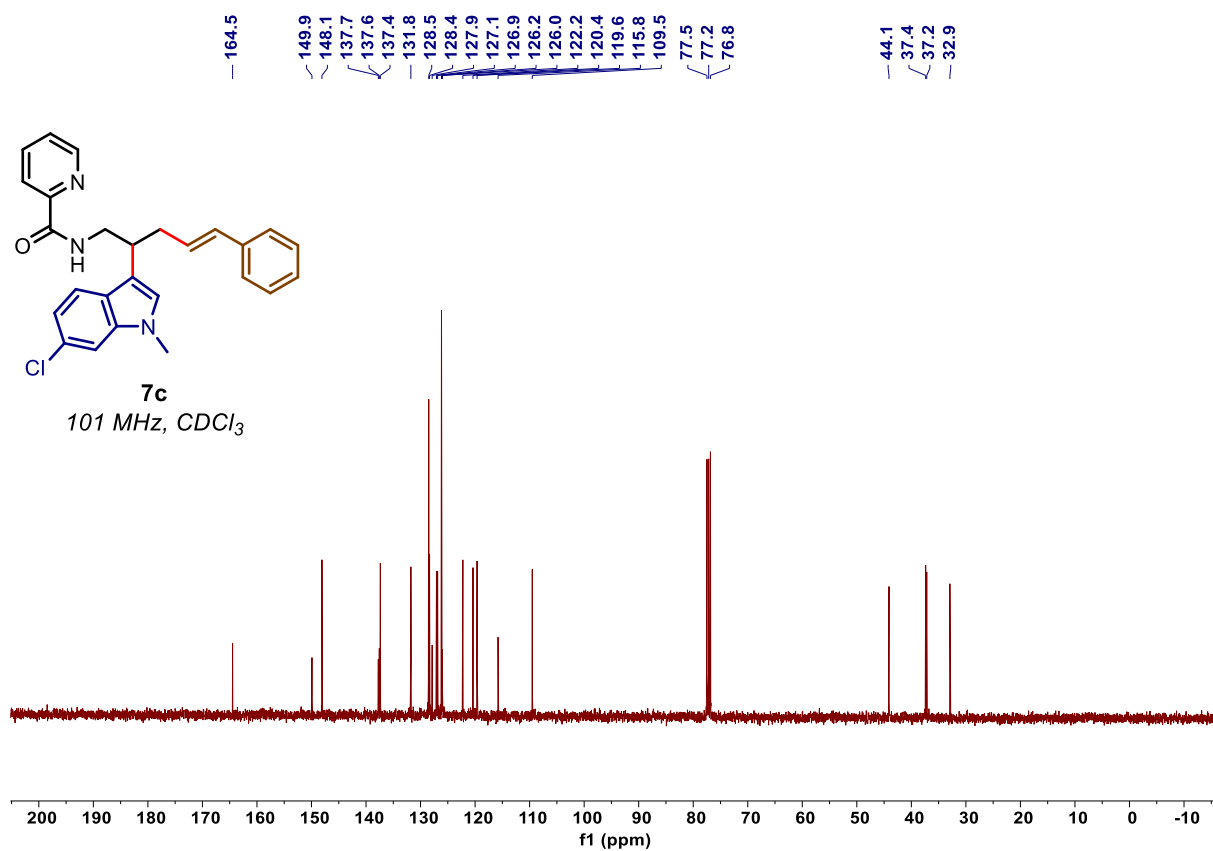

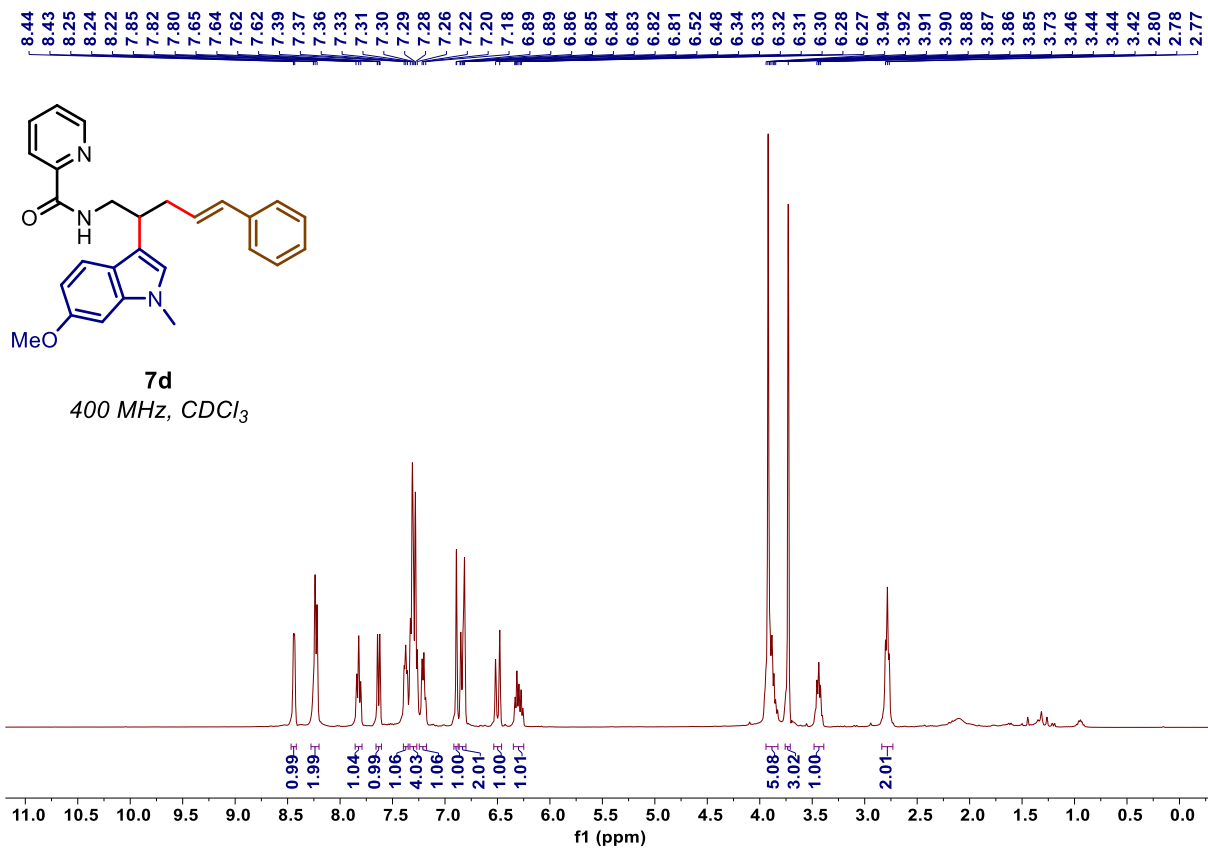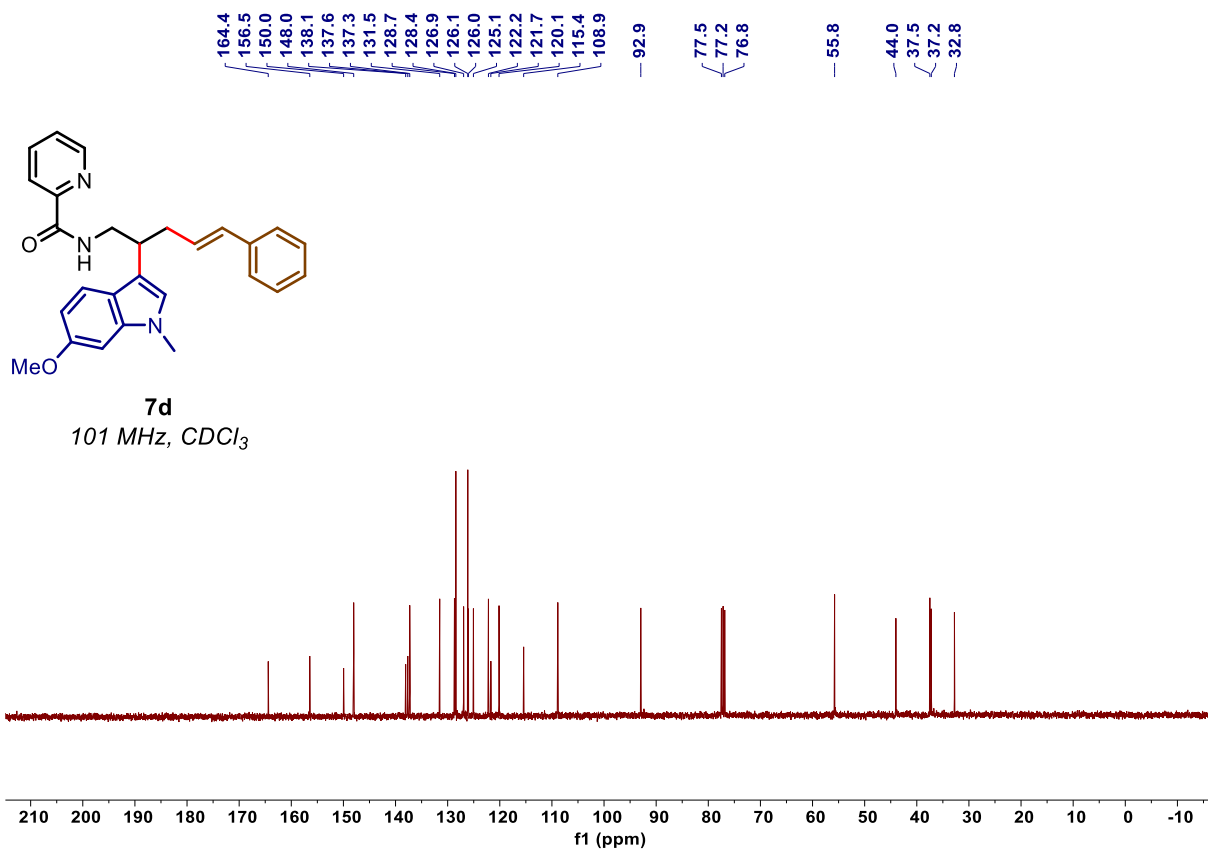

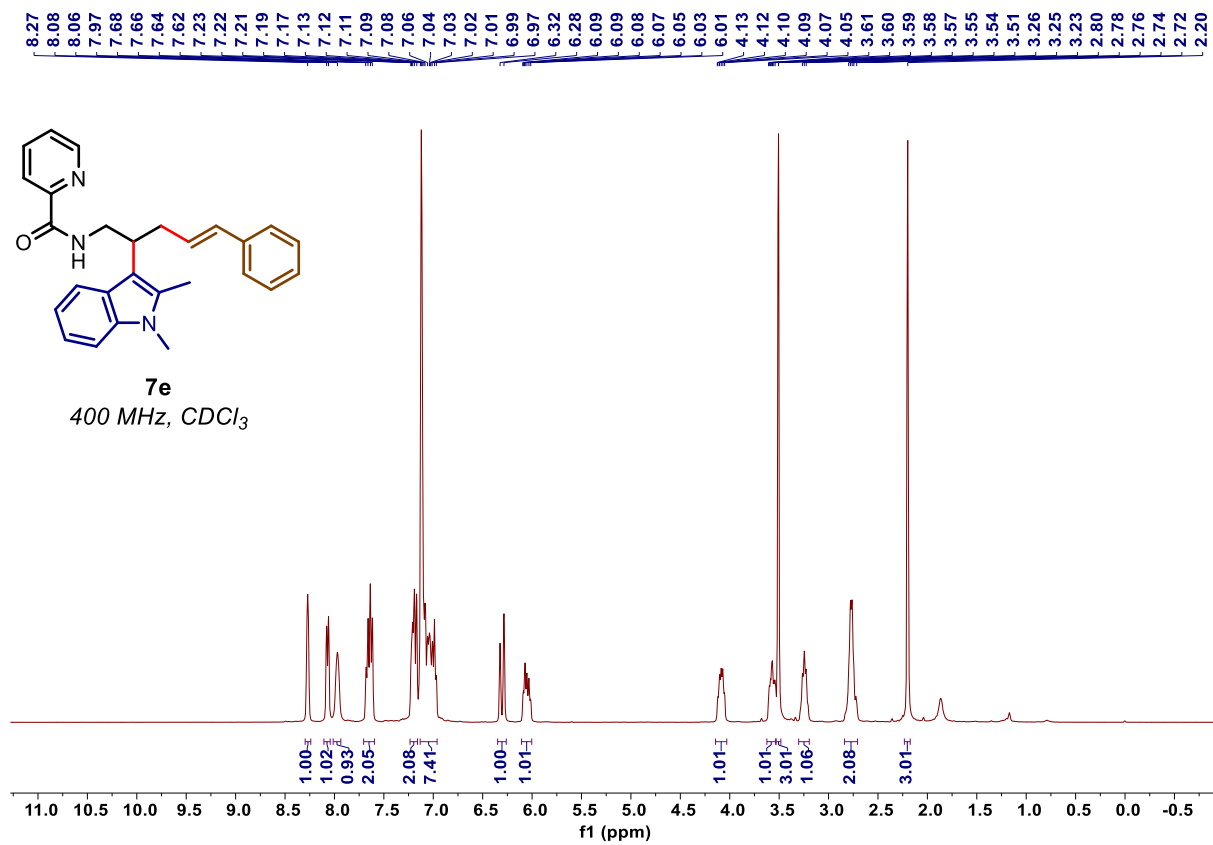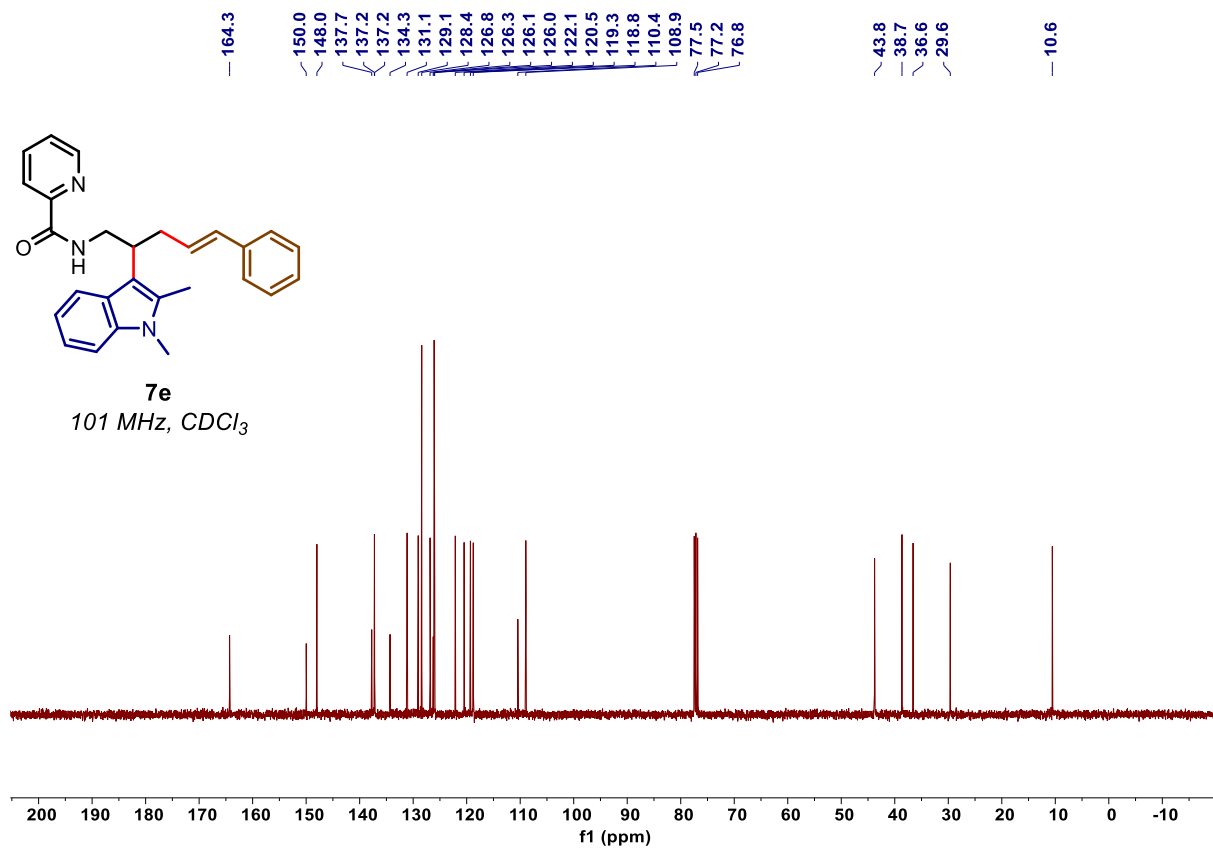

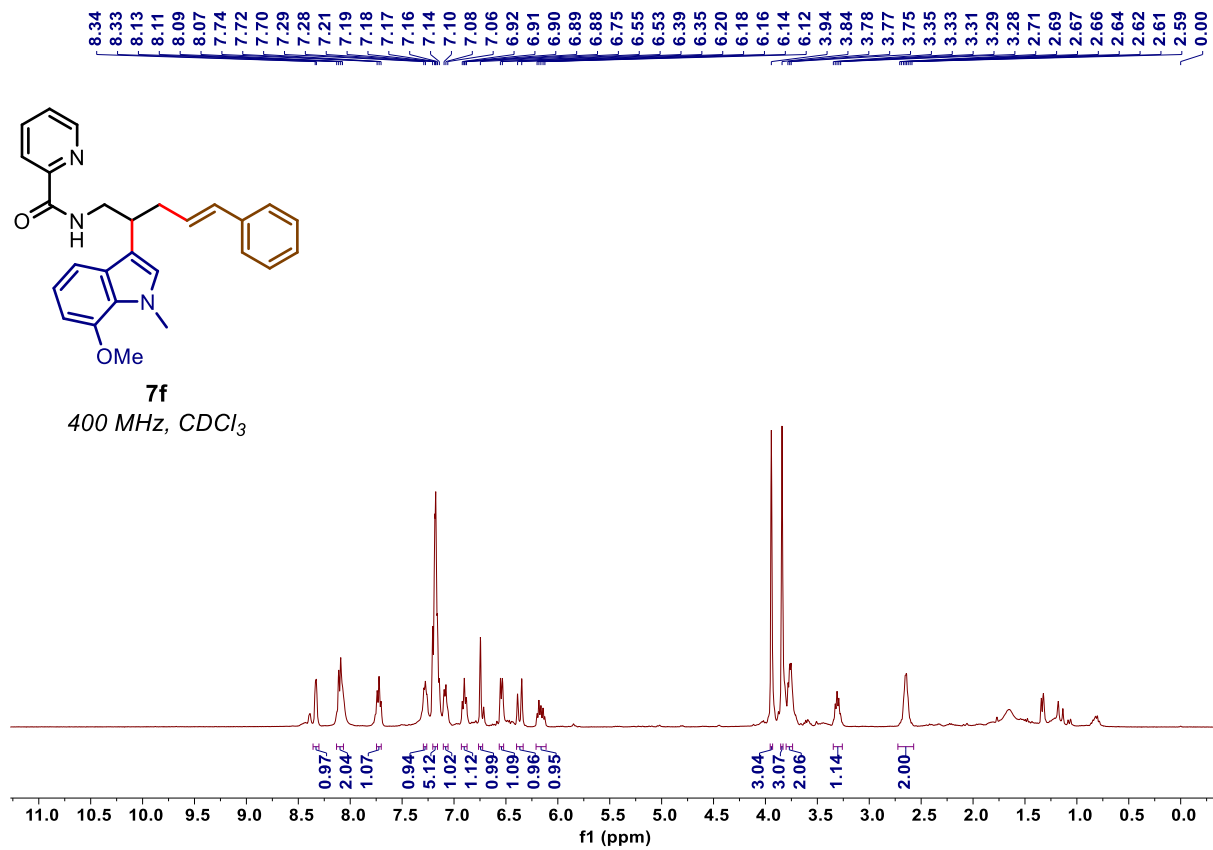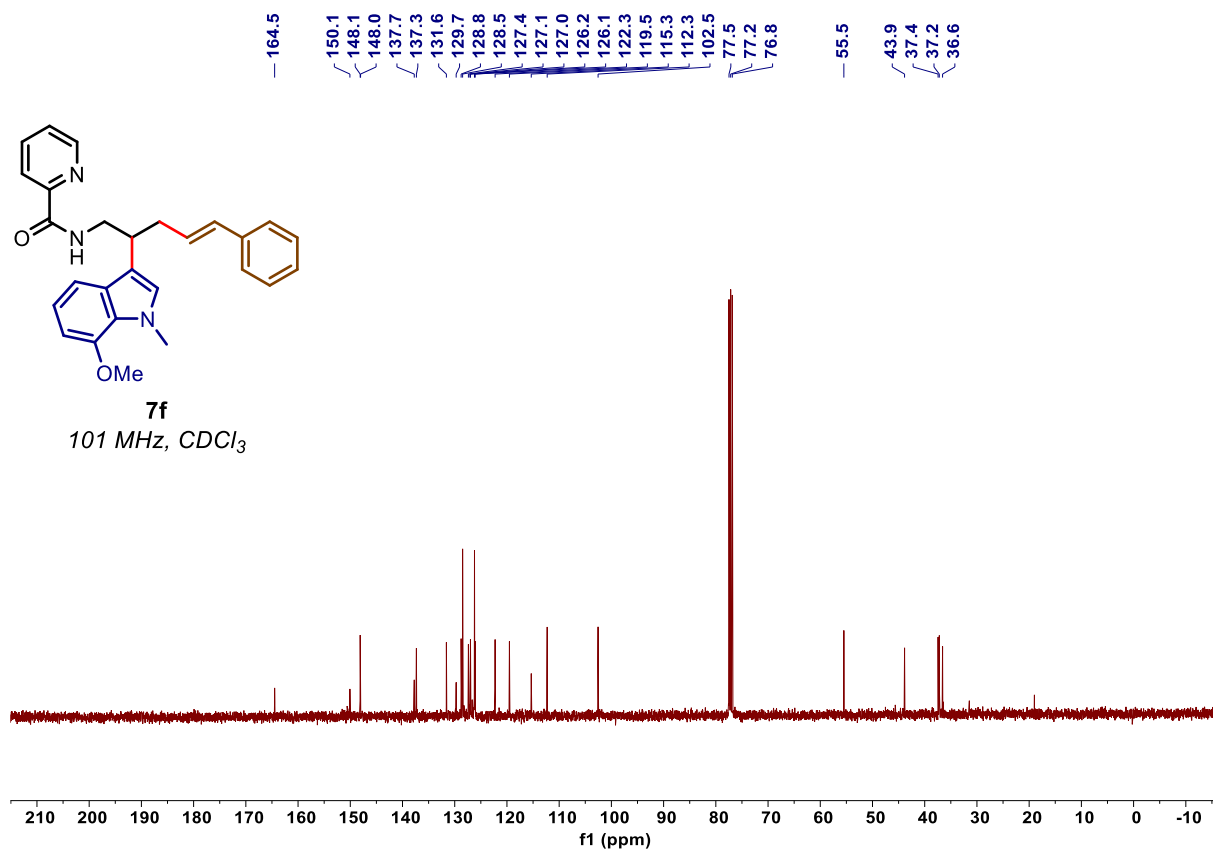

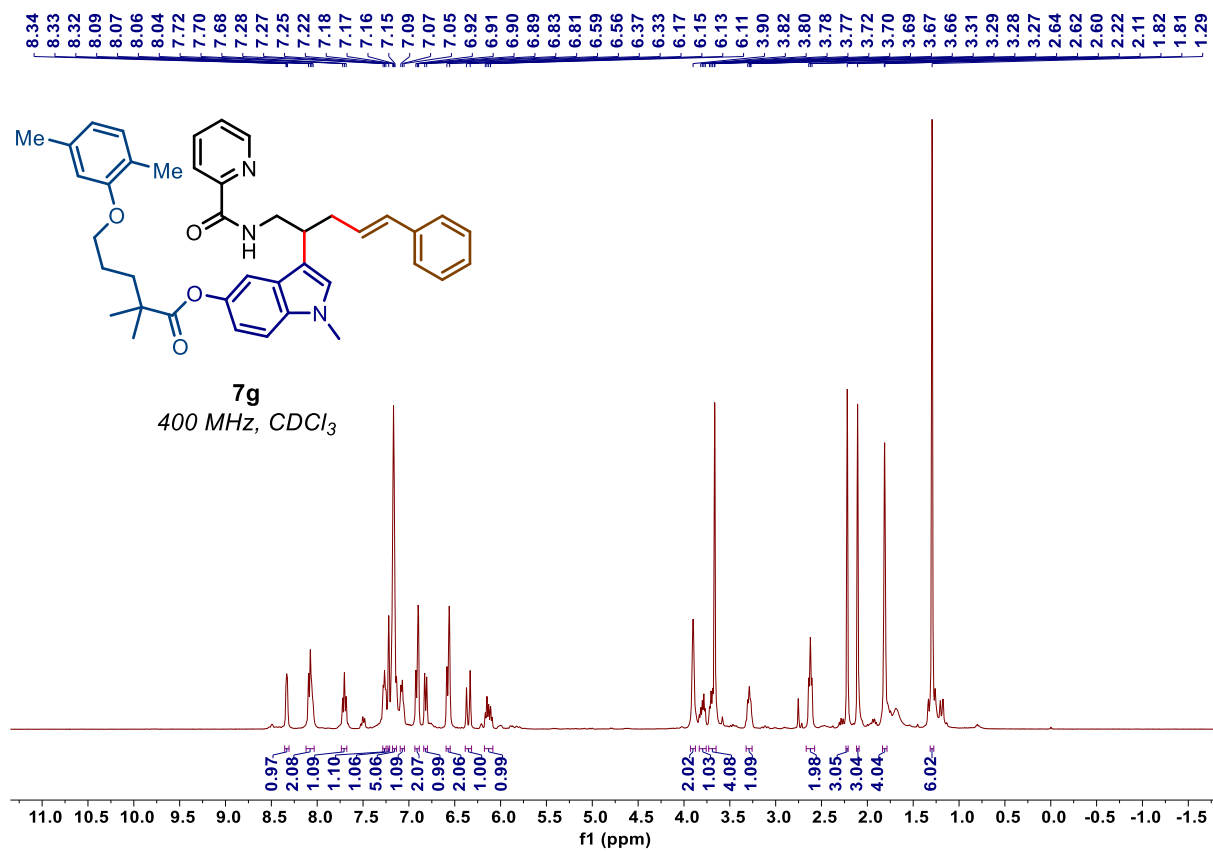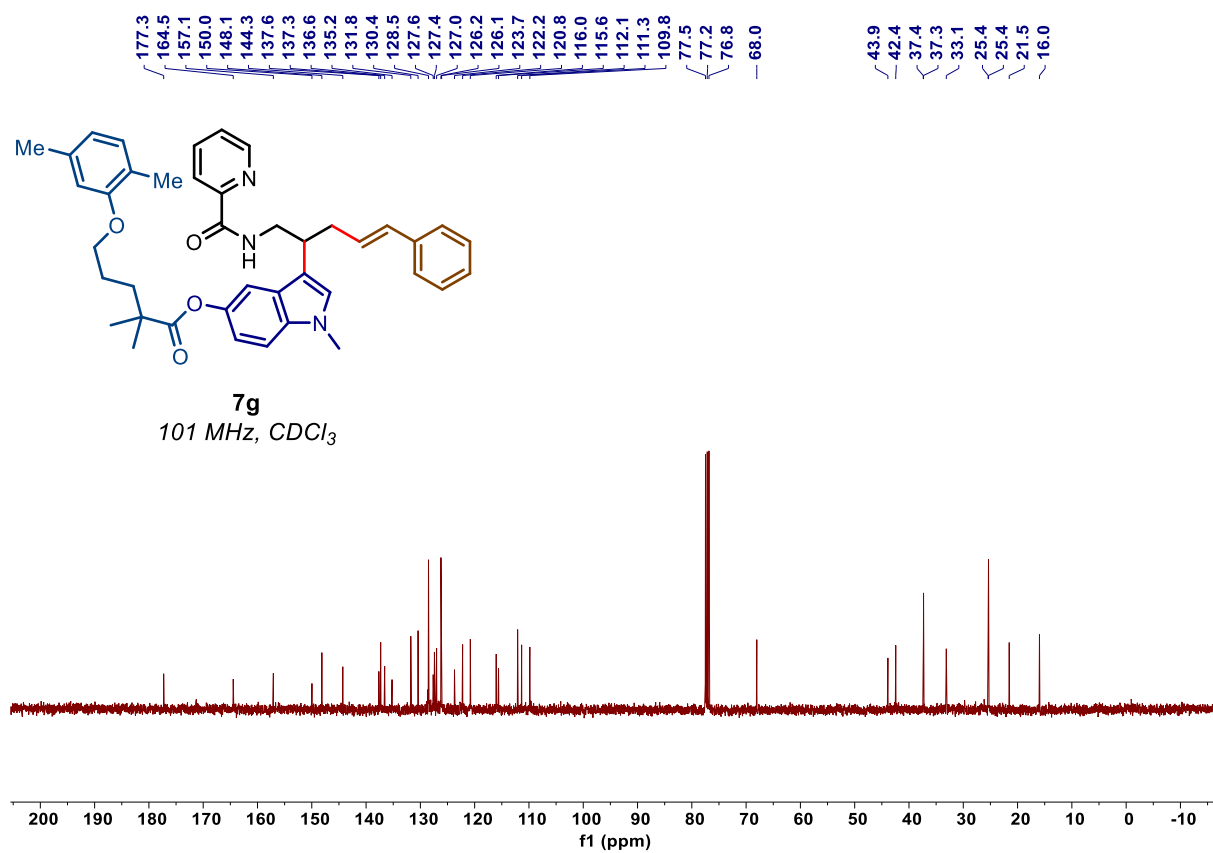

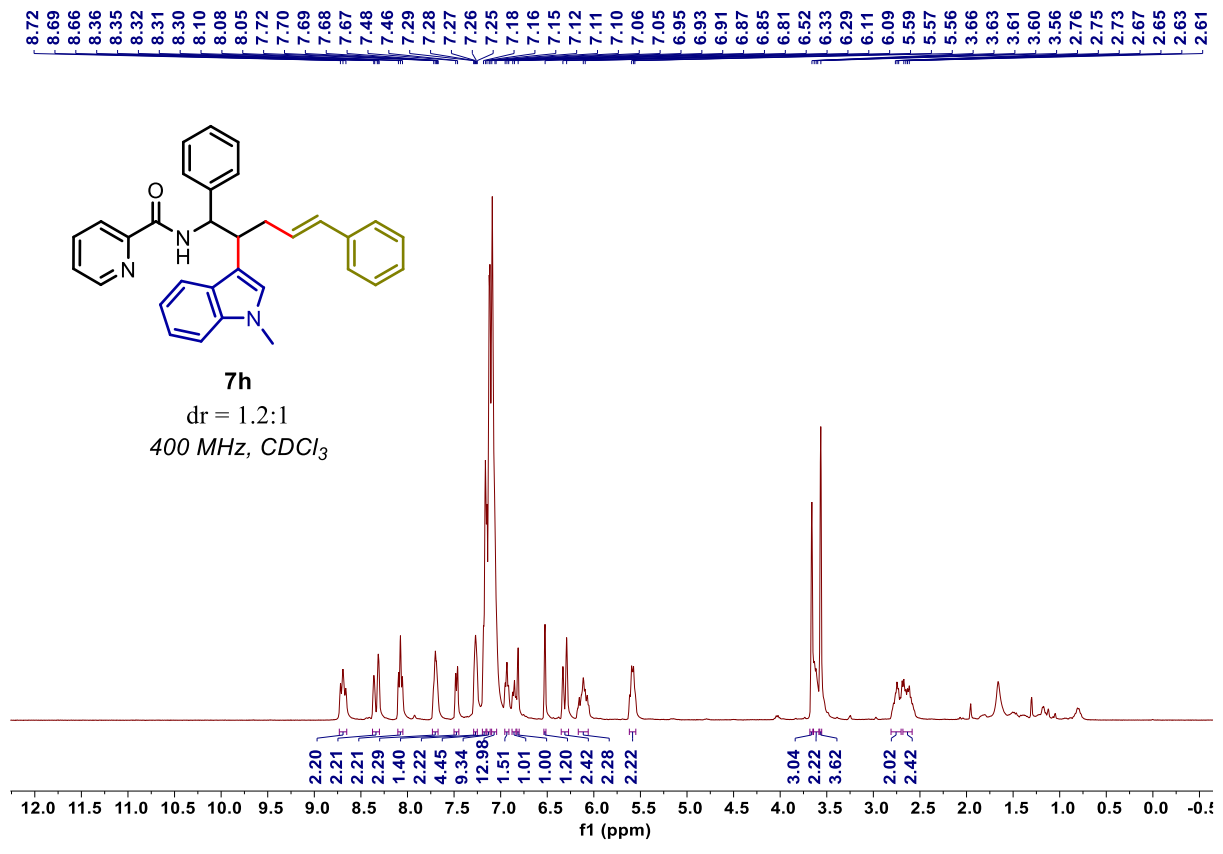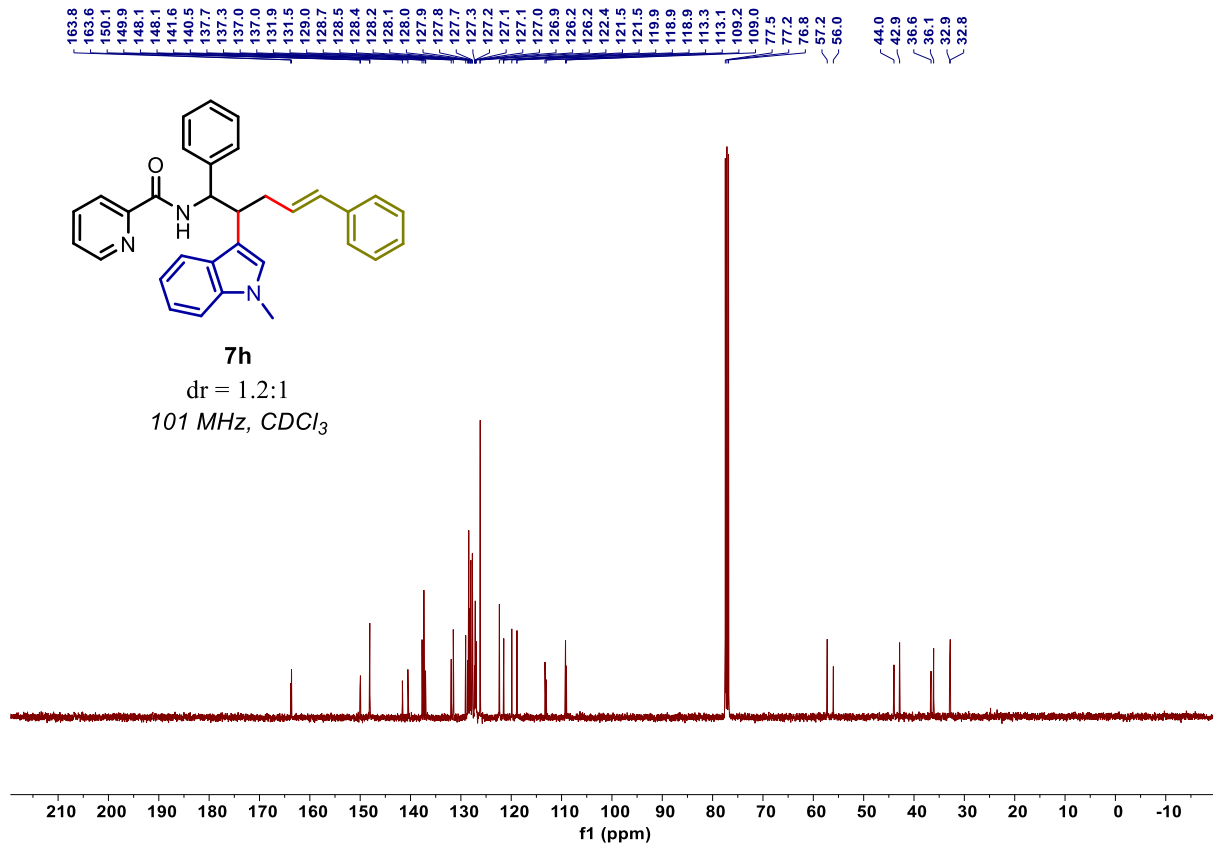

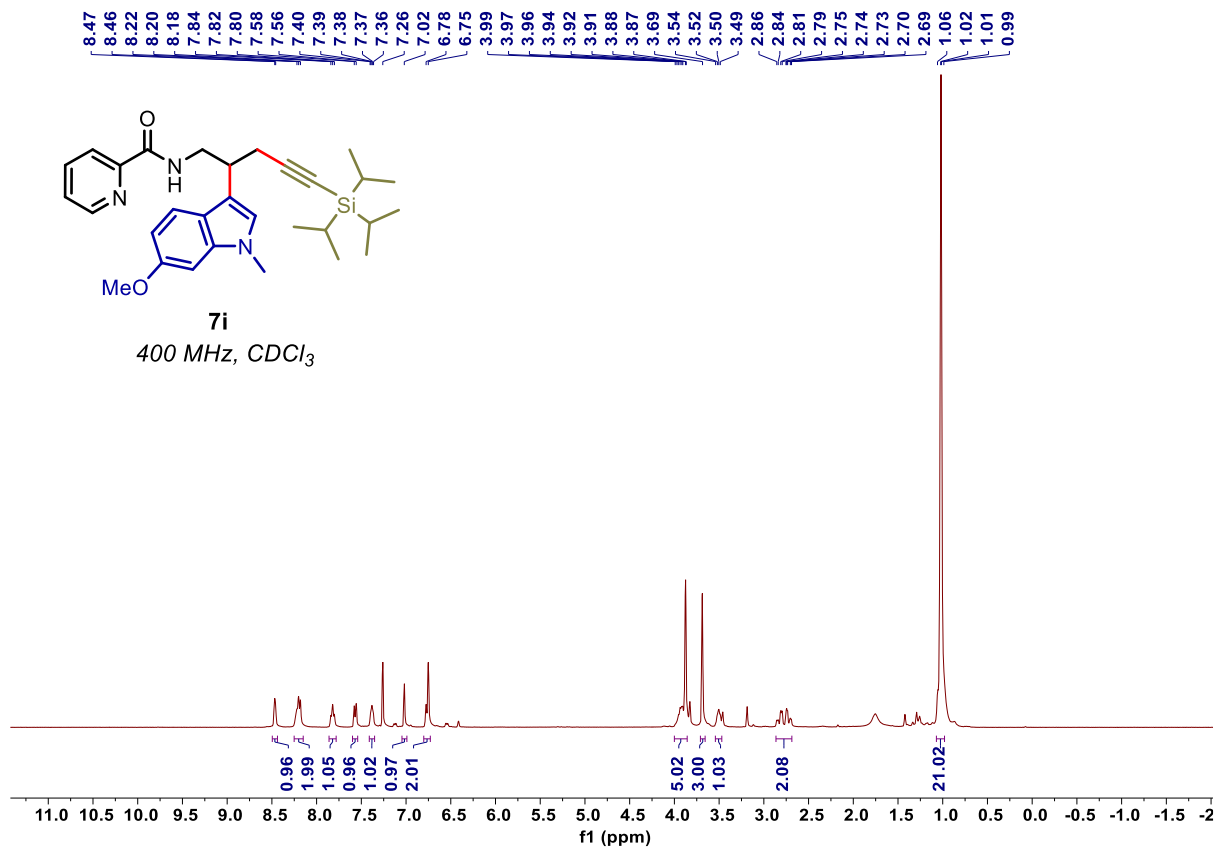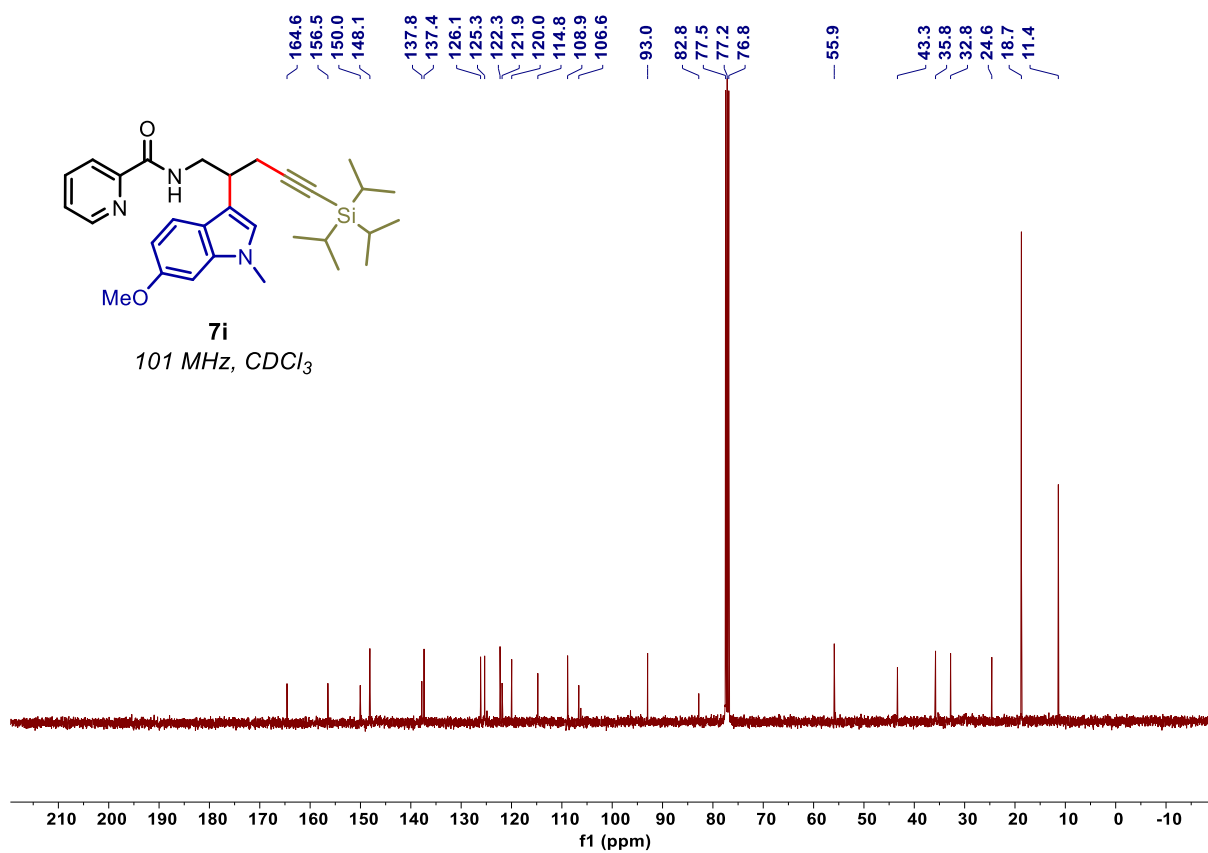



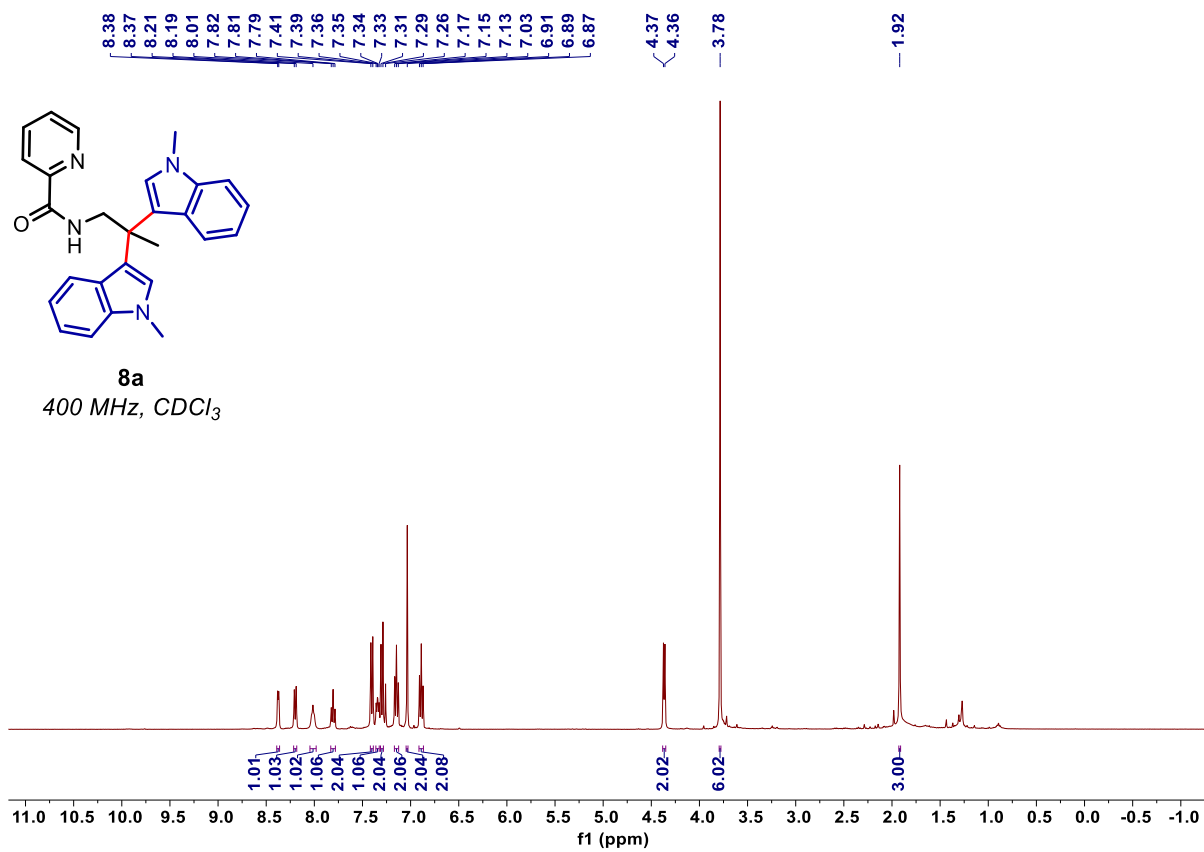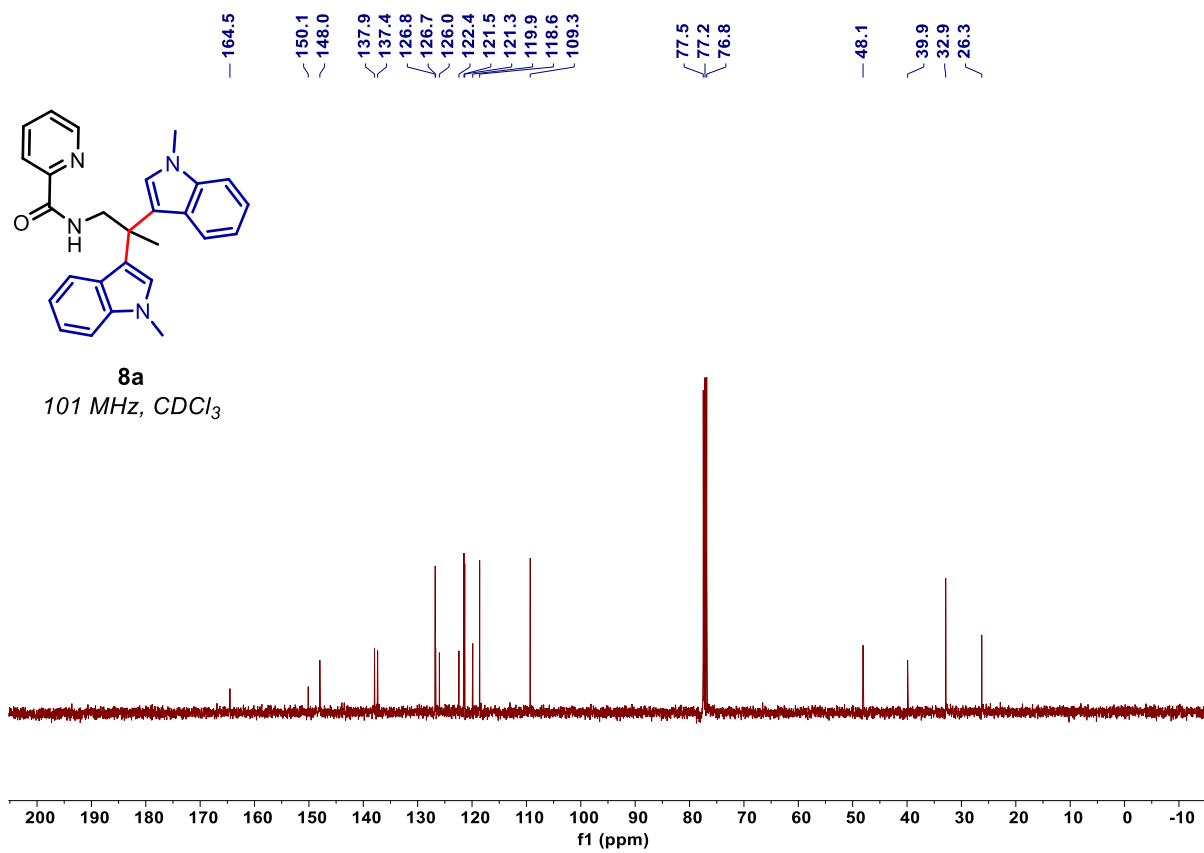

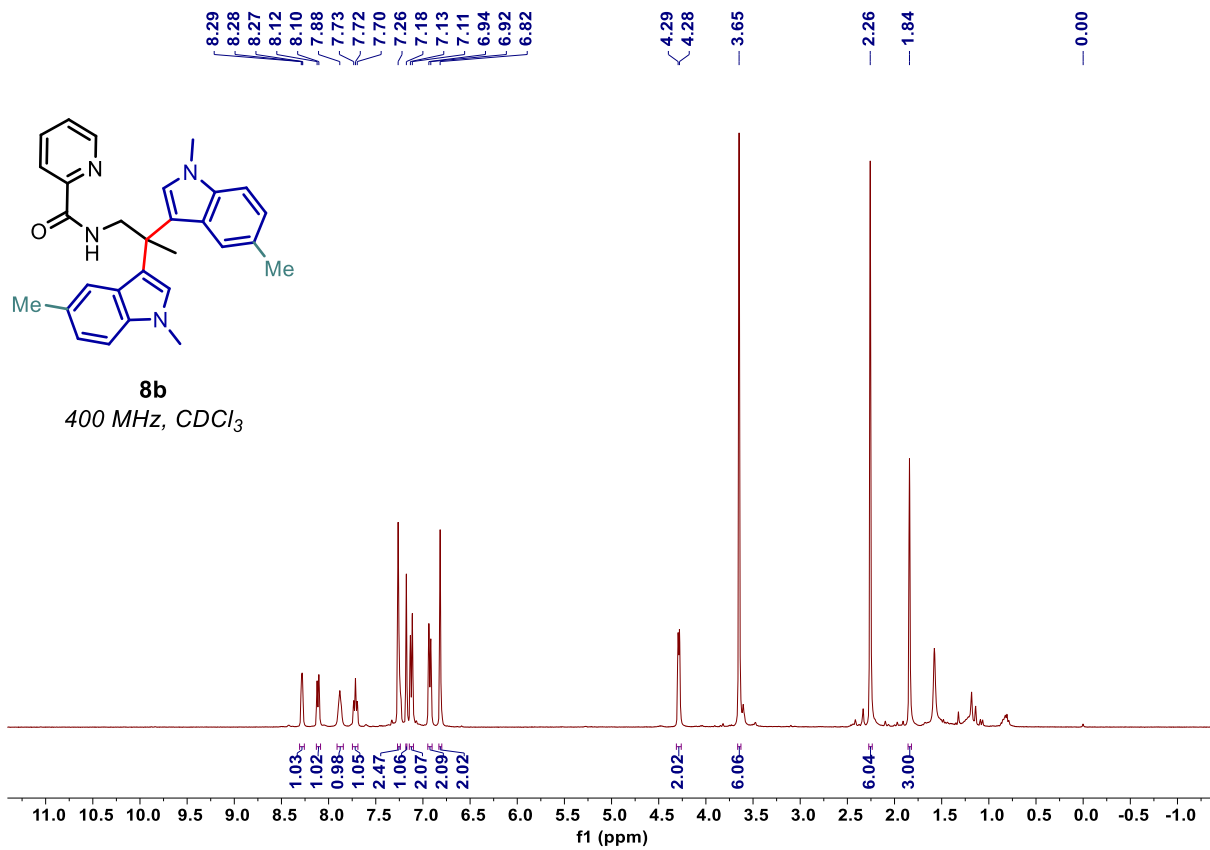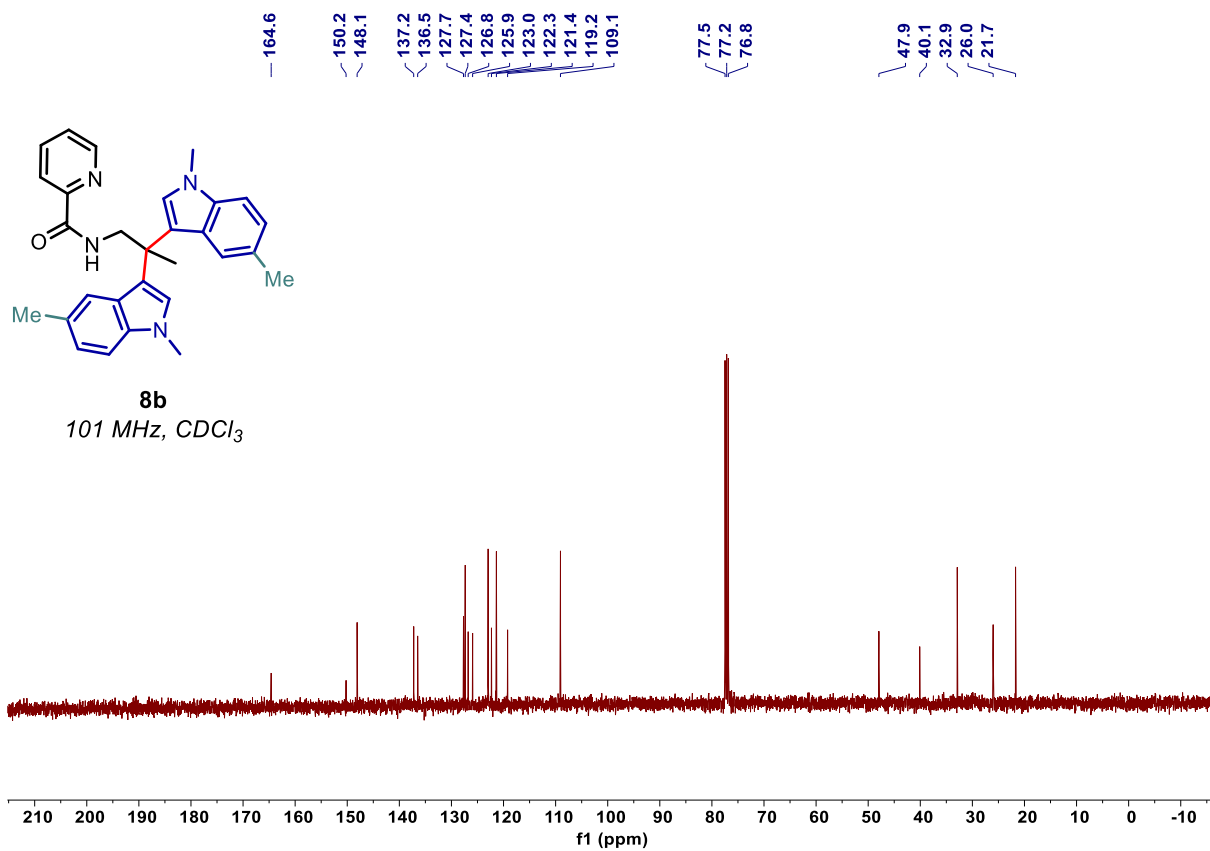

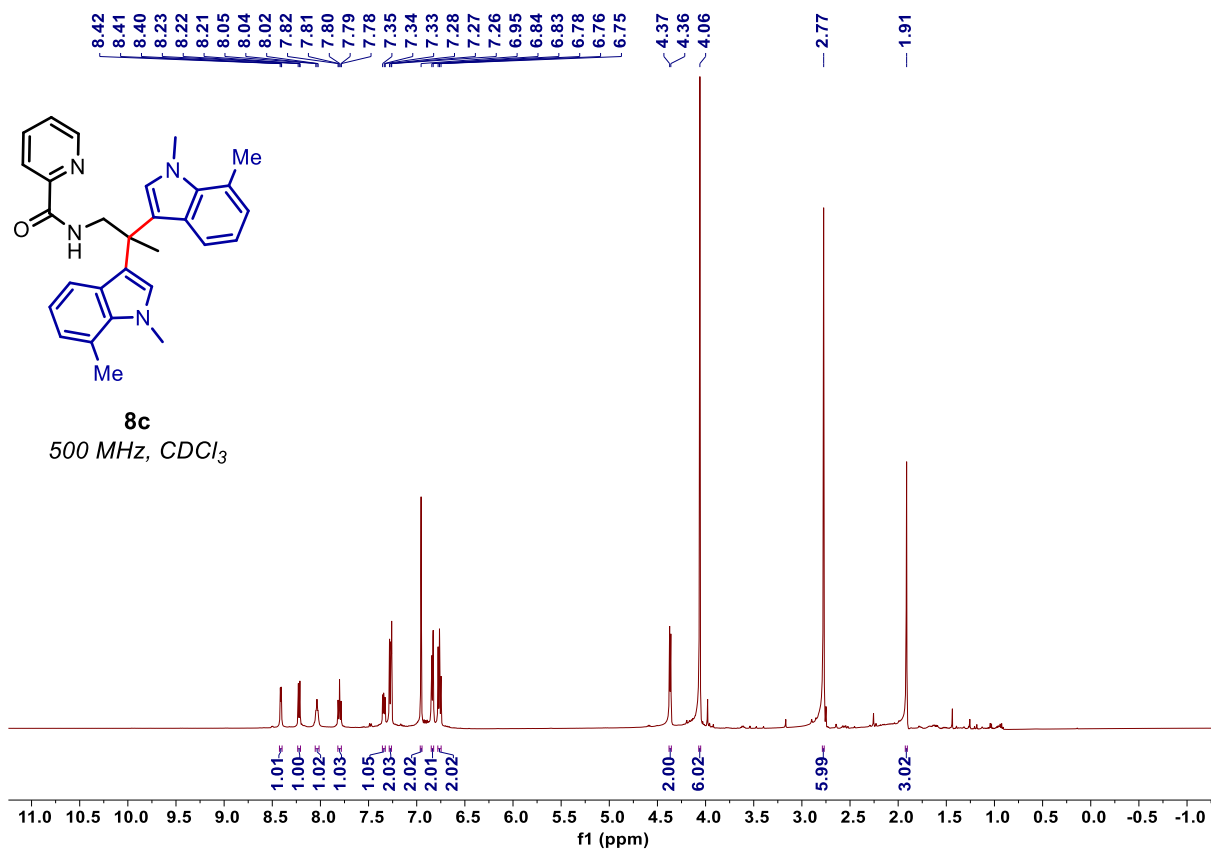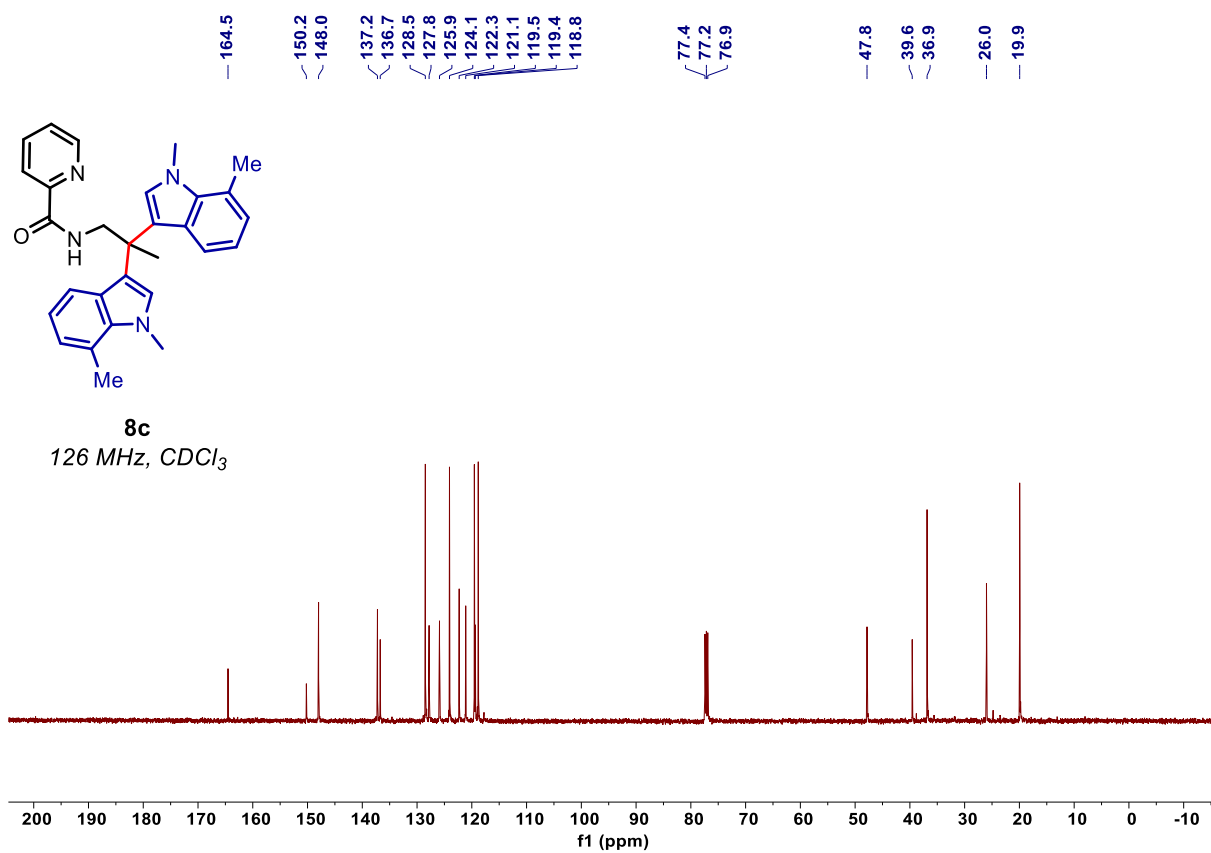

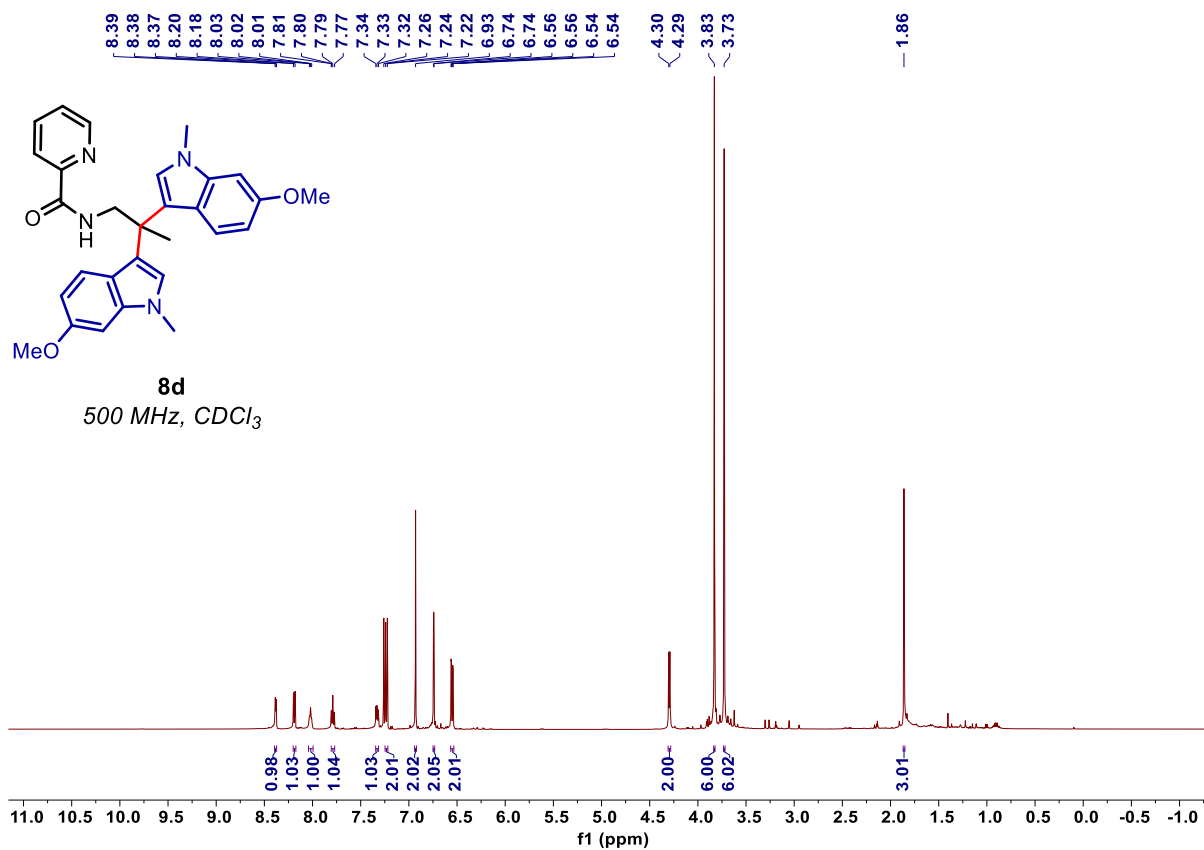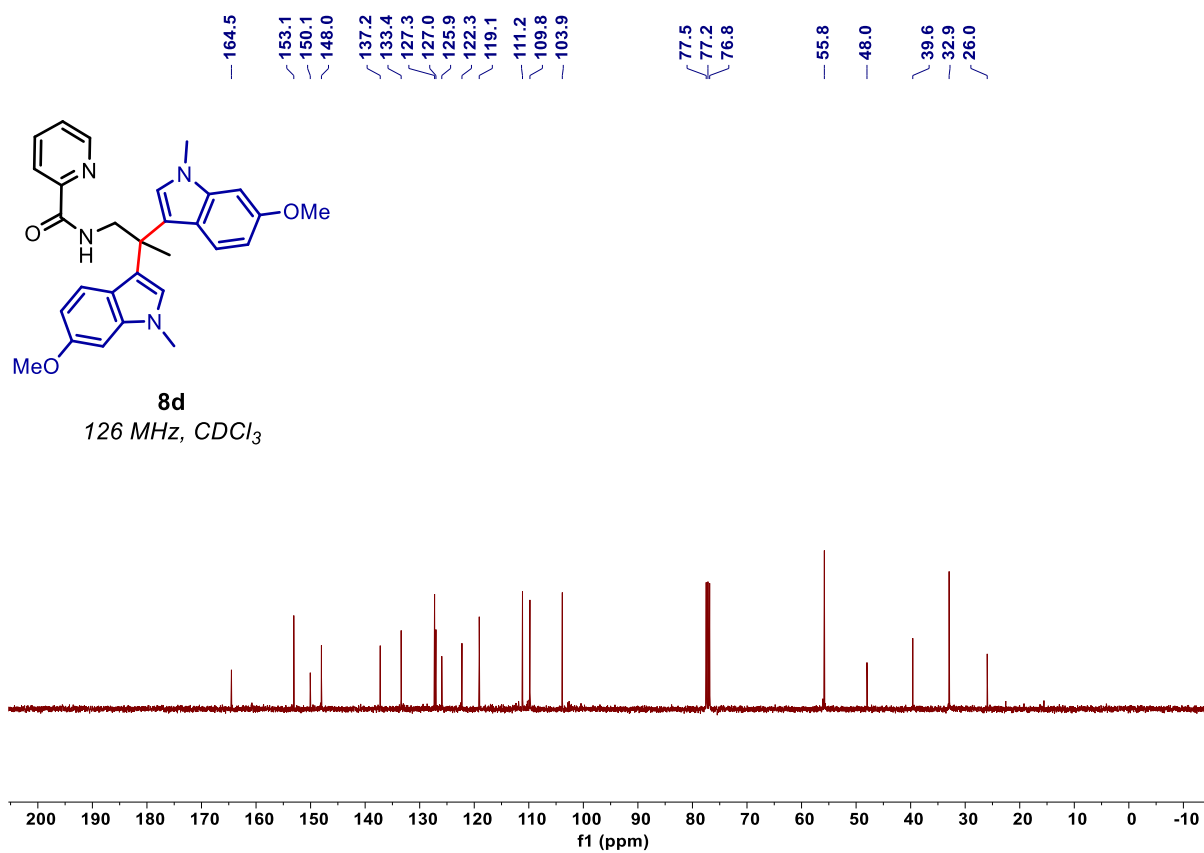

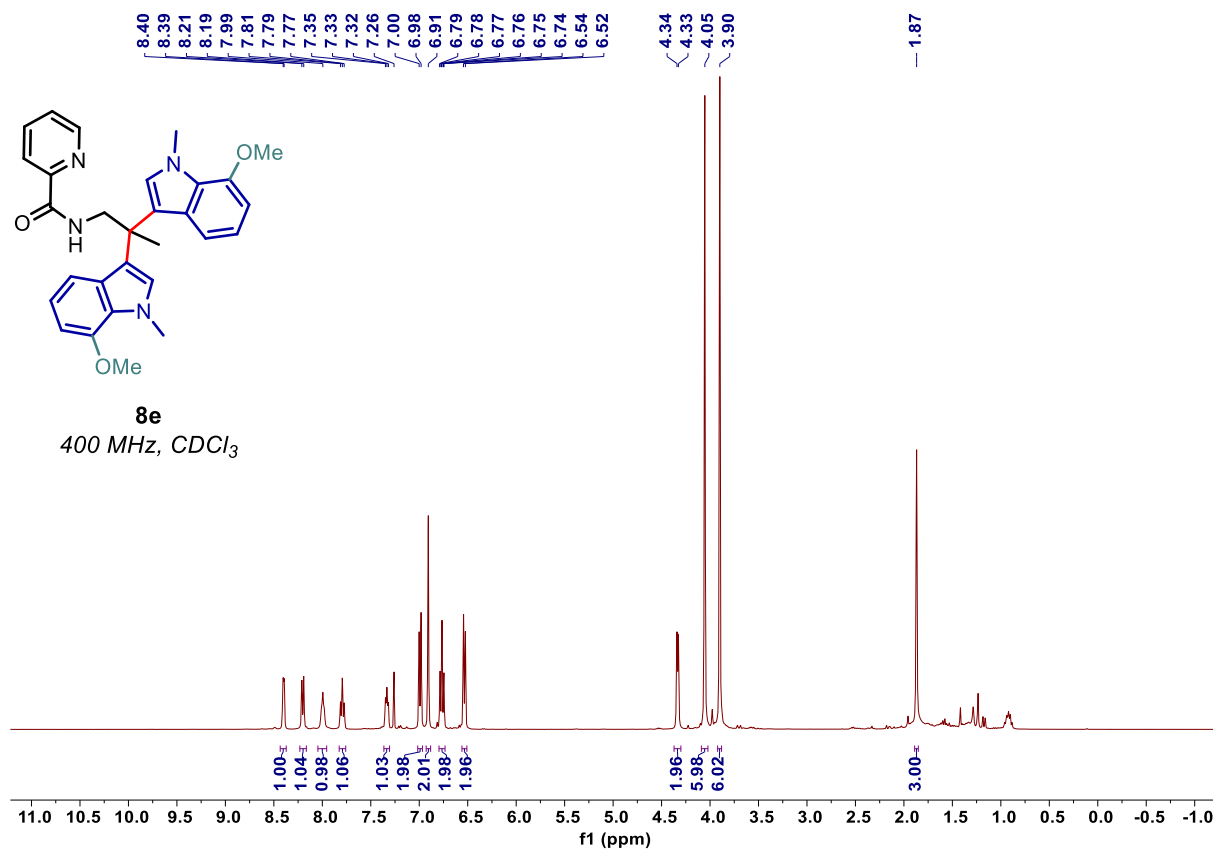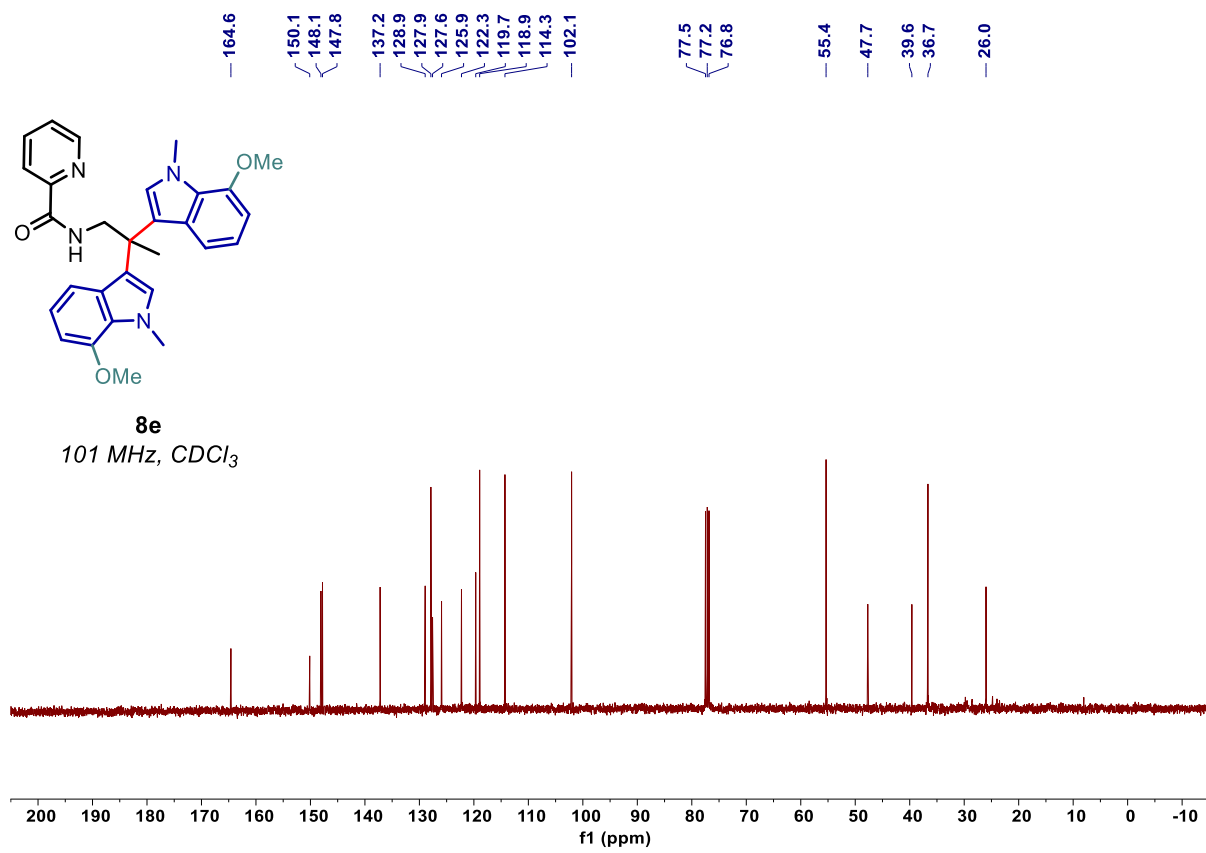

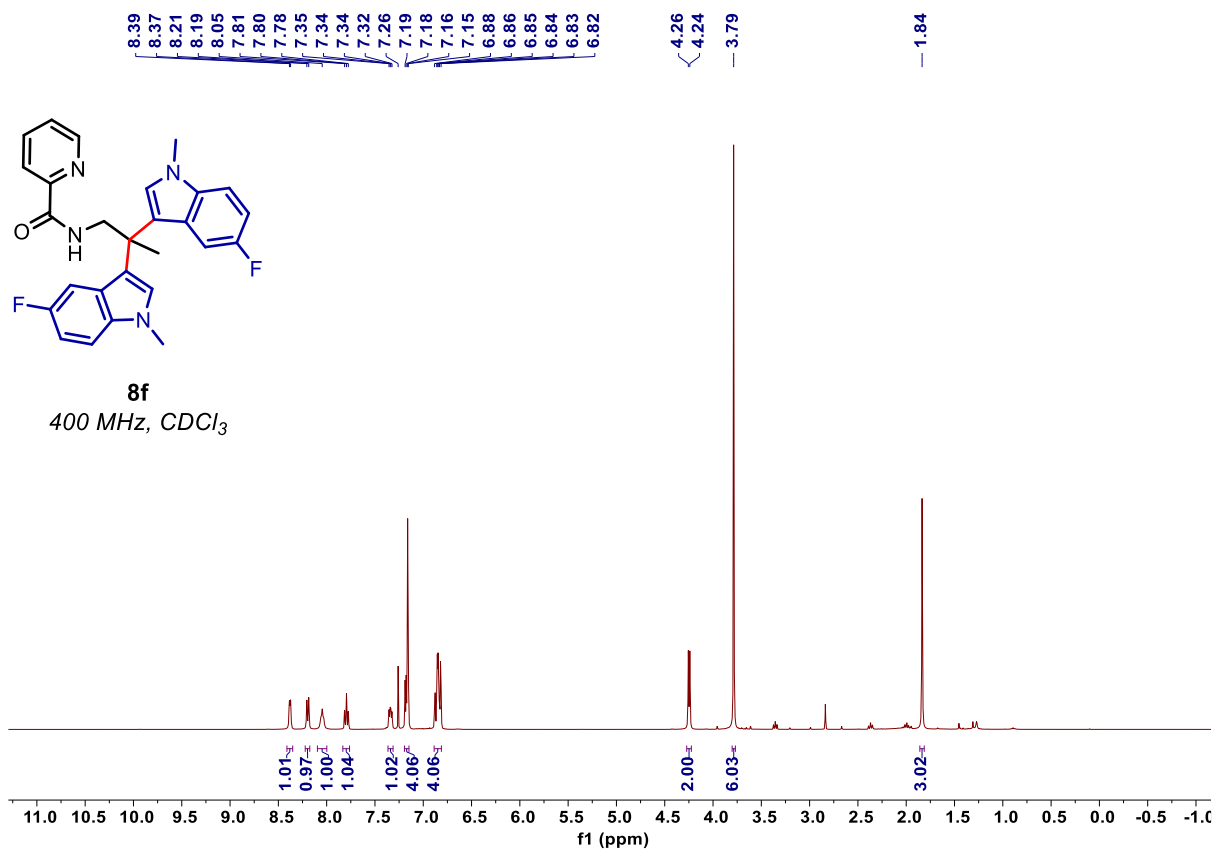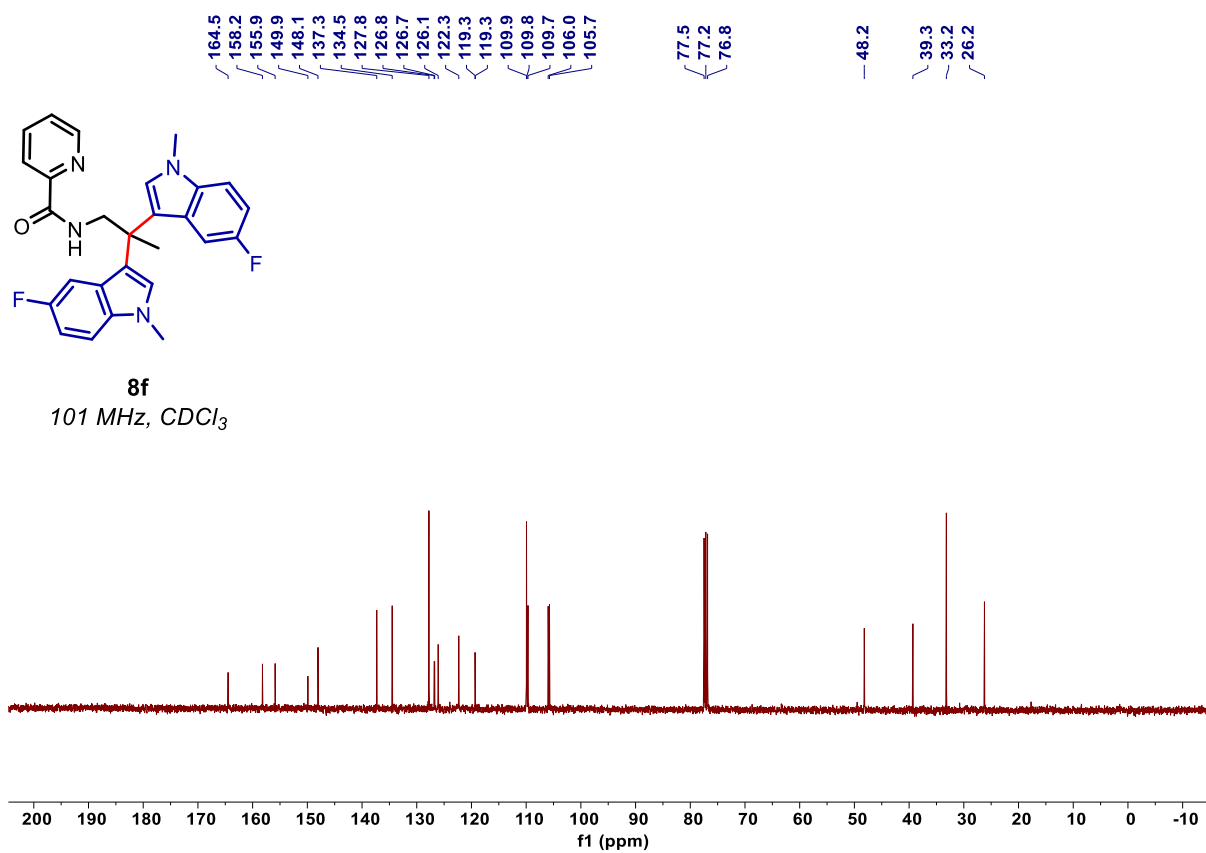

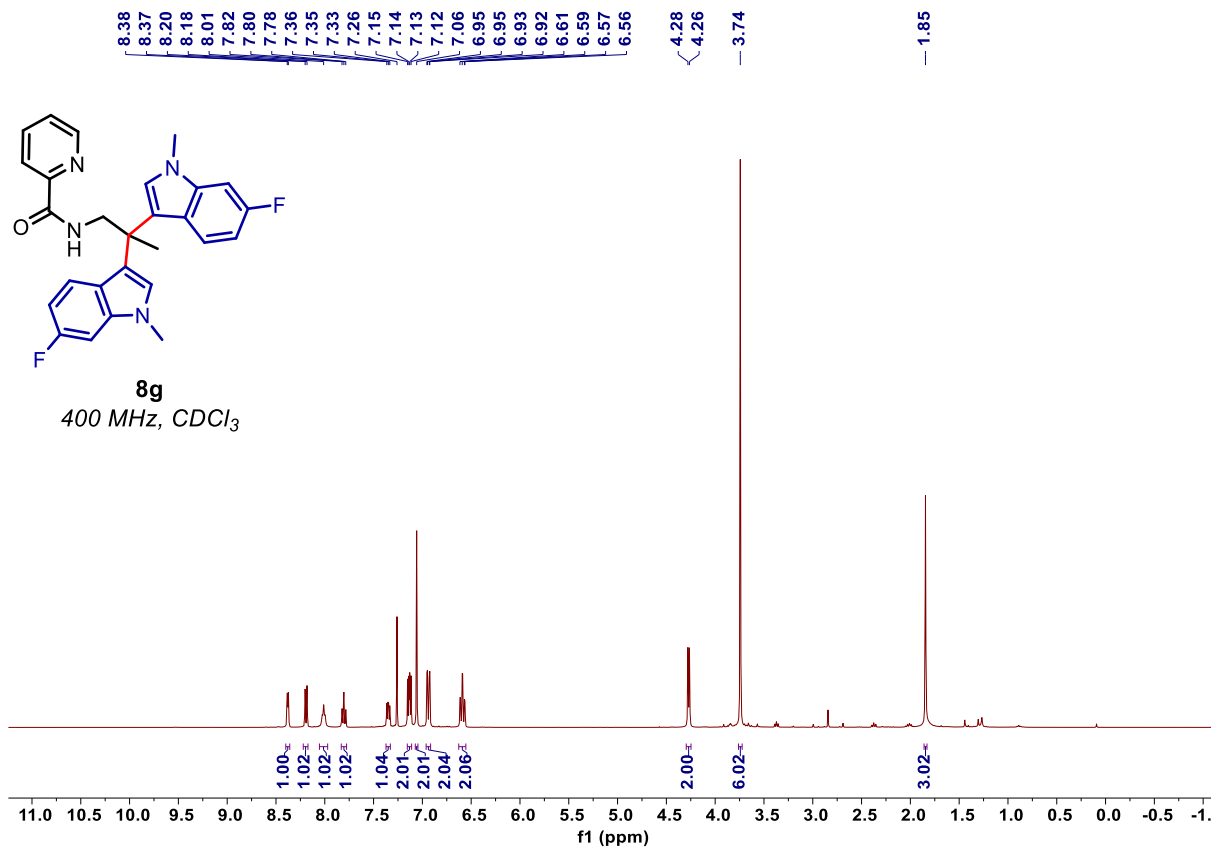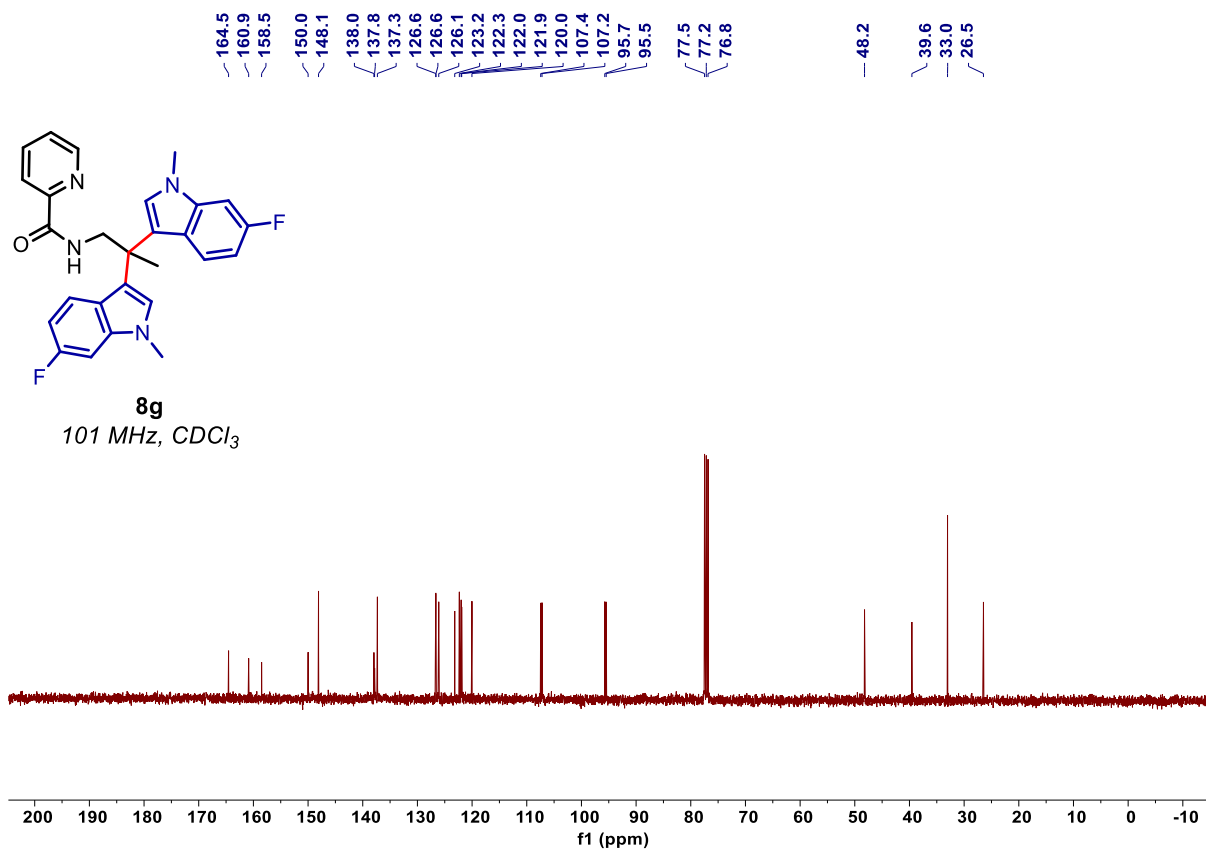

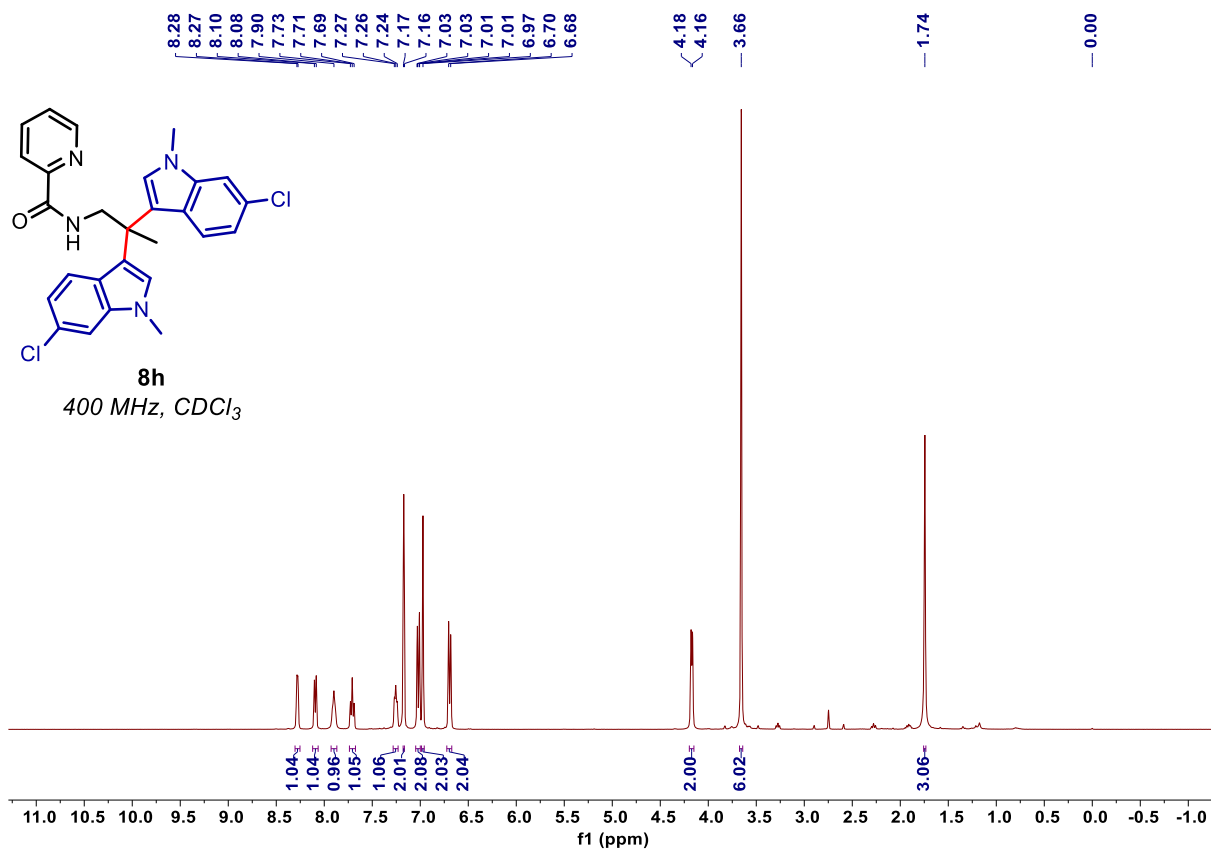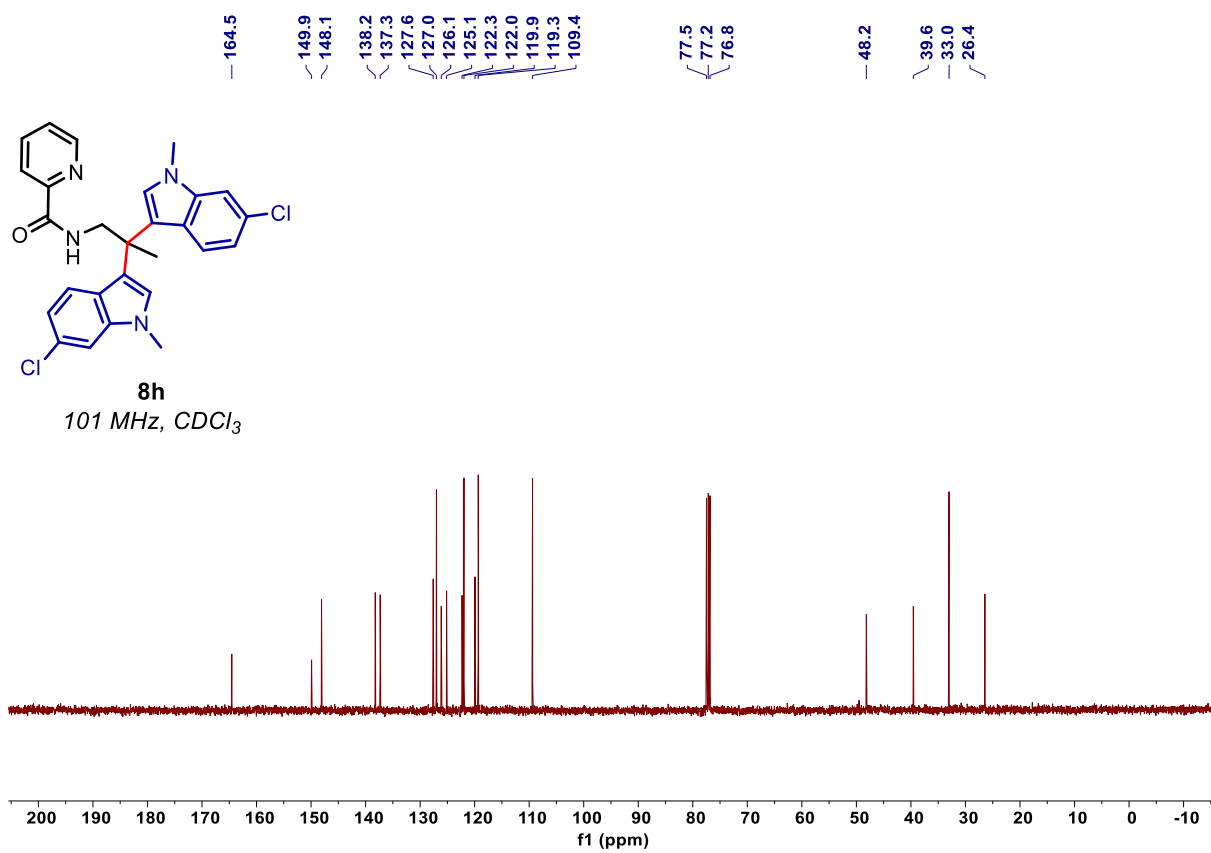



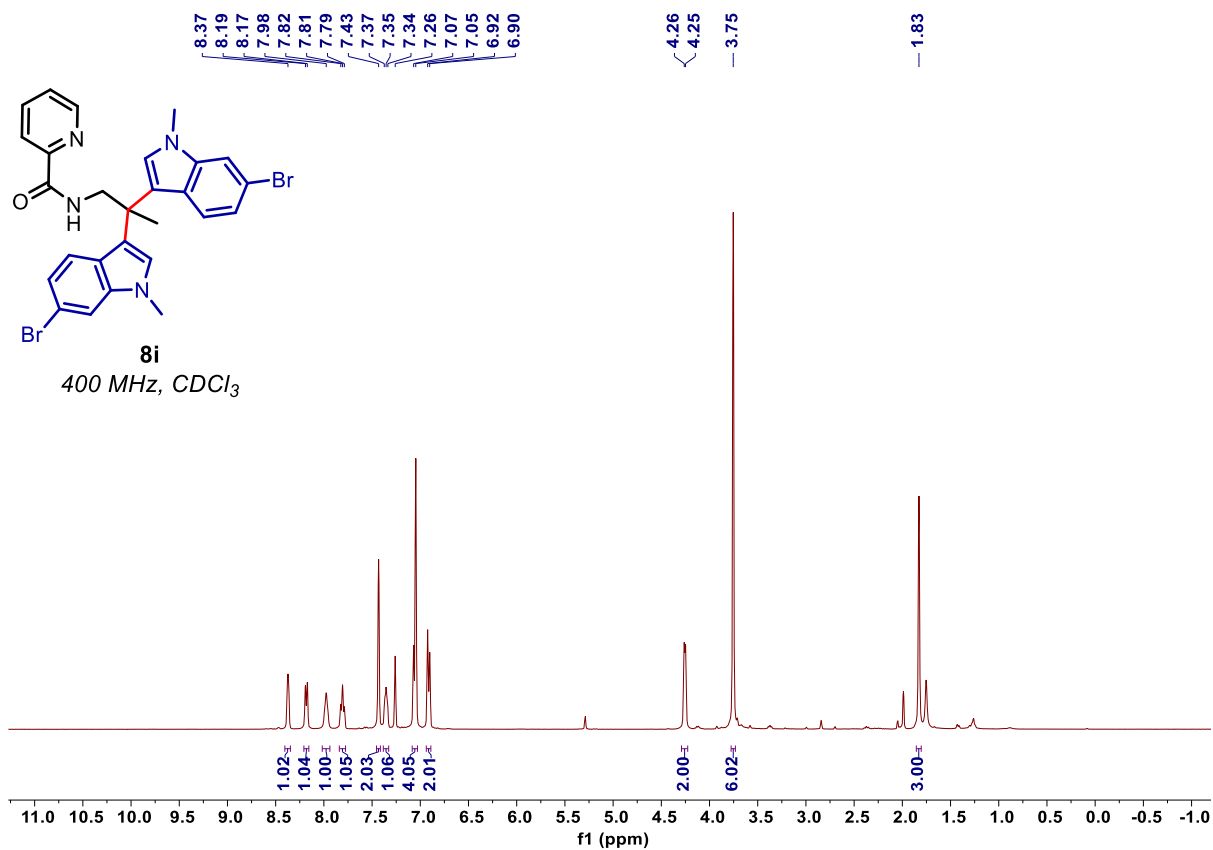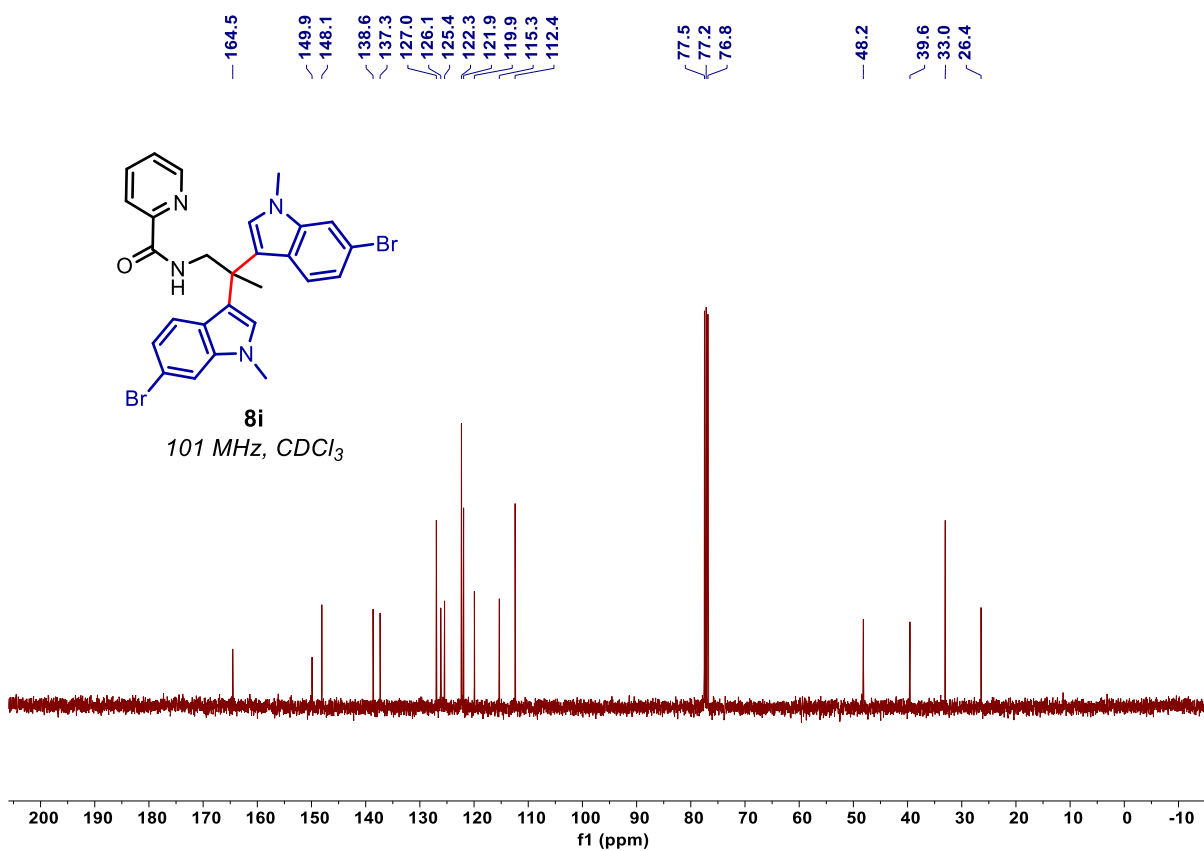

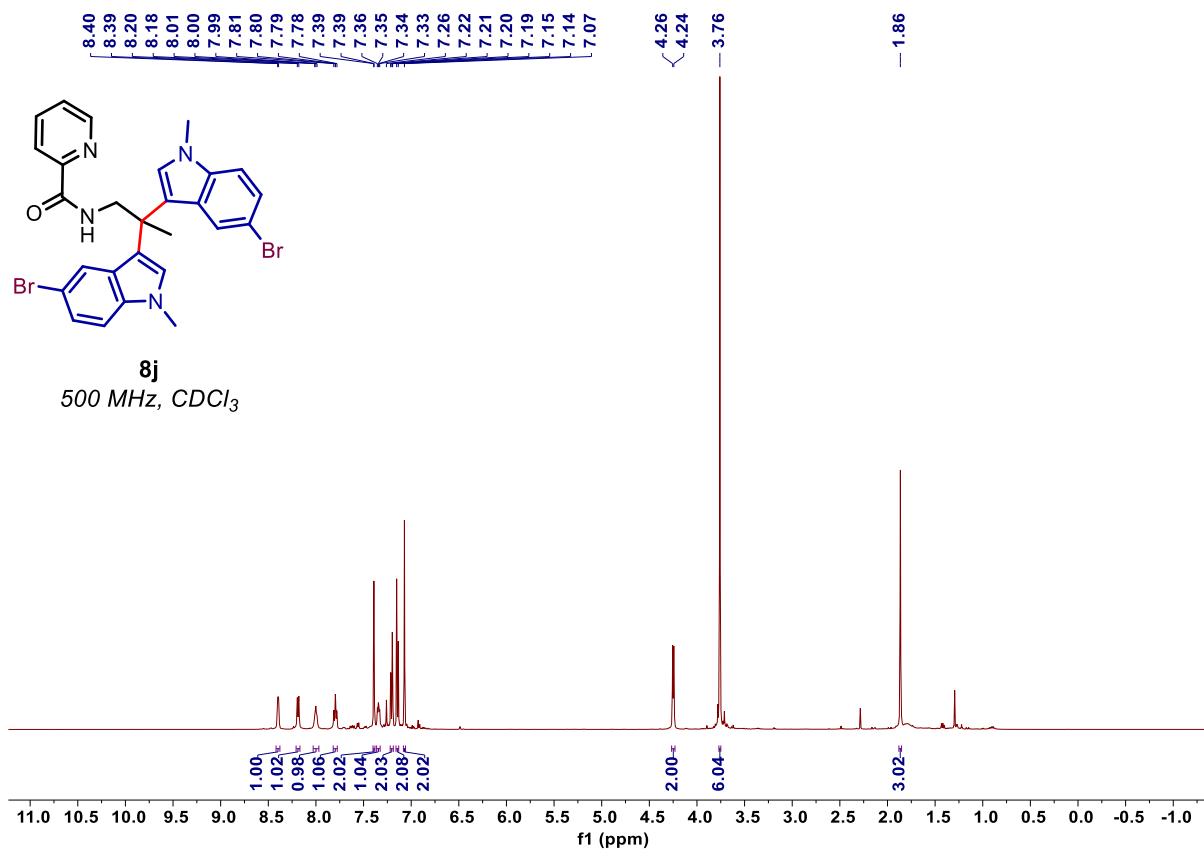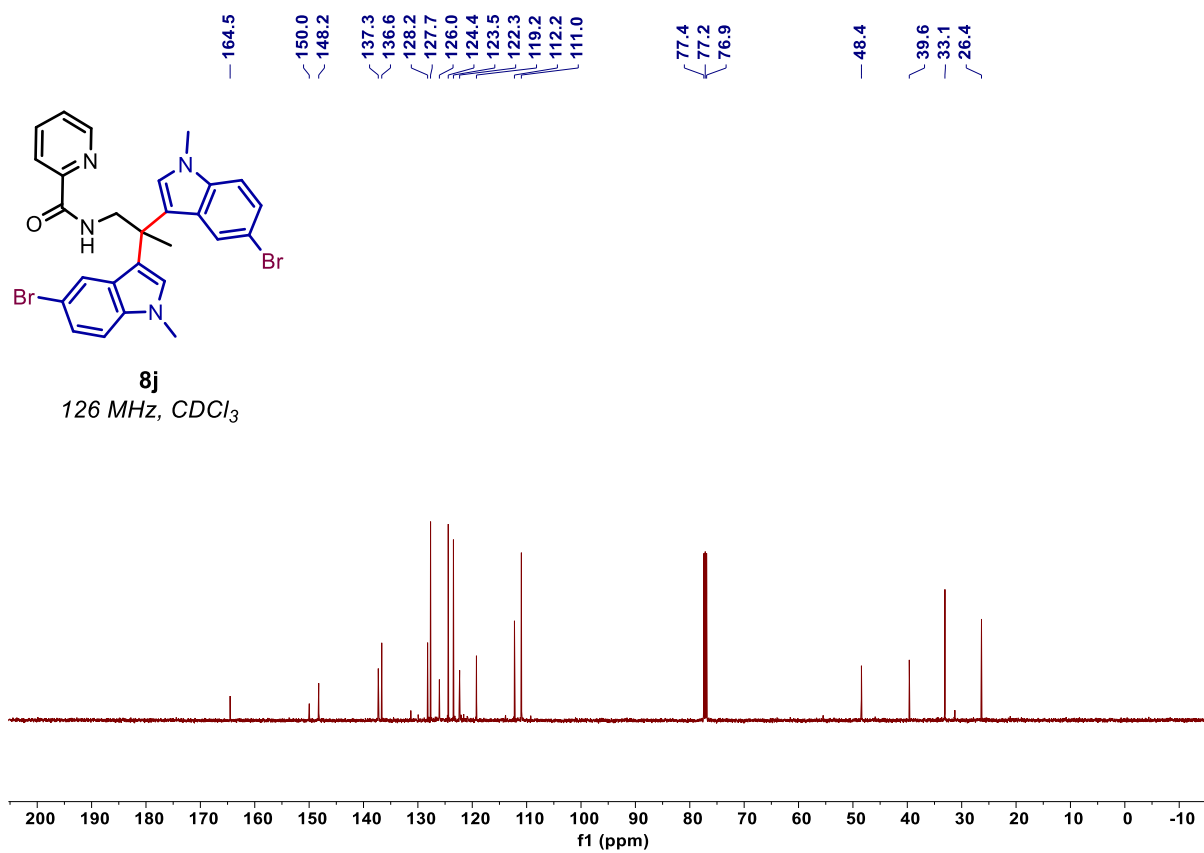

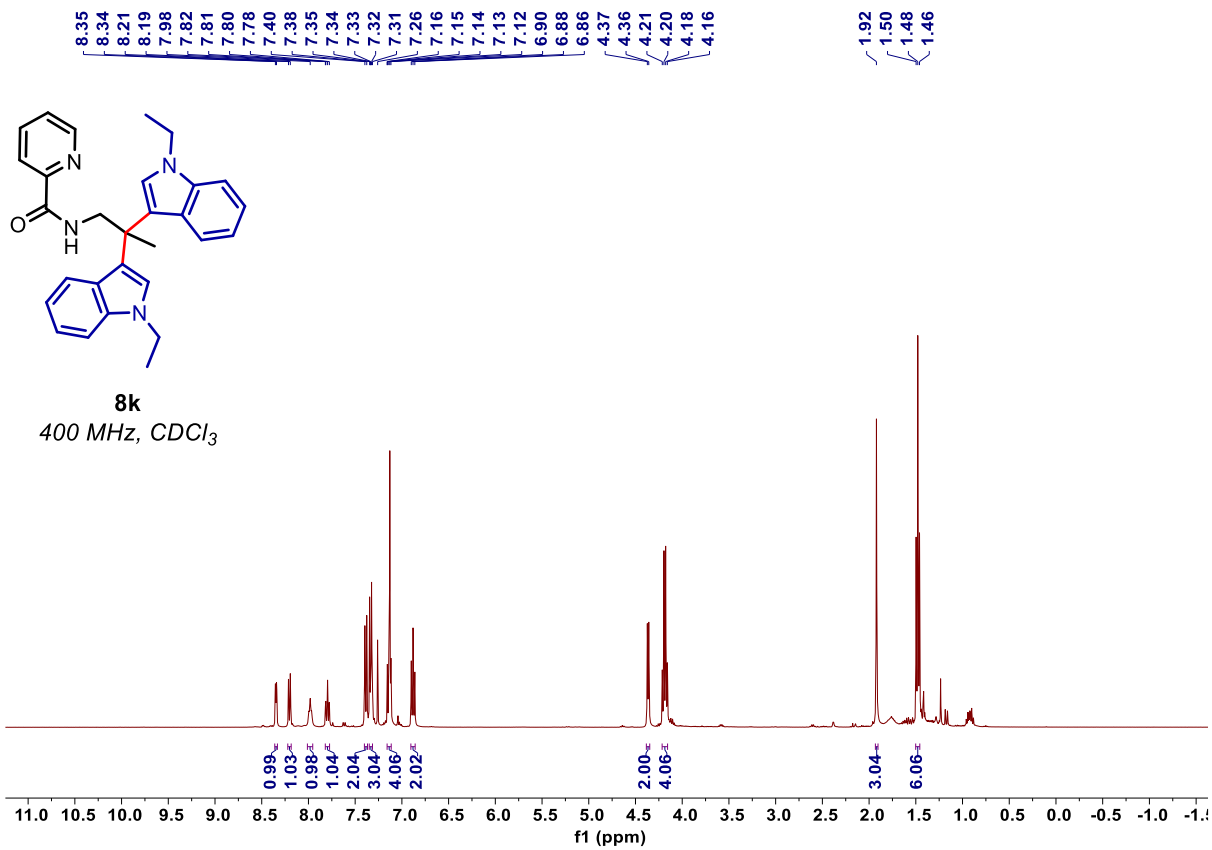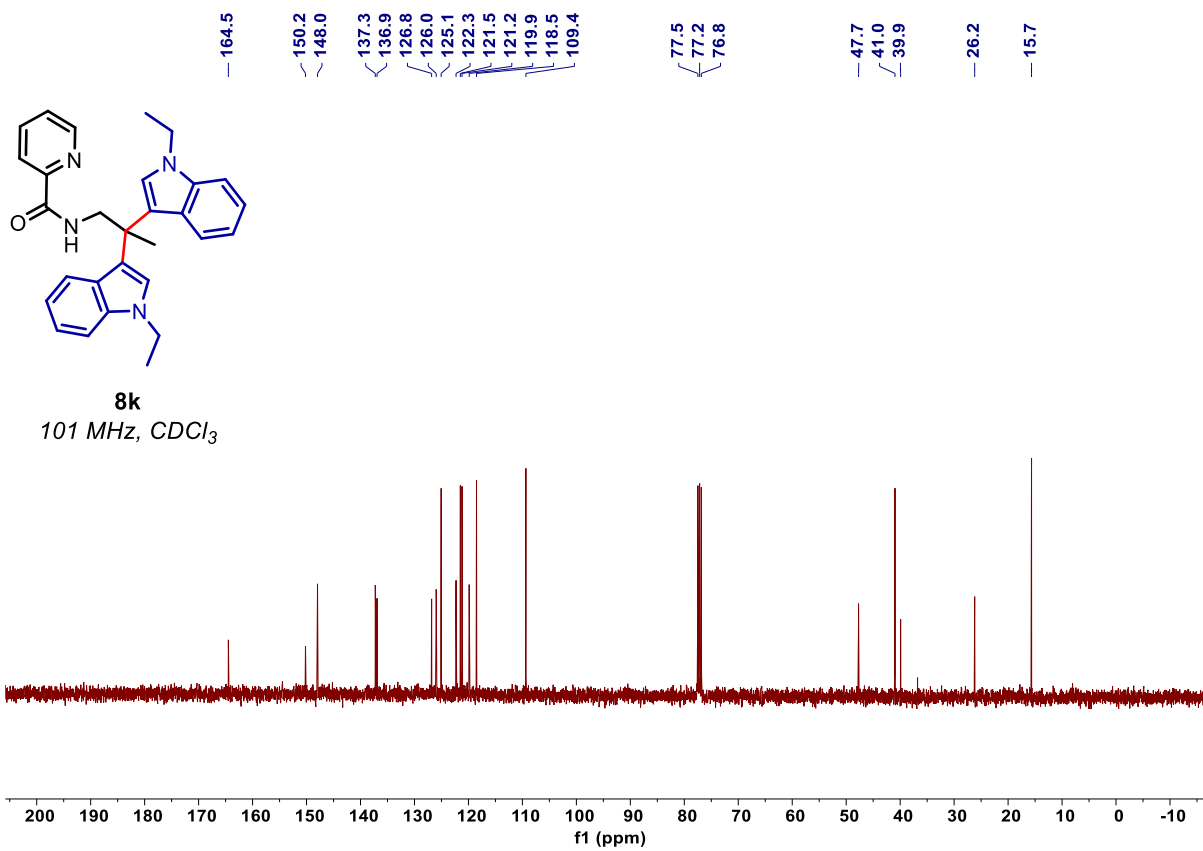

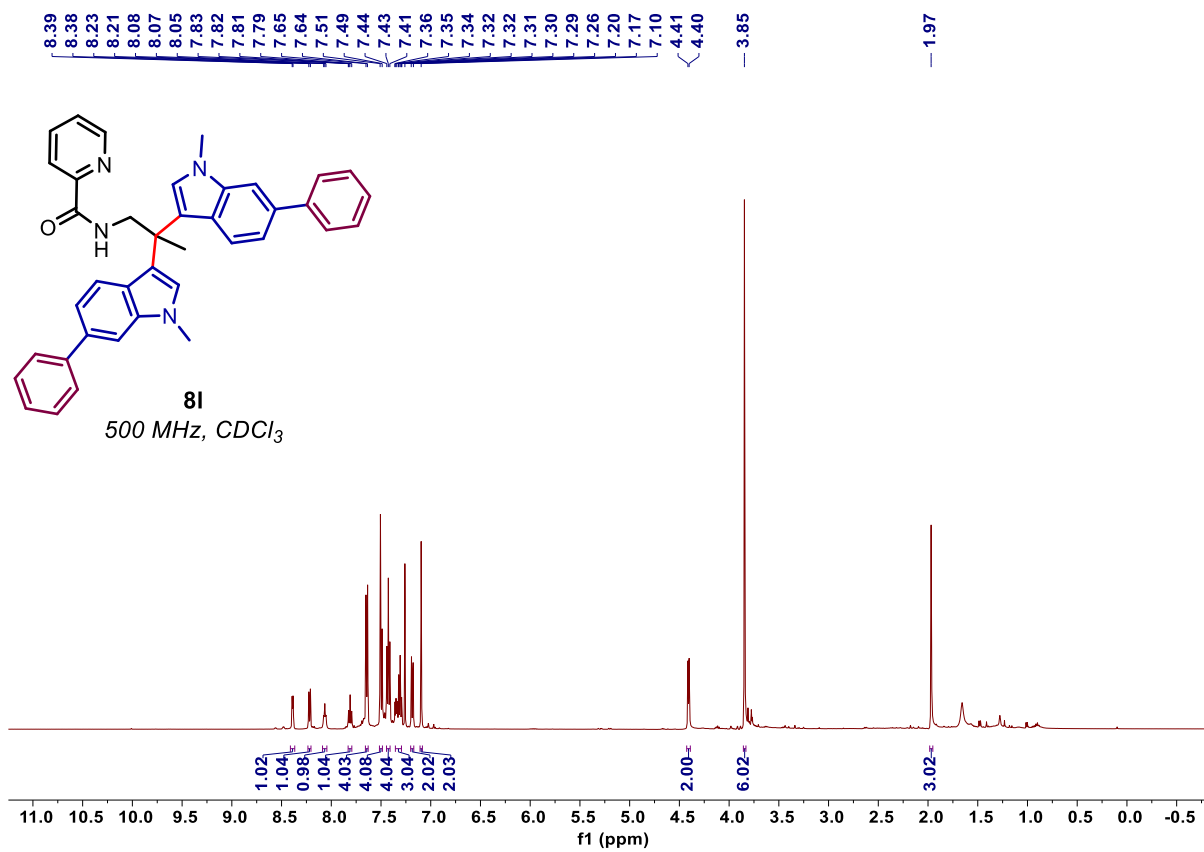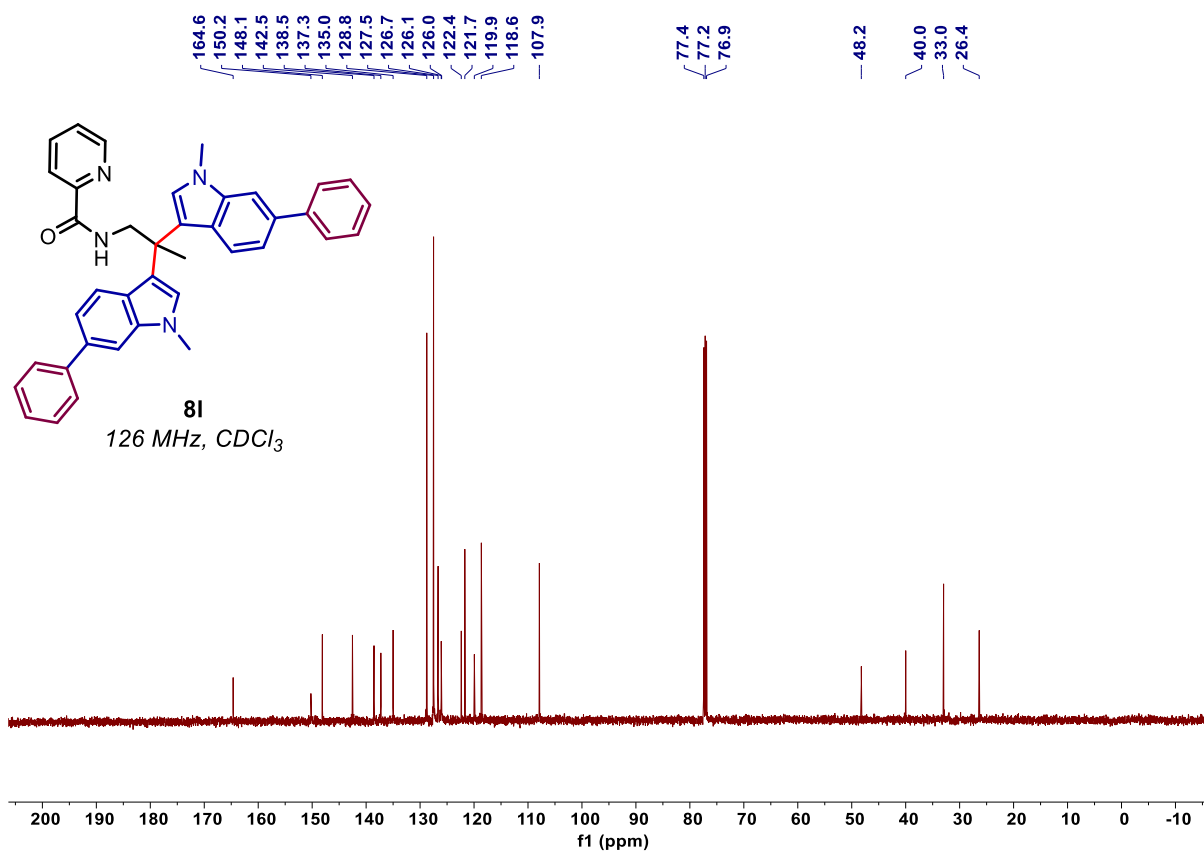

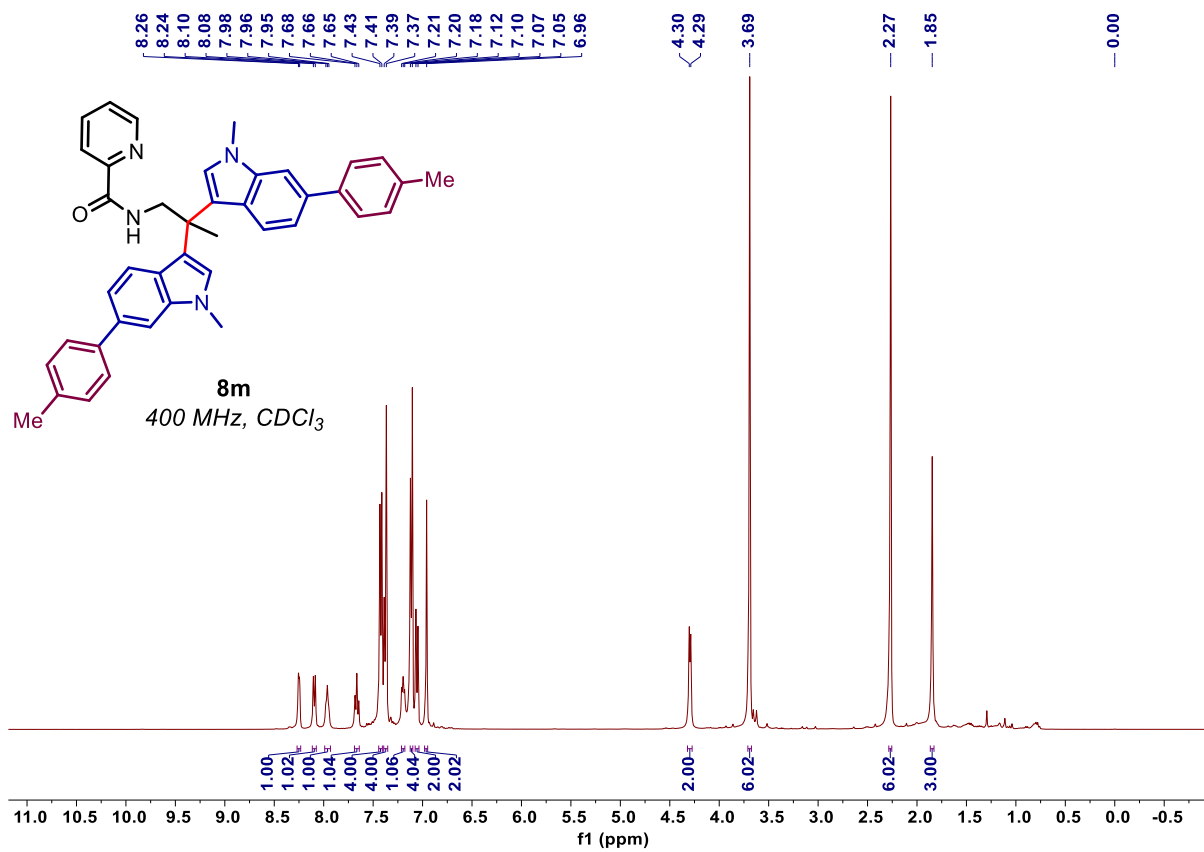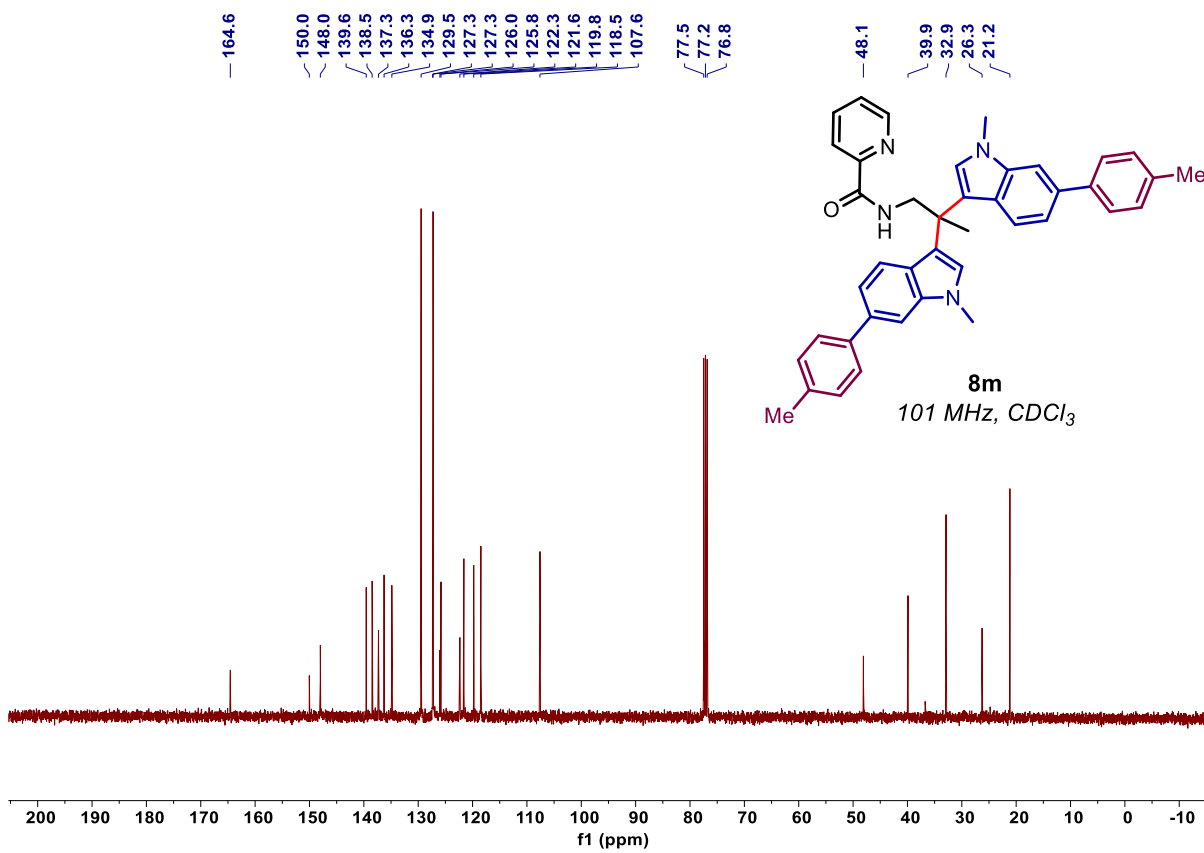

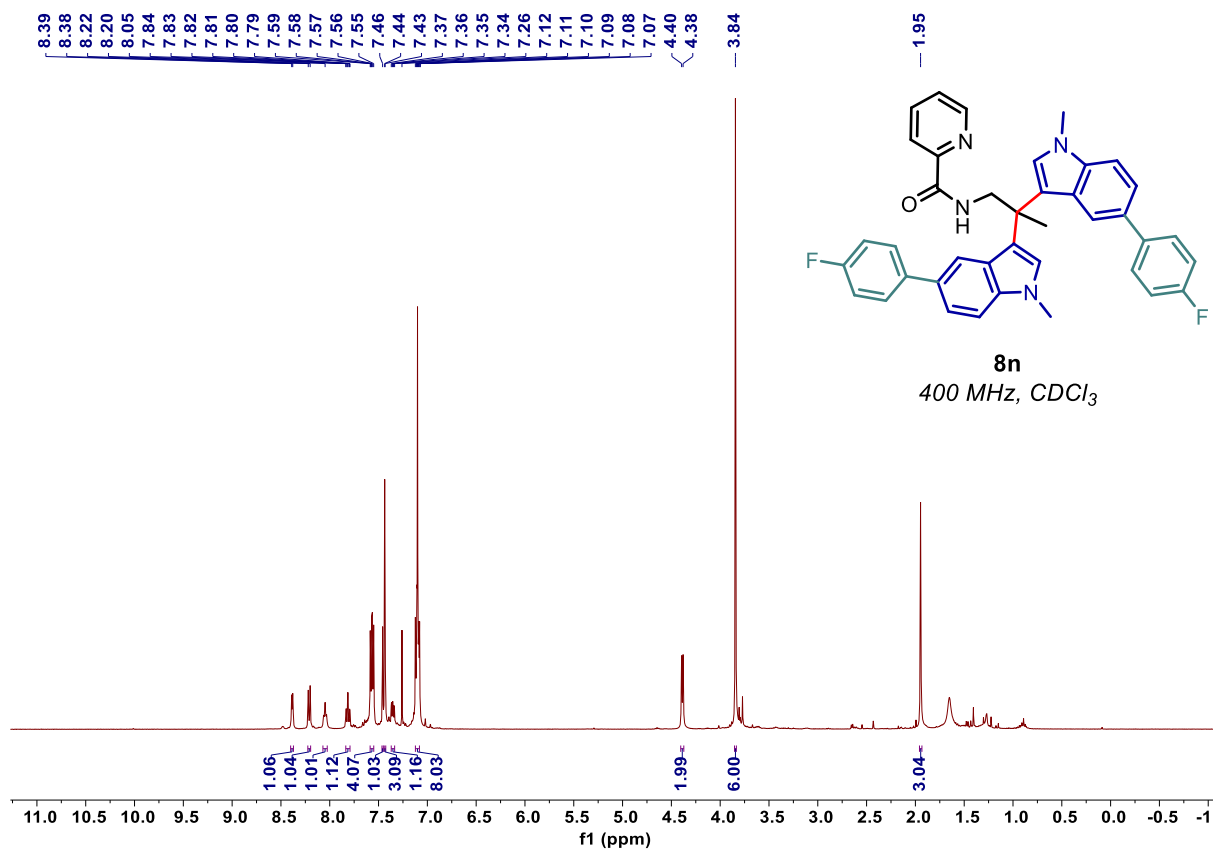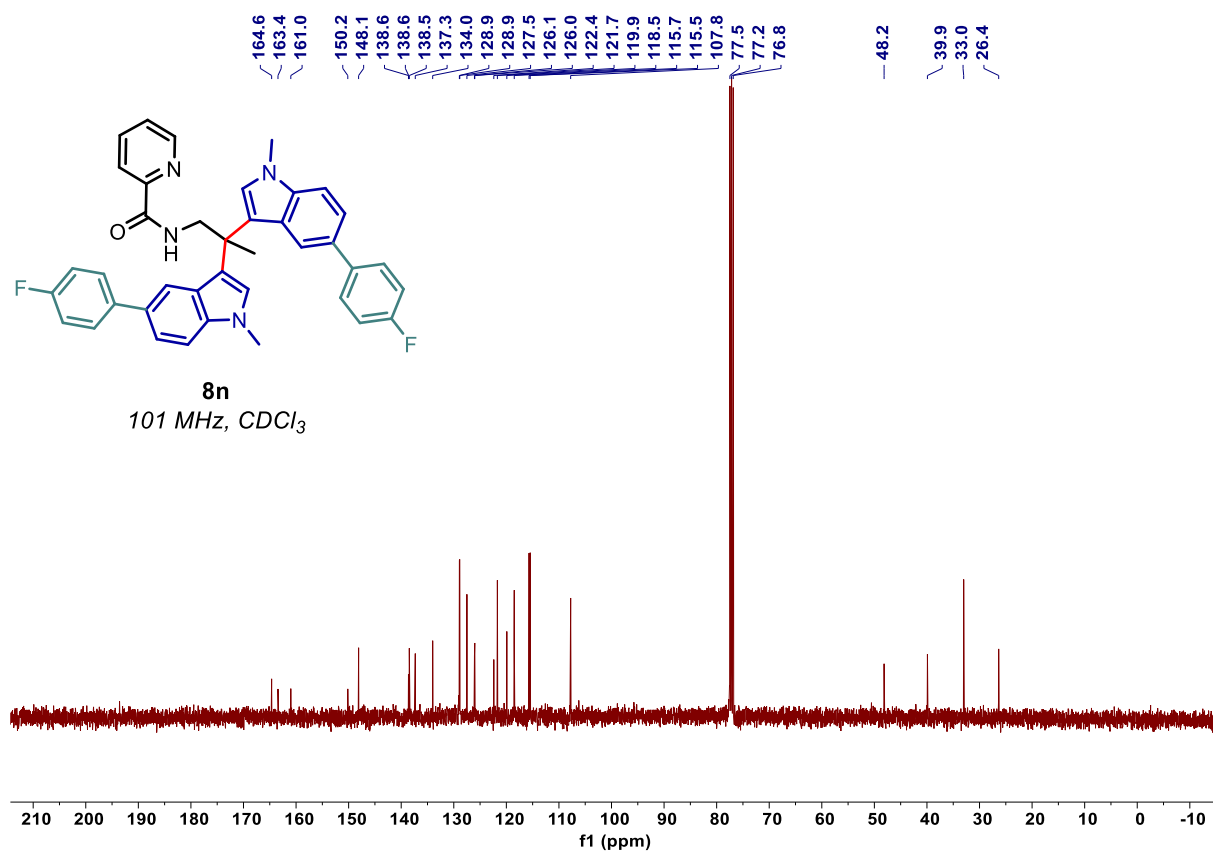

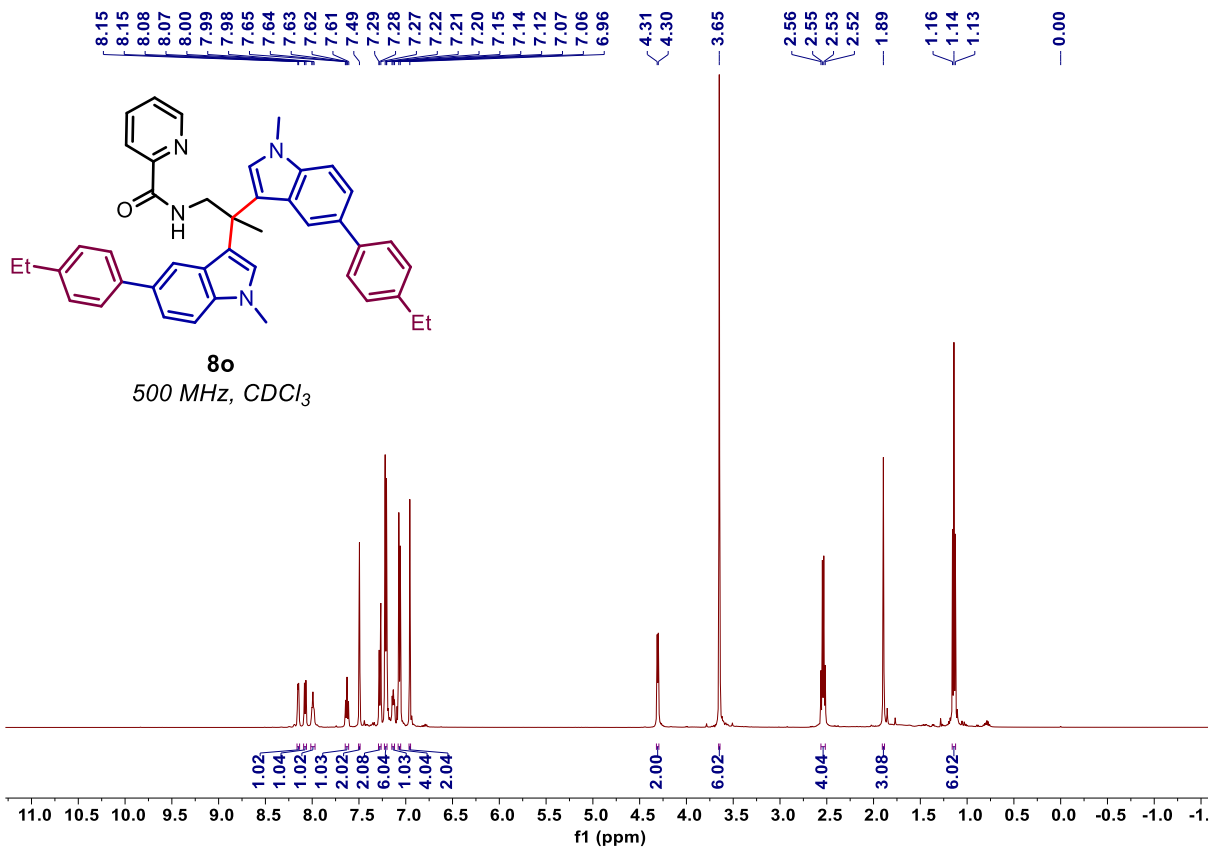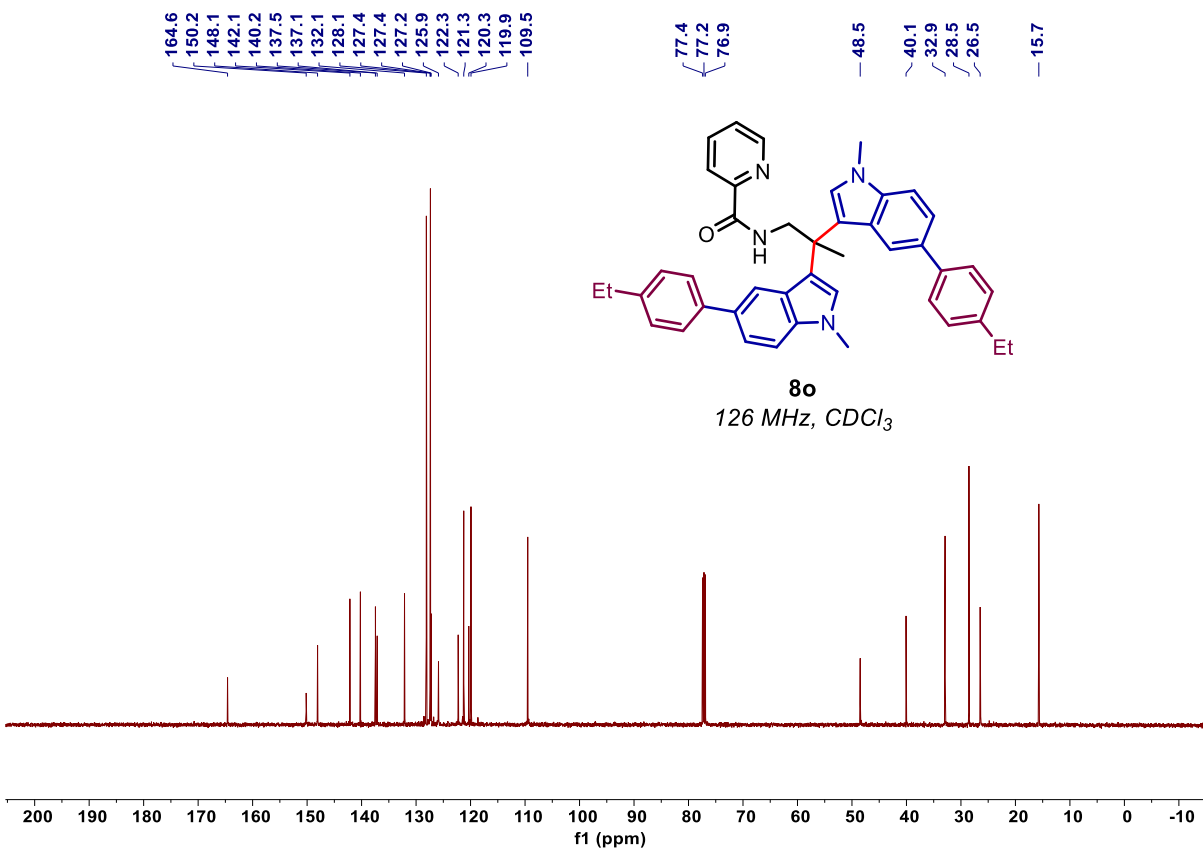

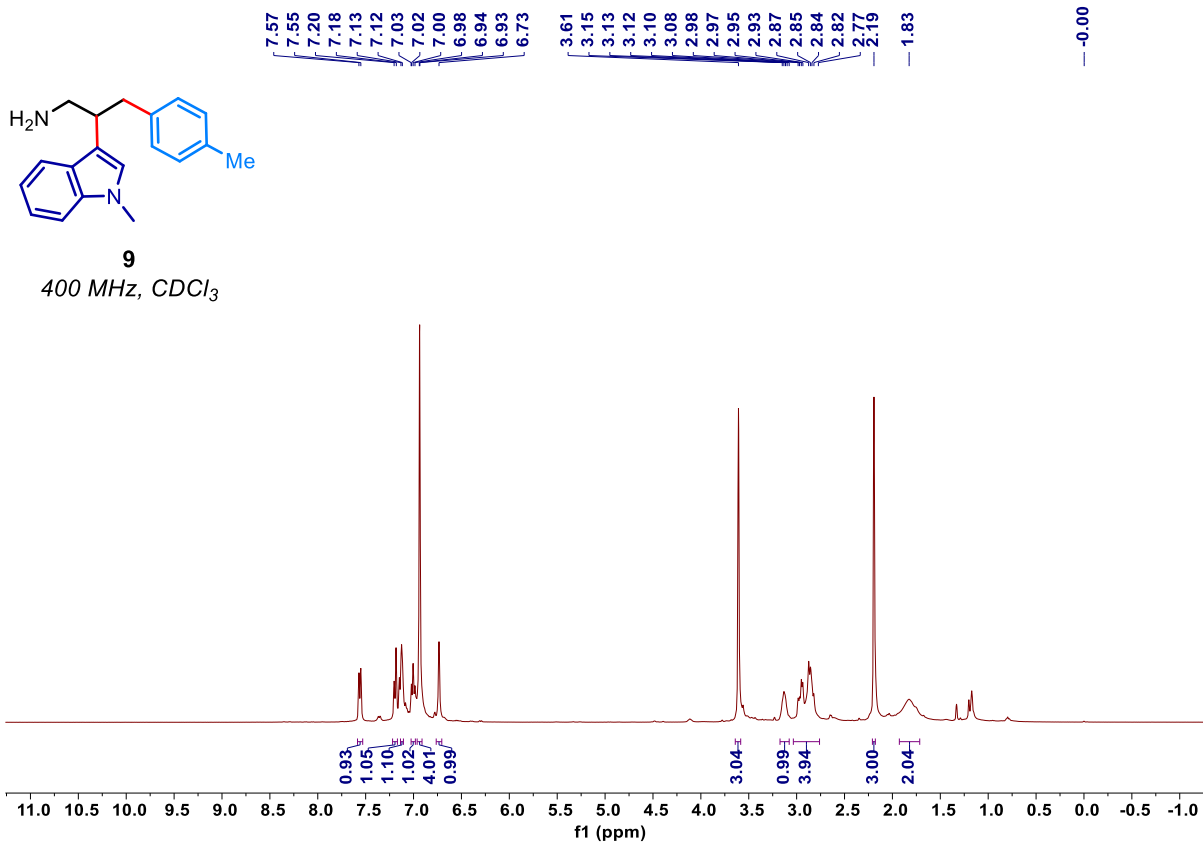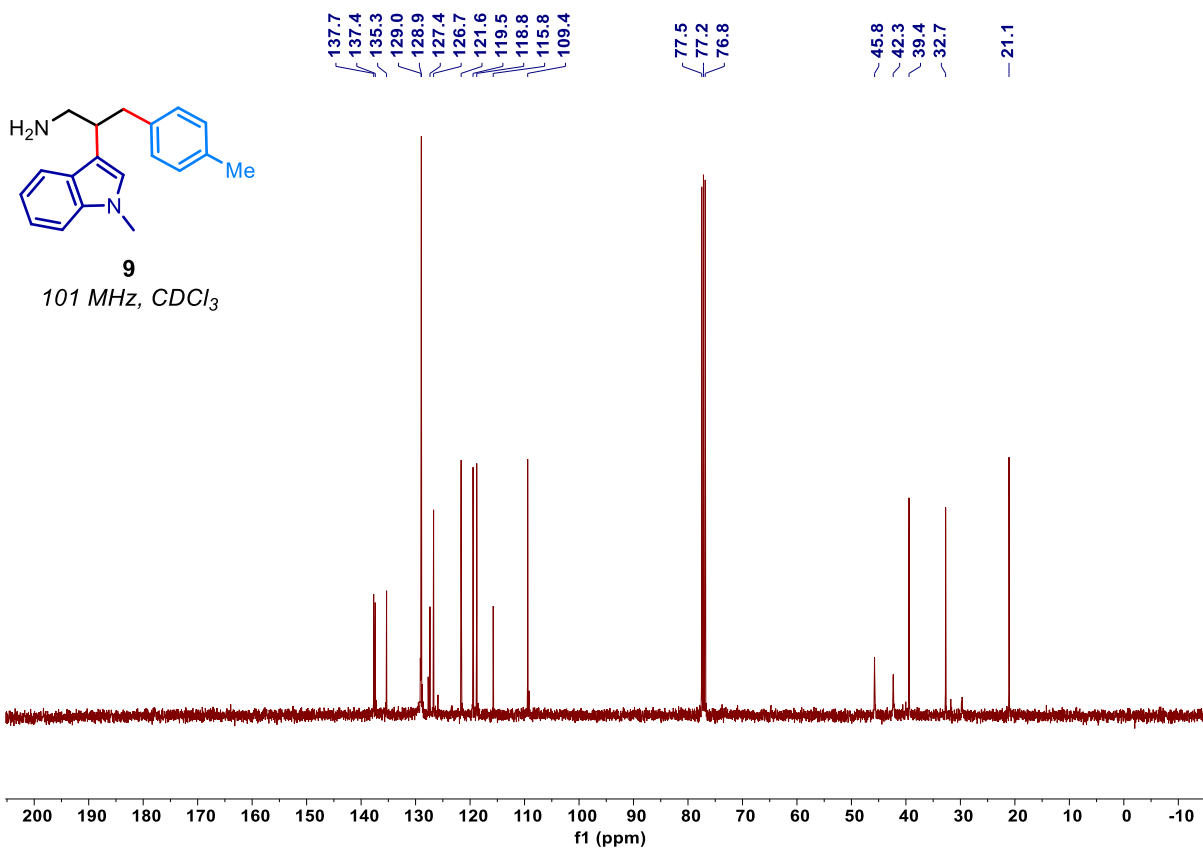



8.30  
8.17  
8.04  
8.02  
7.96  
7.94  
7.92  
7.89  
7.87  
7.81  
7.79  
7.77  
7.75  
7.66  
7.64  
7.62  
7.60  
7.23  
7.21  
7.20  
7.18  
7.16  
7.15  
7.14  
7.08  
7.06  
7.04  
6.97  
6.95  
6.94  
6.92  
6.88  
6.86  
6.84  
6.82  
6.80  
6.78  
6.75  
6.73  
6.71  
6.65  
6.62  
6.56  
6.54  
6.52  
6.21  
4.18  
4.17  
4.15  
4.13  
4.12  
4.00  
3.71  
3.70  
3.69  
3.68  
3.67  
3.66  
3.65  
3.59  
3.57  
3.55  
3.53  
3.51  
3.44  
3.23  
3.21  
3.19  
3.17  
3.16  
3.14  
3.12  
3.07  
3.06  
3.04  
2.15  
2.08

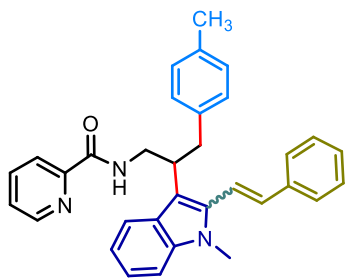

**10**  
dr = 4:1  
400 MHz, CDCl<sub>3</sub>

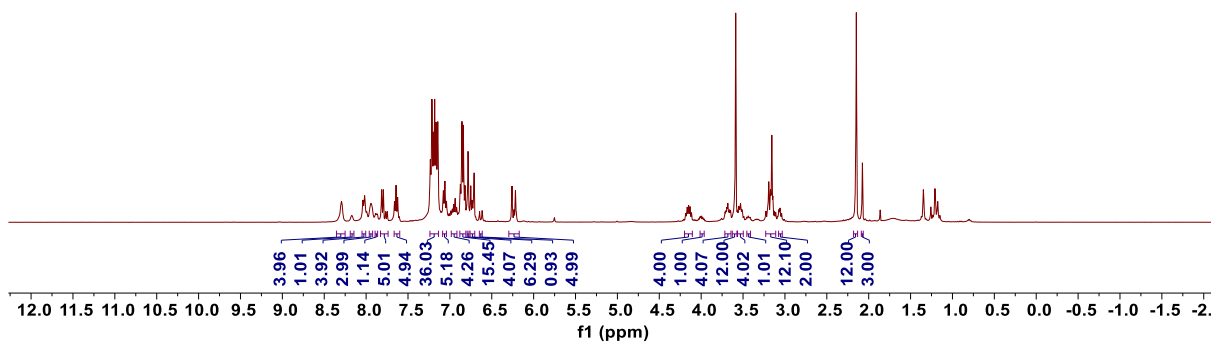

164.33  
150.02  
149.97  
147.95  
139.47  
139.16  
138.34  
138.03  
137.59  
137.46  
137.31  
137.19  
137.13  
137.01  
136.82  
136.55  
135.61  
135.32  
135.24  
135.19  
134.99  
134.92  
133.93  
133.86  
133.71  
133.68  
128.35  
128.32  
127.96  
127.75  
126.49  
126.33  
125.97  
122.23  
121.93  
121.40  
120.46  
120.15  
119.29  
119.20  
118.81  
117.16  
113.44  
112.32  
109.85  
109.58  
77.48  
77.16  
76.84  
43.87  
43.48  
40.81  
40.43  
38.89  
38.70  
31.05  
30.48  
21.09  
21.05

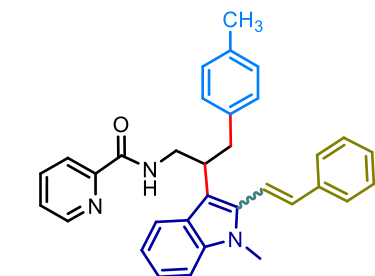

**10**  
dr = 4:1  
101 MHz, CDCl<sub>3</sub>

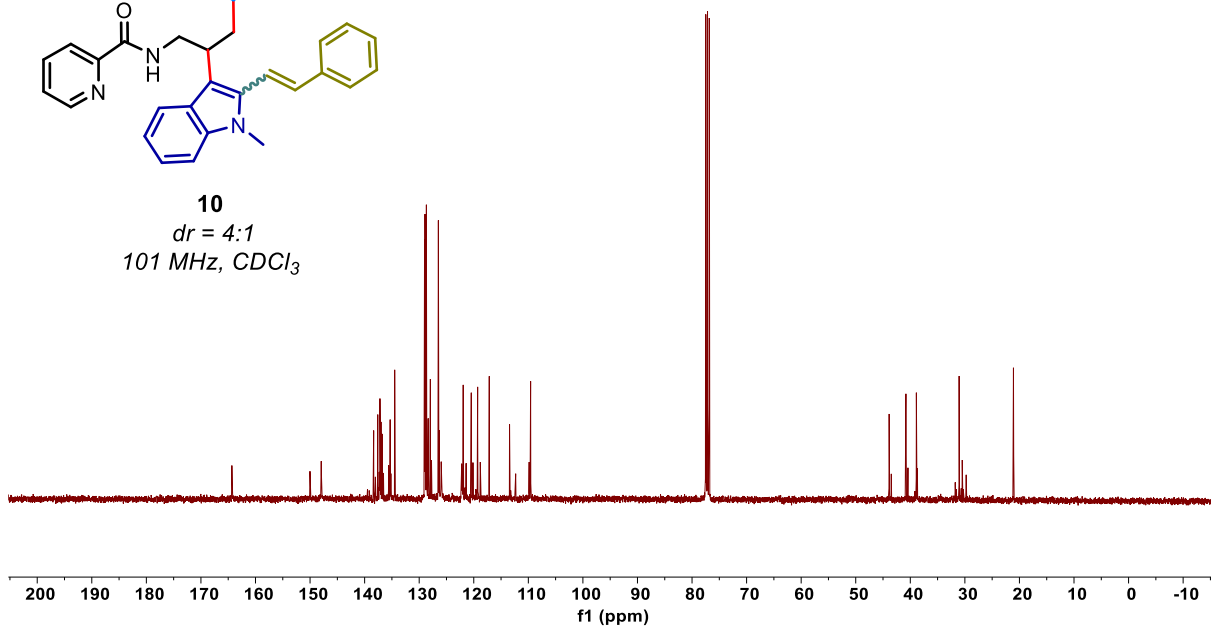

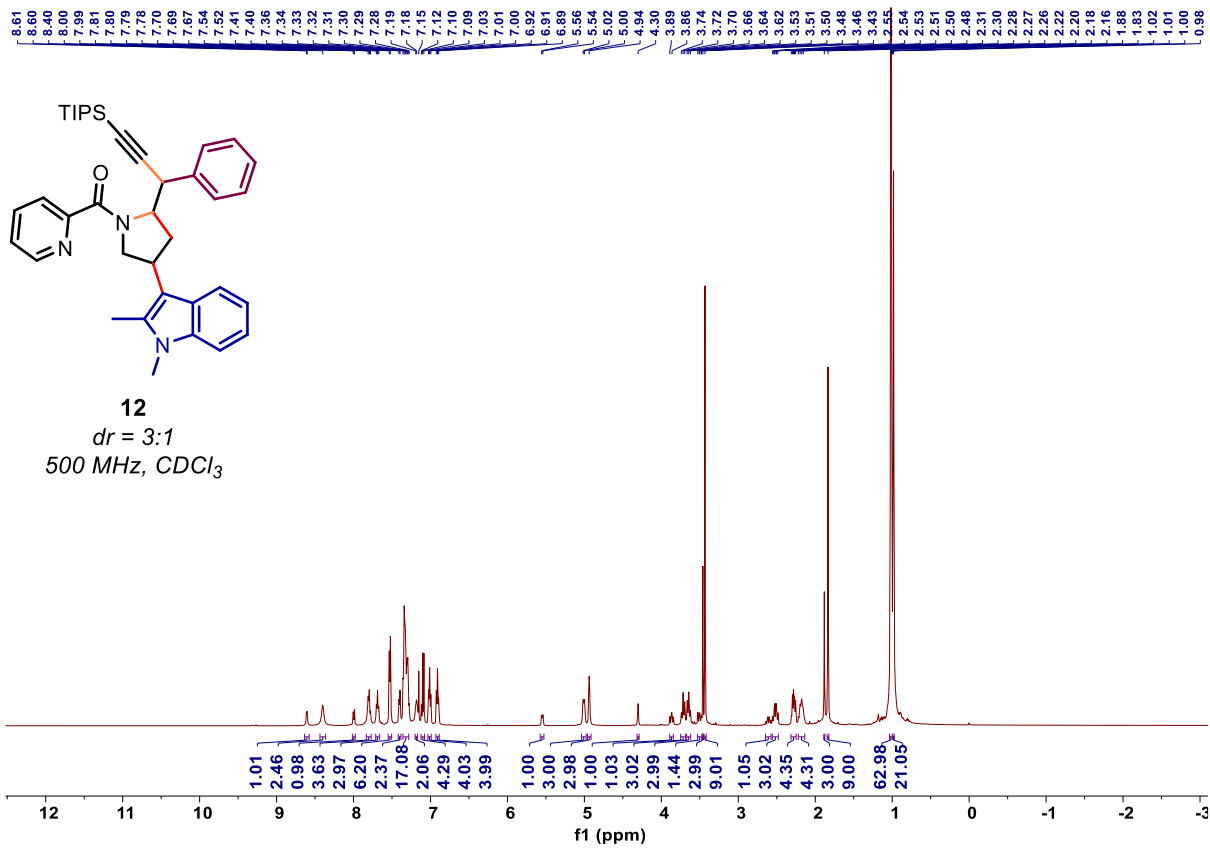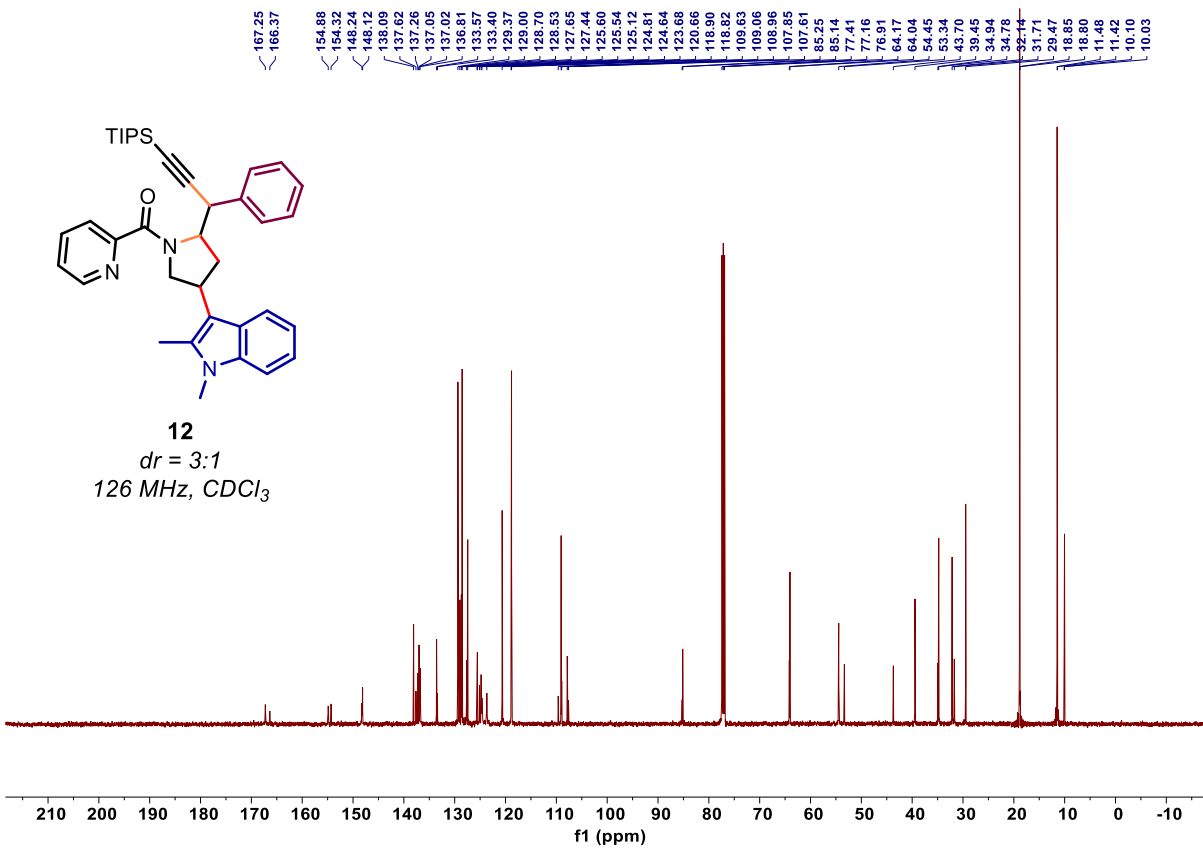

Supplement: d4sc00607k1.pdf [file d4sc00607k1.pdf]
